# Supplementary material for: High-throughput screening of bimetallic catalysts enabled by machine learning
Source: Royal Society of Chemistry journal article supplement (doi:10.1039/c7ta01812f), 2017-01-01
Supplement: c7ta01812f1.csv [file c7ta01812f1.csv]

name	filling	center	sigma_c	skewness	kurtosis	local_Pauling	IonizationPotential	ElectronAffinity	Pauling	WorkFunction	dBandCenter	AtomicRadius	OrbitalRadius
Co3Sc-Co	0.780575772	-1.226793541	1.719305669	0.543880843	3.486981082	1.788645054	7.88	0.66	1.88	5.76	-1.17	1.39	0.76
Co3Ti-Co	0.788917441	-1.316278767	1.721685668	0.473610276	3.363164018	1.823177952	7.88	0.66	1.88	5.76	-1.17	1.39	0.76
Co3V-Co	0.781796887	-1.376686939	1.730031487	0.411196028	3.290426069	1.839178856	7.88	0.66	1.88	5.76	-1.17	1.39	0.76
Co3Mn-Co	0.783823825	-1.225537198	1.552538122	0.247513037	3.893601945	1.824994325	7.88	0.66	1.88	5.76	-1.17	1.39	0.76
Co3Fe-Co	0.781406009	-1.313032474	1.734980825	0.329862089	3.287347262	1.872219694	7.88	0.66	1.88	5.76	-1.17	1.39	0.76
Co3Co-Co	0.775102109	-1.196786399	1.525308788	0.200228834	3.98851329	1.88	7.88	0.66	1.88	5.76	-1.17	1.39	0.76
Co3Ni-Co	0.779070494	-1.40638434	1.737991994	0.305116701	3.251974692	1.884584528	7.88	0.66	1.88	5.76	-1.17	1.39	0.76
Co3Cu-Co	0.780040409	-1.384322738	1.728868843	0.273061108	3.330053429	1.883063164	7.88	0.66	1.88	5.76	-1.17	1.39	0.76
Co3Y-Co	0.778987086	-1.223622438	1.7239309	0.594914739	3.628464151	1.759000028	7.88	0.66	1.88	5.76	-1.17	1.39	0.76
Co3Nb-Co	0.784449412	-1.310918944	1.776415434	0.424972229	3.276042585	1.83393016	7.88	0.66	1.88	5.76	-1.17	1.39	0.76
Co3Mo-Co	0.777665786	-1.328028888	1.762310299	0.312862691	3.240784223	1.920587694	7.88	0.66	1.88	5.76	-1.17	1.39	0.76
Co3Ru-Co	0.774369141	-1.383245664	1.791536871	0.242132972	3.120057356	1.926017066	7.88	0.66	1.88	5.76	-1.17	1.39	0.76
Co3Rh-Co	0.777473613	-1.424774323	1.798401016	0.207663151	3.131547412	1.936629835	7.88	0.66	1.88	5.76	-1.17	1.39	0.76
Co3Pd-Co	0.779760404	-1.420455078	1.790755371	0.174832178	3.171669142	1.926017066	7.88	0.66	1.88	5.76	-1.17	1.39	0.76
Co3Ag-Co	0.779459732	-1.394962639	1.728719385	0.245457937	3.363066626	1.887607144	7.88	0.66	1.88	5.76	-1.17	1.39	0.76
Co3La-Co	0.780280374	-1.23660267	1.695492623	0.555280075	3.633879024	1.731202314	7.88	0.66	1.88	5.76	-1.17	1.39	0.76
Co3Ta-Co	0.782436797	-1.285197488	1.810170074	0.445563163	3.318342281	1.815811162	7.88	0.66	1.88	5.76	-1.17	1.39	0.76
Co3W-Co	0.780318725	-1.331766519	1.796205993	0.306259359	3.281981242	1.946932057	7.88	0.66	1.88	5.76	-1.17	1.39	0.76
Co3Re-Co	0.781479787	-1.377903724	1.784440239	0.195578447	3.356744018	1.883620639	7.88	0.66	1.88	5.76	-1.17	1.39	0.76
Co3Os-Co	0.780834695	-1.423159179	1.804471206	0.153689477	3.320242079	1.926017066	7.88	0.66	1.88	5.76	-1.17	1.39	0.76
Co3Ir-Co	0.776798191	-1.438145269	1.835344419	0.120639288	3.227740075	1.926017066	7.88	0.66	1.88	5.76	-1.17	1.39	0.76
Co3Pt-Co	0.777183589	-1.446467014	1.846407983	0.052671304	3.263492326	1.936629835	7.88	0.66	1.88	5.76	-1.17	1.39	0.76
Co3Au-Co	0.779115065	-1.459455543	1.798716361	0.105930908	3.330573079	1.969073053	7.88	0.66	1.88	5.76	-1.17	1.39	0.76
Ni3Sc-Ni	0.879848353	-1.338552276	1.438255889	0.84153852	5.027886382	1.804890909	7.64	1.16	1.91	5.77	-1.29	1.38	0.71
Ni3Ti-Ni	0.886628651	-1.462482483	1.43195588	0.684566332	4.78857061	1.842671531	7.64	1.16	1.91	5.77	-1.29	1.38	0.71
Ni3Cr-Ni	0.872961033	-1.306739629	1.398106511	0.602700305	4.958344918	1.857155682	7.64	1.16	1.91	5.77	-1.29	1.38	0.71
Ni3Mn-Ni	0.880794912	-1.374036411	1.412742355	0.557419882	4.948365351	1.83186318	7.64	1.16	1.91	5.77	-1.29	1.38	0.71
Ni3Fe-Ni	0.876884133	-1.45127397	1.399576449	0.477561441	4.925112404	1.893724996	7.64	1.16	1.91	5.77	-1.29	1.38	0.71
Ni3Co-Ni	0.870877572	-1.429962816	1.387908543	0.450454794	4.889734547	1.903961944	7.64	1.16	1.91	5.77	-1.29	1.38	0.71
Ni3Ni-Ni	0.867716853	-1.405790032	1.374056827	0.454568849	4.933961105	1.91	7.64	1.16	1.91	5.77	-1.29	1.38	0.71
Ni3Cu-Ni	0.880682318	-1.357118318	1.363847561	0.405976037	5.046869223	1.907995798	7.64	1.16	1.91	5.77	-1.29	1.38	0.71
Ni3Y-Ni	0.876699203	-1.288932086	1.451244542	0.954967678	5.330761472	1.772506261	7.64	1.16	1.91	5.77	-1.29	1.38	0.71
Ni3Zr-Ni	0.880795942	-1.453881369	1.514005915	0.817169969	4.66496197	1.798193456	7.64	1.16	1.91	5.77	-1.29	1.38	0.71
Ni3Nb-Ni	0.876489143	-1.474685862	1.510054171	0.613905092	4.427815368	1.843532042	7.64	1.16	1.91	5.77	-1.29	1.38	0.71
Ni3Mo-Ni	0.876117763	-1.473472759	1.477674387	0.491437541	4.535770472	1.957570646	7.64	1.16	1.91	5.77	-1.29	1.38	0.71
Ni3Ru-Ni	0.870293012	-1.453627698	1.447026072	0.369133856	4.53987421	1.964767791	7.64	1.16	1.91	5.77	-1.29	1.38	0.71
Ni3Rh-Ni	0.876589645	-1.451082007	1.43536141	0.322436861	4.63763601	1.97885359	7.64	1.16	1.91	5.77	-1.29	1.38	0.71
Ni3Pd-Ni	0.87640657	-1.395796342	1.422245077	0.246047675	4.726252343	1.964767791	7.64	1.16	1.91	5.77	-1.29	1.38	0.71
Ni3Ag-Ni	0.878143828	-1.332016883	1.396547512	0.220062794	5.131914277	1.913318882	7.64	1.16	1.91	5.77	-1.29	1.38	0.71
Ni3La-Ni	0.874445891	-1.251440316	1.420717386	0.918569356	5.378277679	1.742180922	7.64	1.16	1.91	5.77	-1.29	1.38	0.71
Ni3Ta-Ni	0.880592787	-1.492384931	1.542127683	0.62147767	4.479540869	1.819889191	7.64	1.16	1.91	5.77	-1.29	1.38	0.71
Ni3W-Ni	0.877124323	-1.486584962	1.518750872	0.464068286	4.549752806	1.992549386	7.64	1.16	1.91	5.77	-1.29	1.38	0.71
Ni3Re-Ni	0.875895965	-1.485250281	1.493694576	0.330368658	4.638573636	1.907995798	7.64	1.16	1.91	5.77	-1.29	1.38	0.71
Ni3Os-Ni	0.869756584	-1.452773393	1.482821015	0.253161564	4.637775485	1.964767791	7.64	1.16	1.91	5.77	-1.29	1.38	0.71
Ni3Ir-Ni	0.875508764	-1.492975499	1.488815837	0.199244472	4.629228247	1.964767791	7.64	1.16	1.91	5.77	-1.29	1.38	0.71
Ni3Pt-Ni	0.879190819	-1.433048638	1.47097846	0.082128554	4.815746409	1.97885359	7.64	1.16	1.91	5.77	-1.29	1.38	0.71
Ni3Au-Ni	0.879199073	-1.388931657	1.455020903	-0.001552406	5.143550449	2.022057202	7.64	1.16	1.91	5.77	-1.29	1.38	0.71
Cu3Sc-Cu	0.969145604	-2.909931694	1.110859033	1.874567907	10.94859251	1.777095072	7.73	1.24	1.9	5.3	-2.67	1.41	0.67
Cu3Ti-Cu	0.968327843	-2.883386311	1.093702855	1.676030104	10.29779941	1.821826542	7.73	1.24	1.9	5.3	-2.67	1.41	0.67
Cu3V-Cu	0.970063667	-2.689223718	1.103984625	1.599559132	10.16496062	1.842639606	7.73	1.24	1.9	5.3	-2.67	1.41	0.67
Cu3Cr-Cu	0.971914367	-2.552793137	1.092816996	1.517619983	10.26566907	1.849372938	7.73	1.24	1.9	5.3	-2.67	1.41	0.67
Cu3Mn-Cu	0.971222975	-2.665839261	1.092929541	1.371490407	10.01675512	1.824186429	7.73	1.24	1.9	5.3	-2.67	1.41	0.67
Cu3Fe-Cu	0.971413833	-2.518793097	1.063688217	1.263771892	9.780254214	1.885789003	7.73	1.24	1.9	5.3	-2.67	1.41	0.67
Cu3Co-Cu	0.970832428	-2.339818991	1.050355948	1.161363032	9.461156959	1.895983051	7.73	1.24	1.9	5.3	-2.67	1.41	0.67
Cu3Ni-Cu	0.97200655	-2.270503842	1.048942317	1.13078425	9.427457545	1.901995803	7.73	1.24	1.9	5.3	-2.67	1.41	0.67
Cu3Cu-Cu	0.972215011	-2.383479033	1.049691457	1.120221494	9.923558007	1.9	7.73	1.24	1.9	5.3	-2.67	1.41	0.67
Cu3Y-Cu	0.968463291	-2.89212118	1.126895384	2.02342588	11.58173508	1.738900959	7.73	1.24	1.9	5.3	-2.67	1.41	0.67
Cu3Zr-Cu	0.966227832	-3.123098952	1.178035148	1.92706818	10.56314936	1.769184839	7.73	1.24	1.9	5.3	-2.67	1.41	0.67
Cu3Nb-Cu	0.964717619	-3.008813145	1.168147223	1.696438631	9.761558257	1.83580639	7.73	1.24	1.9	5.3	-2.67	1.41	0.67
Cu3Mo-Cu	0.966676688	-2.762523247	1.154412934	1.45444753	8.956842935	1.949367095	7.73	1.24	1.9	5.3	-2.67	1.41	0.67
Cu3Ru-Cu	0.968105349	-2.322191188	1.109356186	1.085004073	8.071119658	1.956534079	7.73	1.24	1.9	5.3	-2.67	1.41	0.67
Cu3Rh-Cu	0.969400509	-2.206259247	1.104378785	0.953346362	7.880791731	1.97056085	7.73	1.24	1.9	5.3	-2.67	1.41	0.67
Cu3Pd-Cu	0.971675024	-2.213713346	1.089115575	0.805026759	8.024738835	1.956534079	7.73	1.24	1.9	5.3	-2.67	1.41	0.67
Cu3Ag-Cu	0.974797595	-2.457972904	1.101251685	0.697915648	9.246074699	1.90596246	7.73	1.24	1.9	5.3	-2.67	1.41	0.67
Cu3La-Cu	0.968844636	-2.840762749	1.100704459	2.041141162	12.06776225	1.703261845	7.73	1.24	1.9	5.3	-2.67	1.41	0.67
Cu3Ta-Cu	0.964371642	-3.130543065	1.201573947	1.69563175	9.903528771	1.812262619	7.73	1.24	1.9	5.3	-2.67	1.41	0.67
Cu3W-Cu	0.963873763	-2.8599695	1.182909845	1.468408172	9.095603252	1.984199251	7.73	1.24	1.9	5.3	-2.67	1.41	0.67
Cu3Re-Cu	0.966086158	-2.643060079	1.164376969	1.23512443	8.449744842	1.9	7.73	1.24	1.9	5.3	-2.67	1.41	0.67
Cu3Os-Cu	0.966826608	-2.415983184	1.145936729	1.043777771	7.997502764	1.956534079	7.73	1.24	1.9	5.3	-2.67	1.41	0.67
Cu3Ir-Cu	0.968415036	-2.268172308	1.135660571	0.867546442	7.721432903	1.956534079	7.73	1.24	1.9	5.3	-2.67	1.41	0.67
Cu3Pt-Cu	0.970204848	-2.25483637	1.136067361	0.650259919	7.628285776	1.97056085	7.73	1.24	1.9	5.3	-2.67	1.41	0.67
Cu3Au-Cu	0.97405628	-2.455049516	1.151775894	0.449089316	8.633955688	2.013583409	7.73	1.24	1.9	5.3	-2.67	1.41	0.67
Ru3Sc-Ru	0.730880975	-1.278243649	2.056841765	0.352219215	2.755321127	1.998232077	7.36	1.05	2.2	5.73	-1.41	1.48	1.05
Ru3Ti-Ru	0.730194256	-1.323193199	2.036738519	0.251358886	2.586392091	2.048529813	7.36	1.05	2.2	5.73	-1.41	1.48	1.05
Ru3V-Ru	0.722917059	-1.359684142	2.038241041	0.171411463	2.499806529	2.0719328	7.36	1.05	2.2	5.73	-1.41	1.48	1.05
Ru3Cr-Ru	0.722059693	-1.345538141	2.032874716	0.182760253	2.556978405	2.07950401	7.36	1.05	2.2	5.73	-1.41	1.48	1.05
Ru3Mn-Ru	0.715620259	-1.390517489	2.021740758	0.134584749	2.539750134	2.051183358	7.36	1.05	2.2	5.73	-1.41	1.48	1.05
Ru3Fe-Ru	0.721825574	-1.382473367	2.008946858	0.130553302	2.598164805	2.120451593	7.36	1.05	2.2	5.73	-1.41	1.48	1.05
Ru3Co-Ru	0.714829903	-1.370356688	2.003624931	0.118480942	2.602678501	2.131914162	7.36	1.05	2.2	5.73	-1.41	1.48	1.05
Ru3Ni-Ru	0.718248932	-1.394565044	2.000712212	0.125688676	2.62569175	2.138675125	7.36	1.05	2.2	5.73	-1.41	1.48	1.05
Ru3Y-Ru	0.725747478	-1.245941308	2.071941469	0.419232824	2.89302924	1.95528519	7.36	1.05	2.2	5.73	-1.41	1.48	1.05
Ru3Zr-Ru	0.732369987	-1.292276989	2.140757593	0.401131109	2.749914836	1.989337516	7.36	1.05	2.2	5.73	-1.41	1.48	1.05
Ru3Nb-Ru	0.721989704	-1.328588819	2.135239993	0.273244975	2.547407597	2.064249277	7.36	1.05	2.2	5.73	-1.41	1.48	1.05
Ru3Mo-Ru	0.719988685	-1.385007847	2.120011577	0.185819231	2.470637995	2.191941175	7.36	1.05	2.2	5.73	-1.41	1.48	1.05
Ru3Ru-Ru	0.705151956	-1.408756268	2.07756513	0.107570537	2.469496521	2.2	7.36	1.05	2.2	5.73	-1.41	1.48	1.05
Ru3Rh-Ru	0.71440768	-1.410064932	2.058619053	0.08131801	2.486593645	2.215772225	7.36	1.05	2.2	5.73	-1.41	1.48	1.05
Ru3Pd-Ru	0.717564023	-1.395499627	2.03697121	0.053333845	2.552142981	2.2	7.36	1.05	2.2	5.73	-1.41	1.48	1.05
Ru3Ag-Ru	0.721497261	-1.394879112	2.038084495	0.023190854	2.717318618	2.143135383	7.36	1.05	2.2	5.73	-1.41	1.48	1.05
Ru3La-Ru	0.729333964	-1.253935261	2.057522422	0.387819568	2.83194009	1.915211239	7.36	1.05	2.2	5.73	-1.41	1.48	1.05
Ru3Ta-Ru	0.725461456	-1.337754085	2.170733921	0.299789549	2.622742936	2.037775782	7.36	1.05	2.2	5.73	-1.41	1.48	1.05
Ru3W-Ru	0.723141045	-1.404783843	2.164549958	0.195838761	2.519215941	2.231107752	7.36	1.05	2.2	5.73	-1.41	1.48	1.05
Ru3Re-Ru	0.724599358	-1.470263974	2.106760577	0.045900399	2.351616652	2.13643097	7.36	1.05	2.2	5.73	-1.41	1.48	1.05
Ru3Os-Ru	0.714829456	-1.436747345	2.133868373	0.072932474	2.502118332	2.2	7.36	1.05	2.2	5.73	-1.41	1.48	1.05
Ru3Ir-Ru	0.714301383	-1.433379866	2.121708039	0.038414588	2.52346893	2.2	7.36	1.05	2.2	5.73	-1.41	1.48	1.05
Ru3Pt-Ru	0.716309049	-1.425155007	2.103725795	0.003704741	2.565793206	2.215772225	7.36	1.05	2.2	5.73	-1.41	1.48	1.05
Ru3Au-Ru	0.713714107	-1.391779635	2.087842481	-0.053649285	2.719198568	2.264148397	7.36	1.05	2.2	5.73	-1.41	1.48	1.05
Rh3Sc-Rh	0.811779097	-1.58623184	1.914470146	0.580290777	3.426608701	2.056154096	7.46	1.14	2.28	5.91	-1.73	1.49	0.99
Rh3V-Rh	0.807609014	-1.683494366	1.869684516	0.390628668	3.186295408	2.131991154	7.46	1.14	2.28	5.91	-1.73	1.49	0.99
Rh3Cr-Rh	0.806203869	-1.648138598	1.867545726	0.400836642	3.248044903	2.139781829	7.46	1.14	2.28	5.91	-1.73	1.49	0.99
Rh3Mn-Rh	0.80471425	-1.693325019	1.845678126	0.33877912	3.244418222	2.110640257	7.46	1.14	2.28	5.91	-1.73	1.49	0.99
Rh3Fe-Rh	0.80971611	-1.617286429	1.834941048	0.312598792	3.283353618	2.181916344	7.46	1.14	2.28	5.91	-1.73	1.49	0.99
Rh3Co-Rh	0.805701446	-1.622058388	1.824448028	0.299568048	3.275386411	2.193711174	7.46	1.14	2.28	5.91	-1.73	1.49	0.99
Rh3Ni-Rh	0.800970121	-1.608710827	1.813675291	0.292487904	3.290904118	2.200668115	7.46	1.14	2.28	5.91	-1.73	1.49	0.99
Rh3Cu-Rh	0.81082996	-1.588065698	1.813957256	0.277311595	3.322300921	2.198358909	7.46	1.14	2.28	5.91	-1.73	1.49	0.99
Rh3Y-Rh	0.812554507	-1.563664131	1.985296401	0.735064046	3.725876771	2.011962323	7.46	1.14	2.28	5.91	-1.73	1.49	0.99
Rh3Zr-Rh	0.810691377	-1.680921579	1.990821722	0.591848422	3.283162996	2.047001712	7.46	1.14	2.28	5.91	-1.73	1.49	0.99
Rh3Nb-Rh	0.80483163	-1.729566096	1.9764749	0.450720157	3.069425682	2.124084913	7.46	1.14	2.28	5.91	-1.73	1.49	0.99
Rh3Mo-Rh	0.802195276	-1.725531656	1.942072924	0.374485449	3.057460767	2.255478169	7.46	1.14	2.28	5.91	-1.73	1.49	0.99
Rh3Ru-Rh	0.803631998	-1.723578006	1.887831026	0.29126021	3.088376834	2.263770592	7.46	1.14	2.28	5.91	-1.73	1.49	0.99
Rh3Rh-Rh	0.790923346	-1.695593342	1.876600066	0.260073181	3.119721635	2.28	7.46	1.14	2.28	5.91	-1.73	1.49	0.99
Rh3Pd-Rh	0.806634106	-1.646890507	1.854589421	0.222037045	3.147889414	2.263770592	7.46	1.14	2.28	5.91	-1.73	1.49	0.99
Rh3Ag-Rh	0.806393338	-1.586673601	1.851997753	0.180322002	3.29484447	2.205257661	7.46	1.14	2.28	5.91	-1.73	1.49	0.99
Rh3La-Rh	0.811047559	-1.555559447	1.962453718	0.710014909	3.693126292	1.970726764	7.46	1.14	2.28	5.91	-1.73	1.49	0.99
Rh3Ta-Rh	0.806853391	-1.715112167	2.003896839	0.462874013	3.121976371	2.096844039	7.46	1.14	2.28	5.91	-1.73	1.49	0.99
Rh3W-Rh	0.804048572	-1.737801401	1.986658603	0.366086583	3.066595877	2.295780053	7.46	1.14	2.28	5.91	-1.73	1.49	0.99
Rh3Re-Rh	0.799364072	-1.723529238	1.962752645	0.290244862	3.059286387	2.198358909	7.46	1.14	2.28	5.91	-1.73	1.49	0.99
Rh3Os-Rh	0.802523581	-1.75327642	1.943175763	0.249001135	3.079625177	2.263770592	7.46	1.14	2.28	5.91	-1.73	1.49	0.99
Rh3Ir-Rh	0.802187261	-1.725086647	1.925214271	0.207402251	3.100361905	2.263770592	7.46	1.14	2.28	5.91	-1.73	1.49	0.99
Rh3Pt-Rh	0.802231489	-1.690544849	1.914986669	0.1581508	3.111122789	2.28	7.46	1.14	2.28	5.91	-1.73	1.49	0.99
Rh3Au-Rh	0.80631232	-1.645076711	1.90586518	0.102911356	3.23911744	2.329778435	7.46	1.14	2.28	5.91	-1.73	1.49	0.99
Pd3Sc-Pd	0.931709756	-1.932244364	1.500282324	0.892104614	4.757391778	1.998232077	8.34	0.56	2.2	5.9	-1.83	1.52	0.94
Pd3Ti-Pd	0.931095304	-1.940501832	1.449695317	0.638846396	4.269892955	2.048529813	8.34	0.56	2.2	5.9	-1.83	1.52	0.94
Pd3V-Pd	0.927181344	-1.915751811	1.447682374	0.636844487	4.352362075	2.0719328	8.34	0.56	2.2	5.9	-1.83	1.52	0.94
Pd3Cr-Pd	0.92776815	-1.826464455	1.44278648	0.665112353	4.499105555	2.07950401	8.34	0.56	2.2	5.9	-1.83	1.52	0.94
Pd3Mn-Pd	0.923629856	-1.748570855	1.444063185	0.580785747	4.4366255	2.051183358	8.34	0.56	2.2	5.9	-1.83	1.52	0.94
Pd3Fe-Pd	0.926925191	-1.809425924	1.419901725	0.498982866	4.409729092	2.120451593	8.34	0.56	2.2	5.9	-1.83	1.52	0.94
Pd3Co-Pd	0.926205016	-1.781849524	1.406131814	0.479802628	4.381421502	2.131914162	8.34	0.56	2.2	5.9	-1.83	1.52	0.94
Pd3Ni-Pd	0.925359601	-1.732940502	1.391318954	0.498403538	4.401166076	2.138675125	8.34	0.56	2.2	5.9	-1.83	1.52	0.94
Pd3Cu-Pd	0.924676577	-1.655277019	1.390022769	0.455724835	4.354900088	2.13643097	8.34	0.56	2.2	5.9	-1.83	1.52	0.94
Pd3Y-Pd	0.92881967	-1.984438758	1.582044903	1.144515318	5.393274271	1.95528519	8.34	0.56	2.2	5.9	-1.83	1.52	0.94
Pd3Zr-Pd	0.928823642	-2.057049537	1.565034358	0.876159537	4.573267347	1.989337516	8.34	0.56	2.2	5.9	-1.83	1.52	0.94
Pd3Nb-Pd	0.924406649	-2.048164269	1.530337422	0.68130575	4.226247699	2.064249277	8.34	0.56	2.2	5.9	-1.83	1.52	0.94
Pd3Mo-Pd	0.92067518	-2.025995587	1.504658133	0.580573725	4.081476435	2.191941175	8.34	0.56	2.2	5.9	-1.83	1.52	0.94
Pd3Ru-Pd	0.913296379	-1.806468199	1.464022908	0.455094872	3.950162785	2.2	8.34	0.56	2.2	5.9	-1.83	1.52	0.94
Pd3Rh-Pd	0.916058631	-1.778549807	1.442502661	0.449811372	4.03831577	2.215772225	8.34	0.56	2.2	5.9	-1.83	1.52	0.94
Pd3Pd-Pd	0.917306575	-1.711053007	1.426094341	0.39040219	3.983247775	2.2	8.34	0.56	2.2	5.9	-1.83	1.52	0.94
Pd3Ag-Pd	0.923728678	-1.66870642	1.430040477	0.297459409	4.274862389	2.143135383	8.34	0.56	2.2	5.9	-1.83	1.52	0.94
Pd3La-Pd	0.931441742	-2.085015548	1.602425321	1.22317145	5.586723722	1.915211239	8.34	0.56	2.2	5.9	-1.83	1.52	0.94
Pd3Ta-Pd	0.925091854	-2.084023729	1.58011849	0.694533621	4.338771222	2.037775782	8.34	0.56	2.2	5.9	-1.83	1.52	0.94
Pd3W-Pd	0.920583122	-2.083367493	1.553972256	0.565956182	4.150525262	2.231107752	8.34	0.56	2.2	5.9	-1.83	1.52	0.94
Pd3Re-Pd	0.91976219	-2.039749389	1.523771795	0.470635272	4.054535863	2.13643097	8.34	0.56	2.2	5.9	-1.83	1.52	0.94
Pd3Os-Pd	0.918955605	-1.941374075	1.505668601	0.409063876	3.991755321	2.2	8.34	0.56	2.2	5.9	-1.83	1.52	0.94
Pd3Ir-Pd	0.915426087	-1.835371298	1.48584562	0.376086986	3.985197433	2.2	8.34	0.56	2.2	5.9	-1.83	1.52	0.94
Pd3Pt-Pd	0.914508577	-1.7351046	1.473621942	0.308697274	3.939231419	2.215772225	8.34	0.56	2.2	5.9	-1.83	1.52	0.94
Pd3Au-Pd	0.924417279	-1.714304105	1.474173161	0.201717977	4.139929088	2.264148397	8.34	0.56	2.2	5.9	-1.83	1.52	0.94
Ag3Sc-Ag	0.978254863	-4.270200994	1.166176322	2.813299475	16.62444853	1.799507367	7.58	1.3	1.93	5.01	-4.3	1.59	0.89
Ag3Ti-Ag	0.979660749	-4.156952191	1.131139023	2.701952577	16.65241644	1.84480298	7.58	1.3	1.93	5.01	-4.3	1.59	0.89
Ag3V-Ag	0.980625956	-4.026335533	1.144659823	2.775841052	17.19526592	1.865878533	7.58	1.3	1.93	5.01	-4.3	1.59	0.89
Ag3Cr-Ag	0.981817908	-4.036279661	1.139233298	2.784824222	17.61145158	1.872696785	7.58	1.3	1.93	5.01	-4.3	1.59	0.89
Ag3Mn-Ag	0.980472943	-4.097314156	1.149148598	2.704883567	17.41295842	1.847192629	7.58	1.3	1.93	5.01	-4.3	1.59	0.89
Ag3Fe-Ag	0.982298607	-4.012197121	1.122512912	2.691290047	17.68191822	1.909572119	7.58	1.3	1.93	5.01	-4.3	1.59	0.89
Ag3Co-Ag	0.981962618	-3.872489175	1.111071306	2.635300937	17.4422387	1.919894732	7.58	1.3	1.93	5.01	-4.3	1.59	0.89
Ag3Ni-Ag	0.982242023	-3.761774341	1.099522781	2.59112115	17.31508273	1.925983316	7.58	1.3	1.93	5.01	-4.3	1.59	0.89
Ag3Cu-Ag	0.982716044	-3.939138431	1.11767015	2.623864385	17.59920878	1.923962343	7.58	1.3	1.93	5.01	-4.3	1.59	0.89
Ag3Y-Ag	0.975707449	-4.449027823	1.250835088	3.0200657	16.97813076	1.760831559	7.58	1.3	1.93	5.01	-4.3	1.59	0.89
Ag3Zr-Ag	0.97502811	-4.331919951	1.225727059	2.755392675	15.40003421	1.791497372	7.58	1.3	1.93	5.01	-4.3	1.59	0.89
Ag3Nb-Ag	0.977199187	-4.06645679	1.195637779	2.621334859	14.86989587	1.858959139	7.58	1.3	1.93	5.01	-4.3	1.59	0.89
Ag3Mo-Ag	0.978942192	-3.970161369	1.17103182	2.568835676	15.00246992	1.973952044	7.58	1.3	1.93	5.01	-4.3	1.59	0.89
Ag3Ru-Ag	0.980374166	-3.720817885	1.128349381	2.322721249	14.17521307	1.981209416	7.58	1.3	1.93	5.01	-4.3	1.59	0.89
Ag3Rh-Ag	0.981044022	-3.594636147	1.109547443	2.310701949	14.44291884	1.995413089	7.58	1.3	1.93	5.01	-4.3	1.59	0.89
Ag3Pd-Ag	0.982699042	-3.714534202	1.107276213	2.299878747	14.83519929	1.981209416	7.58	1.3	1.93	5.01	-4.3	1.59	0.89
Ag3Ag-Ag	0.979916496	-3.976128879	1.130815859	2.414728581	16.55953151	1.93	7.58	1.3	1.93	5.01	-4.3	1.59	0.89
Ag3La-Ag	0.975953711	-4.520591363	1.252763998	3.070436695	17.18699023	1.724742973	7.58	1.3	1.93	5.01	-4.3	1.59	0.89
Ag3Ta-Ag	0.975093568	-4.146718126	1.218580536	2.644294184	15.07085469	1.835118439	7.58	1.3	1.93	5.01	-4.3	1.59	0.89
Ag3W-Ag	0.97720818	-3.946617165	1.203537371	2.533925101	14.59395807	2.009223494	7.58	1.3	1.93	5.01	-4.3	1.59	0.89
Ag3Re-Ag	0.978621741	-3.908594227	1.187472676	2.397832035	14.09608528	1.923962343	7.58	1.3	1.93	5.01	-4.3	1.59	0.89
Ag3Os-Ag	0.979379869	-3.74147352	1.168470584	2.299947458	13.68966187	1.981209416	7.58	1.3	1.93	5.01	-4.3	1.59	0.89
Ag3Ir-Ag	0.979910356	-3.559571376	1.141321384	2.262973806	13.72630321	1.981209416	7.58	1.3	1.93	5.01	-4.3	1.59	0.89
Ag3Pt-Ag	0.981583034	-3.676651455	1.144618876	2.24142356	14.03889501	1.995413089	7.58	1.3	1.93	5.01	-4.3	1.59	0.89
Ag3Au-Ag	0.982875282	-3.943213471	1.157285759	2.249859135	15.05372875	2.038978238	7.58	1.3	1.93	5.01	-4.3	1.59	0.89
Os3Sc-Os	0.711192698	-1.543644342	2.605191994	0.174942204	2.44158311	1.998232077	8.7	1.1	2.2	6.25	-1.5	1.49	1.13
Os3Ti-Os	0.708353529	-1.579781083	2.624059846	0.132580629	2.362131449	2.048529813	8.7	1.1	2.2	6.25	-1.5	1.49	1.13
Os3V-Os	0.70133511	-1.637933286	2.640039215	0.077794688	2.29284969	2.0719328	8.7	1.1	2.2	6.25	-1.5	1.49	1.13
Os3Cr-Os	0.699439522	-1.616011382	2.62621359	0.071937086	2.315179855	2.07950401	8.7	1.1	2.2	6.25	-1.5	1.49	1.13
Os3Mn-Os	0.698905867	-1.611639174	2.616552672	0.069575725	2.330619443	2.051183358	8.7	1.1	2.2	6.25	-1.5	1.49	1.13
Os3Fe-Os	0.694613823	-1.640040876	2.604120917	0.04835669	2.33520544	2.120451593	8.7	1.1	2.2	6.25	-1.5	1.49	1.13
Os3Co-Os	0.691747163	-1.675842274	2.615427754	0.040779293	2.324018564	2.131914162	8.7	1.1	2.2	6.25	-1.5	1.49	1.13
Os3Ni-Os	0.692687325	-1.698220682	2.612267278	0.046199972	2.341978631	2.138675125	8.7	1.1	2.2	6.25	-1.5	1.49	1.13
Os3Cu-Os	0.694440187	-1.673846115	2.589725594	0.044230701	2.37828228	2.13643097	8.7	1.1	2.2	6.25	-1.5	1.49	1.13
Os3Y-Os	0.713383009	-1.533218805	2.555973361	0.188649109	2.493425719	1.95528519	8.7	1.1	2.2	6.25	-1.5	1.49	1.13
Os3Zr-Os	0.70776898	-1.518153114	2.696698729	0.222771191	2.426176649	1.989337516	8.7	1.1	2.2	6.25	-1.5	1.49	1.13
Os3Nb-Os	0.703822576	-1.578421605	2.719685007	0.15526087	2.316324354	2.064249277	8.7	1.1	2.2	6.25	-1.5	1.49	1.13
Os3Mo-Os	0.697115414	-1.639079101	2.729022366	0.101041207	2.259983124	2.191941175	8.7	1.1	2.2	6.25	-1.5	1.49	1.13
Os3Ru-Os	0.689546217	-1.667668533	2.687143233	0.032244771	2.239284939	2.2	8.7	1.1	2.2	6.25	-1.5	1.49	1.13
Os3Rh-Os	0.693667049	-1.702787107	2.672055898	0.02328757	2.255670518	2.215772225	8.7	1.1	2.2	6.25	-1.5	1.49	1.13
Os3Pd-Os	0.695142947	-1.7088001	2.637043111	0.006180166	2.292697228	2.2	8.7	1.1	2.2	6.25	-1.5	1.49	1.13
Os3Ag-Os	0.69516205	-1.679810187	2.617626047	0.000924038	2.378591054	2.143135383	8.7	1.1	2.2	6.25	-1.5	1.49	1.13
Os3La-Os	0.707158872	-1.50398384	2.533267335	0.144463398	2.454990859	1.915211239	8.7	1.1	2.2	6.25	-1.5	1.49	1.13
Os3Ta-Os	0.706194521	-1.587303116	2.750142926	0.17757974	2.344338471	2.037775782	8.7	1.1	2.2	6.25	-1.5	1.49	1.13
Os3W-Os	0.700408064	-1.649983556	2.767270176	0.120128984	2.279126562	2.231107752	8.7	1.1	2.2	6.25	-1.5	1.49	1.13
Os3Re-Os	0.706846374	-1.763857401	2.696323953	0.016962287	2.193039353	2.13643097	8.7	1.1	2.2	6.25	-1.5	1.49	1.13
Os3Os-Os	0.693401301	-1.698299232	2.742329259	0.031061443	2.250668515	2.2	8.7	1.1	2.2	6.25	-1.5	1.49	1.13
Os3Ir-Os	0.6906908	-1.704747302	2.733338846	0.000997154	2.247620459	2.2	8.7	1.1	2.2	6.25	-1.5	1.49	1.13
Os3Pt-Os	0.694266689	-1.72636849	2.706264361	-0.013313439	2.272626726	2.215772225	8.7	1.1	2.2	6.25	-1.5	1.49	1.13
Os3Au-Os	0.69533285	-1.73887012	2.680740699	-0.034192723	2.352075404	2.264148397	8.7	1.1	2.2	6.25	-1.5	1.49	1.13
Ir3Sc-Ir	0.789366344	-1.864956176	2.370629386	0.301653697	2.895136205	1.998232077	9.1	1.57	2.2	6.63	-2.11	1.5	1.08
Ir3Ti-Ir	0.787839104	-1.960097721	2.35095173	0.217683226	2.742011831	2.048529813	9.1	1.57	2.2	6.63	-2.11	1.5	1.08
Ir3V-Ir	0.781975579	-1.982359196	2.342712057	0.16598884	2.702557608	2.0719328	9.1	1.57	2.2	6.63	-2.11	1.5	1.08
Ir3Cr-Ir	0.785295038	-1.982650635	2.329173367	0.176976375	2.75406485	2.07950401	9.1	1.57	2.2	6.63	-2.11	1.5	1.08
Ir3Mn-Ir	0.784801603	-1.967450814	2.3202285	0.161634277	2.768570745	2.051183358	9.1	1.57	2.2	6.63	-2.11	1.5	1.08
Ir3Fe-Ir	0.782468984	-1.962451358	2.295611241	0.121200404	2.7757718	2.120451593	9.1	1.57	2.2	6.63	-2.11	1.5	1.08
Ir3Co-Ir	0.779772233	-1.983590752	2.298043358	0.105756349	2.774945831	2.131914162	9.1	1.57	2.2	6.63	-2.11	1.5	1.08
Ir3Ni-Ir	0.781513138	-1.991232475	2.283437551	0.106673133	2.808093464	2.138675125	9.1	1.57	2.2	6.63	-2.11	1.5	1.08
Ir3Cu-Ir	0.785239675	-1.9435715	2.279326148	0.097384918	2.813347116	2.13643097	9.1	1.57	2.2	6.63	-2.11	1.5	1.08
Ir3Y-Ir	0.785159509	-1.798399852	2.41875215	0.395421327	3.054972726	1.95528519	9.1	1.57	2.2	6.63	-2.11	1.5	1.08
Ir3Zr-Ir	0.787398044	-1.9638058	2.445520406	0.340804251	2.803976444	1.989337516	9.1	1.57	2.2	6.63	-2.11	1.5	1.08
Ir3Nb-Ir	0.78353856	-2.0382607	2.433983391	0.256439893	2.671600338	2.064249277	9.1	1.57	2.2	6.63	-2.11	1.5	1.08
Ir3Mo-Ir	0.780246055	-2.050762694	2.411906477	0.192588918	2.636150785	2.191941175	9.1	1.57	2.2	6.63	-2.11	1.5	1.08
Ir3Ru-Ir	0.779395395	-2.067628954	2.357257473	0.11703816	2.640821686	2.2	9.1	1.57	2.2	6.63	-2.11	1.5	1.08
Ir3Rh-Ir	0.777675596	-2.035107124	2.341627918	0.092747923	2.667348868	2.215772225	9.1	1.57	2.2	6.63	-2.11	1.5	1.08
Ir3Pd-Ir	0.780905475	-2.001317255	2.317709671	0.067122183	2.692187561	2.2	9.1	1.57	2.2	6.63	-2.11	1.5	1.08
Ir3Ag-Ir	0.783522474	-1.94933167	2.312705839	0.050117674	2.760235908	2.143135383	9.1	1.57	2.2	6.63	-2.11	1.5	1.08
Ir3La-Ir	0.788512764	-1.809681385	2.381093222	0.366818385	3.036879898	1.915211239	9.1	1.57	2.2	6.63	-2.11	1.5	1.08
Ir3Ta-Ir	0.783508126	-2.037487715	2.467762778	0.270898373	2.691435257	2.037775782	9.1	1.57	2.2	6.63	-2.11	1.5	1.08
Ir3W-Ir	0.781781399	-2.064663301	2.448691929	0.206118	2.6423509	2.231107752	9.1	1.57	2.2	6.63	-2.11	1.5	1.08
Ir3Re-Ir	0.77915626	-2.09009119	2.434301451	0.149616451	2.617259749	2.13643097	9.1	1.57	2.2	6.63	-2.11	1.5	1.08
Ir3Os-Ir	0.780521255	-2.132585392	2.420745388	0.114376628	2.612000239	2.2	9.1	1.57	2.2	6.63	-2.11	1.5	1.08
Ir3Ir-Ir	0.772868279	-2.132659248	2.401270602	0.084761765	2.624798985	2.2	9.1	1.57	2.2	6.63	-2.11	1.5	1.08
Ir3Pt-Ir	0.778544056	-2.044962393	2.377947751	0.044246827	2.643622967	2.215772225	9.1	1.57	2.2	6.63	-2.11	1.5	1.08
Ir3Au-Ir	0.777584744	-1.976364159	2.352660744	0.011506225	2.709325456	2.264148397	9.1	1.57	2.2	6.63	-2.11	1.5	1.08
Pt3Sc-Pt	0.89245069	-2.208087433	1.93866181	0.563092353	3.663541117	2.056154096	9	2.13	2.28	6.74	-2.25	1.53	1.04
Pt3Ti-Pt	0.892847097	-2.251858572	1.891417971	0.41172109	3.432577778	2.107909794	9	2.13	2.28	6.74	-2.25	1.53	1.04
Pt3V-Pt	0.88454218	-2.182699719	1.878576682	0.381616968	3.436265985	2.131991154	9	2.13	2.28	6.74	-2.25	1.53	1.04
Pt3Cr-Pt	0.88823325	-2.135272537	1.875829626	0.395340248	3.526572723	2.139781829	9	2.13	2.28	6.74	-2.25	1.53	1.04
Pt3Mn-Pt	0.883202103	-2.159249134	1.851541668	0.316369827	3.468763297	2.110640257	9	2.13	2.28	6.74	-2.25	1.53	1.04
Pt3Fe-Pt	0.891633361	-2.148441932	1.847783088	0.293555852	3.505438597	2.181916344	9	2.13	2.28	6.74	-2.25	1.53	1.04
Pt3Co-Pt	0.890225734	-2.119840042	1.839567997	0.278975603	3.483716835	2.193711174	9	2.13	2.28	6.74	-2.25	1.53	1.04
Pt3Ni-Pt	0.884461714	-2.047320354	1.831345211	0.264307482	3.486906625	2.200668115	9	2.13	2.28	6.74	-2.25	1.53	1.04
Pt3Cu-Pt	0.889205543	-2.026814467	1.828679289	0.255966311	3.481259788	2.198358909	9	2.13	2.28	6.74	-2.25	1.53	1.04
Pt3Y-Pt	0.890905278	-2.233448149	2.012529488	0.732251333	3.967912958	2.011962323	9	2.13	2.28	6.74	-2.25	1.53	1.04
Pt3Zr-Pt	0.887825077	-2.29876623	2.008546538	0.578373909	3.53151883	2.047001712	9	2.13	2.28	6.74	-2.25	1.53	1.04
Pt3Nb-Pt	0.884307145	-2.283002164	1.972199751	0.459480792	3.374288117	2.124084913	9	2.13	2.28	6.74	-2.25	1.53	1.04
Pt3Mo-Pt	0.88098985	-2.269337954	1.93268616	0.379790724	3.31388551	2.255478169	9	2.13	2.28	6.74	-2.25	1.53	1.04
Pt3Ru-Pt	0.880462227	-2.162621652	1.884858059	0.290692671	3.291454355	2.263770592	9	2.13	2.28	6.74	-2.25	1.53	1.04
Pt3Rh-Pt	0.880241873	-2.101103778	1.867169191	0.272545674	3.331638792	2.28	9	2.13	2.28	6.74	-2.25	1.53	1.04
Pt3Pd-Pt	0.88390854	-2.075359854	1.860913814	0.235667113	3.304815813	2.263770592	9	2.13	2.28	6.74	-2.25	1.53	1.04
Pt3Ag-Pt	0.889024411	-2.071451865	1.870567907	0.204913833	3.38012315	2.205257661	9	2.13	2.28	6.74	-2.25	1.53	1.04
Pt3La-Pt	0.889904931	-2.25488653	2.003469348	0.74261538	3.989670423	1.970726764	9	2.13	2.28	6.74	-2.25	1.53	1.04
Pt3Ta-Pt	0.885240557	-2.272904124	2.007119591	0.471921197	3.431770733	2.096844039	9	2.13	2.28	6.74	-2.25	1.53	1.04
Pt3W-Pt	0.882674514	-2.301759377	1.976350702	0.38319695	3.350377243	2.295780053	9	2.13	2.28	6.74	-2.25	1.53	1.04
Pt3Re-Pt	0.882024702	-2.275537641	1.948032683	0.311307244	3.286439705	2.198358909	9	2.13	2.28	6.74	-2.25	1.53	1.04
Pt3Os-Pt	0.877406188	-2.202052451	1.930069806	0.265549782	3.256243153	2.263770592	9	2.13	2.28	6.74	-2.25	1.53	1.04
Pt3Ir-Pt	0.877893704	-2.137588504	1.91113683	0.236222225	3.261727543	2.263770592	9	2.13	2.28	6.74	-2.25	1.53	1.04
Pt3Pt-Pt	0.877249873	-2.116947967	1.897980076	0.208376842	3.249394845	2.28	9	2.13	2.28	6.74	-2.25	1.53	1.04
Pt3Au-Pt	0.888296867	-2.120012637	1.912871269	0.158831782	3.26396517	2.329778435	9	2.13	2.28	6.74	-2.25	1.53	1.04
Au3Sc-Au	0.965742327	-3.650839822	1.459111768	1.493478939	7.905161725	2.241685873	9.23	2.31	2.54	6.01	-3.56	1.59	1.01
Au3Ti-Au	0.967338386	-3.570325412	1.415980377	1.350673019	7.688985283	2.298111614	9.23	2.31	2.54	6.01	-3.56	1.59	1.01
Au3V-Au	0.968679699	-3.43656272	1.425243331	1.399176431	7.962409262	2.324365893	9.23	2.31	2.54	6.01	-3.56	1.59	1.01
Au3Cr-Au	0.970686373	-3.412474643	1.429624074	1.374624878	7.983869759	2.33285954	9.23	2.31	2.54	6.01	-3.56	1.59	1.01
Au3Mn-Au	0.969181946	-3.464752374	1.434135173	1.311944889	7.84268806	2.301088452	9.23	2.31	2.54	6.01	-3.56	1.59	1.01
Au3Fe-Au	0.971009324	-3.386942428	1.407420728	1.260478509	7.803231632	2.378795954	9.23	2.31	2.54	6.01	-3.56	1.59	1.01
Au3Co-Au	0.970427184	-3.279544812	1.399032635	1.217114416	7.713895815	2.39165506	9.23	2.31	2.54	6.01	-3.56	1.59	1.01
Au3Ni-Au	0.970887231	-3.178951025	1.394084411	1.175151875	7.592292013	2.399239743	9.23	2.31	2.54	6.01	-3.56	1.59	1.01
Au3Cu-Au	0.971881485	-3.301355077	1.406858344	1.195617235	7.682688496	2.396722172	9.23	2.31	2.54	6.01	-3.56	1.59	1.01
Au3Y-Au	0.963187637	-3.814642981	1.52378413	1.752734301	8.695279921	2.193506569	9.23	2.31	2.54	6.01	-3.56	1.59	1.01
Au3Zr-Au	0.96151321	-3.778982405	1.518412431	1.544049085	7.858261239	2.231707647	9.23	2.31	2.54	6.01	-3.56	1.59	1.01
Au3Nb-Au	0.961227719	-3.538648907	1.476194743	1.393332209	7.398191216	2.315746252	9.23	2.31	2.54	6.01	-3.56	1.59	1.01
Au3Mo-Au	0.965409019	-3.388277356	1.461919986	1.320887528	7.236406662	2.458995441	9.23	2.31	2.54	6.01	-3.56	1.59	1.01
Au3Ru-Au	0.967438954	-3.224987941	1.427896571	1.148332912	6.900188586	2.468036109	9.23	2.31	2.54	6.01	-3.56	1.59	1.01
Au3Rh-Au	0.967864162	-3.051696924	1.409831498	1.109052162	6.887678741	2.485729936	9.23	2.31	2.54	6.01	-3.56	1.59	1.01
Au3Pd-Au	0.971288632	-3.133226381	1.409401265	1.061010235	6.864808748	2.468036109	9.23	2.31	2.54	6.01	-3.56	1.59	1.01
Au3Ag-Au	0.972550302	-3.344367205	1.417414788	1.105207967	7.445240829	2.404243414	9.23	2.31	2.54	6.01	-3.56	1.59	1.01
Au3La-Au	0.962885275	-3.999273941	1.553264011	1.868994402	9.005378216	2.148550225	9.23	2.31	2.54	6.01	-3.56	1.59	1.01
Au3Ta-Au	0.960590122	-3.633469039	1.483999039	1.453641856	7.806632721	2.286047369	9.23	2.31	2.54	6.01	-3.56	1.59	1.01
Au3W-Au	0.962375401	-3.423533709	1.484989332	1.325662972	7.284311278	2.502933862	9.23	2.31	2.54	6.01	-3.56	1.59	1.01
Au3Re-Au	0.96538744	-3.369637273	1.475097576	1.212200234	6.953753446	2.396722172	9.23	2.31	2.54	6.01	-3.56	1.59	1.01
Au3Os-Au	0.965498226	-3.24048473	1.45969424	1.14261969	6.76432531	2.468036109	9.23	2.31	2.54	6.01	-3.56	1.59	1.01
Au3Ir-Au	0.966590032	-3.082922108	1.437025064	1.103283571	6.717546099	2.468036109	9.23	2.31	2.54	6.01	-3.56	1.59	1.01
Au3Pt-Au	0.96995333	-3.155408644	1.447830527	1.054850261	6.670134834	2.485729936	9.23	2.31	2.54	6.01	-3.56	1.59	1.01
Au3Au-Au	0.968676482	-3.329924452	1.452737489	1.015633156	6.881269606	2.54	9.23	2.31	2.54	6.01	-3.56	1.59	1.01
Co2Sc2-Co	0.798757215	-1.117581027	1.679326761	0.78704669	4.035720498	1.701729325	7.88	0.66	1.88	5.76	-1.17	1.39	0.76
Co2V2-Co	0.786936351	-1.315728369	1.703354812	0.530623122	3.452764769	1.799244077	7.88	0.66	1.88	5.76	-1.17	1.39	0.76
Co2Cr2-Co	0.7794407	-1.378541629	1.696880166	0.428864635	3.342228764	1.809369034	7.88	0.66	1.88	5.76	-1.17	1.39	0.76
Co2Fe2-Co	0.78681117	-1.27023847	1.729192721	0.346838465	3.331234437	1.864471587	7.88	0.66	1.88	5.76	-1.17	1.39	0.76
Co2Co2-Co	0.775102109	-1.196786399	1.525308788	0.200228834	3.98851329	1.88	7.88	0.66	1.88	5.76	-1.17	1.39	0.76
Co2Ni2-Co	0.780678345	-1.458230717	1.738099481	0.309580276	3.249638097	1.889180235	7.88	0.66	1.88	5.76	-1.17	1.39	0.76
Co2Cu2-Co	0.779754117	-1.380138241	1.718817178	0.231151949	3.395132152	1.88613132	7.88	0.66	1.88	5.76	-1.17	1.39	0.76
Co2Nb2-Co	0.789448994	-1.294457273	1.807608411	0.553341292	3.495178471	1.788989273	7.88	0.66	1.88	5.76	-1.17	1.39	0.76
Co2Mo2-Co	0.786997595	-1.361025022	1.82286724	0.398430853	3.391103637	1.962051644	7.88	0.66	1.88	5.76	-1.17	1.39	0.76
Co2Ru2-Co	0.773730791	-1.411780629	1.859304831	0.162199616	3.026184806	1.9731605	7.88	0.66	1.88	5.76	-1.17	1.39	0.76
Co2Rh2-Co	0.776677253	-1.471377777	1.86087258	0.123444895	3.055119704	1.994965488	7.88	0.66	1.88	5.76	-1.17	1.39	0.76
Co2Pd2-Co	0.779654011	-1.480171697	1.844581822	0.054921237	3.107324358	1.9731605	7.88	0.66	1.88	5.76	-1.17	1.39	0.76
Co2Ta2-Co	0.798577108	-1.373491162	1.857463584	0.56284865	3.538958773	1.753813924	7.88	0.66	1.88	5.76	-1.17	1.39	0.76
Co2W2-Co	0.792630187	-1.420136506	1.898808063	0.399797938	3.515375002	2.028037123	7.88	0.66	1.88	5.76	-1.17	1.39	0.76
Co2Re2-Co	0.789390891	-1.407083129	1.8695947	0.117770473	3.383280376	1.887974612	7.88	0.66	1.88	5.76	-1.17	1.39	0.76
Co2Os2-Co	0.778985867	-1.420929528	1.902547614	0.022131344	3.428068841	2.001998657	7.88	0.66	1.88	5.76	-1.17	1.39	0.76
Co2Ir2-Co	0.777553726	-1.487335401	1.9530058	-0.041873184	3.266357126	1.981129173	7.88	0.66	1.88	5.76	-1.17	1.39	0.76
Co2Pt2-Co	0.778115838	-1.501908656	1.939005465	-0.144008877	3.341970611	1.994965488	7.88	0.66	1.88	5.76	-1.17	1.39	0.76
Ni2Sc2-Ni	0.882994976	-1.590332895	1.512932271	1.265508588	5.653053096	1.720483282	7.64	1.16	1.91	5.77	-1.29	1.38	0.71
Ni2Ti2-Ni	0.884263672	-1.657356667	1.501019278	1.026120242	5.045407203	1.766154811	7.64	1.16	1.91	5.77	-1.29	1.38	0.71
Ni2V2-Ni	0.875898236	-1.581553066	1.464739376	0.839068203	4.783182246	1.79264817	7.64	1.16	1.91	5.77	-1.29	1.38	0.71
Ni2Cr2-Ni	0.878886769	-1.431330505	1.448107668	0.73011663	4.799956297	1.815008738	7.64	1.16	1.91	5.77	-1.29	1.38	0.71
Ni2Mn2-Ni	0.875153858	-1.461550922	1.388044149	0.610703748	4.917872726	1.756922884	7.64	1.16	1.91	5.77	-1.29	1.38	0.71
Ni2Fe2-Ni	0.880378191	-1.519112311	1.422764103	0.539414256	4.910158319	1.880512287	7.64	1.16	1.91	5.77	-1.29	1.38	0.71
Ni2Co2-Ni	0.872689352	-1.471800108	1.40102129	0.466381744	4.874037998	1.899035918	7.64	1.16	1.91	5.77	-1.29	1.38	0.71
Ni2Ni2-Ni	0.867716853	-1.405790032	1.374056827	0.454568849	4.933961105	1.91	7.64	1.16	1.91	5.77	-1.29	1.38	0.71
Ni2Cu2-Ni	0.881589338	-1.269435211	1.353327018	0.306397269	5.171727353	1.9059937	7.64	1.16	1.91	5.77	-1.29	1.38	0.71
Ni2Zr2-Ni	0.877250792	-1.717795466	1.594195759	1.130252957	5.106693459	1.708715501	7.64	1.16	1.91	5.77	-1.29	1.38	0.71
Ni2Nb2-Ni	0.875442663	-1.760621618	1.633655035	0.949900073	4.747499672	1.779377167	7.64	1.16	1.91	5.77	-1.29	1.38	0.71
Ni2Mo2-Ni	0.872912622	-1.691817971	1.600650893	0.695590662	4.47067037	2.006326091	7.64	1.16	1.91	5.77	-1.29	1.38	0.71
Ni2Ru2-Ni	0.871314058	-1.517801284	1.518250978	0.283089759	4.285196356	2.021106006	7.64	1.16	1.91	5.77	-1.29	1.38	0.71
Ni2Rh2-Ni	0.871310489	-1.487753712	1.503395814	0.211455506	4.395525774	2.050189284	7.64	1.16	1.91	5.77	-1.29	1.38	0.71
Ni2Pd2-Ni	0.879216459	-1.412787866	1.472332573	0.064112077	4.580443756	2.021106006	7.64	1.16	1.91	5.77	-1.29	1.38	0.71
Ni2Ta2-Ni	0.875480734	-1.817638638	1.683443999	0.91550443	4.724746097	1.734029669	7.64	1.16	1.91	5.77	-1.29	1.38	0.71
Ni2W2-Ni	0.872600193	-1.703164853	1.671916976	0.695663099	4.655443273	2.078666522	7.64	1.16	1.91	5.77	-1.29	1.38	0.71
Ni2Re2-Ni	0.871799722	-1.613737406	1.622043719	0.407875927	4.519111287	1.9059937	7.64	1.16	1.91	5.77	-1.29	1.38	0.71
Ni2Os2-Ni	0.87434547	-1.552506334	1.58509424	0.145384774	4.558868064	2.021106006	7.64	1.16	1.91	5.77	-1.29	1.38	0.71
Ni2Ir2-Ni	0.873840975	-1.551233447	1.602101471	-0.002633632	4.524211083	2.021106006	7.64	1.16	1.91	5.77	-1.29	1.38	0.71
Ni2Pt2-Ni	0.870145085	-1.42511683	1.577528644	-0.200151608	4.715889847	2.050189284	7.64	1.16	1.91	5.77	-1.29	1.38	0.71
Cu2Sc2-Cu	0.968041106	-3.084208992	1.177002355	2.543387383	13.49433126	1.66214047	7.73	1.24	1.9	5.3	-2.67	1.41	0.67
Cu2Ti2-Cu	0.967629085	-3.003667856	1.141383426	2.218182793	11.79619854	1.746869447	7.73	1.24	1.9	5.3	-2.67	1.41	0.67
Cu2V2-Cu	0.964550668	-2.791715748	1.136064732	1.93514433	10.43131265	1.787010903	7.73	1.24	1.9	5.3	-2.67	1.41	0.67
Cu2Cr2-Cu	0.969102381	-2.707347931	1.12805534	1.833876132	10.61114486	1.800094876	7.73	1.24	1.9	5.3	-2.67	1.41	0.67
Cu2Mn2-Cu	0.968919073	-2.674979635	1.120092053	1.622656846	10.16759113	1.751397961	7.73	1.24	1.9	5.3	-2.67	1.41	0.67
Cu2Fe2-Cu	0.970221566	-2.58101267	1.075632219	1.416254526	9.794137262	1.871684296	7.73	1.24	1.9	5.3	-2.67	1.41	0.67
Cu2Co2-Cu	0.969653007	-2.359335127	1.048505524	1.250919523	9.412973493	1.891974594	7.73	1.24	1.9	5.3	-2.67	1.41	0.67
Cu2Ni2-Cu	0.969488617	-2.191567808	1.040331849	1.197109975	9.262315789	1.903993702	7.73	1.24	1.9	5.3	-2.67	1.41	0.67
Cu2Cu2-Cu	0.972215011	-2.383479033	1.049691457	1.120221494	9.923558007	1.9	7.73	1.24	1.9	5.3	-2.67	1.41	0.67
Cu2Zr2-Cu	0.966090976	-3.11015793	1.240252769	2.321586658	11.67862525	1.647376312	7.73	1.24	1.9	5.3	-2.67	1.41	0.67
Cu2Nb2-Cu	0.963144532	-3.143724157	1.2717165	2.088384952	10.42115073	1.773781633	7.73	1.24	1.9	5.3	-2.67	1.41	0.67
Cu2Mo2-Cu	0.962250511	-2.916874208	1.245027376	1.737325336	9.052218034	2.00001688	7.73	1.24	1.9	5.3	-2.67	1.41	0.67
Cu2Ru2-Cu	0.965364735	-2.402219579	1.16885483	1.05858195	7.284707427	2.014750318	7.73	1.24	1.9	5.3	-2.67	1.41	0.67
Cu2Rh2-Cu	0.966541461	-2.324950612	1.160029769	0.907284369	7.11679038	2.043742138	7.73	1.24	1.9	5.3	-2.67	1.41	0.67
Cu2Pd2-Cu	0.970406285	-2.144846701	1.13286217	0.643474804	7.098346488	2.014750318	7.73	1.24	1.9	5.3	-2.67	1.41	0.67
Cu2Ag2-Cu	0.975243157	-2.500554803	1.145383529	0.376790644	8.762085409	1.911943632	7.73	1.24	1.9	5.3	-2.67	1.41	0.67
Cu2Ta2-Cu	0.96203733	-3.224595354	1.306709531	2.112438628	10.88405694	1.728576738	7.73	1.24	1.9	5.3	-2.67	1.41	0.67
Cu2Os2-Cu	0.963569929	-2.498740221	1.230084745	0.959698899	7.239277463	2.014750318	7.73	1.24	1.9	5.3	-2.67	1.41	0.67
Cu2Ir2-Cu	0.964215376	-2.431779787	1.232803985	0.675982046	6.860357108	2.014750318	7.73	1.24	1.9	5.3	-2.67	1.41	0.67
Cu2Pt2-Cu	0.96667966	-2.316733323	1.227669557	0.403386376	6.668708637	2.043742138	7.73	1.24	1.9	5.3	-2.67	1.41	0.67
Cu2Au2-Cu	0.974012681	-2.527829566	1.242793793	0.028658583	7.677665541	2.133956918	7.73	1.24	1.9	5.3	-2.67	1.41	0.67
Ru2Sc2-Ru	0.758572969	-1.184527618	1.919377084	0.517557173	2.922712178	1.814968834	7.36	1.05	2.2	5.73	-1.41	1.48	1.05
Ru2Ti2-Ru	0.749054978	-1.254029889	1.947699832	0.368498883	2.638229739	1.907488362	7.36	1.05	2.2	5.73	-1.41	1.48	1.05
Ru2V2-Ru	0.731392105	-1.303419898	1.991480598	0.249066219	2.512474695	1.951320694	7.36	1.05	2.2	5.73	-1.41	1.48	1.05
Ru2Cr2-Ru	0.72761261	-1.3843161	1.977221075	0.192631067	2.55627626	1.965607695	7.36	1.05	2.2	5.73	-1.41	1.48	1.05
Ru2Mn2-Ru	0.722816242	-1.397831911	1.969749322	0.183702376	2.657903797	1.912433258	7.36	1.05	2.2	5.73	-1.41	1.48	1.05
Ru2Fe2-Ru	0.731513567	-1.30892286	1.927683406	0.161572989	2.773417836	2.043779527	7.36	1.05	2.2	5.73	-1.41	1.48	1.05
Ru2Co2-Ru	0.720411167	-1.309478457	1.937682678	0.137556654	2.787991068	2.065935451	7.36	1.05	2.2	5.73	-1.41	1.48	1.05
Ru2Ni2-Ru	0.718852054	-1.309609771	1.922714496	0.14179721	2.828547493	2.079059677	7.36	1.05	2.2	5.73	-1.41	1.48	1.05
Ru2Cu2-Ru	0.72298782	-1.229865712	1.909260704	0.094989639	2.929011562	2.074698767	7.36	1.05	2.2	5.73	-1.41	1.48	1.05
Ru2Y2-Ru	0.756497786	-1.2065758	2.017826197	0.638219516	3.105683675	1.737790988	7.36	1.05	2.2	5.73	-1.41	1.48	1.05
Ru2Zr2-Ru	0.748712274	-1.282438936	2.107023506	0.547920089	2.832041292	1.79884716	7.36	1.05	2.2	5.73	-1.41	1.48	1.05
Ru2Nb2-Ru	0.736017801	-1.343237386	2.156836004	0.416721715	2.623844243	1.936875036	7.36	1.05	2.2	5.73	-1.41	1.48	1.05
Ru2Mo2-Ru	0.721289012	-1.383248516	2.169652686	0.302219636	2.529218268	2.183911871	7.36	1.05	2.2	5.73	-1.41	1.48	1.05
Ru2Ru2-Ru	0.705151956	-1.408756268	2.07756513	0.107570537	2.469496521	2.2	7.36	1.05	2.2	5.73	-1.41	1.48	1.05
Ru2Rh2-Ru	0.72141001	-1.426799867	2.050302009	0.077636387	2.539303774	2.231657523	7.36	1.05	2.2	5.73	-1.41	1.48	1.05
Ru2Pd2-Ru	0.715509356	-1.319199989	2.001609781	-0.013163998	2.619800209	2.2	7.36	1.05	2.2	5.73	-1.41	1.48	1.05
Ru2Ag2-Ru	0.726789175	-1.267765292	1.994809526	-0.118773447	3.008386597	2.087740577	7.36	1.05	2.2	5.73	-1.41	1.48	1.05
Ru2La2-Ru	0.755687056	-1.329560412	2.06122762	0.497652954	3.385573726	1.667288223	7.36	1.05	2.2	5.73	-1.41	1.48	1.05
Ru2Ta2-Ru	0.738797345	-1.36095998	2.214638667	0.439186066	2.740428146	1.887513698	7.36	1.05	2.2	5.73	-1.41	1.48	1.05
Ru2W2-Ru	0.727452132	-1.420117376	2.250497755	0.318091955	2.632418267	2.262655365	7.36	1.05	2.2	5.73	-1.41	1.48	1.05
Ru2Re2-Ru	0.746488351	-1.629336617	2.077918734	-0.02103169	2.27449559	2.074698767	7.36	1.05	2.2	5.73	-1.41	1.48	1.05
Ru2Os2-Ru	0.716592165	-1.457983796	2.192109526	0.054287285	2.536227627	2.2	7.36	1.05	2.2	5.73	-1.41	1.48	1.05
Ru2Ir2-Ru	0.718096689	-1.472767907	2.172521269	-0.018557722	2.566908473	2.2	7.36	1.05	2.2	5.73	-1.41	1.48	1.05
Ru2Pt2-Ru	0.721520619	-1.45480278	2.13965383	-0.087729488	2.633892208	2.231657523	7.36	1.05	2.2	5.73	-1.41	1.48	1.05
Ru2Au2-Ru	0.724222541	-1.348354597	2.102861265	-0.234523578	2.980693729	2.330167256	7.36	1.05	2.2	5.73	-1.41	1.48	1.05
Rh2Sc2-Rh	0.823547329	-1.579696198	1.937403724	0.873777073	3.761612144	1.854284942	7.46	1.14	2.28	5.91	-1.73	1.49	0.99
Rh2Ti2-Rh	0.823580188	-1.716576821	1.900082707	0.67734653	3.412252833	1.948808641	7.46	1.14	2.28	5.91	-1.73	1.49	0.99
Rh2V2-Rh	0.809656265	-1.702100216	1.882426228	0.538585361	3.258736931	1.993590475	7.46	1.14	2.28	5.91	-1.73	1.49	0.99
Rh2Cr2-Rh	0.815390958	-1.675923925	1.862432114	0.55256655	3.400316784	2.008186963	7.46	1.14	2.28	5.91	-1.73	1.49	0.99
Rh2Mn2-Rh	0.805138814	-1.693089923	1.815121264	0.427852017	3.38127427	1.953860655	7.46	1.14	2.28	5.91	-1.73	1.49	0.99
Rh2Fe2-Rh	0.815535145	-1.557803865	1.795400131	0.38331657	3.502058873	2.088052164	7.46	1.14	2.28	5.91	-1.73	1.49	0.99
Rh2Co2-Rh	0.812881169	-1.578320794	1.777151983	0.34440312	3.469204226	2.110688033	7.46	1.14	2.28	5.91	-1.73	1.49	0.99
Rh2Ni2-Rh	0.802544859	-1.537857991	1.749806328	0.331614491	3.510416411	2.124096558	7.46	1.14	2.28	5.91	-1.73	1.49	0.99
Rh2Cu2-Rh	0.809884715	-1.451412439	1.742270678	0.282378694	3.589980349	2.119641181	7.46	1.14	2.28	5.91	-1.73	1.49	0.99
Rh2Y2-Rh	0.826315833	-1.678695137	1.984918098	0.965779047	3.932192856	1.775435259	7.46	1.14	2.28	5.91	-1.73	1.49	0.99
Rh2Zr2-Rh	0.818617548	-1.772012253	2.043364004	0.823388645	3.493624047	1.837814038	7.46	1.14	2.28	5.91	-1.73	1.49	0.99
Rh2Nb2-Rh	0.809632236	-1.801406545	2.072971726	0.679263158	3.250745527	1.978831893	7.46	1.14	2.28	5.91	-1.73	1.49	0.99
Rh2Mo2-Rh	0.802073522	-1.799269852	2.026601124	0.510228504	3.044589181	2.231220074	7.46	1.14	2.28	5.91	-1.73	1.49	0.99
Rh2Ru2-Rh	0.797851017	-1.723486557	1.902191412	0.305594305	3.053165725	2.247656707	7.46	1.14	2.28	5.91	-1.73	1.49	0.99
Rh2Rh2-Rh	0.790923346	-1.695593342	1.876600066	0.260073181	3.119721635	2.28	7.46	1.14	2.28	5.91	-1.73	1.49	0.99
Rh2Pd2-Rh	0.800810815	-1.550321587	1.825399189	0.169187357	3.181386817	2.247656707	7.46	1.14	2.28	5.91	-1.73	1.49	0.99
Rh2Ag2-Rh	0.810671294	-1.469584292	1.8297143	0.05425544	3.554943362	2.132965504	7.46	1.14	2.28	5.91	-1.73	1.49	0.99
Rh2La2-Rh	0.831231948	-1.816294685	2.013184468	0.864537491	4.186520774	1.703405253	7.46	1.14	2.28	5.91	-1.73	1.49	0.99
Rh2Ta2-Rh	0.810295501	-1.815372429	2.119675395	0.676162579	3.310910191	1.928401283	7.46	1.14	2.28	5.91	-1.73	1.49	0.99
Rh2W2-Rh	0.804828489	-1.832621135	2.110168922	0.526022296	3.139747306	2.311669321	7.46	1.14	2.28	5.91	-1.73	1.49	0.99
Rh2Re2-Rh	0.806680217	-1.819259115	2.054453102	0.352756991	3.013565061	2.119641181	7.46	1.14	2.28	5.91	-1.73	1.49	0.99
Rh2Os2-Rh	0.799958498	-1.800879664	2.014252766	0.248924265	3.035158512	2.247656707	7.46	1.14	2.28	5.91	-1.73	1.49	0.99
Rh2Ir2-Rh	0.80270964	-1.771902453	1.980273102	0.157539412	3.073450638	2.247656707	7.46	1.14	2.28	5.91	-1.73	1.49	0.99
Rh2Pt2-Rh	0.796928657	-1.634047757	1.942445838	0.056825768	3.119007931	2.28	7.46	1.14	2.28	5.91	-1.73	1.49	0.99
Rh2Au2-Rh	0.810785964	-1.582074333	1.928149607	-0.073160711	3.4316784	2.380643664	7.46	1.14	2.28	5.91	-1.73	1.49	0.99
Pd2Sc2-Pd	0.930050997	-2.478208299	1.579919954	1.410167615	5.922456859	1.814968834	8.34	0.56	2.2	5.9	-1.83	1.52	0.94
Pd2Ti2-Pd	0.931132837	-2.380354253	1.476654868	1.08405236	5.121217274	1.907488362	8.34	0.56	2.2	5.9	-1.83	1.52	0.94
Pd2V2-Pd	0.92323651	-2.177060395	1.472853076	0.974735359	4.965950294	1.951320694	8.34	0.56	2.2	5.9	-1.83	1.52	0.94
Pd2Cr2-Pd	0.92754345	-1.938335469	1.45691936	0.937657122	5.090400203	1.965607695	8.34	0.56	2.2	5.9	-1.83	1.52	0.94
Pd2Mn2-Pd	0.91765334	-2.019803187	1.417983384	0.756744593	4.832920805	1.912433258	8.34	0.56	2.2	5.9	-1.83	1.52	0.94
Pd2Fe2-Pd	0.929695697	-1.955345175	1.409171356	0.657837011	4.885635435	2.043779527	8.34	0.56	2.2	5.9	-1.83	1.52	0.94
Pd2Co2-Pd	0.921607223	-1.783791371	1.357874407	0.635302506	4.80504415	2.065935451	8.34	0.56	2.2	5.9	-1.83	1.52	0.94
Pd2Ni2-Pd	0.925825233	-1.748001259	1.368464446	0.585838952	4.797878991	2.079059677	8.34	0.56	2.2	5.9	-1.83	1.52	0.94
Pd2Cu2-Pd	0.928337326	-1.607842831	1.353261052	0.526400847	4.789582939	2.074698767	8.34	0.56	2.2	5.9	-1.83	1.52	0.94
Pd2Y2-Pd	0.92470304	-2.700611268	1.641519973	1.61802419	6.506345716	1.737790988	8.34	0.56	2.2	5.9	-1.83	1.52	0.94
Pd2Zr2-Pd	0.920851339	-2.602350841	1.680477818	1.436415759	5.8832134	1.79884716	8.34	0.56	2.2	5.9	-1.83	1.52	0.94
Pd2Nb2-Pd	0.919090628	-2.464561987	1.624736153	1.172186543	5.117195045	1.936875036	8.34	0.56	2.2	5.9	-1.83	1.52	0.94
Pd2Mo2-Pd	0.912960809	-2.277577763	1.571191062	0.896631198	4.452650355	2.183911871	8.34	0.56	2.2	5.9	-1.83	1.52	0.94
Pd2Ru2-Pd	0.913661434	-1.957161787	1.479186588	0.570913883	4.024440084	2.2	8.34	0.56	2.2	5.9	-1.83	1.52	0.94
Pd2Rh2-Pd	0.916904466	-1.860062396	1.458007193	0.519962539	4.110874873	2.231657523	8.34	0.56	2.2	5.9	-1.83	1.52	0.94
Pd2Pd2-Pd	0.917306575	-1.711053007	1.426094341	0.39040219	3.983247775	2.2	8.34	0.56	2.2	5.9	-1.83	1.52	0.94
Pd2Ag2-Pd	0.927443958	-1.656219297	1.448741667	0.184845935	4.49692555	2.087740577	8.34	0.56	2.2	5.9	-1.83	1.52	0.94
Pd2La2-Pd	0.928003729	-2.902478806	1.682905489	1.537119993	7.042967714	1.667288223	8.34	0.56	2.2	5.9	-1.83	1.52	0.94
Pd2Ta2-Pd	0.916640842	-2.478812388	1.691861451	1.181273628	5.309926479	1.887513698	8.34	0.56	2.2	5.9	-1.83	1.52	0.94
Pd2W2-Pd	0.913070533	-2.407703825	1.666221622	0.905922928	4.595995488	2.262655365	8.34	0.56	2.2	5.9	-1.83	1.52	0.94
Pd2Re2-Pd	0.912790639	-2.268478306	1.615338913	0.65849267	4.159527529	2.074698767	8.34	0.56	2.2	5.9	-1.83	1.52	0.94
Pd2Os2-Pd	0.911677325	-2.104888873	1.570715401	0.474106554	3.970118129	2.2	8.34	0.56	2.2	5.9	-1.83	1.52	0.94
Pd2Ir2-Pd	0.911512366	-1.925054488	1.540687594	0.353601149	3.948468508	2.2	8.34	0.56	2.2	5.9	-1.83	1.52	0.94
Pd2Pt2-Pd	0.914150511	-1.792938807	1.522816617	0.242184408	3.890472416	2.231657523	8.34	0.56	2.2	5.9	-1.83	1.52	0.94
Pd2Au2-Pd	0.925435511	-1.728459175	1.538233393	0.030050444	4.180795981	2.330167256	8.34	0.56	2.2	5.9	-1.83	1.52	0.94
Ag2Sc2-Ag	0.976548829	-4.351067195	1.21372167	3.355653937	18.60895211	1.677837701	7.58	1.3	1.93	5.01	-4.3	1.59	0.89
Ag2Ti2-Ag	0.978488613	-4.163672197	1.127931949	3.061077684	17.48416321	1.763366857	7.58	1.3	1.93	5.01	-4.3	1.59	0.89
Ag2V2-Ag	0.978255613	-4.083212839	1.164743301	3.142381301	18.17501585	1.803887409	7.58	1.3	1.93	5.01	-4.3	1.59	0.89
Ag2Cr2-Ag	0.980584194	-4.105515657	1.161354293	3.180206514	19.01253953	1.817094947	7.58	1.3	1.93	5.01	-4.3	1.59	0.89
Ag2Mn2-Ag	0.978939233	-4.102853909	1.156749265	2.993706917	18.27463095	1.767938139	7.58	1.3	1.93	5.01	-4.3	1.59	0.89
Ag2Fe2-Ag	0.980981898	-3.976525099	1.112792019	2.926381272	18.48303249	1.889360456	7.58	1.3	1.93	5.01	-4.3	1.59	0.89
Ag2Co2-Ag	0.980922932	-3.81172053	1.096400807	2.858021999	18.3930556	1.909842375	7.58	1.3	1.93	5.01	-4.3	1.59	0.89
Ag2Ni2-Ag	0.981313395	-3.676353838	1.082135777	2.815415185	18.29042322	1.921974991	7.58	1.3	1.93	5.01	-4.3	1.59	0.89
Ag2Cu2-Ag	0.982497672	-3.911946202	1.104016532	2.83317393	18.65439924	1.917943573	7.58	1.3	1.93	5.01	-4.3	1.59	0.89
Ag2Y2-Ag	0.972797918	-4.567791327	1.348456339	3.522163828	19.01590448	1.606491077	7.58	1.3	1.93	5.01	-4.3	1.59	0.89
Ag2Zr2-Ag	0.971733222	-4.389847958	1.336897043	3.2312564	16.75326879	1.662934111	7.58	1.3	1.93	5.01	-4.3	1.59	0.89
Ag2Nb2-Ag	0.97173618	-4.172780177	1.276777515	2.922601156	14.88137106	1.790533202	7.58	1.3	1.93	5.01	-4.3	1.59	0.89
Ag2Mo2-Ag	0.974283357	-3.91169196	1.222640378	2.718027771	14.00517595	2.018905011	7.58	1.3	1.93	5.01	-4.3	1.59	0.89
Ag2Ru2-Ag	0.977621098	-3.617011823	1.137066004	2.402670737	13.28134494	2.033777591	7.58	1.3	1.93	5.01	-4.3	1.59	0.89
Ag2Rh2-Ag	0.979089893	-3.496682609	1.106130973	2.398478145	13.79083616	2.06304321	7.58	1.3	1.93	5.01	-4.3	1.59	0.89
Ag2Pd2-Ag	0.981926368	-3.470172202	1.091767681	2.234333437	13.42847835	2.033777591	7.58	1.3	1.93	5.01	-4.3	1.59	0.89
Ag2Ag2-Ag	0.979916496	-3.976128879	1.130815859	2.414728581	16.55953151	1.93	7.58	1.3	1.93	5.01	-4.3	1.59	0.89
Ag2La2-Ag	0.974714752	-4.52555128	1.321108585	3.399683123	18.74268804	1.541315193	7.58	1.3	1.93	5.01	-4.3	1.59	0.89
Ag2Ta2-Ag	0.970021876	-4.217503844	1.320744831	2.952329142	15.01387309	1.744901392	7.58	1.3	1.93	5.01	-4.3	1.59	0.89
Ag2W2-Ag	0.971454351	-3.959064147	1.268572804	2.681076074	13.64563596	2.091698989	7.58	1.3	1.93	5.01	-4.3	1.59	0.89
Ag2Re2-Ag	0.974326714	-3.797862625	1.23200925	2.418678428	12.44568519	1.917943573	7.58	1.3	1.93	5.01	-4.3	1.59	0.89
Ag2Os2-Ag	0.975036192	-3.607088966	1.1896011	2.262724556	11.98495974	2.033777591	7.58	1.3	1.93	5.01	-4.3	1.59	0.89
Ag2Ir2-Ag	0.976513694	-3.509187578	1.168520007	2.201136086	12.11114533	2.033777591	7.58	1.3	1.93	5.01	-4.3	1.59	0.89
Ag2Pt2-Ag	0.979551092	-3.428252497	1.151079722	2.098355401	12.13295942	2.06304321	7.58	1.3	1.93	5.01	-4.3	1.59	0.89
Ag2Au2-Ag	0.982650181	-3.905190474	1.186138736	2.074924977	13.62058279	2.154109976	7.58	1.3	1.93	5.01	-4.3	1.59	0.89
Os2Sc2-Os	0.741789253	-1.385633157	2.362686948	0.299011475	2.668484512	1.814968834	8.7	1.1	2.2	6.25	-1.5	1.49	1.13
Os2Ti2-Os	0.732421274	-1.461256969	2.41889657	0.211574642	2.469510436	1.907488362	8.7	1.1	2.2	6.25	-1.5	1.49	1.13
Os2V2-Os	0.709188332	-1.503431689	2.505416214	0.125892391	2.318319485	1.951320694	8.7	1.1	2.2	6.25	-1.5	1.49	1.13
Os2Cr2-Os	0.703474855	-1.504021466	2.498557671	0.113316414	2.370535368	1.965607695	8.7	1.1	2.2	6.25	-1.5	1.49	1.13
Os2Mn2-Os	0.69647966	-1.581579058	2.507810292	0.06533541	2.378962614	1.912433258	8.7	1.1	2.2	6.25	-1.5	1.49	1.13
Os2Fe2-Os	0.703560622	-1.542191123	2.459169499	0.052165824	2.437756092	2.043779527	8.7	1.1	2.2	6.25	-1.5	1.49	1.13
Os2Co2-Os	0.69618426	-1.586401717	2.468801989	0.043632654	2.443441348	2.065935451	8.7	1.1	2.2	6.25	-1.5	1.49	1.13
Os2Ni2-Os	0.699744107	-1.589640246	2.451926812	0.048114828	2.480279129	2.079059677	8.7	1.1	2.2	6.25	-1.5	1.49	1.13
Os2Cu2-Os	0.703586209	-1.493637049	2.41745335	0.009511561	2.558142712	2.074698767	8.7	1.1	2.2	6.25	-1.5	1.49	1.13
Os2Y2-Os	0.737585511	-1.451543135	2.454640733	0.357662642	2.712144651	1.737790988	8.7	1.1	2.2	6.25	-1.5	1.49	1.13
Os2Zr2-Os	0.728802759	-1.438193779	2.555902369	0.334213826	2.528552714	1.79884716	8.7	1.1	2.2	6.25	-1.5	1.49	1.13
Os2Nb2-Os	0.710929768	-1.510811206	2.652951253	0.262020295	2.365804694	1.936875036	8.7	1.1	2.2	6.25	-1.5	1.49	1.13
Os2Mo2-Os	0.698663196	-1.584259249	2.704593352	0.181418492	2.27667868	2.183911871	8.7	1.1	2.2	6.25	-1.5	1.49	1.13
Os2Ru2-Os	0.68926688	-1.648275701	2.629188192	0.039402304	2.230269104	2.2	8.7	1.1	2.2	6.25	-1.5	1.49	1.13
Os2Rh2-Os	0.695458667	-1.665506157	2.59237152	0.016041399	2.276714071	2.231657523	8.7	1.1	2.2	6.25	-1.5	1.49	1.13
Os2Pd2-Os	0.69672249	-1.601517765	2.533324078	-0.048399483	2.344680349	2.2	8.7	1.1	2.2	6.25	-1.5	1.49	1.13
Os2Ag2-Os	0.706264485	-1.516480006	2.497244597	-0.103755633	2.566472885	2.087740577	8.7	1.1	2.2	6.25	-1.5	1.49	1.13
Os2La2-Os	0.738797117	-1.594305809	2.473209006	0.270238707	2.799197488	1.667288223	8.7	1.1	2.2	6.25	-1.5	1.49	1.13
Os2Ta2-Os	0.716087259	-1.559930583	2.702156726	0.292304901	2.411491321	1.887513698	8.7	1.1	2.2	6.25	-1.5	1.49	1.13
Os2W2-Os	0.705264357	-1.653053034	2.770285349	0.210034761	2.318556023	2.262655365	8.7	1.1	2.2	6.25	-1.5	1.49	1.13
Os2Re2-Os	0.729406831	-1.919925282	2.58455643	-0.005337409	2.167942558	2.074698767	8.7	1.1	2.2	6.25	-1.5	1.49	1.13
Os2Os2-Os	0.693401301	-1.698299232	2.742329259	0.031061443	2.250668515	2.2	8.7	1.1	2.2	6.25	-1.5	1.49	1.13
Os2Ir2-Os	0.693068638	-1.717206767	2.718064657	-0.020891743	2.26111211	2.2	8.7	1.1	2.2	6.25	-1.5	1.49	1.13
Os2Pt2-Os	0.696314052	-1.716294767	2.672094667	-0.069045353	2.306956389	2.231657523	8.7	1.1	2.2	6.25	-1.5	1.49	1.13
Os2Au2-Os	0.702700498	-1.616972767	2.613987808	-0.158586031	2.503449202	2.330167256	8.7	1.1	2.2	6.25	-1.5	1.49	1.13
Ir2Sc2-Ir	0.80453357	-1.769420619	2.299728865	0.538393414	3.188044962	1.814968834	9.1	1.57	2.2	6.63	-2.11	1.5	1.08
Ir2Ti2-Ir	0.801771243	-1.911372074	2.286604243	0.398340506	2.932464471	1.907488362	9.1	1.57	2.2	6.63	-2.11	1.5	1.08
Ir2V2-Ir	0.787174468	-1.929346821	2.287358129	0.28430757	2.806838509	1.951320694	9.1	1.57	2.2	6.63	-2.11	1.5	1.08
Ir2Cr2-Ir	0.790080409	-1.92542805	2.262641075	0.284184407	2.885301054	1.965607695	9.1	1.57	2.2	6.63	-2.11	1.5	1.08
Ir2Mn2-Ir	0.784652205	-1.973685368	2.237409529	0.195535624	2.896124574	1.912433258	9.1	1.57	2.2	6.63	-2.11	1.5	1.08
Ir2Fe2-Ir	0.794629784	-1.889424836	2.193963496	0.173077813	2.958737121	2.043779527	9.1	1.57	2.2	6.63	-2.11	1.5	1.08
Ir2Co2-Ir	0.787268536	-1.884912196	2.184177464	0.134455937	2.960469578	2.065935451	9.1	1.57	2.2	6.63	-2.11	1.5	1.08
Ir2Ni2-Ir	0.782472898	-1.864683974	2.160621499	0.126487547	3.013487516	2.079059677	9.1	1.57	2.2	6.63	-2.11	1.5	1.08
Ir2Cu2-Ir	0.789096692	-1.776514632	2.139382057	0.096620776	3.045258731	2.074698767	9.1	1.57	2.2	6.63	-2.11	1.5	1.08
Ir2Y2-Ir	0.805782738	-1.830218783	2.337316465	0.62252921	3.329676733	1.737790988	9.1	1.57	2.2	6.63	-2.11	1.5	1.08
Ir2Zr2-Ir	0.797969945	-1.96667173	2.419727219	0.543008114	2.99108648	1.79884716	9.1	1.57	2.2	6.63	-2.11	1.5	1.08
Ir2Nb2-Ir	0.788865513	-2.010861068	2.456078769	0.445420097	2.798991578	1.936875036	9.1	1.57	2.2	6.63	-2.11	1.5	1.08
Ir2Mo2-Ir	0.78226554	-2.040780103	2.431460196	0.324707308	2.670676972	2.183911871	9.1	1.57	2.2	6.63	-2.11	1.5	1.08
Ir2Ru2-Ir	0.779644338	-2.047656784	2.321506879	0.156455802	2.648041107	2.2	9.1	1.57	2.2	6.63	-2.11	1.5	1.08
Ir2Rh2-Ir	0.781166828	-2.001134197	2.285253433	0.113835434	2.713223531	2.231657523	9.1	1.57	2.2	6.63	-2.11	1.5	1.08
Ir2Pd2-Ir	0.783265008	-1.890902523	2.231177339	0.049598077	2.759973498	2.2	9.1	1.57	2.2	6.63	-2.11	1.5	1.08
Ir2Ag2-Ir	0.795187352	-1.817849836	2.215256165	-0.003510002	2.951010927	2.087740577	9.1	1.57	2.2	6.63	-2.11	1.5	1.08
Ir2La2-Ir	0.808464711	-1.938938065	2.348498004	0.532023336	3.437807435	1.667288223	9.1	1.57	2.2	6.63	-2.11	1.5	1.08
Ir2Ta2-Ir	0.790633684	-2.062200405	2.493638409	0.452867756	2.820062624	1.887513698	9.1	1.57	2.2	6.63	-2.11	1.5	1.08
Ir2W2-Ir	0.783677655	-2.090760018	2.510857003	0.354688427	2.714356044	2.262655365	9.1	1.57	2.2	6.63	-2.11	1.5	1.08
Ir2Re2-Ir	0.785886684	-2.101984566	2.456695546	0.216414747	2.610003844	2.074698767	9.1	1.57	2.2	6.63	-2.11	1.5	1.08
Ir2Os2-Ir	0.777771838	-2.111866852	2.433869297	0.145701161	2.606436694	2.2	9.1	1.57	2.2	6.63	-2.11	1.5	1.08
Ir2Ir2-Ir	0.772868279	-2.132659248	2.401270602	0.084761765	2.624798985	2.2	9.1	1.57	2.2	6.63	-2.11	1.5	1.08
Ir2Pt2-Ir	0.782478367	-2.019720685	2.358225842	0.017062146	2.660906979	2.231657523	9.1	1.57	2.2	6.63	-2.11	1.5	1.08
Ir2Au2-Ir	0.791292371	-1.926553471	2.318283771	-0.063165909	2.825947071	2.330167256	9.1	1.57	2.2	6.63	-2.11	1.5	1.08
Pt2Sc2-Pt	0.89467923	-2.411948977	1.968925163	0.930310128	4.247712575	1.854284942	9	2.13	2.28	6.74	-2.25	1.53	1.04
Pt2Ti2-Pt	0.898099826	-2.49237469	1.890309371	0.692997463	3.822783697	1.948808641	9	2.13	2.28	6.74	-2.25	1.53	1.04
Pt2V2-Pt	0.886529453	-2.344829493	1.878061871	0.60055236	3.711904172	1.993590475	9	2.13	2.28	6.74	-2.25	1.53	1.04
Pt2Cr2-Pt	0.89219906	-2.176539658	1.852048192	0.587305232	3.850163908	2.008186963	9	2.13	2.28	6.74	-2.25	1.53	1.04
Pt2Mn2-Pt	0.883063262	-2.272260583	1.824063144	0.452670003	3.754567753	1.953860655	9	2.13	2.28	6.74	-2.25	1.53	1.04
Pt2Fe2-Pt	0.895967611	-2.154112337	1.802704412	0.394777728	3.800686125	2.088052164	9	2.13	2.28	6.74	-2.25	1.53	1.04
Pt2Co2-Pt	0.894089118	-2.13650913	1.790564552	0.340183752	3.76635729	2.110688033	9	2.13	2.28	6.74	-2.25	1.53	1.04
Pt2Ni2-Pt	0.889034485	-2.01756201	1.764066555	0.327710859	3.777274695	2.124096558	9	2.13	2.28	6.74	-2.25	1.53	1.04
Pt2Cu2-Pt	0.89630533	-1.9390685	1.754293328	0.291194366	3.761197853	2.119641181	9	2.13	2.28	6.74	-2.25	1.53	1.04
Pt2Y2-Pt	0.892004868	-2.599785882	2.033555185	1.086764145	4.524114467	1.775435259	9	2.13	2.28	6.74	-2.25	1.53	1.04
Pt2Zr2-Pt	0.88513924	-2.606759464	2.073657807	0.956957943	4.104821775	1.837814038	9	2.13	2.28	6.74	-2.25	1.53	1.04
Pt2Nb2-Pt	0.881343833	-2.506727001	2.043658799	0.783044812	3.743649964	1.978831893	9	2.13	2.28	6.74	-2.25	1.53	1.04
Pt2Mo2-Pt	0.877093185	-2.373636667	1.959989886	0.598362718	3.485475593	2.231220074	9	2.13	2.28	6.74	-2.25	1.53	1.04
Pt2Ru2-Pt	0.879679884	-2.201961591	1.859671622	0.382824865	3.380086312	2.247656707	9	2.13	2.28	6.74	-2.25	1.53	1.04
Pt2Rh2-Pt	0.878685563	-2.102441604	1.838478657	0.343167416	3.430732721	2.28	9	2.13	2.28	6.74	-2.25	1.53	1.04
Pt2Pd2-Pt	0.885057613	-2.029765401	1.814200122	0.272732014	3.379630929	2.247656707	9	2.13	2.28	6.74	-2.25	1.53	1.04
Pt2Ag2-Pt	0.895570977	-2.003705747	1.833511487	0.163731352	3.537663203	2.132965504	9	2.13	2.28	6.74	-2.25	1.53	1.04
Pt2La2-Pt	0.892251176	-2.671832418	2.040628073	1.036241564	4.771048931	1.703405253	9	2.13	2.28	6.74	-2.25	1.53	1.04
Pt2Ta2-Pt	0.880161064	-2.537933792	2.110394117	0.813652898	3.877429332	1.928401283	9	2.13	2.28	6.74	-2.25	1.53	1.04
Pt2W2-Pt	0.878096515	-2.461128837	2.046899741	0.627050043	3.570514757	2.311669321	9	2.13	2.28	6.74	-2.25	1.53	1.04
Pt2Re2-Pt	0.877764404	-2.391857738	1.997056302	0.458394242	3.365532465	2.119641181	9	2.13	2.28	6.74	-2.25	1.53	1.04
Pt2Os2-Pt	0.876048381	-2.296799665	1.948347521	0.33679986	3.292456191	2.247656707	9	2.13	2.28	6.74	-2.25	1.53	1.04
Pt2Ir2-Pt	0.875165406	-2.17929446	1.919042278	0.26414146	3.282602774	2.247656707	9	2.13	2.28	6.74	-2.25	1.53	1.04
Pt2Pt2-Pt	0.877249873	-2.116947967	1.897980076	0.208376842	3.249394845	2.28	9	2.13	2.28	6.74	-2.25	1.53	1.04
Pt2Au2-Pt	0.892535935	-2.077005085	1.911591476	0.107491961	3.329942003	2.380643664	9	2.13	2.28	6.74	-2.25	1.53	1.04
Au2Sc2-Au	0.964377742	-3.799843521	1.469427945	2.065607839	9.816783242	1.978407699	9.23	2.31	2.54	6.01	-3.56	1.59	1.01
Au2Ti2-Au	0.967751794	-3.635429478	1.369147691	1.763399836	9.004819952	2.079258657	9.23	2.31	2.54	6.01	-3.56	1.59	1.01
Au2V2-Au	0.964932263	-3.440018818	1.399444926	1.782057091	9.078975625	2.127038113	9.23	2.31	2.54	6.01	-3.56	1.59	1.01
Au2Cr2-Au	0.969106269	-3.442153546	1.410340146	1.753694206	9.231169062	2.142611666	9.23	2.31	2.54	6.01	-3.56	1.59	1.01
Au2Mn2-Au	0.967476079	-3.500349514	1.406015239	1.631520704	9.040638996	2.084648844	9.23	2.31	2.54	6.01	-3.56	1.59	1.01
Au2Fe2-Au	0.969667931	-3.365174649	1.351020196	1.540017795	8.982923345	2.227822911	9.23	2.31	2.54	6.01	-3.56	1.59	1.01
Au2Co2-Au	0.969853218	-3.25214427	1.348227577	1.439399156	8.763126614	2.251973987	9.23	2.31	2.54	6.01	-3.56	1.59	1.01
Au2Ni2-Au	0.969815052	-3.133410218	1.360983209	1.34889178	8.336160994	2.266280056	9.23	2.31	2.54	6.01	-3.56	1.59	1.01
Au2Cu2-Au	0.972242925	-3.284557533	1.36992858	1.361083797	8.542123203	2.261526444	9.23	2.31	2.54	6.01	-3.56	1.59	1.01
Au2Y2-Au	0.95951553	-4.031547992	1.573033289	2.336756405	10.76979718	1.894279949	9.23	2.31	2.54	6.01	-3.56	1.59	1.01
Au2Zr2-Au	0.958821304	-3.775008606	1.540951153	2.180528571	9.986355031	1.96083426	9.23	2.31	2.54	6.01	-3.56	1.59	1.01
Au2Nb2-Au	0.957426088	-3.652729646	1.505099002	1.831401436	8.403022735	2.111291616	9.23	2.31	2.54	6.01	-3.56	1.59	1.01
Au2Mo2-Au	0.959674077	-3.449513576	1.466916144	1.60108988	7.588549521	2.380574243	9.23	2.31	2.54	6.01	-3.56	1.59	1.01
Au2Ru2-Au	0.963385247	-3.128896458	1.395265481	1.29581015	7.003887872	2.398111117	9.23	2.31	2.54	6.01	-3.56	1.59	1.01
Au2Rh2-Au	0.96511374	-2.981889929	1.372060904	1.246974003	7.060422801	2.432619416	9.23	2.31	2.54	6.01	-3.56	1.59	1.01
Au2Pd2-Au	0.969378459	-2.910998357	1.364638647	1.098888408	6.739728097	2.398111117	9.23	2.31	2.54	6.01	-3.56	1.59	1.01
Au2Ag2-Au	0.973058267	-3.355111017	1.388981035	1.170187893	7.956984056	2.275742675	9.23	2.31	2.54	6.01	-3.56	1.59	1.01
Au2La2-Au	0.961247917	-4.194514306	1.606062446	2.311715942	10.7217345	1.817428374	9.23	2.31	2.54	6.01	-3.56	1.59	1.01
Au2Ta2-Au	0.955845141	-3.674596494	1.546240148	1.89273067	8.784164579	2.057485265	9.23	2.31	2.54	6.01	-3.56	1.59	1.01
Au2W2-Au	0.955564528	-3.47190465	1.492015977	1.639361487	7.864272585	2.466408629	9.23	2.31	2.54	6.01	-3.56	1.59	1.01
Au2Re2-Au	0.959812235	-3.398799764	1.49391835	1.392370509	6.938443667	2.261526444	9.23	2.31	2.54	6.01	-3.56	1.59	1.01
Au2Os2-Au	0.96021299	-3.219961816	1.457824041	1.256051974	6.644261809	2.398111117	9.23	2.31	2.54	6.01	-3.56	1.59	1.01
Au2Ir2-Au	0.961904807	-3.094599417	1.443385518	1.185661132	6.538100452	2.398111117	9.23	2.31	2.54	6.01	-3.56	1.59	1.01
Au2Pt2-Au	0.965765677	-2.984638891	1.42730951	1.082553572	6.425540151	2.432619416	9.23	2.31	2.54	6.01	-3.56	1.59	1.01
Au2Au2-Au	0.968676482	-3.329924452	1.452737489	1.015633156	6.881269606	2.54	9.23	2.31	2.54	6.01	-3.56	1.59	1.01
CoSc3-Co	0.812576544	-1.220268958	1.624064808	1.084304675	4.343185597	1.619037096	7.88	0.66	1.88	5.76	-1.17	1.39	0.76
CoTi3-Co	0.810509492	-1.31360885	1.67918557	0.939026687	4.092244521	1.714634202	7.88	0.66	1.88	5.76	-1.17	1.39	0.76
CoV3-Co	0.793996661	-1.322980003	1.701705515	0.722431257	3.691491809	1.760176416	7.88	0.66	1.88	5.76	-1.17	1.39	0.76
CoCr3-Co	0.784972097	-1.344411601	1.656777043	0.49082039	3.4765799	1.775054965	7.88	0.66	1.88	5.76	-1.17	1.39	0.76
CoFe3-Co	0.788868951	-1.190849935	1.712665843	0.35423673	3.384842599	1.856755545	7.88	0.66	1.88	5.76	-1.17	1.39	0.76
CoCo3-Co	0.775102109	-1.196786399	1.525308788	0.200228834	3.98851329	1.88	7.88	0.66	1.88	5.76	-1.17	1.39	0.76
CoNi3-Co	0.778942404	-1.477742233	1.736425366	0.304545726	3.24161816	1.893787149	7.88	0.66	1.88	5.76	-1.17	1.39	0.76
CoCu3-Co	0.787094974	-1.394906224	1.714098749	0.197436538	3.431933895	1.889204474	7.88	0.66	1.88	5.76	-1.17	1.39	0.76
CoY3-Co	0.808592384	-1.305172956	1.670511256	0.957875801	4.264891078	1.539862138	7.88	0.66	1.88	5.76	-1.17	1.39	0.76
CoZr3-Co	0.80330353	-1.360821799	1.774186178	0.82242117	3.707361232	1.60245467	7.88	0.66	1.88	5.76	-1.17	1.39	0.76
CoNb3-Co	0.800827421	-1.450945186	1.84281217	0.640660866	3.481999414	1.745149672	7.88	0.66	1.88	5.76	-1.17	1.39	0.76
CoMo3-Co	0.79219894	-1.424427326	1.905019353	0.486179165	3.330507511	2.004410767	7.88	0.66	1.88	5.76	-1.17	1.39	0.76
CoRu3-Co	0.772881134	-1.447385487	1.932247655	0.086728023	2.977606139	2.021457871	7.88	0.66	1.88	5.76	-1.17	1.39	0.76
CoRh3-Co	0.777331141	-1.492073485	1.893365754	0.028214054	3.078774623	2.055058343	7.88	0.66	1.88	5.76	-1.17	1.39	0.76
CoPd3-Co	0.776583986	-1.535079192	1.896719153	-0.026302253	3.012459766	2.021457871	7.88	0.66	1.88	5.76	-1.17	1.39	0.76
CoAg3-Co	0.78401587	-1.46514484	1.765963007	-0.119950458	3.712366386	1.9029139	7.88	0.66	1.88	5.76	-1.17	1.39	0.76
CoLa3-Co	0.793792181	-0.769115978	1.47871207	0.365963721	11.41868224	1.375238969	7.88	0.66	1.88	5.76	-1.17	1.39	0.76
CoTa3-Co	0.803471724	-1.526494437	1.866148958	0.550008276	3.344228084	1.693933458	7.88	0.66	1.88	5.76	-1.17	1.39	0.76
CoW3-Co	0.798948074	-1.60276854	1.981637777	0.444901197	3.584838085	2.088029785	7.88	0.66	1.88	5.76	-1.17	1.39	0.76
CoRe3-Co	0.79423343	-1.309674353	1.620364354	-0.160537898	3.661941238	1.891974594	7.88	0.66	1.88	5.76	-1.17	1.39	0.76
CoOs3-Co	0.780795188	-1.458846602	2.07410453	-0.005114281	3.40293731	2.065935451	7.88	0.66	1.88	5.76	-1.17	1.39	0.76
CoIr3-Co	0.783842508	-1.523660082	2.042797698	-0.207479565	3.438859234	2.021457871	7.88	0.66	1.88	5.76	-1.17	1.39	0.76
CoPt3-Co	0.777289678	-1.580748671	2.046712636	-0.295529117	3.382431055	2.055058343	7.88	0.66	1.88	5.76	-1.17	1.39	0.76
NiSc3-Ni	0.881553026	-1.983553211	1.542449977	1.646985738	6.330755741	1.632897791	7.64	1.16	1.91	5.77	-1.29	1.38	0.71
NiTi3-Ni	0.885331432	-1.937803729	1.566142777	1.477688039	5.936408873	1.729313311	7.64	1.16	1.91	5.77	-1.29	1.38	0.71
NiV3-Ni	0.875860447	-1.79017907	1.524028712	1.137136729	5.026558904	1.73670442	7.64	1.16	1.91	5.77	-1.29	1.38	0.71
NiCr3-Ni	0.874967866	-1.641062784	1.437283781	0.856646658	4.781012063	1.755812755	7.64	1.16	1.91	5.77	-1.29	1.38	0.71
NiMn3-Ni	0.872639474	-1.454103124	1.379283317	0.686504395	4.972158274	1.685048346	7.64	1.16	1.91	5.77	-1.29	1.38	0.71
NiFe3-Ni	0.878621115	-1.532409785	1.440598288	0.622201558	4.885310975	1.872651365	7.64	1.16	1.91	5.77	-1.29	1.38	0.71
NiCo3-Ni	0.875552031	-1.521494662	1.408206695	0.499246478	4.887211973	1.891943037	7.64	1.16	1.91	5.77	-1.29	1.38	0.71
NiNi3-Ni	0.867716853	-1.405790032	1.374056827	0.454568849	4.933961105	1.91	7.64	1.16	1.91	5.77	-1.29	1.38	0.71
NiCu3-Ni	0.884355253	-1.161261237	1.341880545	0.186548578	5.339839822	1.905378092	7.64	1.16	1.91	5.77	-1.29	1.38	0.71
NiY3-Ni	0.883337827	-2.00515456	1.559324062	1.54338681	5.964090137	1.553045011	7.64	1.16	1.91	5.77	-1.29	1.38	0.71
NiZr3-Ni	0.877568004	-1.976393881	1.619594949	1.290047579	5.018868441	1.616173402	7.64	1.16	1.91	5.77	-1.29	1.38	0.71
NiNb3-Ni	0.874298823	-1.991333623	1.700263422	1.099055031	4.797406385	1.760090027	7.64	1.16	1.91	5.77	-1.29	1.38	0.71
NiMo3-Ni	0.8700076	-1.86799269	1.711213577	0.895481324	4.696146401	2.056295843	7.64	1.16	1.91	5.77	-1.29	1.38	0.71
NiRu3-Ni	0.869660018	-1.547902778	1.588702959	0.189660626	4.066856075	2.079059677	7.64	1.16	1.91	5.77	-1.29	1.38	0.71
NiRh3-Ni	0.871594496	-1.544941269	1.562271448	0.108607639	4.199252485	2.124096558	7.64	1.16	1.91	5.77	-1.29	1.38	0.71
NiPd3-Ni	0.871970258	-1.369956769	1.511309987	-0.098420582	4.475908629	2.079059677	7.64	1.16	1.91	5.77	-1.29	1.38	0.71
NiAg3-Ni	0.88897108	-1.173128764	1.451876835	-0.488184913	6.104965934	1.919204885	7.64	1.16	1.91	5.77	-1.29	1.38	0.71
NiLa3-Ni	0.88855272	-1.973048301	1.579704394	0.941485583	7.843763992	1.480573512	7.64	1.16	1.91	5.77	-1.29	1.38	0.71
NiTa3-Ni	0.872930629	-2.10821657	1.725164372	1.012378892	4.640100765	1.708435346	7.64	1.16	1.91	5.77	-1.29	1.38	0.71
NiW3-Ni	0.872011979	-1.965781066	1.798330568	0.910679512	5.066493472	2.168505603	7.64	1.16	1.91	5.77	-1.29	1.38	0.71
NiRe3-Ni	0.873809534	-1.372390683	1.530414701	0.39234376	5.128442125	1.903993702	7.64	1.16	1.91	5.77	-1.29	1.38	0.71
NiOs3-Ni	0.875521564	-1.561495165	1.637872241	-0.002521837	4.632805664	2.079059677	7.64	1.16	1.91	5.77	-1.29	1.38	0.71
NiIr3-Ni	0.871241037	-1.584917177	1.715779964	-0.181129249	4.386561686	2.079059677	7.64	1.16	1.91	5.77	-1.29	1.38	0.71
NiPt3-Ni	0.872781435	-1.524072857	1.678512619	-0.382415789	4.628608302	2.124096558	7.64	1.16	1.91	5.77	-1.29	1.38	0.71
CuSc3-Cu	0.962657014	-3.437004474	1.22032766	3.221474295	16.71875347	1.554621915	7.73	1.24	1.9	5.3	-2.67	1.41	0.67
CuTi3-Cu	0.96422543	-3.166196255	1.173617316	2.796569858	13.97463659	1.67499638	7.73	1.24	1.9	5.3	-2.67	1.41	0.67
CuV3-Cu	0.960743818	-2.922558206	1.164538661	2.314968981	11.16765201	1.733061614	7.73	1.24	1.9	5.3	-2.67	1.41	0.67
CuCr3-Cu	0.962721128	-2.749565264	1.142159606	2.030609233	10.45378058	1.752129869	7.73	1.24	1.9	5.3	-2.67	1.41	0.67
CuMn3-Cu	0.962758461	-2.742395957	1.144161005	1.869948913	10.51163656	1.681513891	7.73	1.24	1.9	5.3	-2.67	1.41	0.67
CuFe3-Cu	0.96608435	-2.662446332	1.087714127	1.611877002	9.955200562	1.857685085	7.73	1.24	1.9	5.3	-2.67	1.41	0.67
CuCo3-Cu	0.967216379	-2.375582088	1.059906863	1.305377673	9.150989221	1.887974612	7.73	1.24	1.9	5.3	-2.67	1.41	0.67
CuNi3-Cu	0.96600779	-2.19103327	1.04587826	1.249909419	9.04845026	1.9059937	7.73	1.24	1.9	5.3	-2.67	1.41	0.67
CuCu3-Cu	0.972215011	-2.383479033	1.049691457	1.120221494	9.923558007	1.9	7.73	1.24	1.9	5.3	-2.67	1.41	0.67
CuY3-Cu	0.961594795	-3.394282972	1.194914686	2.97626676	15.14370149	1.548661409	7.73	1.24	1.9	5.3	-2.67	1.41	0.67
CuZr3-Cu	0.961016174	-3.333736763	1.256194607	2.571792733	11.99837988	1.533954313	7.73	1.24	1.9	5.3	-2.67	1.41	0.67
CuNb3-Cu	0.961971843	-3.218503135	1.344917937	2.348879619	11.00348839	1.713852451	7.73	1.24	1.9	5.3	-2.67	1.41	0.67
CuMo3-Cu	0.959884749	-3.061453688	1.352675608	1.928540297	9.041487331	2.051982682	7.73	1.24	1.9	5.3	-2.67	1.41	0.67
CuRu3-Cu	0.961943068	-2.431851091	1.224752015	0.960657327	6.511153895	2.074698767	7.73	1.24	1.9	5.3	-2.67	1.41	0.67
CuRh3-Cu	0.962474797	-2.368628114	1.203002949	0.843110286	6.57285268	2.119641181	7.73	1.24	1.9	5.3	-2.67	1.41	0.67
CuPd3-Cu	0.968935438	-2.149692478	1.174771261	0.45222025	6.449379284	2.074698767	7.73	1.24	1.9	5.3	-2.67	1.41	0.67
CuAg3-Cu	0.973848703	-2.57261275	1.18852626	0.094570844	8.385323034	1.917943573	7.73	1.24	1.9	5.3	-2.67	1.41	0.67
CuLa3-Cu	0.965804081	-3.158396973	1.174584911	2.098112261	15.98484911	1.476394467	7.73	1.24	1.9	5.3	-2.67	1.41	0.67
CuTa3-Cu	0.96070367	-3.399686445	1.389835685	2.305053996	10.96488298	1.648755267	7.73	1.24	1.9	5.3	-2.67	1.41	0.67
CuW3-Cu	0.962030376	-2.513478367	1.163656275	2.023053371	11.3174973	2.163957077	7.73	1.24	1.9	5.3	-2.67	1.41	0.67
CuRe3-Cu	0.961403737	-2.475504066	1.217439034	1.269414584	8.173265347	1.9	7.73	1.24	1.9	5.3	-2.67	1.41	0.67
CuOs3-Cu	0.961639585	-2.609835493	1.322630411	0.786622417	6.427778749	2.074698767	7.73	1.24	1.9	5.3	-2.67	1.41	0.67
CuIr3-Cu	0.959421701	-2.611303146	1.327496031	0.523151849	6.086645723	2.074698767	7.73	1.24	1.9	5.3	-2.67	1.41	0.67
CuPt3-Cu	0.965697488	-2.446602448	1.309014603	0.191194487	6.040637278	2.119641181	7.73	1.24	1.9	5.3	-2.67	1.41	0.67
CuAu3-Cu	0.973540196	-2.605493761	1.32220206	-0.242353841	7.157499687	2.261526444	7.73	1.24	1.9	5.3	-2.67	1.41	0.67
RuSc3-Ru	0.786328724	-1.141053229	1.785905271	0.724978573	3.050337257	1.648513156	7.36	1.05	2.2	5.73	-1.41	1.48	1.05
RuTi3-Ru	0.781195696	-1.297301731	1.825531675	0.526872458	2.756283302	1.776157626	7.36	1.05	2.2	5.73	-1.41	1.48	1.05
RuV3-Ru	0.744314663	-1.228182113	1.895654712	0.318927335	2.480998851	1.837729704	7.36	1.05	2.2	5.73	-1.41	1.48	1.05
RuCr3-Ru	0.729974883	-1.302780797	1.900466383	0.205047211	2.491259023	1.857949584	7.36	1.05	2.2	5.73	-1.41	1.48	1.05
RuMn3-Ru	0.728507358	-1.383481967	1.902167871	0.211593647	2.722400121	1.783068761	7.36	1.05	2.2	5.73	-1.41	1.48	1.05
RuFe3-Ru	0.736942015	-1.16487129	1.873226464	0.171014439	2.940026949	1.969879797	7.36	1.05	2.2	5.73	-1.41	1.48	1.05
RuCo3-Ru	0.730188237	-1.220761066	1.880947069	0.130690511	2.977739409	2.001998657	7.36	1.05	2.2	5.73	-1.41	1.48	1.05
RuNi3-Ru	0.726049097	-1.261480048	1.863340675	0.169705062	3.010285613	2.021106006	7.36	1.05	2.2	5.73	-1.41	1.48	1.05
RuCu3-Ru	0.735235133	-1.147303754	1.86316107	0.066231232	3.144776798	2.014750318	7.36	1.05	2.2	5.73	-1.41	1.48	1.05
RuY3-Ru	0.77426913	-1.179855195	1.957014037	0.849762351	3.118947025	1.544489538	7.36	1.05	2.2	5.73	-1.41	1.48	1.05
RuZr3-Ru	0.764808979	-1.35333172	2.031045552	0.658719336	2.726413964	1.626597337	7.36	1.05	2.2	5.73	-1.41	1.48	1.05
RuNb3-Ru	0.752348827	-1.404965098	2.08106124	0.474089912	2.529973432	1.817360405	7.36	1.05	2.2	5.73	-1.41	1.48	1.05
RuMo3-Ru	0.727367992	-1.411660659	2.198382133	0.397268815	2.551170557	2.175911979	7.36	1.05	2.2	5.73	-1.41	1.48	1.05
RuRu3-Ru	0.705151956	-1.408756268	2.07756513	0.107570537	2.469496521	2.2	7.36	1.05	2.2	5.73	-1.41	1.48	1.05
RuRh3-Ru	0.718243046	-1.39450842	2.035802206	0.059222491	2.566980996	2.247656707	7.36	1.05	2.2	5.73	-1.41	1.48	1.05
RuPd3-Ru	0.720534117	-1.305756242	1.979040595	-0.05990836	2.655931028	2.2	7.36	1.05	2.2	5.73	-1.41	1.48	1.05
RuAg3-Ru	0.736918464	-1.170392509	1.995513001	-0.282967759	3.294087115	2.033777591	7.36	1.05	2.2	5.73	-1.41	1.48	1.05
RuLa3-Ru	0.782995578	-1.614673764	2.134073012	0.394675427	5.267334549	1.451458702	7.36	1.05	2.2	5.73	-1.41	1.48	1.05
RuTa3-Ru	0.75821287	-1.439842973	2.159953136	0.464078527	2.62177523	1.748331683	7.36	1.05	2.2	5.73	-1.41	1.48	1.05
RuW3-Ru	0.736924465	-1.491680002	2.307118721	0.425154432	2.720156248	2.294649057	7.36	1.05	2.2	5.73	-1.41	1.48	1.05
RuRe3-Ru	0.759369756	-1.771823455	2.067881252	-0.032022064	2.273006632	2.014750318	7.36	1.05	2.2	5.73	-1.41	1.48	1.05
RuOs3-Ru	0.720228331	-1.48371921	2.248543025	0.039423118	2.56549609	2.2	7.36	1.05	2.2	5.73	-1.41	1.48	1.05
RuIr3-Ru	0.723247143	-1.532658358	2.21650616	-0.062238217	2.603229208	2.2	7.36	1.05	2.2	5.73	-1.41	1.48	1.05
RuPt3-Ru	0.719251819	-1.426512393	2.168068629	-0.179126181	2.682895812	2.247656707	7.36	1.05	2.2	5.73	-1.41	1.48	1.05
RuAu3-Ru	0.733137418	-1.268969702	2.142601411	-0.408178611	3.241705436	2.398111117	7.36	1.05	2.2	5.73	-1.41	1.48	1.05
RhSc3-Rh	0.835884163	-1.694603854	1.924794051	1.175505319	4.201026317	1.672234903	7.46	1.14	2.28	5.91	-1.73	1.49	0.99
RhTi3-Rh	0.834359234	-1.812067968	1.916964666	0.926293266	3.679855434	1.801716149	7.46	1.14	2.28	5.91	-1.73	1.49	0.99
RhV3-Rh	0.811158853	-1.798240396	1.915743638	0.714587466	3.337668368	1.864174236	7.46	1.14	2.28	5.91	-1.73	1.49	0.99
RhCr3-Rh	0.807517869	-1.764485007	1.836511287	0.562896354	3.338466165	1.884685076	7.46	1.14	2.28	5.91	-1.73	1.49	0.99
RhMn3-Rh	0.825581628	-1.52172233	1.823183584	0.578889795	3.663778767	1.808726734	7.46	1.14	2.28	5.91	-1.73	1.49	0.99
RhFe3-Rh	0.824046592	-1.514075909	1.754878346	0.461841542	3.684162915	1.998225941	7.46	1.14	2.28	5.91	-1.73	1.49	0.99
RhCo3-Rh	0.811861063	-1.513927249	1.735366442	0.381939804	3.699626066	2.030806984	7.46	1.14	2.28	5.91	-1.73	1.49	0.99
RhCu3-Rh	0.819633145	-1.313915186	1.678784945	0.291966619	3.980340494	2.043742138	7.46	1.14	2.28	5.91	-1.73	1.49	0.99
RhY3-Rh	0.83730374	-1.965078263	1.959572575	1.243856539	4.096632738	1.566714407	7.46	1.14	2.28	5.91	-1.73	1.49	0.99
RhZr3-Rh	0.827784412	-1.978209584	2.00092091	1.005114324	3.580479875	1.65000372	7.46	1.14	2.28	5.91	-1.73	1.49	0.99
RhNb3-Rh	0.808684379	-1.922460037	2.141397967	0.899253311	3.494419179	1.843511828	7.46	1.14	2.28	5.91	-1.73	1.49	0.99
RhMo3-Rh	0.801849415	-1.84267491	2.113642058	0.678574539	3.154802117	2.207222881	7.46	1.14	2.28	5.91	-1.73	1.49	0.99
RhRu3-Rh	0.794547426	-1.725300799	1.922434067	0.325885133	2.998056766	2.231657523	7.46	1.14	2.28	5.91	-1.73	1.49	0.99
RhRh3-Rh	0.790923346	-1.695593342	1.876600066	0.260073181	3.119721635	2.28	7.46	1.14	2.28	5.91	-1.73	1.49	0.99
RhPd3-Rh	0.811888595	-1.540714409	1.81010629	0.132238856	3.218663107	2.231657523	7.46	1.14	2.28	5.91	-1.73	1.49	0.99
RhAg3-Rh	0.823452037	-1.352835185	1.816472071	-0.140429933	3.89762105	2.06304321	7.46	1.14	2.28	5.91	-1.73	1.49	0.99
RhTa3-Rh	0.810126578	-2.053843639	2.140494599	0.808865383	3.382843471	1.773489797	7.46	1.14	2.28	5.91	-1.73	1.49	0.99
RhW3-Rh	0.803190353	-1.931966068	2.260321797	0.728991256	3.356334727	2.32766856	7.46	1.14	2.28	5.91	-1.73	1.49	0.99
RhRe3-Rh	0.816455087	-1.910956203	2.057195796	0.299765823	2.830672161	2.043742138	7.46	1.14	2.28	5.91	-1.73	1.49	0.99
RhOs3-Rh	0.797146425	-1.79699242	2.071337649	0.230435778	3.016286179	2.231657523	7.46	1.14	2.28	5.91	-1.73	1.49	0.99
RhIr3-Rh	0.797201385	-1.78114271	2.032386924	0.105119918	3.034208918	2.231657523	7.46	1.14	2.28	5.91	-1.73	1.49	0.99
RhPt3-Rh	0.805772021	-1.662121617	1.981044319	-0.023056738	3.138101573	2.28	7.46	1.14	2.28	5.91	-1.73	1.49	0.99
RhAu3-Rh	0.814117727	-1.475608086	1.956595801	-0.255738972	3.625779739	2.432619416	7.46	1.14	2.28	5.91	-1.73	1.49	0.99
PdSc3-Pd	0.926376369	-2.828734775	1.667933837	1.905808751	7.312691222	1.648513156	8.34	0.56	2.2	5.9	-1.83	1.52	0.94
PdTi3-Pd	0.929516951	-2.682802619	1.532466475	1.496488917	5.984700281	1.776157626	8.34	0.56	2.2	5.9	-1.83	1.52	0.94
PdV3-Pd	0.917801978	-2.395005504	1.499137247	1.247972233	5.389873467	1.837729704	8.34	0.56	2.2	5.9	-1.83	1.52	0.94
PdCr3-Pd	0.92570301	-2.06552419	1.42774255	0.97380137	5.216708787	1.857949584	8.34	0.56	2.2	5.9	-1.83	1.52	0.94
PdFe3-Pd	0.928698682	-2.07231339	1.402553704	0.858646072	5.349749579	1.969879797	8.34	0.56	2.2	5.9	-1.83	1.52	0.94
PdCo3-Pd	0.929020825	-1.942944405	1.378254874	0.668541971	5.256195431	2.001998657	8.34	0.56	2.2	5.9	-1.83	1.52	0.94
PdNi3-Pd	0.92754857	-1.75556517	1.321496257	0.691052949	5.38034323	2.021106006	8.34	0.56	2.2	5.9	-1.83	1.52	0.94
PdCu3-Pd	0.937712325	-1.634797497	1.323507377	0.58443435	5.265243224	2.014750318	8.34	0.56	2.2	5.9	-1.83	1.52	0.94
PdY3-Pd	0.918149584	-3.188239995	1.657497277	2.005519283	7.272594338	1.544489538	8.34	0.56	2.2	5.9	-1.83	1.52	0.94
PdZr3-Pd	0.9144088	-3.000449593	1.732268198	1.805089139	6.743080974	1.626597337	8.34	0.56	2.2	5.9	-1.83	1.52	0.94
PdNb3-Pd	0.911232403	-2.668555585	1.763955307	1.555021207	5.91552506	1.817360405	8.34	0.56	2.2	5.9	-1.83	1.52	0.94
PdMo3-Pd	0.912390661	-2.409173446	1.644391133	1.180375472	4.9894739	2.175911979	8.34	0.56	2.2	5.9	-1.83	1.52	0.94
PdRu3-Pd	0.913129186	-2.032372635	1.482835463	0.641722377	4.073232052	2.2	8.34	0.56	2.2	5.9	-1.83	1.52	0.94
PdRh3-Pd	0.913758947	-1.909092321	1.470051453	0.578828654	4.151639494	2.247656707	8.34	0.56	2.2	5.9	-1.83	1.52	0.94
PdPd3-Pd	0.917306575	-1.711053007	1.426094341	0.39040219	3.983247775	2.2	8.34	0.56	2.2	5.9	-1.83	1.52	0.94
PdAg3-Pd	0.937446424	-1.669404487	1.456991505	0.019183034	4.940630734	2.033777591	8.34	0.56	2.2	5.9	-1.83	1.52	0.94
PdLa3-Pd	0.924702925	-3.408272143	1.774201959	1.707032331	8.711271225	1.451458702	8.34	0.56	2.2	5.9	-1.83	1.52	0.94
PdTa3-Pd	0.910210817	-2.654814153	1.842583377	1.560654322	6.169170018	1.748331683	8.34	0.56	2.2	5.9	-1.83	1.52	0.94
PdW3-Pd	0.90775755	-2.489240361	1.760650978	1.20423795	5.176766292	2.294649057	8.34	0.56	2.2	5.9	-1.83	1.52	0.94
PdRe3-Pd	0.916615011	-2.154075105	1.609280762	0.736762235	4.578648423	2.014750318	8.34	0.56	2.2	5.9	-1.83	1.52	0.94
PdOs3-Pd	0.911021339	-2.22362941	1.627851852	0.466899505	4.074947262	2.2	8.34	0.56	2.2	5.9	-1.83	1.52	0.94
PdIr3-Pd	0.911457687	-2.036299336	1.596309978	0.333315044	3.866268789	2.2	8.34	0.56	2.2	5.9	-1.83	1.52	0.94
PdPt3-Pd	0.913619196	-1.867898111	1.584655266	0.208795863	3.791543976	2.247656707	8.34	0.56	2.2	5.9	-1.83	1.52	0.94
PdAu3-Pd	0.930009087	-1.746911312	1.591821205	-0.136263243	4.338301404	2.398111117	8.34	0.56	2.2	5.9	-1.83	1.52	0.94
AgSc3-Ag	0.973665442	-4.502391046	1.259042052	3.842748187	20.61919419	1.564394458	7.58	1.3	1.93	5.01	-4.3	1.59	0.89
AgTi3-Ag	0.978030633	-4.255494945	1.13934593	3.497554426	19.05071685	1.685525612	7.58	1.3	1.93	5.01	-4.3	1.59	0.89
AgV3-Ag	0.975947344	-4.146312092	1.183311695	3.459174949	18.85698065	1.74395585	7.58	1.3	1.93	5.01	-4.3	1.59	0.89
AgCr3-Ag	0.978810741	-4.157198364	1.183133291	3.521772804	20.07646369	1.763143971	7.58	1.3	1.93	5.01	-4.3	1.59	0.89
AgMn3-Ag	0.976866753	-4.022687924	1.143858149	3.262465428	19.09082993	1.692084092	7.58	1.3	1.93	5.01	-4.3	1.59	0.89
AgFe3-Ag	0.981264279	-3.964471725	1.105581825	3.160619618	19.40410637	1.86936272	7.58	1.3	1.93	5.01	-4.3	1.59	0.89
AgCo3-Ag	0.980328563	-3.738886297	1.087353886	2.970040508	18.71725787	1.899842651	7.58	1.3	1.93	5.01	-4.3	1.59	0.89
AgNi3-Ag	0.980887469	-3.63284289	1.074845134	2.909947031	18.64912211	1.917975009	7.58	1.3	1.93	5.01	-4.3	1.59	0.89
AgCu3-Ag	0.982220568	-3.846918574	1.082411787	3.074002241	19.97086618	1.911943632	7.58	1.3	1.93	5.01	-4.3	1.59	0.89
AgY3-Ag	0.967749209	-4.85839217	1.399562391	3.890717284	20.53228837	1.465678854	7.58	1.3	1.93	5.01	-4.3	1.59	0.89
AgZr3-Ag	0.968155156	-4.480039251	1.445948692	3.604223922	17.98663273	1.543596937	7.58	1.3	1.93	5.01	-4.3	1.59	0.89
AgNb3-Ag	0.970009371	-4.120658238	1.327925632	3.227662681	15.40507395	1.724625937	7.58	1.3	1.93	5.01	-4.3	1.59	0.89
AgMo3-Ag	0.976137854	-3.842248621	1.17150187	3.230904862	16.93559687	2.064881695	7.58	1.3	1.93	5.01	-4.3	1.59	0.89
AgRu3-Ag	0.975505172	-3.546385786	1.14487212	2.518289411	13.14481361	2.087740577	7.58	1.3	1.93	5.01	-4.3	1.59	0.89
AgRh3-Ag	0.977653465	-3.412962976	1.113552748	2.477799639	13.26635222	2.132965504	7.58	1.3	1.93	5.01	-4.3	1.59	0.89
AgPd3-Ag	0.981888474	-3.339774783	1.08420296	2.257116801	12.76310753	2.087740577	7.58	1.3	1.93	5.01	-4.3	1.59	0.89
AgAg3-Ag	0.979916496	-3.976128879	1.130815859	2.414728581	16.55953151	1.93	7.58	1.3	1.93	5.01	-4.3	1.59	0.89
AgLa3-Ag	0.971422351	-4.847413844	1.373815411	3.585006817	20.01449685	1.377395103	7.58	1.3	1.93	5.01	-4.3	1.59	0.89
AgTa3-Ag	0.967375231	-4.138097565	1.386650669	3.207464881	15.35138241	1.659119543	7.58	1.3	1.93	5.01	-4.3	1.59	0.89
AgW3-Ag	0.97379527	-3.748053448	1.220359426	3.084614303	15.72338195	2.177559975	7.58	1.3	1.93	5.01	-4.3	1.59	0.89
AgRe3-Ag	0.974248332	-3.754015841	1.259906173	2.504644734	12.94663166	1.911943632	7.58	1.3	1.93	5.01	-4.3	1.59	0.89
AgOs3-Ag	0.971847489	-3.709964974	1.249364197	2.197842635	11.44700673	2.087740577	7.58	1.3	1.93	5.01	-4.3	1.59	0.89
AgIr3-Ag	0.973316434	-3.535211388	1.224011788	2.084608553	10.82053816	2.087740577	7.58	1.3	1.93	5.01	-4.3	1.59	0.89
AgPt3-Ag	0.978306027	-3.358734577	1.170945233	1.990615312	10.82690093	2.132965504	7.58	1.3	1.93	5.01	-4.3	1.59	0.89
AgAu3-Ag	0.982468638	-3.856718702	1.214018369	1.908997056	12.41207854	2.275742675	7.58	1.3	1.93	5.01	-4.3	1.59	0.89
OsSc3-Os	0.769908743	-1.217486628	2.132592291	0.493926644	2.913000624	1.648513156	8.7	1.1	2.2	6.25	-1.5	1.49	1.13
OsTi3-Os	0.762820832	-1.386445575	2.180635529	0.332786063	2.651530513	1.776157626	8.7	1.1	2.2	6.25	-1.5	1.49	1.13
OsV3-Os	0.725682837	-1.354848339	2.30772825	0.166054146	2.373368706	1.837729704	8.7	1.1	2.2	6.25	-1.5	1.49	1.13
OsCr3-Os	0.707784456	-1.446476306	2.376115701	0.087636673	2.337966154	1.857949584	8.7	1.1	2.2	6.25	-1.5	1.49	1.13
OsMn3-Os	0.704061098	-1.547342279	2.38403646	0.080904187	2.459138523	1.783068761	8.7	1.1	2.2	6.25	-1.5	1.49	1.13
OsFe3-Os	0.708861703	-1.427097925	2.344243031	0.079605012	2.5578023	1.969879797	8.7	1.1	2.2	6.25	-1.5	1.49	1.13
OsCo3-Os	0.702543523	-1.521981339	2.36784185	0.048278524	2.564275212	2.001998657	8.7	1.1	2.2	6.25	-1.5	1.49	1.13
OsNi3-Os	0.70577656	-1.582639144	2.359663288	0.069851932	2.590182609	2.021106006	8.7	1.1	2.2	6.25	-1.5	1.49	1.13
OsCu3-Os	0.710019675	-1.491372165	2.35383887	0.000280406	2.659641345	2.014750318	8.7	1.1	2.2	6.25	-1.5	1.49	1.13
OsY3-Os	0.757402131	-1.327431502	2.280209005	0.604110918	2.91067509	1.544489538	8.7	1.1	2.2	6.25	-1.5	1.49	1.13
OsZr3-Os	0.744340282	-1.443034267	2.38220107	0.490921544	2.566202253	1.626597337	8.7	1.1	2.2	6.25	-1.5	1.49	1.13
OsNb3-Os	0.730541741	-1.502500835	2.471307593	0.326939665	2.356377122	1.817360405	8.7	1.1	2.2	6.25	-1.5	1.49	1.13
OsMo3-Os	0.701095286	-1.519326294	2.640646173	0.249500403	2.2742683	2.175911979	8.7	1.1	2.2	6.25	-1.5	1.49	1.13
OsRu3-Os	0.686295283	-1.616178488	2.575099996	0.046242199	2.215333525	2.2	8.7	1.1	2.2	6.25	-1.5	1.49	1.13
OsRh3-Os	0.695557706	-1.665875877	2.527730226	0.029278514	2.282596893	2.247656707	8.7	1.1	2.2	6.25	-1.5	1.49	1.13
OsPd3-Os	0.697797653	-1.593233848	2.458705761	-0.062585202	2.346327413	2.2	8.7	1.1	2.2	6.25	-1.5	1.49	1.13
OsAg3-Os	0.710719444	-1.503952826	2.448235519	-0.187430401	2.62980357	2.033777591	8.7	1.1	2.2	6.25	-1.5	1.49	1.13
OsLa3-Os	0.762083621	-1.709331969	2.443878125	0.225047573	4.350986082	1.451458702	8.7	1.1	2.2	6.25	-1.5	1.49	1.13
OsTa3-Os	0.735915759	-1.521626769	2.55018116	0.341964588	2.396250732	1.748331683	8.7	1.1	2.2	6.25	-1.5	1.49	1.13
OsW3-Os	0.716860511	-1.643070959	2.714961507	0.279993677	2.353602441	2.294649057	8.7	1.1	2.2	6.25	-1.5	1.49	1.13
OsRe3-Os	0.752298123	-2.095522231	2.500702845	0.009625055	2.187346796	2.014750318	8.7	1.1	2.2	6.25	-1.5	1.49	1.13
OsOs3-Os	0.693401301	-1.698299232	2.742329259	0.031061443	2.250668515	2.2	8.7	1.1	2.2	6.25	-1.5	1.49	1.13
OsIr3-Os	0.693384175	-1.747086517	2.705711838	-0.039393157	2.26810775	2.2	8.7	1.1	2.2	6.25	-1.5	1.49	1.13
OsPt3-Os	0.696291881	-1.700278195	2.637949636	-0.112772245	2.319437792	2.247656707	8.7	1.1	2.2	6.25	-1.5	1.49	1.13
OsAu3-Os	0.708479935	-1.558746892	2.591831006	-0.265052925	2.587100928	2.398111117	8.7	1.1	2.2	6.25	-1.5	1.49	1.13
IrSc3-Ir	0.825498575	-1.798948323	2.168647272	0.806015619	3.538122607	1.648513156	9.1	1.57	2.2	6.63	-2.11	1.5	1.08
IrTi3-Ir	0.816949232	-1.885757674	2.215879262	0.610829886	3.166182591	1.776157626	9.1	1.57	2.2	6.63	-2.11	1.5	1.08
IrV3-Ir	0.79089385	-1.914020829	2.235050792	0.438032519	2.907135738	1.837729704	9.1	1.57	2.2	6.63	-2.11	1.5	1.08
IrCr3-Ir	0.784554409	-1.926968924	2.184995297	0.302148666	2.907487703	1.857949584	9.1	1.57	2.2	6.63	-2.11	1.5	1.08
IrMn3-Ir	0.802365873	-1.794552392	2.168821318	0.339699203	3.093793478	1.783068761	9.1	1.57	2.2	6.63	-2.11	1.5	1.08
IrNi3-Ir	0.787817422	-1.748386454	2.052417099	0.125830809	3.280062701	2.021106006	9.1	1.57	2.2	6.63	-2.11	1.5	1.08
IrCu3-Ir	0.799149119	-1.609214237	2.025451464	0.046084319	3.365278428	2.014750318	9.1	1.57	2.2	6.63	-2.11	1.5	1.08
IrY3-Ir	0.822173913	-2.026759961	2.227065394	0.918537429	3.561530952	1.544489538	9.1	1.57	2.2	6.63	-2.11	1.5	1.08
IrZr3-Ir	0.81292245	-2.10210908	2.297446949	0.751704478	3.159270492	1.626597337	9.1	1.57	2.2	6.63	-2.11	1.5	1.08
IrNb3-Ir	0.791482257	-2.092888275	2.442842999	0.643130501	2.979416974	1.817360405	9.1	1.57	2.2	6.63	-2.11	1.5	1.08
IrMo3-Ir	0.784490003	-2.020580969	2.431689728	0.468848868	2.744022164	2.175911979	9.1	1.57	2.2	6.63	-2.11	1.5	1.08
IrRu3-Ir	0.773954641	-1.961581193	2.276913963	0.190284812	2.645577965	2.2	9.1	1.57	2.2	6.63	-2.11	1.5	1.08
IrRh3-Ir	0.78049543	-1.937774632	2.225813898	0.134464007	2.751867778	2.247656707	9.1	1.57	2.2	6.63	-2.11	1.5	1.08
IrPd3-Ir	0.794209362	-1.825299261	2.151421831	0.035702396	2.830511257	2.2	9.1	1.57	2.2	6.63	-2.11	1.5	1.08
IrAg3-Ir	0.809937085	-1.667220949	2.148023416	-0.150898705	3.200121	2.033777591	9.1	1.57	2.2	6.63	-2.11	1.5	1.08
IrLa3-Ir	0.823608483	-2.288931548	2.362212058	0.637036931	4.649424026	1.451458702	9.1	1.57	2.2	6.63	-2.11	1.5	1.08
IrTa3-Ir	0.797024564	-2.209969492	2.456763091	0.605624126	2.938637555	1.748331683	9.1	1.57	2.2	6.63	-2.11	1.5	1.08
IrW3-Ir	0.785948499	-2.1341554	2.569789453	0.535023721	2.879483776	2.294649057	9.1	1.57	2.2	6.63	-2.11	1.5	1.08
IrRe3-Ir	0.803622312	-2.205227527	2.366000349	0.170142948	2.477982352	2.014750318	9.1	1.57	2.2	6.63	-2.11	1.5	1.08
IrOs3-Ir	0.779936027	-2.117703863	2.455969039	0.173260579	2.612305296	2.2	9.1	1.57	2.2	6.63	-2.11	1.5	1.08
IrIr3-Ir	0.772868279	-2.132659248	2.401270602	0.084761765	2.624798985	2.2	9.1	1.57	2.2	6.63	-2.11	1.5	1.08
IrPt3-Ir	0.787434231	-1.977170946	2.335976229	-0.015983401	2.683291892	2.247656707	9.1	1.57	2.2	6.63	-2.11	1.5	1.08
IrAu3-Ir	0.792654142	-1.778624228	2.300291926	-0.187496809	2.920053756	2.398111117	9.1	1.57	2.2	6.63	-2.11	1.5	1.08
PtSc3-Pt	0.889454401	-2.664591229	2.018097543	1.342983294	5.033139249	1.672234903	9	2.13	2.28	6.74	-2.25	1.53	1.04
PtV3-Pt	0.873799096	-2.503763455	1.890373459	0.794902955	3.947740048	1.864174236	9	2.13	2.28	6.74	-2.25	1.53	1.04
PtCr3-Pt	0.890746682	-2.210799252	1.802841037	0.552947833	3.972973648	1.884685076	9	2.13	2.28	6.74	-2.25	1.53	1.04
PtMn3-Pt	0.886089186	-2.174785599	1.822776328	0.686535411	4.164606422	1.808726734	9	2.13	2.28	6.74	-2.25	1.53	1.04
PtFe3-Pt	0.888200208	-2.181645458	1.756760204	0.514082714	4.042020466	1.998225941	9	2.13	2.28	6.74	-2.25	1.53	1.04
PtCo3-Pt	0.885586164	-2.098818808	1.729675351	0.392539224	4.070540626	2.030806984	9	2.13	2.28	6.74	-2.25	1.53	1.04
PtNi3-Pt	0.882878336	-1.965855926	1.692439649	0.371599535	4.141758797	2.050189284	9	2.13	2.28	6.74	-2.25	1.53	1.04
PtCu3-Pt	0.897846626	-1.817484205	1.676547151	0.30746102	4.217893205	2.043742138	9	2.13	2.28	6.74	-2.25	1.53	1.04
PtY3-Pt	0.875585649	-2.998384627	1.98954727	1.446854475	5.066593643	1.566714407	9	2.13	2.28	6.74	-2.25	1.53	1.04
PtZr3-Pt	0.871791345	-2.904560242	2.068742486	1.301295408	4.750831693	1.65000372	9	2.13	2.28	6.74	-2.25	1.53	1.04
PtNb3-Pt	0.869867552	-2.69398985	2.141048666	1.114555558	4.266227553	1.843511828	9	2.13	2.28	6.74	-2.25	1.53	1.04
PtMo3-Pt	0.870883598	-2.496312751	1.998592737	0.851069678	3.822058001	2.207222881	9	2.13	2.28	6.74	-2.25	1.53	1.04
PtRu3-Pt	0.87379479	-2.268579784	1.844001664	0.471885132	3.467487111	2.231657523	9	2.13	2.28	6.74	-2.25	1.53	1.04
PtRh3-Pt	0.869602797	-2.10050367	1.808364652	0.42385895	3.534900452	2.28	9	2.13	2.28	6.74	-2.25	1.53	1.04
PtPd3-Pt	0.879433838	-1.97366468	1.768687803	0.3038111	3.445562857	2.231657523	9	2.13	2.28	6.74	-2.25	1.53	1.04
PtAg3-Pt	0.898881207	-1.893246757	1.783938046	0.058024998	3.757597394	2.06304321	9	2.13	2.28	6.74	-2.25	1.53	1.04
PtLa3-Pt	0.894938932	-3.151733533	2.088507966	1.282312483	5.967134535	1.472344878	9	2.13	2.28	6.74	-2.25	1.53	1.04
PtTa3-Pt	0.875133859	-2.784714039	2.246712531	1.153835656	4.4530086	1.773489797	9	2.13	2.28	6.74	-2.25	1.53	1.04
PtW3-Pt	0.873571497	-2.556032729	2.130641758	0.891589797	3.933228781	2.32766856	9	2.13	2.28	6.74	-2.25	1.53	1.04
PtRe3-Pt	0.884010958	-2.272469977	1.972323103	0.556214675	3.694322271	2.043742138	9	2.13	2.28	6.74	-2.25	1.53	1.04
PtOs3-Pt	0.877175255	-2.364989009	1.972409727	0.379444763	3.446092365	2.231657523	9	2.13	2.28	6.74	-2.25	1.53	1.04
PtIr3-Pt	0.875530766	-2.215905937	1.927947142	0.274930395	3.306243923	2.231657523	9	2.13	2.28	6.74	-2.25	1.53	1.04
PtPt3-Pt	0.877249873	-2.116947967	1.897980076	0.208376842	3.249394845	2.28	9	2.13	2.28	6.74	-2.25	1.53	1.04
PtAu3-Pt	0.899824113	-2.031731175	1.919724646	0.044418511	3.443987175	2.432619416	9	2.13	2.28	6.74	-2.25	1.53	1.04
AuSc3-Au	0.961084992	-4.043769373	1.497690185	2.640762588	11.94922324	1.746050626	9.23	2.31	2.54	6.01	-3.56	1.59	1.01
AuTi3-Au	0.967708426	-3.812122172	1.335575955	2.296931551	10.961956	1.881247428	9.23	2.31	2.54	6.01	-3.56	1.59	1.01
AuV3-Au	0.963886945	-3.570081457	1.380081221	2.177227819	10.35832758	1.946462537	9.23	2.31	2.54	6.01	-3.56	1.59	1.01
AuCr3-Au	0.968016426	-3.529864395	1.38317752	2.225067676	11.04221241	1.967878765	9.23	2.31	2.54	6.01	-3.56	1.59	1.01
AuMn3-Au	0.966846456	-3.593097464	1.378857223	2.035528442	10.72253268	1.888567473	9.23	2.31	2.54	6.01	-3.56	1.59	1.01
AuFe3-Au	0.969866662	-3.382374098	1.294832179	1.8710741	10.54639521	2.086431546	9.23	2.31	2.54	6.01	-3.56	1.59	1.01
AuCo3-Au	0.969704746	-3.17989679	1.304262805	1.530710472	9.629913207	2.120450781	9.23	2.31	2.54	6.01	-3.56	1.59	1.01
AuNi3-Au	0.970340876	-3.080061492	1.298663059	1.507591335	9.521466484	2.140688653	9.23	2.31	2.54	6.01	-3.56	1.59	1.01
AuCu3-Au	0.973045716	-3.206993834	1.30988779	1.561586372	9.943427008	2.133956918	9.23	2.31	2.54	6.01	-3.56	1.59	1.01
AuY3-Au	0.952625283	-4.459814184	1.580046669	2.855880225	12.70950534	1.635872249	9.23	2.31	2.54	6.01	-3.56	1.59	1.01
AuZr3-Au	0.954565146	-3.905904601	1.609927061	2.807690451	12.375052	1.722838115	9.23	2.31	2.54	6.01	-3.56	1.59	1.01
AuNb3-Au	0.955737346	-3.458629886	1.436837239	2.451003652	10.66225051	1.92488805	9.23	2.31	2.54	6.01	-3.56	1.59	1.01
AuMo3-Au	0.96373032	-3.265949549	1.337986446	2.203628273	10.43295129	2.30465402	9.23	2.31	2.54	6.01	-3.56	1.59	1.01
AuRu3-Au	0.961981349	-3.138406221	1.379697148	1.444220889	7.263474142	2.330167256	9.23	2.31	2.54	6.01	-3.56	1.59	1.01
AuRh3-Au	0.963411257	-3.005838941	1.370550639	1.373216233	7.142249285	2.380643664	9.23	2.31	2.54	6.01	-3.56	1.59	1.01
AuPd3-Au	0.971243495	-2.858115867	1.316598101	1.221125346	6.992544233	2.330167256	9.23	2.31	2.54	6.01	-3.56	1.59	1.01
AuAg3-Au	0.973862832	-3.372623885	1.350222176	1.272023416	8.747197135	2.154109976	9.23	2.31	2.54	6.01	-3.56	1.59	1.01
AuLa3-Au	0.967010977	-4.035456731	1.248511281	4.110096739	24.8037093	1.239689242	9.23	2.31	2.54	6.01	-3.56	1.59	1.01
AuTa3-Au	0.951845392	-3.555829622	1.556435802	2.372038466	10.27729146	1.851775109	9.23	2.31	2.54	6.01	-3.56	1.59	1.01
AuW3-Au	0.958992446	-3.221241736	1.428154111	2.122261671	9.86157233	2.430416408	9.23	2.31	2.54	6.01	-3.56	1.59	1.01
AuOs3-Au	0.957925147	-3.33077968	1.487327077	1.296933728	6.863856399	2.330167256	9.23	2.31	2.54	6.01	-3.56	1.59	1.01
AuIr3-Au	0.958343604	-3.199429878	1.470628131	1.236799021	6.488554674	2.330167256	9.23	2.31	2.54	6.01	-3.56	1.59	1.01
AuPt3-Au	0.963856321	-2.931503035	1.423546051	1.108997982	6.195316879	2.380643664	9.23	2.31	2.54	6.01	-3.56	1.59	1.01
AuAu3-Au	0.968676482	-3.329924452	1.452737489	1.015633156	6.881269606	2.54	9.23	2.31	2.54	6.01	-3.56	1.59	1.01
Co3Sc-Sc-Co	0.792331305	-1.155724628	1.51744215	0.811490132	3.714122388	1.598999687	7.88	0.66	1.88	5.76	-1.17	1.39	0.76
Co3Ti-Ti-Co	0.809714732	-1.048848832	1.492702815	0.657768146	3.518927016	1.701528724	7.88	0.66	1.88	5.76	-1.17	1.39	0.76
Co3V-V-Co	0.800171019	-1.137505005	1.554278122	0.489195583	3.256880016	1.750542773	7.88	0.66	1.88	5.76	-1.17	1.39	0.76
Co3Cr-Cr-Co	0.777217925	-1.205462049	1.621533821	0.446478765	3.481223737	1.74139165	7.88	0.66	1.88	5.76	-1.17	1.39	0.76
Co3Fe-Fe-Co	0.783561086	-1.267840475	1.692705401	0.409523401	3.375220795	1.854831529	7.88	0.66	1.88	5.76	-1.17	1.39	0.76
Co3Co-Co-Co	0.779304241	-1.215828317	1.523422091	0.208236191	3.998128464	1.88	7.88	0.66	1.88	5.76	-1.17	1.39	0.76
Co3Ni-Ni-Co	0.774607344	-1.426666964	1.714717185	0.325219623	3.281220187	1.898405298	7.88	0.66	1.88	5.76	-1.17	1.39	0.76
Co3Cu-Cu-Co	0.780762696	-1.259145335	1.633953012	0.196100193	3.582384853	1.889973545	7.88	0.66	1.88	5.76	-1.17	1.39	0.76
Co3Y-Y-Co	0.371695334	0.484864948	1.247533039	0.476618459	3.426281943	1.514463601	7.88	0.66	1.88	5.76	-1.17	1.39	0.76
Co3Zr-Zr-Co	0.761482097	-0.934038856	1.604863712	0.962088104	4.029591531	1.611963078	7.88	0.66	1.88	5.76	-1.17	1.39	0.76
Co3Nb-Nb-Co	0.787702176	-1.193558713	1.673310189	0.615618737	3.640711627	1.734358671	7.88	0.66	1.88	5.76	-1.17	1.39	0.76
Co3Mo-Mo-Co	0.787877225	-1.208974689	1.543906319	0.463454049	3.548120849	1.980472482	7.88	0.66	1.88	5.76	-1.17	1.39	0.76
Co3Ru-Ru-Co	0.765891425	-1.287599878	1.648778055	0.225598775	3.193685928	2.033715811	7.88	0.66	1.88	5.76	-1.17	1.39	0.76
Co3Rh-Rh-Co	0.765169442	-1.361201018	1.686279667	0.216720815	3.124846408	2.070362287	7.88	0.66	1.88	5.76	-1.17	1.39	0.76
Co3Pd-Pd-Co	0.773303862	-1.441242096	1.732397919	0.176012291	3.244182863	2.033715811	7.88	0.66	1.88	5.76	-1.17	1.39	0.76
Co3Ag-Ag-Co	0.747851142	-1.157881607	1.564561595	0.131346778	3.779501672	1.904835951	7.88	0.66	1.88	5.76	-1.17	1.39	0.76
Co3Ta-Ta-Co	0.788175839	-1.105779117	1.587624651	0.664057413	3.961755001	1.727360077	7.88	0.66	1.88	5.76	-1.17	1.39	0.76
Co3W-W-Co	0.776511694	-1.176544432	1.593643	0.470061555	3.771982145	2.047343231	7.88	0.66	1.88	5.76	-1.17	1.39	0.76
Co3Re-Re-Co	0.767581739	-1.226158406	1.637862065	0.206151946	3.569933385	1.889973545	7.88	0.66	1.88	5.76	-1.17	1.39	0.76
Co3Os-Os-Co	0.77158944	-1.319156931	1.682067485	-0.006638731	3.660332441	2.033715811	7.88	0.66	1.88	5.76	-1.17	1.39	0.76
Co3Ir-Ir-Co	0.763776355	-1.446694425	1.745423592	-0.007664986	3.350764416	2.016033639	7.88	0.66	1.88	5.76	-1.17	1.39	0.76
Co3Pt-Pt-Co	0.770566744	-1.56608158	1.800281934	0.076769027	3.342969254	2.070362287	7.88	0.66	1.88	5.76	-1.17	1.39	0.76
Ni3Sc-Sc-Ni	0.888039758	-1.421972323	1.351692031	1.433360803	6.124028013	1.611707169	7.64	1.16	1.91	5.77	-1.29	1.38	0.71
Ni3Ti-Ti-Ni	0.887761554	-1.635603282	1.388323789	1.233733218	5.540509842	1.71505102	7.64	1.16	1.91	5.77	-1.29	1.38	0.71
Ni3V-V-Ni	0.869027498	-1.679302828	1.420790055	1.011499456	5.065559669	1.76445459	7.64	1.16	1.91	5.77	-1.29	1.38	0.71
Ni3Cr-Cr-Ni	0.87901586	-1.634220673	1.436827168	0.839963056	4.869950916	1.78061787	7.64	1.16	1.91	5.77	-1.29	1.38	0.71
Ni3Mn-Mn-Ni	0.873789459	-1.597996954	1.417674036	0.657187967	4.878346548	1.720610357	7.64	1.16	1.91	5.77	-1.29	1.38	0.71
Ni3Fe-Fe-Ni	0.881468384	-1.483736017	1.389391078	0.653204785	5.133750113	1.869572144	7.64	1.16	1.91	5.77	-1.29	1.38	0.71
Ni3Co-Co-Ni	0.872302317	-1.521719424	1.410071418	0.493599806	4.866211871	1.894940632	7.64	1.16	1.91	5.77	-1.29	1.38	0.71
Ni3Ni-Ni-Ni	0.868233681	-1.413996971	1.374482538	0.458240577	4.934638423	1.91	7.64	1.16	1.91	5.77	-1.29	1.38	0.71
Ni3Cu-Cu-Ni	0.889411783	-1.119975027	1.295578277	0.200488167	5.638683379	1.904993438	7.64	1.16	1.91	5.77	-1.29	1.38	0.71
Ni3Y-Y-Ni	0.876502677	-1.172535257	1.34746853	1.708012436	6.828176435	1.488954417	7.64	1.16	1.91	5.77	-1.29	1.38	0.71
Ni3Zr-Zr-Ni	0.87910889	-1.463107777	1.433330752	1.214813811	5.446057735	1.593831861	7.64	1.16	1.91	5.77	-1.29	1.38	0.71
Ni3Nb-Nb-Ni	0.877974568	-1.600254723	1.502513379	0.945009542	4.91691804	1.748141871	7.64	1.16	1.91	5.77	-1.29	1.38	0.71
Ni3Mo-Mo-Ni	0.876703874	-1.382875476	1.32345453	0.698652646	5.02746195	2.000165865	7.64	1.16	1.91	5.77	-1.29	1.38	0.71
Ni3Ru-Ru-Ni	0.874407021	-1.516226664	1.462282574	0.189776257	4.735902403	2.049878045	7.64	1.16	1.91	5.77	-1.29	1.38	0.71
Ni3Rh-Rh-Ni	0.868356326	-1.350169477	1.41083372	0.073366965	4.870151816	2.086815756	7.64	1.16	1.91	5.77	-1.29	1.38	0.71
Ni3Pd-Pd-Ni	0.870563577	-1.280923869	1.39351279	0.104167781	4.986405679	2.049878045	7.64	1.16	1.91	5.77	-1.29	1.38	0.71
Ni3Ag-Ag-Ni	0.897074551	-1.064709158	1.279487491	-0.176134401	7.402096651	1.919973958	7.64	1.16	1.91	5.77	-1.29	1.38	0.71
Ni3La-La-Ni	0.256382581	0.673000436	1.222197923	-1.225501027	27.32938019	1.449482666	7.64	1.16	1.91	5.77	-1.29	1.38	0.71
Ni3Ta-Ta-Ni	0.88066395	-1.391187168	1.389369419	0.972704433	5.50825717	1.744536565	7.64	1.16	1.91	5.77	-1.29	1.38	0.71
Ni3W-W-Ni	0.876582685	-1.417762219	1.388844423	0.710401038	5.198509351	2.067701561	7.64	1.16	1.91	5.77	-1.29	1.38	0.71
Ni3Re-Re-Ni	0.864909369	-1.391156697	1.412775881	0.321990612	4.82048487	1.904993438	7.64	1.16	1.91	5.77	-1.29	1.38	0.71
Ni3Os-Os-Ni	0.874215325	-1.655781895	1.576889836	0.003271588	4.928554724	2.049878045	7.64	1.16	1.91	5.77	-1.29	1.38	0.71
Ni3Ir-Ir-Ni	0.867665666	-1.39232238	1.473888412	-0.214474968	5.168382187	2.049878045	7.64	1.16	1.91	5.77	-1.29	1.38	0.71
Ni3Pt-Pt-Ni	0.876566141	-1.393026218	1.477162247	-0.158589068	5.143661326	2.086815756	7.64	1.16	1.91	5.77	-1.29	1.38	0.71
Cu3Sc-Sc-Cu	0.969404991	-2.96161662	1.056015315	2.858550274	15.50649145	1.607482504	7.73	1.24	1.9	5.3	-2.67	1.41	0.67
Cu3Ti-Ti-Cu	0.969031465	-3.049773023	1.073226012	2.467812336	13.12918879	1.710555465	7.73	1.24	1.9	5.3	-2.67	1.41	0.67
Cu3V-V-Cu	0.968127856	-2.864308408	1.114573572	2.111660476	11.03342598	1.759829537	7.73	1.24	1.9	5.3	-2.67	1.41	0.67
Cu3Mn-Mn-Cu	0.969232825	-2.678020485	1.108835394	1.63075969	9.9143171	1.71610023	7.73	1.24	1.9	5.3	-2.67	1.41	0.67
Cu3Fe-Fe-Cu	0.970439722	-2.561465144	1.06508602	1.512721817	9.912767024	1.864671553	7.73	1.24	1.9	5.3	-2.67	1.41	0.67
Cu3Co-Co-Cu	0.970147754	-2.385622249	1.075544534	1.193401276	8.659180174	1.889973545	7.73	1.24	1.9	5.3	-2.67	1.41	0.67
Cu3Ni-Ni-Cu	0.972368041	-2.19400352	1.072164189	1.178584781	8.331115067	1.904993438	7.73	1.24	1.9	5.3	-2.67	1.41	0.67
Cu3Cu-Cu-Cu	0.972218269	-2.382851666	1.04972135	1.120570468	9.924607231	1.9	7.73	1.24	1.9	5.3	-2.67	1.41	0.67
Cu3Y-Y-Cu	0.967624645	-2.897996646	1.045140695	2.972987315	16.75200738	1.560433476	7.73	1.24	1.9	5.3	-2.67	1.41	0.67
Cu3Zr-Zr-Cu	0.965258332	-3.085241949	1.137289965	2.619119773	13.6970964	1.58965405	7.73	1.24	1.9	5.3	-2.67	1.41	0.67
Cu3Nb-Nb-Cu	0.964397516	-3.090328731	1.189251225	2.143241128	10.95926579	1.743559577	7.73	1.24	1.9	5.3	-2.67	1.41	0.67
Cu3Mo-Mo-Cu	0.966572299	-2.672679276	1.11911492	1.659289467	9.498363206	2.025833162	7.73	1.24	1.9	5.3	-2.67	1.41	0.67
Cu3Ru-Ru-Cu	0.966671017	-2.319152954	1.147974777	0.88976822	7.317774025	2.04450483	7.73	1.24	1.9	5.3	-2.67	1.41	0.67
Cu3Rh-Rh-Cu	0.96904023	-2.122591045	1.118338465	0.770105136	7.396903876	2.081345719	7.73	1.24	1.9	5.3	-2.67	1.41	0.67
Cu3Pd-Pd-Cu	0.974843048	-1.988820888	1.089282345	0.58023413	7.43805623	2.04450483	7.73	1.24	1.9	5.3	-2.67	1.41	0.67
Cu3Ag-Ag-Cu	0.974880046	-2.41959064	1.049409374	0.385307575	10.84777244	1.914941252	7.73	1.24	1.9	5.3	-2.67	1.41	0.67
Cu3La-La-Cu	0.967897022	-1.891067731	0.899958573	3.083428844	19.56841417	1.390332875	7.73	1.24	1.9	5.3	-2.67	1.41	0.67
Cu3Ta-Ta-Cu	0.967154596	-2.609200137	1.062174497	2.017933436	11.73539788	1.738822386	7.73	1.24	1.9	5.3	-2.67	1.41	0.67
Cu3W-W-Cu	0.967042917	-2.467690278	1.063613985	1.525348594	9.665406934	2.060928864	7.73	1.24	1.9	5.3	-2.67	1.41	0.67
Cu3Re-Re-Cu	0.971176189	-2.590921873	1.157567918	0.870100233	6.701022847	1.9	7.73	1.24	1.9	5.3	-2.67	1.41	0.67
Cu3Os-Os-Cu	0.967394263	-2.467843708	1.213981668	0.619033921	7.372688048	2.04450483	7.73	1.24	1.9	5.3	-2.67	1.41	0.67
Cu3Ir-Ir-Cu	0.968223807	-2.243841832	1.188071944	0.355933622	7.277922775	2.04450483	7.73	1.24	1.9	5.3	-2.67	1.41	0.67
Cu3Pt-Pt-Cu	0.969460139	-1.95189833	1.154975831	0.177499007	7.214047702	2.081345719	7.73	1.24	1.9	5.3	-2.67	1.41	0.67
Cu3Au-Au-Cu	0.974573414	-2.041000145	1.075809741	0.143705117	9.261419949	2.118525249	7.73	1.24	1.9	5.3	-2.67	1.41	0.67
Ru3Sc-Sc-Ru	0.754342542	-1.151014432	1.791281929	0.642929227	2.838017769	1.729739865	7.36	1.05	2.2	5.73	-1.41	1.48	1.05
Ru3Ti-Ti-Ru	0.741546938	-1.169762792	2.082088356	0.660622518	2.72021091	1.840652058	7.36	1.05	2.2	5.73	-1.41	1.48	1.05
Ru3V-V-Ru	0.717439473	-1.213288162	2.136552662	0.503417011	2.456264368	1.893673678	7.36	1.05	2.2	5.73	-1.41	1.48	1.05
Ru3Mn-Mn-Ru	0.706497012	-1.409769697	2.060184921	0.353854857	2.556971633	1.846618531	7.36	1.05	2.2	5.73	-1.41	1.48	1.05
Ru3Fe-Fe-Ru	0.715707702	-1.224140334	1.925038365	0.291599576	2.79278591	2.006489472	7.36	1.05	2.2	5.73	-1.41	1.48	1.05
Ru3Co-Co-Ru	0.726682169	-1.305649561	1.955904338	0.237323229	2.752548052	2.033715811	7.36	1.05	2.2	5.73	-1.41	1.48	1.05
Ru3Ni-Ni-Ru	0.719149479	-1.287560722	1.91560769	0.2619546	2.833927426	2.049878045	7.36	1.05	2.2	5.73	-1.41	1.48	1.05
Ru3Cu-Cu-Ru	0.712630701	-1.14088366	1.847565926	0.152594059	3.081030964	2.04450483	7.36	1.05	2.2	5.73	-1.41	1.48	1.05
Ru3Y-Y-Ru	0.749092434	-1.097194306	1.775101364	0.726456025	3.233438917	1.638291793	7.36	1.05	2.2	5.73	-1.41	1.48	1.05
Ru3Zr-Zr-Ru	0.717458724	-1.073939431	2.036196187	0.725022614	3.033568348	1.710555465	7.36	1.05	2.2	5.73	-1.41	1.48	1.05
Ru3Nb-Nb-Ru	0.727521345	-1.135224748	2.142895244	0.549280153	2.67740578	1.876166304	7.36	1.05	2.2	5.73	-1.41	1.48	1.05
Ru3Mo-Mo-Ru	0.720438936	-1.195539457	2.180663937	0.369374798	2.463984439	2.179908255	7.36	1.05	2.2	5.73	-1.41	1.48	1.05
Ru3Ru-Ru-Ru	0.705539272	-1.409575583	2.078104787	0.105847951	2.472162631	2.2	7.36	1.05	2.2	5.73	-1.41	1.48	1.05
Ru3Rh-Rh-Ru	0.712262734	-1.365682905	2.018589705	0.052174832	2.622381216	2.239642829	7.36	1.05	2.2	5.73	-1.41	1.48	1.05
Ru3Pd-Pd-Ru	0.705612171	-1.251036715	1.909820097	-0.017394782	2.819433607	2.2	7.36	1.05	2.2	5.73	-1.41	1.48	1.05
Ru3Ag-Ag-Ru	0.708727269	-1.059987416	1.837080868	-0.165123594	3.506843785	2.060582442	7.36	1.05	2.2	5.73	-1.41	1.48	1.05
Ru3La-La-Ru	0.626368787	-0.394942863	1.782152831	0.675287424	3.431161024	1.555634919	7.36	1.05	2.2	5.73	-1.41	1.48	1.05
Ru3Ta-Ta-Ru	0.721373871	-1.155010235	2.229750597	0.524512638	2.740338691	1.816590212	7.36	1.05	2.2	5.73	-1.41	1.48	1.05
Ru3W-W-Ru	0.717936239	-1.180638735	2.286964357	0.339228774	2.556798767	2.278596059	7.36	1.05	2.2	5.73	-1.41	1.48	1.05
Ru3Re-Re-Ru	0.718291488	-1.478718769	2.341638588	0.169337819	2.482790344	2.04450483	7.36	1.05	2.2	5.73	-1.41	1.48	1.05
Ru3Os-Os-Ru	0.713581266	-1.547443697	2.2792175	-0.008021345	2.553278205	2.2	7.36	1.05	2.2	5.73	-1.41	1.48	1.05
Ru3Ir-Ir-Ru	0.706961276	-1.468894005	2.190943195	-0.128656855	2.723957325	2.2	7.36	1.05	2.2	5.73	-1.41	1.48	1.05
Ru3Pt-Pt-Ru	0.707548203	-1.383924345	2.090190556	-0.186633634	2.905453388	2.239642829	7.36	1.05	2.2	5.73	-1.41	1.48	1.05
Ru3Au-Au-Ru	0.713301717	-1.193994676	1.961728203	-0.310244047	3.401419627	2.363895091	7.36	1.05	2.2	5.73	-1.41	1.48	1.05
Rh3Sc-Sc-Rh	0.814802121	-1.490381354	1.923166155	1.058005685	3.787031505	1.760908856	7.46	1.14	2.28	5.91	-1.73	1.49	0.99
Rh3Ti-Ti-Rh	0.816953471	-1.776522671	1.930025173	0.925597766	3.44776915	1.873819628	7.46	1.14	2.28	5.91	-1.73	1.49	0.99
Rh3V-V-Rh	0.800135605	-1.811645179	1.975173077	0.778375663	3.167307127	1.92779667	7.46	1.14	2.28	5.91	-1.73	1.49	0.99
Rh3Mn-Mn-Rh	0.787338272	-1.844614553	1.911819733	0.590027384	3.16769239	1.879893614	7.46	1.14	2.28	5.91	-1.73	1.49	0.99
Rh3Fe-Fe-Rh	0.796503162	-1.432678863	1.804729247	0.480427183	3.340094037	2.042645344	7.46	1.14	2.28	5.91	-1.73	1.49	0.99
Rh3Co-Co-Rh	0.797338626	-1.57352127	1.840417188	0.432310449	3.263278457	2.070362287	7.46	1.14	2.28	5.91	-1.73	1.49	0.99
Rh3Ni-Ni-Rh	0.792589185	-1.540758596	1.803057621	0.452089766	3.333521942	2.086815756	7.46	1.14	2.28	5.91	-1.73	1.49	0.99
Rh3Cu-Cu-Rh	0.790658006	-1.324026109	1.736344563	0.334977264	3.505239955	2.081345719	7.46	1.14	2.28	5.91	-1.73	1.49	0.99
Rh3Y-Y-Rh	0.805997575	-1.342964397	1.849478863	1.065244692	3.959548559	1.726771371	7.46	1.14	2.28	5.91	-1.73	1.49	0.99
Rh3Zr-Zr-Rh	0.805707371	-1.532548686	1.955759988	0.937946468	3.570056163	1.741378764	7.46	1.14	2.28	5.91	-1.73	1.49	0.99
Rh3Nb-Nb-Rh	0.802049316	-1.674503681	2.025815284	0.78447203	3.248546014	1.909973822	7.46	1.14	2.28	5.91	-1.73	1.49	0.99
Rh3Mo-Mo-Rh	0.797147406	-1.806085625	2.041445408	0.604345689	2.990280301	2.219189041	7.46	1.14	2.28	5.91	-1.73	1.49	0.99
Rh3Ru-Ru-Rh	0.788654316	-1.764669312	1.931213068	0.315214483	2.957358537	2.239642829	7.46	1.14	2.28	5.91	-1.73	1.49	0.99
Rh3Rh-Rh-Rh	0.787190634	-1.676398578	1.87550915	0.255574308	3.111727326	2.28	7.46	1.14	2.28	5.91	-1.73	1.49	0.99
Rh3Pd-Pd-Rh	0.798837304	-1.488016932	1.77774911	0.193689168	3.272925222	2.239642829	7.46	1.14	2.28	5.91	-1.73	1.49	0.99
Rh3Ag-Ag-Rh	0.800031785	-1.276478242	1.719209612	0.015116755	3.903678062	2.09771304	7.46	1.14	2.28	5.91	-1.73	1.49	0.99
Rh3La-La-Rh	0.774387946	-0.944376224	1.700171303	1.186061152	4.375658812	1.583666632	7.46	1.14	2.28	5.91	-1.73	1.49	0.99
Rh3Ta-Ta-Rh	0.801684507	-1.732734844	2.106291109	0.766038389	3.303107855	1.849324201	7.46	1.14	2.28	5.91	-1.73	1.49	0.99
Rh3W-W-Rh	0.797005644	-1.858596381	2.142995928	0.579494144	3.055495126	2.319655147	7.46	1.14	2.28	5.91	-1.73	1.49	0.99
Rh3Re-Re-Rh	0.795168734	-2.009571799	2.158342409	0.374822544	2.908516659	2.081345719	7.46	1.14	2.28	5.91	-1.73	1.49	0.99
Rh3Os-Os-Rh	0.793565148	-1.968125128	2.114595275	0.196128425	2.943710958	2.239642829	7.46	1.14	2.28	5.91	-1.73	1.49	0.99
Rh3Ir-Ir-Rh	0.791979639	-1.846222337	2.021278198	0.071346129	3.096401204	2.239642829	7.46	1.14	2.28	5.91	-1.73	1.49	0.99
Rh3Pt-Pt-Rh	0.795148004	-1.610347775	1.916638269	-0.015072786	3.259631508	2.28	7.46	1.14	2.28	5.91	-1.73	1.49	0.99
Rh3Au-Au-Rh	0.794320742	-1.35726737	1.808190949	-0.151358578	3.687040056	2.406491222	7.46	1.14	2.28	5.91	-1.73	1.49	0.99
Pd3Sc-Sc-Pd	0.923673065	-2.753121758	1.543244946	1.817864852	7.172340735	1.729739865	8.34	0.56	2.2	5.9	-1.83	1.52	0.94
Pd3Ti-Ti-Pd	0.924729495	-2.773775894	1.509748872	1.555253723	6.185716468	1.840652058	8.34	0.56	2.2	5.9	-1.83	1.52	0.94
Pd3V-V-Pd	0.916461587	-2.634815148	1.565653955	1.333905565	5.343793958	1.893673678	8.34	0.56	2.2	5.9	-1.83	1.52	0.94
Pd3Cr-Cr-Pd	0.917645826	-2.539914228	1.556440506	1.200396625	5.058888338	1.91102067	8.34	0.56	2.2	5.9	-1.83	1.52	0.94
Pd3Mn-Mn-Pd	0.910904631	-2.481036557	1.549988976	1.049478304	4.884465037	1.846618531	8.34	0.56	2.2	5.9	-1.83	1.52	0.94
Pd3Fe-Fe-Pd	0.924047514	-2.22894769	1.46290618	0.914327949	5.08440588	2.006489472	8.34	0.56	2.2	5.9	-1.83	1.52	0.94
Pd3Co-Co-Pd	0.920146569	-2.203109039	1.482435653	0.777633694	4.685526709	2.033715811	8.34	0.56	2.2	5.9	-1.83	1.52	0.94
Pd3Ni-Ni-Pd	0.920476096	-2.008313564	1.460229617	0.771908062	4.656561978	2.049878045	8.34	0.56	2.2	5.9	-1.83	1.52	0.94
Pd3Cu-Cu-Pd	0.927829048	-1.764359355	1.4245721	0.610399222	4.601516108	2.04450483	8.34	0.56	2.2	5.9	-1.83	1.52	0.94
Pd3Y-Y-Pd	0.920565002	-2.523317067	1.532306985	1.850752995	7.387338474	1.638291793	8.34	0.56	2.2	5.9	-1.83	1.52	0.94
Pd3Zr-Zr-Pd	0.915846388	-2.655561442	1.613857234	1.640559287	6.434294263	1.710555465	8.34	0.56	2.2	5.9	-1.83	1.52	0.94
Pd3Nb-Nb-Pd	0.913951632	-2.660311379	1.6480903	1.352900792	5.383986544	1.876166304	8.34	0.56	2.2	5.9	-1.83	1.52	0.94
Pd3Mo-Mo-Pd	0.914619785	-2.542168664	1.641907145	1.076080413	4.653546451	2.179908255	8.34	0.56	2.2	5.9	-1.83	1.52	0.94
Pd3Ru-Ru-Pd	0.912018814	-2.289489995	1.55943139	0.623721291	3.877715455	2.2	8.34	0.56	2.2	5.9	-1.83	1.52	0.94
Pd3Rh-Rh-Pd	0.911256364	-2.026374334	1.50849993	0.548888995	4.041047024	2.239642829	8.34	0.56	2.2	5.9	-1.83	1.52	0.94
Pd3Pd-Pd-Pd	0.918604301	-1.716401605	1.426284036	0.393595673	3.988153141	2.2	8.34	0.56	2.2	5.9	-1.83	1.52	0.94
Pd3Ag-Ag-Pd	0.930059529	-1.639161452	1.415901556	0.11404639	5.007992574	2.060582442	8.34	0.56	2.2	5.9	-1.83	1.52	0.94
Pd3La-La-Pd	0.922715856	-2.460350426	1.487237846	1.730382572	7.718201311	1.616707942	8.34	0.56	2.2	5.9	-1.83	1.52	0.94
Pd3Ta-Ta-Pd	0.912178624	-2.742840811	1.727602243	1.32858968	5.454171789	1.816590212	8.34	0.56	2.2	5.9	-1.83	1.52	0.94
Pd3W-W-Pd	0.914047796	-2.669881938	1.741596905	1.040254782	4.701439202	2.278596059	8.34	0.56	2.2	5.9	-1.83	1.52	0.94
Pd3Re-Re-Pd	0.914655002	-2.692755792	1.767494084	0.722923035	4.057775946	2.04450483	8.34	0.56	2.2	5.9	-1.83	1.52	0.94
Pd3Os-Os-Pd	0.910970471	-2.534232735	1.737002974	0.446543147	3.767472498	2.2	8.34	0.56	2.2	5.9	-1.83	1.52	0.94
Pd3Ir-Ir-Pd	0.911931281	-2.243086036	1.648482265	0.302039654	3.863483301	2.2	8.34	0.56	2.2	5.9	-1.83	1.52	0.94
Pd3Pt-Pt-Pd	0.913799389	-1.868509287	1.550786009	0.149221083	3.923522408	2.239642829	8.34	0.56	2.2	5.9	-1.83	1.52	0.94
Pd3Au-Au-Pd	0.926125437	-1.683735762	1.503908322	-0.092041701	4.505426103	2.363895091	8.34	0.56	2.2	5.9	-1.83	1.52	0.94
Ag3Sc-Sc-Ag	0.977757514	-4.593612345	1.21609357	3.694907762	20.35387381	1.620123452	7.58	1.3	1.93	5.01	-4.3	1.59	0.89
Ag3Ti-Ti-Ag	0.981137615	-4.414807476	1.151770301	3.436709606	18.9722778	1.724006961	7.58	1.3	1.93	5.01	-4.3	1.59	0.89
Ag3V-V-Ag	0.978955268	-4.263770495	1.222998563	3.222213844	16.88384712	1.773668515	7.58	1.3	1.93	5.01	-4.3	1.59	0.89
Ag3Cr-Cr-Ag	0.979737298	-4.201126652	1.211755555	3.294635066	18.05700724	1.789916199	7.58	1.3	1.93	5.01	-4.3	1.59	0.89
Ag3Mn-Mn-Ag	0.978475836	-4.330257776	1.232096387	3.132598039	17.38951603	1.729595328	7.58	1.3	1.93	5.01	-4.3	1.59	0.89
Ag3Fe-Fe-Ag	0.981258661	-4.119995335	1.156318114	3.049183509	17.64885555	1.879334989	7.58	1.3	1.93	5.01	-4.3	1.59	0.89
Ag3Co-Co-Ag	0.980609507	-3.976015407	1.189158111	2.785279593	15.52712122	1.904835951	7.58	1.3	1.93	5.01	-4.3	1.59	0.89
Ag3Ni-Ni-Ag	0.980679426	-3.806267772	1.178151539	2.821126492	15.5587005	1.919973958	7.58	1.3	1.93	5.01	-4.3	1.59	0.89
Ag3Cu-Cu-Ag	0.981267234	-4.037838116	1.179414785	2.798022533	16.33311266	1.914941252	7.58	1.3	1.93	5.01	-4.3	1.59	0.89
Ag3Y-Y-Ag	0.974833171	-4.569044379	1.253741462	3.827300626	21.25151238	1.534470593	7.58	1.3	1.93	5.01	-4.3	1.59	0.89
Ag3Zr-Zr-Ag	0.969348574	-4.521304289	1.29275643	3.486398529	18.52190661	1.602154799	7.58	1.3	1.93	5.01	-4.3	1.59	0.89
Ag3Nb-Nb-Ag	0.976743868	-4.320111088	1.289538957	3.19930717	16.46939661	1.757270611	7.58	1.3	1.93	5.01	-4.3	1.59	0.89
Ag3Mo-Mo-Ag	0.977086229	-4.249692322	1.287282994	2.824014801	14.09268225	2.041763943	7.58	1.3	1.93	5.01	-4.3	1.59	0.89
Ag3Ru-Ru-Ag	0.980692686	-3.773490611	1.198355645	2.262021719	11.72918827	2.060582442	7.58	1.3	1.93	5.01	-4.3	1.59	0.89
Ag3Rh-Rh-Ag	0.980403995	-3.587795947	1.178441841	2.274158217	11.79920112	2.09771304	7.58	1.3	1.93	5.01	-4.3	1.59	0.89
Ag3Pd-Pd-Ag	0.983729114	-3.501166196	1.123719344	2.227722719	12.02748519	2.060582442	7.58	1.3	1.93	5.01	-4.3	1.59	0.89
Ag3Ag-Ag-Ag	0.979921661	-3.975948387	1.130792263	2.415851835	16.56635697	1.93	7.58	1.3	1.93	5.01	-4.3	1.59	0.89
Ag3La-La-Ag	0.975636515	-4.44281827	1.214322082	3.87829709	22.69415063	1.563131716	7.58	1.3	1.93	5.01	-4.3	1.59	0.89
Ag3Ta-Ta-Ag	0.974675207	-4.420562855	1.365297611	3.07911292	15.55337574	1.701469953	7.58	1.3	1.93	5.01	-4.3	1.59	0.89
Ag3W-W-Ag	0.97539397	-4.345499692	1.377330373	2.706686179	13.29972669	2.134197742	7.58	1.3	1.93	5.01	-4.3	1.59	0.89
Ag3Re-Re-Ag	0.982773507	-4.151029049	1.251087342	1.910056127	8.873991524	1.914941252	7.58	1.3	1.93	5.01	-4.3	1.59	0.89
Ag3Os-Os-Ag	0.980826508	-3.838524131	1.258826836	2.010982239	11.08620862	2.060582442	7.58	1.3	1.93	5.01	-4.3	1.59	0.89
Ag3Ir-Ir-Ag	0.980017773	-3.678368768	1.249535677	1.898638356	10.53910214	2.060582442	7.58	1.3	1.93	5.01	-4.3	1.59	0.89
Ag3Pt-Pt-Ag	0.982096028	-3.4625556	1.203914636	1.892189962	10.5928674	2.09771304	7.58	1.3	1.93	5.01	-4.3	1.59	0.89
Ag3Au-Au-Ag	0.983005977	-3.86748783	1.195936061	1.923149542	12.85673469	2.214091236	7.58	1.3	1.93	5.01	-4.3	1.59	0.89
Os3Sc-Sc-Os	0.699874705	-1.214889796	2.316209257	0.619380749	2.854940889	1.729739865	8.7	1.1	2.2	6.25	-1.5	1.49	1.13
Os3Ti-Ti-Os	0.713301697	-1.349589344	2.396585758	0.535914909	2.56649624	1.840652058	8.7	1.1	2.2	6.25	-1.5	1.49	1.13
Os3V-V-Os	0.691490662	-1.32336179	2.510407133	0.404157251	2.28613388	1.893673678	8.7	1.1	2.2	6.25	-1.5	1.49	1.13
Os3Cr-Cr-Os	0.684814824	-1.402413531	2.490336716	0.305678458	2.232649162	1.91102067	8.7	1.1	2.2	6.25	-1.5	1.49	1.13
Os3Mn-Mn-Os	0.669230761	-1.523557469	2.487210563	0.279254976	2.291199591	1.846618531	8.7	1.1	2.2	6.25	-1.5	1.49	1.13
Os3Fe-Fe-Os	0.683670971	-1.406808055	2.336978917	0.236908492	2.461006987	2.006489472	8.7	1.1	2.2	6.25	-1.5	1.49	1.13
Os3Co-Co-Os	0.678337612	-1.467173288	2.371299023	0.201333982	2.438129815	2.033715811	8.7	1.1	2.2	6.25	-1.5	1.49	1.13
Os3Ni-Ni-Os	0.680129598	-1.476904543	2.337096501	0.215559182	2.500262049	2.049878045	8.7	1.1	2.2	6.25	-1.5	1.49	1.13
Os3Cu-Cu-Os	0.684722627	-1.309500889	2.262106254	0.099462336	2.667081486	2.04450483	8.7	1.1	2.2	6.25	-1.5	1.49	1.13
Os3Y-Y-Os	0.685217109	-1.129280717	2.241394131	0.620575378	3.04920172	1.638291793	8.7	1.1	2.2	6.25	-1.5	1.49	1.13
Os3Zr-Zr-Os	0.686791888	-1.261688494	2.394649327	0.570224353	2.757062996	1.710555465	8.7	1.1	2.2	6.25	-1.5	1.49	1.13
Os3Nb-Nb-Os	0.689318578	-1.257063828	2.530218702	0.448375115	2.463028367	1.876166304	8.7	1.1	2.2	6.25	-1.5	1.49	1.13
Os3Mo-Mo-Os	0.686732305	-1.297612957	2.606586066	0.307689382	2.261427337	2.179908255	8.7	1.1	2.2	6.25	-1.5	1.49	1.13
Os3Ru-Ru-Os	0.671869559	-1.552338364	2.521606949	0.094112796	2.223456248	2.2	8.7	1.1	2.2	6.25	-1.5	1.49	1.13
Os3Rh-Rh-Os	0.670841887	-1.517709562	2.468726242	0.054938944	2.315476808	2.239642829	8.7	1.1	2.2	6.25	-1.5	1.49	1.13
Os3Pd-Pd-Os	0.675830239	-1.412286705	2.326748468	-0.012568232	2.48337664	2.2	8.7	1.1	2.2	6.25	-1.5	1.49	1.13
Os3Ag-Ag-Os	0.685373828	-1.24759438	2.225807879	-0.129668291	2.899101751	2.060582442	8.7	1.1	2.2	6.25	-1.5	1.49	1.13
Os3La-La-Os	0.655501056	-0.908333175	2.126372079	0.425712984	3.262161202	1.616707942	8.7	1.1	2.2	6.25	-1.5	1.49	1.13
Os3Ta-Ta-Os	0.693003128	-1.356201872	2.605922014	0.450583836	2.516938016	1.816590212	8.7	1.1	2.2	6.25	-1.5	1.49	1.13
Os3W-W-Os	0.691543479	-1.346303876	2.71177214	0.307207134	2.326830902	2.278596059	8.7	1.1	2.2	6.25	-1.5	1.49	1.13
Os3Re-Re-Os	0.684650026	-1.625927566	2.806319366	0.170421014	2.220243659	2.04450483	8.7	1.1	2.2	6.25	-1.5	1.49	1.13
Os3Os-Os-Os	0.678116176	-1.667389865	2.736830212	0.027647659	2.256209078	2.2	8.7	1.1	2.2	6.25	-1.5	1.49	1.13
Os3Ir-Ir-Os	0.672902266	-1.622874203	2.644761648	-0.071798576	2.359903562	2.2	8.7	1.1	2.2	6.25	-1.5	1.49	1.13
Os3Pt-Pt-Os	0.676858446	-1.587681787	2.533276355	-0.111286682	2.467898858	2.239642829	8.7	1.1	2.2	6.25	-1.5	1.49	1.13
Os3Au-Au-Os	0.684485612	-1.391119168	2.366425977	-0.237892645	2.804338082	2.363895091	8.7	1.1	2.2	6.25	-1.5	1.49	1.13
Ir3Sc-Sc-Ir	0.79925494	-1.640655121	2.235306372	0.849353473	3.304906709	1.729739865	9.1	1.57	2.2	6.63	-2.11	1.5	1.08
Ir3Ti-Ti-Ir	0.79811829	-1.926544472	2.272350883	0.758763793	3.027762385	1.840652058	9.1	1.57	2.2	6.63	-2.11	1.5	1.08
Ir3V-V-Ir	0.779009216	-1.968724372	2.311256249	0.632445503	2.784385098	1.893673678	9.1	1.57	2.2	6.63	-2.11	1.5	1.08
Ir3Mn-Mn-Ir	0.775215085	-1.89383494	2.259938705	0.497639577	2.839974692	1.846618531	9.1	1.57	2.2	6.63	-2.11	1.5	1.08
Ir3Fe-Fe-Ir	0.779234109	-1.762495503	2.141713607	0.404685836	2.933577373	2.006489472	9.1	1.57	2.2	6.63	-2.11	1.5	1.08
Ir3Co-Co-Ir	0.773877247	-1.80766869	2.166826442	0.350194321	2.850855985	2.033715811	9.1	1.57	2.2	6.63	-2.11	1.5	1.08
Ir3Ni-Ni-Ir	0.770501032	-1.798360354	2.129559661	0.364603759	2.923036686	2.049878045	9.1	1.57	2.2	6.63	-2.11	1.5	1.08
Ir3Cu-Cu-Ir	0.778817287	-1.646091913	2.07970198	0.251610795	3.035739257	2.04450483	9.1	1.57	2.2	6.63	-2.11	1.5	1.08
Ir3Y-Y-Ir	0.783102	-1.537304482	2.142397594	0.84658315	3.52459044	1.638291793	9.1	1.57	2.2	6.63	-2.11	1.5	1.08
Ir3Zr-Zr-Ir	0.784885906	-1.622143415	2.269655397	0.74813663	3.12765036	1.710555465	9.1	1.57	2.2	6.63	-2.11	1.5	1.08
Ir3Nb-Nb-Ir	0.781894777	-1.778291966	2.360625004	0.641133489	2.85808853	1.876166304	9.1	1.57	2.2	6.63	-2.11	1.5	1.08
Ir3Mo-Mo-Ir	0.775227822	-1.944919906	2.384394764	0.497139199	2.641577775	2.179908255	9.1	1.57	2.2	6.63	-2.11	1.5	1.08
Ir3Ru-Ru-Ir	0.76763738	-1.968156575	2.277933447	0.264041909	2.581591146	2.2	9.1	1.57	2.2	6.63	-2.11	1.5	1.08
Ir3Rh-Rh-Ir	0.769203738	-1.937692158	2.22936522	0.21640172	2.687009671	2.239642829	9.1	1.57	2.2	6.63	-2.11	1.5	1.08
Ir3Pd-Pd-Ir	0.77467171	-1.737287937	2.121225589	0.140929609	2.810727263	2.2	9.1	1.57	2.2	6.63	-2.11	1.5	1.08
Ir3Ag-Ag-Ir	0.781380458	-1.548162939	2.044191229	-0.002280455	3.23731795	2.060582442	9.1	1.57	2.2	6.63	-2.11	1.5	1.08
Ir3La-La-Ir	0.72566883	-1.230878562	2.073117028	0.689578401	3.802570158	1.616707942	9.1	1.57	2.2	6.63	-2.11	1.5	1.08
Ir3Ta-Ta-Ir	0.78206373	-1.862077125	2.447315016	0.638408404	2.896424421	1.816590212	9.1	1.57	2.2	6.63	-2.11	1.5	1.08
Ir3W-W-Ir	0.777787568	-2.04495662	2.505680258	0.495019856	2.683369903	2.278596059	9.1	1.57	2.2	6.63	-2.11	1.5	1.08
Ir3Re-Re-Ir	0.774270713	-2.222668507	2.524430208	0.337030339	2.557649365	2.04450483	9.1	1.57	2.2	6.63	-2.11	1.5	1.08
Ir3Os-Os-Ir	0.771939144	-2.173663792	2.480744542	0.189081292	2.53755615	2.2	9.1	1.57	2.2	6.63	-2.11	1.5	1.08
Ir3Ir-Ir-Ir	0.768032422	-2.102562637	2.400169288	0.078516775	2.620169042	2.2	9.1	1.57	2.2	6.63	-2.11	1.5	1.08
Ir3Pt-Pt-Ir	0.770730201	-1.90323578	2.289713356	0.010434775	2.713650855	2.239642829	9.1	1.57	2.2	6.63	-2.11	1.5	1.08
Ir3Au-Au-Ir	0.777994995	-1.654577088	2.157535778	-0.132778319	3.042622156	2.363895091	9.1	1.57	2.2	6.63	-2.11	1.5	1.08
Pt3Sc-Sc-Pt	0.898300874	-2.779771363	1.921383983	1.366200485	5.059020968	1.760908856	9	2.13	2.28	6.74	-2.25	1.53	1.04
Pt3Ti-Ti-Pt	0.898439268	-2.89811547	1.887667368	1.212144526	4.62845073	1.873819628	9	2.13	2.28	6.74	-2.25	1.53	1.04
Pt3V-V-Pt	0.876007983	-2.783604569	1.95052564	1.047223271	4.119415472	1.92779667	9	2.13	2.28	6.74	-2.25	1.53	1.04
Pt3Cr-Cr-Pt	0.889264281	-2.716623402	1.932453697	0.952281726	3.954928786	1.945456245	9	2.13	2.28	6.74	-2.25	1.53	1.04
Pt3Mn-Mn-Pt	0.878537876	-2.477684892	1.930069651	0.874027924	3.997780843	1.879893614	9	2.13	2.28	6.74	-2.25	1.53	1.04
Pt3Fe-Fe-Pt	0.893932242	-2.31955999	1.823594702	0.729380652	3.968400678	2.042645344	9	2.13	2.28	6.74	-2.25	1.53	1.04
Pt3Co-Co-Pt	0.890705393	-2.358800708	1.835410778	0.64239944	3.78823653	2.070362287	9	2.13	2.28	6.74	-2.25	1.53	1.04
Pt3Ni-Ni-Pt	0.888736019	-2.216406009	1.814283255	0.635837965	3.756359539	2.086815756	9	2.13	2.28	6.74	-2.25	1.53	1.04
Pt3Cu-Cu-Pt	0.899434432	-1.971463223	1.772383021	0.491679171	3.730273831	2.081345719	9	2.13	2.28	6.74	-2.25	1.53	1.04
Pt3Y-Y-Pt	0.895763893	-2.491765123	1.893107497	1.377924	5.208053858	1.667812939	9	2.13	2.28	6.74	-2.25	1.53	1.04
Pt3Zr-Zr-Pt	0.887522645	-2.700873489	1.989283433	1.259064009	4.719949954	1.741378764	9	2.13	2.28	6.74	-2.25	1.53	1.04
Pt3Nb-Nb-Pt	0.881743805	-2.794522816	2.020313682	1.068423549	4.163329281	1.909973822	9	2.13	2.28	6.74	-2.25	1.53	1.04
Pt3Mo-Mo-Pt	0.880154673	-2.743247814	2.033318498	0.877638702	3.730844165	2.219189041	9	2.13	2.28	6.74	-2.25	1.53	1.04
Pt3Ru-Ru-Pt	0.87654898	-2.47741021	1.917869482	0.560072263	3.35906339	2.239642829	9	2.13	2.28	6.74	-2.25	1.53	1.04
Pt3Rh-Rh-Pt	0.876739456	-2.288937611	1.878526624	0.489813891	3.398424124	2.28	9	2.13	2.28	6.74	-2.25	1.53	1.04
Pt3Pd-Pd-Pt	0.883446572	-1.950638006	1.778195163	0.365674525	3.406199963	2.239642829	9	2.13	2.28	6.74	-2.25	1.53	1.04
Pt3Ag-Ag-Pt	0.900839378	-1.802808306	1.726465539	0.155960047	3.888446737	2.09771304	9	2.13	2.28	6.74	-2.25	1.53	1.04
Pt3La-La-Pt	0.898179056	-2.382288523	1.840190532	1.255304949	5.54593707	1.649109303	9	2.13	2.28	6.74	-2.25	1.53	1.04
Pt3Ta-Ta-Pt	0.880144359	-2.881790356	2.109020372	1.059275845	4.191446167	1.849324201	9	2.13	2.28	6.74	-2.25	1.53	1.04
Pt3W-W-Pt	0.879761077	-2.861667035	2.14554781	0.867541867	3.753057161	2.319655147	9	2.13	2.28	6.74	-2.25	1.53	1.04
Pt3Re-Re-Pt	0.900641816	-2.986586657	1.992204338	0.421603479	2.81424847	2.081345719	9	2.13	2.28	6.74	-2.25	1.53	1.04
Pt3Os-Os-Pt	0.877057764	-2.720945068	2.086216466	0.454325005	3.213324277	2.239642829	9	2.13	2.28	6.74	-2.25	1.53	1.04
Pt3Ir-Ir-Pt	0.878613626	-2.492919459	2.019912229	0.322869709	3.195249952	2.239642829	9	2.13	2.28	6.74	-2.25	1.53	1.04
Pt3Pt-Pt-Pt	0.877843237	-2.112425832	1.898173864	0.207831109	3.249565855	2.28	9	2.13	2.28	6.74	-2.25	1.53	1.04
Pt3Au-Au-Pt	0.896116908	-1.889203351	1.820301555	0.026281131	3.60717057	2.406491222	9	2.13	2.28	6.74	-2.25	1.53	1.04
Au3Sc-Sc-Au	0.959991099	-4.214642124	1.530167634	2.539399436	11.39903791	1.858601625	9.23	2.31	2.54	6.01	-3.56	1.59	1.01
Au3Ti-Ti-Au	0.964015455	-4.153680145	1.487819605	2.300443256	10.22107907	1.977776529	9.23	2.31	2.54	6.01	-3.56	1.59	1.01
Au3V-V-Au	0.957177621	-3.985562897	1.553556653	2.106209776	8.914042093	2.034748142	9.23	2.31	2.54	6.01	-3.56	1.59	1.01
Au3Cr-Cr-Au	0.958128811	-3.907663118	1.539639716	1.882801552	8.062345172	2.053387445	9.23	2.31	2.54	6.01	-3.56	1.59	1.01
Au3Mn-Mn-Au	0.955890335	-4.018833559	1.551365567	1.994503913	9.071947094	1.984187491	9.23	2.31	2.54	6.01	-3.56	1.59	1.01
Au3Fe-Fe-Au	0.962751024	-3.735337021	1.448305826	1.859858311	8.965541913	2.15596846	9.23	2.31	2.54	6.01	-3.56	1.59	1.01
Au3Co-Co-Au	0.96209913	-3.644509379	1.485926508	1.707661203	8.146848329	2.185223101	9.23	2.31	2.54	6.01	-3.56	1.59	1.01
Au3Ni-Ni-Au	0.962803913	-3.40976263	1.465433015	1.708874657	8.074632304	2.202589385	9.23	2.31	2.54	6.01	-3.56	1.59	1.01
Au3Cu-Cu-Au	0.965320187	-3.595904944	1.457799703	1.644271783	8.28031047	2.196815878	9.23	2.31	2.54	6.01	-3.56	1.59	1.01
Au3Y-Y-Au	0.955585813	-4.167841853	1.531747226	2.605226212	11.85750326	1.760340876	9.23	2.31	2.54	6.01	-3.56	1.59	1.01
Au3Zr-Zr-Au	0.952976734	-4.165050675	1.604447597	2.38493534	10.43581888	1.83798803	9.23	2.31	2.54	6.01	-3.56	1.59	1.01
Au3Nb-Nb-Au	0.956401802	-3.994539461	1.624914115	2.124774512	8.943335156	2.015936507	9.23	2.31	2.54	6.01	-3.56	1.59	1.01
Au3Mo-Mo-Au	0.955910785	-3.972568464	1.630281396	1.825706418	7.506980482	2.342306556	9.23	2.31	2.54	6.01	-3.56	1.59	1.01
Au3Ru-Ru-Au	0.961336577	-3.388988834	1.511259955	1.359075524	6.177867525	2.363895091	9.23	2.31	2.54	6.01	-3.56	1.59	1.01
Au3Rh-Rh-Au	0.96156045	-3.19212943	1.475685156	1.370179634	6.378949117	2.406491222	9.23	2.31	2.54	6.01	-3.56	1.59	1.01
Au3Pd-Pd-Au	0.968515937	-2.947424678	1.397129095	1.27263273	6.385091572	2.363895091	9.23	2.31	2.54	6.01	-3.56	1.59	1.01
Au3Ag-Ag-Au	0.968923182	-3.478806439	1.402819999	1.286543577	8.236026334	2.214091236	9.23	2.31	2.54	6.01	-3.56	1.59	1.01
Au3La-La-Au	0.956318076	-4.027146342	1.492379074	2.588465971	12.55076759	1.85585196	9.23	2.31	2.54	6.01	-3.56	1.59	1.01
Au3Ta-Ta-Au	0.953274818	-4.095943768	1.711775217	2.075124953	8.693423295	1.95192213	9.23	2.31	2.54	6.01	-3.56	1.59	1.01
Au3W-W-Au	0.953476189	-4.077424585	1.741381382	1.761203621	7.215416099	2.448346381	9.23	2.31	2.54	6.01	-3.56	1.59	1.01
Au3Re-Re-Au	0.956446234	-3.869023544	1.709350264	1.39855577	6.022824316	2.196815878	9.23	2.31	2.54	6.01	-3.56	1.59	1.01
Au3Os-Os-Au	0.961770679	-3.501437253	1.61103002	1.125656397	5.722189602	2.363895091	9.23	2.31	2.54	6.01	-3.56	1.59	1.01
Au3Ir-Ir-Au	0.960251349	-3.344214045	1.590447973	1.091555585	5.580576299	2.363895091	9.23	2.31	2.54	6.01	-3.56	1.59	1.01
Au3Pt-Pt-Au	0.965620934	-2.990925666	1.489124829	1.053373241	5.803751939	2.406491222	9.23	2.31	2.54	6.01	-3.56	1.59	1.01
Au3Au-Au-Au	0.968676569	-3.329924904	1.45273641	1.015651794	6.881338766	2.54	9.23	2.31	2.54	6.01	-3.56	1.59	1.01
Co2V2-V-Co	0.785057668	-1.190814812	1.661700259	0.737348986	3.396689784	1.694683419	7.88	0.66	1.88	5.76	-1.17	1.39	0.76
Co2Cr2-Cr-Co	0.779188373	-1.18721008	1.630345802	0.530125383	3.390013721	1.717310922	7.88	0.66	1.88	5.76	-1.17	1.39	0.76
Co2Mn2-Mn-Co	0.768913794	-1.339071133	1.643272976	0.393901621	3.542040627	1.620601343	7.88	0.66	1.88	5.76	-1.17	1.39	0.76
Co2Fe2-Fe-Co	0.776117071	-1.21369672	1.689096113	0.431389436	3.430197324	1.844858738	7.88	0.66	1.88	5.76	-1.17	1.39	0.76
Co2Co2-Co-Co	0.779304241	-1.215828317	1.523422091	0.208236191	3.998128464	1.88	7.88	0.66	1.88	5.76	-1.17	1.39	0.76
Co2Ni2-Ni-Co	0.762514603	-1.441286871	1.714084158	0.317226227	3.258906379	1.903034709	7.88	0.66	1.88	5.76	-1.17	1.39	0.76
Co2Cu2-Cu-Co	0.770978525	-1.176411774	1.610236724	0.082778538	3.757278886	1.893977762	7.88	0.66	1.88	5.76	-1.17	1.39	0.76
Co2Y2-Y-Co	0.370654775	0.550700497	1.326085337	1.065674882	4.10417767	1.409156312	7.88	0.66	1.88	5.76	-1.17	1.39	0.76
Co2Zr2-Zr-Co	0.772473456	-0.973410435	1.623886207	1.400559312	4.550378431	1.372511025	7.88	0.66	1.88	5.76	-1.17	1.39	0.76
Co2Nb2-Nb-Co	0.784065977	-1.103061718	1.741937292	0.746766655	3.838500713	1.679311812	7.88	0.66	1.88	5.76	-1.17	1.39	0.76
Co2Mo2-Mo-Co	0.779835248	-1.129040535	1.686962857	0.407229531	3.367031079	2.062315554	7.88	0.66	1.88	5.76	-1.17	1.39	0.76
Co2Ru2-Ru-Co	0.772154369	-1.364765106	1.691855582	0.013134715	3.258878498	2.087698297	7.88	0.66	1.88	5.76	-1.17	1.39	0.76
Co2Rh2-Rh-Co	0.764674788	-1.44908248	1.830899918	-0.007494885	3.189274271	2.15179923	7.88	0.66	1.88	5.76	-1.17	1.39	0.76
Co2Pd2-Pd-Co	0.761799689	-1.449430864	1.712895828	0.139269459	3.059315459	2.107681577	7.88	0.66	1.88	5.76	-1.17	1.39	0.76
Co2Ag2-Ag-Co	0.751616413	-1.188447525	1.596795489	-0.14462326	4.061973375	1.916233223	7.88	0.66	1.88	5.76	-1.17	1.39	0.76
Co2Ta2-Ta-Co	0.790213323	-1.231112461	1.832403312	0.675921685	3.738207101	1.605133786	7.88	0.66	1.88	5.76	-1.17	1.39	0.76
Co2W2-W-Co	0.789220784	-1.168359651	1.691508882	0.392163667	4.06799769	2.187731156	7.88	0.66	1.88	5.76	-1.17	1.39	0.76
Co2Re2-Re-Co	0.78284964	-1.344650623	1.843810948	0.077531547	3.689020657	1.893309804	7.88	0.66	1.88	5.76	-1.17	1.39	0.76
Co2Os2-Os-Co	0.780584041	-1.436306908	1.849305495	-0.147761562	3.774125659	2.098665539	7.88	0.66	1.88	5.76	-1.17	1.39	0.76
Co2Ir2-Ir-Co	0.762820262	-1.465174668	1.811484416	-0.151362559	3.412703682	2.087698297	7.88	0.66	1.88	5.76	-1.17	1.39	0.76
Co2Pt2-Pt-Co	0.7651381	-1.491007279	1.813078592	-0.067334948	3.280099994	2.163149696	7.88	0.66	1.88	5.76	-1.17	1.39	0.76
Ni2Sc2-Sc-Ni	0.880258064	-1.287407891	1.181436468	1.753868968	7.003168363	1.523013413	7.64	1.16	1.91	5.77	-1.29	1.38	0.71
Ni2Ti2-Ti-Ni	0.889785504	-1.69008465	1.410774532	1.543558193	5.881709683	1.642761495	7.64	1.16	1.91	5.77	-1.29	1.38	0.71
Ni2V2-V-Ni	0.876452659	-1.836237738	1.485732711	1.207616393	4.854732341	1.702016326	7.64	1.16	1.91	5.77	-1.29	1.38	0.71
Ni2Cr2-Cr-Ni	0.876319196	-1.705961725	1.461931331	0.954750531	4.697469921	1.731353191	7.64	1.16	1.91	5.77	-1.29	1.38	0.71
Ni2Fe2-Fe-Ni	0.883390135	-1.495352707	1.399127493	0.727734335	5.138904625	1.851479823	7.64	1.16	1.91	5.77	-1.29	1.38	0.71
Ni2Co2-Co-Ni	0.873070362	-1.545154401	1.41848817	0.508923287	4.83673837	1.888950184	7.64	1.16	1.91	5.77	-1.29	1.38	0.71
Ni2Ni2-Ni-Ni	0.875059614	-1.404502336	1.371138722	0.458620241	4.948015368	1.91	7.64	1.16	1.91	5.77	-1.29	1.38	0.71
Ni2Cu2-Cu-Ni	0.887561495	-1.058672353	1.296450205	0.084139835	5.839419843	1.90299449	7.64	1.16	1.91	5.77	-1.29	1.38	0.71
Ni2Y2-Y-Ni	0.772667344	-0.432339645	1.253361093	1.786682247	6.654494007	1.416612304	7.64	1.16	1.91	5.77	-1.29	1.38	0.71
Ni2Zr2-Zr-Ni	0.874708603	-1.351422086	1.242974716	2.063339897	7.931962706	1.391551734	7.64	1.16	1.91	5.77	-1.29	1.38	0.71
Ni2Nb2-Nb-Ni	0.874871564	-1.781786745	1.608536609	1.253999012	5.333301887	1.687306572	7.64	1.16	1.91	5.77	-1.29	1.38	0.71
Ni2Mo2-Mo-Ni	0.871211145	-1.826078013	1.625979928	0.868238767	4.538338702	2.081745507	7.64	1.16	1.91	5.77	-1.29	1.38	0.71
Ni2Ru2-Ru-Ni	0.869926432	-1.486962466	1.412155955	0.108961541	4.453045273	2.098744525	7.64	1.16	1.91	5.77	-1.29	1.38	0.71
Ni2Rh2-Rh-Ni	0.873179335	-1.414573603	1.481565358	-0.008709033	4.68775308	2.162043378	7.64	1.16	1.91	5.77	-1.29	1.38	0.71
Ni2Pd2-Pd-Ni	0.88176646	-1.330571833	1.431332564	-0.041003022	4.744703267	2.108656732	7.64	1.16	1.91	5.77	-1.29	1.38	0.71
Ni2Ag2-Ag-Ni	0.886238311	-0.828650967	1.199397682	-0.47363277	8.622938245	1.924524777	7.64	1.16	1.91	5.77	-1.29	1.38	0.71
Ni2La2-La-Ni	0.099831533	0.953646722	1.124933834	-2.424812679	47.88439437	1.243501089	7.64	1.16	1.91	5.77	-1.29	1.38	0.71
Ni2Ta2-Ta-Ni	0.874580506	-1.92748296	1.691550826	1.194233162	5.214097727	1.612775404	7.64	1.16	1.91	5.77	-1.29	1.38	0.71
Ni2W2-W-Ni	0.876556415	-1.694575223	1.589394877	0.807350683	5.027050685	2.199306669	7.64	1.16	1.91	5.77	-1.29	1.38	0.71
Ni2Re2-Re-Ni	0.887877287	-1.888932099	1.510395515	0.016686048	3.727020525	1.903327502	7.64	1.16	1.91	5.77	-1.29	1.38	0.71
Ni2Os2-Os-Ni	0.875655542	-1.721287896	1.53245472	0.149071845	4.78354432	2.086419765	7.64	1.16	1.91	5.77	-1.29	1.38	0.71
Ni2Ir2-Ir-Ni	0.868748467	-1.529645889	1.520867788	-0.266386508	4.84740441	2.098744525	7.64	1.16	1.91	5.77	-1.29	1.38	0.71
Ni2Pt2-Pt-Ni	0.873266945	-1.269439617	1.43717486	-0.24719794	5.406826532	2.17250966	7.64	1.16	1.91	5.77	-1.29	1.38	0.71
Cu2Sc2-Sc-Cu	0.966811826	-2.675076401	0.964045718	3.517641555	19.31168837	1.520350796	7.73	1.24	1.9	5.3	-2.67	1.41	0.67
Cu2Ti2-Ti-Cu	0.965336842	-3.170045968	1.102248832	3.025335522	15.08344939	1.640176499	7.73	1.24	1.9	5.3	-2.67	1.41	0.67
Cu2V2-V-Cu	0.96185639	-2.923705551	1.110403958	2.41187403	11.54280272	1.706700844	7.73	1.24	1.9	5.3	-2.67	1.41	0.67
Cu2Cr2-Cr-Cu	0.963160991	-2.870960831	1.136540674	2.026041216	9.933439429	1.72862879	7.73	1.24	1.9	5.3	-2.67	1.41	0.67
Cu2Mn2-Mn-Cu	0.961097306	-2.74937	1.144205399	1.692405244	8.977494591	1.647624605	7.73	1.24	1.9	5.3	-2.67	1.41	0.67
Cu2Fe2-Fe-Cu	0.966597072	-2.581333891	1.066822376	1.691324742	10.13217911	1.850724794	7.73	1.24	1.9	5.3	-2.67	1.41	0.67
Cu2Co2-Co-Cu	0.965607297	-2.489831794	1.089293202	1.284291405	8.627671739	1.885977793	7.73	1.24	1.9	5.3	-2.67	1.41	0.67
Cu2Ni2-Ni-Cu	0.969380959	-2.191122788	1.063501237	1.223645128	8.410467421	1.906994486	7.73	1.24	1.9	5.3	-2.67	1.41	0.67
Cu2Cu2-Cu-Cu	0.972218269	-2.382851666	1.04972135	1.120570468	9.924607231	1.9	7.73	1.24	1.9	5.3	-2.67	1.41	0.67
Cu2Y2-Y-Cu	0.964127325	-2.775822206	1.063346354	3.613279377	19.92866244	1.393406916	7.73	1.24	1.9	5.3	-2.67	1.41	0.67
Cu2Zr2-Zr-Cu	0.96190256	-3.129205215	1.197942294	3.053188404	15.16611261	1.480206234	7.73	1.24	1.9	5.3	-2.67	1.41	0.67
Cu2Nb2-Nb-Cu	0.959764669	-3.25531211	1.278654226	2.511283087	11.74113558	1.684651481	7.73	1.24	1.9	5.3	-2.67	1.41	0.67
Cu2Mo2-Mo-Cu	0.962491286	-2.836774573	1.150451408	1.924753342	9.959890243	2.069602948	7.73	1.24	1.9	5.3	-2.67	1.41	0.67
Cu2Ru2-Ru-Cu	0.961724432	-2.471025514	1.199061225	0.863045214	6.566729533	2.105338619	7.73	1.24	1.9	5.3	-2.67	1.41	0.67
Cu2Rh2-Rh-Cu	0.965057054	-2.183568219	1.153170171	0.67135808	6.814133839	2.158641257	7.73	1.24	1.9	5.3	-2.67	1.41	0.67
Cu2Pd2-Pd-Cu	0.970818929	-1.917280273	1.126449518	0.44877613	6.656358577	2.105338619	7.73	1.24	1.9	5.3	-2.67	1.41	0.67
Cu2Ag2-Ag-Cu	0.973934448	-2.163664266	0.99896936	0.348663269	11.88929586	1.921771517	7.73	1.24	1.9	5.3	-2.67	1.41	0.67
Cu2Ta2-Ta-Cu	0.963548171	-2.896314244	1.14659213	2.483497017	13.27727247	1.622975783	7.73	1.24	1.9	5.3	-2.67	1.41	0.67
Cu2W2-W-Cu	0.961176957	-3.011376946	1.248718858	1.855163464	9.97795779	2.195461719	7.73	1.24	1.9	5.3	-2.67	1.41	0.67
Cu2Re2-Re-Cu	0.960488568	-2.820788401	1.306303087	1.161042414	7.522882961	1.9	7.73	1.24	1.9	5.3	-2.67	1.41	0.67
Cu2Os2-Os-Cu	0.961029207	-2.682021359	1.305879092	0.606123277	6.595193888	2.105338619	7.73	1.24	1.9	5.3	-2.67	1.41	0.67
Cu2Ir2-Ir-Cu	0.964019895	-2.281501421	1.231284003	0.223083128	6.815617341	2.105338619	7.73	1.24	1.9	5.3	-2.67	1.41	0.67
Cu2Pt2-Pt-Cu	0.966555374	-2.02254981	1.213012785	0.031170891	6.59462302	2.158641257	7.73	1.24	1.9	5.3	-2.67	1.41	0.67
Cu2Au2-Au-Cu	0.972932197	-2.201201906	1.147355863	-0.191412705	8.479117758	2.328143159	7.73	1.24	1.9	5.3	-2.67	1.41	0.67
Ru2Sc2-Sc-Ru	0.738889704	-0.981635736	1.97973179	1.083623892	3.448206398	1.571100765	7.36	1.05	2.2	5.73	-1.41	1.48	1.05
Ru2Ti2-Ti-Ru	0.750623475	-1.15601123	2.004032575	0.877874744	2.974408244	1.713923008	7.36	1.05	2.2	5.73	-1.41	1.48	1.05
Ru2V2-V-Ru	0.718151607	-1.297770303	2.112888411	0.629662456	2.503587239	1.768912136	7.36	1.05	2.2	5.73	-1.41	1.48	1.05
Ru2Cr2-Cr-Ru	0.719028442	-1.306176739	2.041071908	0.440606607	2.475230124	1.792530745	7.36	1.05	2.2	5.73	-1.41	1.48	1.05
Ru2Mn2-Mn-Ru	0.708093622	-1.322096511	1.992760941	0.415338107	2.66481918	1.721706	7.36	1.05	2.2	5.73	-1.41	1.48	1.05
Ru2Fe2-Fe-Ru	0.724105452	-1.099595412	1.858323122	0.333158295	3.007162126	1.93393809	7.36	1.05	2.2	5.73	-1.41	1.48	1.05
Ru2Co2-Co-Ru	0.718198689	-1.189804897	1.88828357	0.250628691	2.923275525	1.970776154	7.36	1.05	2.2	5.73	-1.41	1.48	1.05
Ru2Ni2-Ni-Ru	0.707334281	-1.202720539	1.850588742	0.282863579	2.969690724	1.992737811	7.36	1.05	2.2	5.73	-1.41	1.48	1.05
Ru2Cu2-Cu-Ru	0.715666116	-0.962092534	1.769766079	0.063175078	3.365275119	1.985428835	7.36	1.05	2.2	5.73	-1.41	1.48	1.05
Ru2Y2-Y-Ru	0.786198549	-0.982104704	1.431376543	1.119614817	3.562648127	1.358052979	7.36	1.05	2.2	5.73	-1.41	1.48	1.05
Ru2Zr2-Zr-Ru	0.722911861	-1.069368371	2.015587559	0.907150067	3.215669316	1.546760073	7.36	1.05	2.2	5.73	-1.41	1.48	1.05
Ru2Nb2-Nb-Ru	0.725774947	-1.142210602	2.156805267	0.703301215	2.813490674	1.760397699	7.36	1.05	2.2	5.73	-1.41	1.48	1.05
Ru2Mo2-Mo-Ru	0.71709296	-1.215557516	2.209935762	0.455860954	2.484368852	2.171923028	7.36	1.05	2.2	5.73	-1.41	1.48	1.05
Ru2Ru2-Ru-Ru	0.705539272	-1.409575583	2.078104787	0.105847951	2.472162631	2.2	7.36	1.05	2.2	5.73	-1.41	1.48	1.05
Ru2Rh2-Rh-Ru	0.704693392	-1.359007983	1.999558782	0.041045943	2.657776795	2.25569926	7.36	1.05	2.2	5.73	-1.41	1.48	1.05
Ru2Pd2-Pd-Ru	0.715230848	-1.225720235	1.894809297	-0.071474401	2.866167332	2.2	7.36	1.05	2.2	5.73	-1.41	1.48	1.05
Ru2Ag2-Ag-Ru	0.72872392	-0.954593809	1.817122532	-0.39801613	4.022574457	2.007321427	7.36	1.05	2.2	5.73	-1.41	1.48	1.05
Ru2La2-La-Ru	0.793128357	-1.19408491	1.589089766	1.072318328	3.338226452	1.42652351	7.36	1.05	2.2	5.73	-1.41	1.48	1.05
Ru2Ta2-Ta-Ru	0.721065897	-1.205832252	2.23276719	0.654121078	2.862951612	1.682637973	7.36	1.05	2.2	5.73	-1.41	1.48	1.05
Ru2W2-W-Ru	0.719760278	-1.315368412	2.358185642	0.416673824	2.547973671	2.310815151	7.36	1.05	2.2	5.73	-1.41	1.48	1.05
Ru2Re2-Re-Ru	0.719976559	-1.440249852	2.399866537	0.214508296	2.511901418	1.985428835	7.36	1.05	2.2	5.73	-1.41	1.48	1.05
Ru2Os2-Os-Ru	0.714833613	-1.5782564	2.33286667	-0.016787781	2.562388096	2.2	7.36	1.05	2.2	5.73	-1.41	1.48	1.05
Ru2Ir2-Ir-Ru	0.706661732	-1.484050915	2.227173359	-0.163104533	2.732740389	2.2	7.36	1.05	2.2	5.73	-1.41	1.48	1.05
Ru2Pt2-Pt-Ru	0.716468093	-1.406586847	2.128489124	-0.250902184	2.888885632	2.25569926	7.36	1.05	2.2	5.73	-1.41	1.48	1.05
Ru2Au2-Au-Ru	0.719409926	-1.143379808	1.987155532	-0.503632664	3.596983681	2.4328224	7.36	1.05	2.2	5.73	-1.41	1.48	1.05
Rh2Sc2-Sc-Rh	0.849303089	-1.66444641	1.749909162	1.304536989	4.115872897	1.588026297	7.46	1.14	2.28	5.91	-1.73	1.49	0.99
Rh2Ti2-Ti-Rh	0.847773244	-1.917928473	1.804439469	1.136844813	3.638404531	1.73238717	7.46	1.14	2.28	5.91	-1.73	1.49	0.99
Rh2V2-V-Rh	0.822127475	-1.970721341	1.90042336	0.834701265	2.886715296	1.786227834	7.46	1.14	2.28	5.91	-1.73	1.49	0.99
Rh2Mn2-Mn-Rh	0.814915566	-1.767620847	1.848803935	0.681861102	3.328859009	1.722033706	7.46	1.14	2.28	5.91	-1.73	1.49	0.99
Rh2Fe2-Fe-Rh	0.811086317	-1.706416662	1.742934884	0.663285569	3.536089186	1.954772483	7.46	1.14	2.28	5.91	-1.73	1.49	0.99
Rh2Co2-Co-Rh	0.817904624	-1.535630871	1.788088712	0.487584197	3.451951096	1.992007405	7.46	1.14	2.28	5.91	-1.73	1.49	0.99
Rh2Ni2-Ni-Rh	0.812993886	-1.509084937	1.741565298	0.520234323	3.565876856	2.014205656	7.46	1.14	2.28	5.91	-1.73	1.49	0.99
Rh2Cu2-Cu-Rh	0.818694517	-1.244007728	1.667296781	0.3257207	3.836488834	2.00681794	7.46	1.14	2.28	5.91	-1.73	1.49	0.99
Rh2Y2-Y-Rh	0.848172644	-1.272940503	1.410105271	1.856728031	5.806739682	1.319188047	7.46	1.14	2.28	5.91	-1.73	1.49	0.99
Rh2Zr2-Zr-Rh	0.832380066	-1.64942683	1.939523404	1.198789374	3.967687681	1.563423382	7.46	1.14	2.28	5.91	-1.73	1.49	0.99
Rh2Mo2-Mo-Rh	0.811387839	-1.767217769	2.07543919	0.726923083	3.038566553	2.195321243	7.46	1.14	2.28	5.91	-1.73	1.49	0.99
Rh2Ru2-Ru-Rh	0.800678774	-1.786273524	1.941149628	0.341128365	2.927804894	2.223700689	7.46	1.14	2.28	5.91	-1.73	1.49	0.99
Rh2Rh2-Rh-Rh	0.796901613	-1.665529463	1.874365983	0.253519709	3.108600823	2.28	7.46	1.14	2.28	5.91	-1.73	1.49	0.99
Rh2Pd2-Pd-Rh	0.80979118	-1.454681111	1.764711655	0.145672088	3.286042072	2.223700689	7.46	1.14	2.28	5.91	-1.73	1.49	0.99
Rh2Ag2-Ag-Rh	0.823692245	-1.183528731	1.695082645	-0.207142914	4.49211536	2.028946383	7.46	1.14	2.28	5.91	-1.73	1.49	0.99
Rh2La2-La-Rh	0.781165464	-0.746931145	1.697327521	0.845166926	7.406570769	1.402512495	7.46	1.14	2.28	5.91	-1.73	1.49	0.99
Rh2Ta2-Ta-Rh	0.81875065	-1.893464668	2.209768149	0.940795175	3.364975657	1.6814539	7.46	1.14	2.28	5.91	-1.73	1.49	0.99
Rh2W2-W-Rh	0.810685299	-1.865243911	2.214148724	0.699713937	3.124497124	2.335709656	7.46	1.14	2.28	5.91	-1.73	1.49	0.99
Rh2Re2-Re-Rh	0.839034153	-2.224794666	2.044590249	0.251142508	2.62081102	2.00681794	7.46	1.14	2.28	5.91	-1.73	1.49	0.99
Rh2Os2-Os-Rh	0.803842964	-2.026301458	2.175913583	0.210092665	2.892004103	2.223700689	7.46	1.14	2.28	5.91	-1.73	1.49	0.99
Rh2Ir2-Ir-Rh	0.79824236	-1.870055432	2.072284905	0.035775871	3.045962121	2.223700689	7.46	1.14	2.28	5.91	-1.73	1.49	0.99
Rh2Pt2-Pt-Rh	0.793099766	-1.572825042	1.962705338	-0.092561243	3.178508512	2.28	7.46	1.14	2.28	5.91	-1.73	1.49	0.99
Rh2Au2-Au-Rh	0.815590977	-1.316386343	1.83831893	-0.352152736	3.929959554	2.459031294	7.46	1.14	2.28	5.91	-1.73	1.49	0.99
Pd2Ti2-Ti-Pd	0.929853848	-2.877889119	1.516474193	1.972461532	7.11927033	1.697331651	8.34	0.56	2.2	5.9	-1.83	1.52	0.94
Pd2V2-V-Pd	0.918736109	-2.788575398	1.577799128	1.560836851	5.539724035	1.768912136	8.34	0.56	2.2	5.9	-1.83	1.52	0.94
Pd2Mn2-Mn-Pd	0.926047878	-2.502847525	1.556617677	1.28769959	5.591381481	1.721706	8.34	0.56	2.2	5.9	-1.83	1.52	0.94
Pd2Ni2-Ni-Pd	0.925442836	-2.032416113	1.429403806	0.893948649	4.999903791	1.992737811	8.34	0.56	2.2	5.9	-1.83	1.52	0.94
Pd2Cu2-Cu-Pd	0.934542066	-1.761797526	1.396855711	0.664150058	4.930626728	1.985428835	8.34	0.56	2.2	5.9	-1.83	1.52	0.94
Pd2Y2-Y-Pd	0.923049291	-2.69026636	1.52792636	2.404847545	9.427153131	1.456058037	8.34	0.56	2.2	5.9	-1.83	1.52	0.94
Pd2Zr2-Zr-Pd	0.917620567	-2.762085905	1.683646866	2.064753108	7.619706121	1.546760073	8.34	0.56	2.2	5.9	-1.83	1.52	0.94
Pd2Nb2-Nb-Pd	0.911479119	-2.87155652	1.738748684	1.657533292	5.796893331	1.745174668	8.34	0.56	2.2	5.9	-1.83	1.52	0.94
Pd2Mo2-Mo-Pd	0.912128712	-2.641311565	1.698869348	1.318923525	4.98016107	2.171923028	8.34	0.56	2.2	5.9	-1.83	1.52	0.94
Pd2Ru2-Ru-Pd	0.909829176	-2.417284044	1.593653383	0.715701648	3.866264026	2.2	8.34	0.56	2.2	5.9	-1.83	1.52	0.94
Pd2Rh2-Rh-Pd	0.910843951	-2.087333822	1.521283076	0.595447901	4.061589579	2.25569926	8.34	0.56	2.2	5.9	-1.83	1.52	0.94
Pd2Pd2-Pd-Pd	0.917350657	-1.694668555	1.425868481	0.387801766	3.974516013	2.2	8.34	0.56	2.2	5.9	-1.83	1.52	0.94
Pd2Ag2-Ag-Pd	0.939139363	-1.711827628	1.425960078	-0.052249942	5.418703565	2.007321427	8.34	0.56	2.2	5.9	-1.83	1.52	0.94
Pd2La2-La-Pd	0.916483121	-2.124309616	1.43857023	2.410988044	9.368766906	1.385913155	8.34	0.56	2.2	5.9	-1.83	1.52	0.94
Pd2W2-W-Pd	0.911760513	-2.771385652	1.82760364	1.262961361	5.016061162	2.310815151	8.34	0.56	2.2	5.9	-1.83	1.52	0.94
Pd2Re2-Re-Pd	0.921114272	-2.950074583	1.748195131	0.711755625	3.589622888	1.985428835	8.34	0.56	2.2	5.9	-1.83	1.52	0.94
Pd2Os2-Os-Pd	0.908893717	-2.764629906	1.806023524	0.558007362	3.752464565	2.2	8.34	0.56	2.2	5.9	-1.83	1.52	0.94
Pd2Ir2-Ir-Pd	0.910793652	-2.348269236	1.703556045	0.306241467	3.792122956	2.2	8.34	0.56	2.2	5.9	-1.83	1.52	0.94
Pd2Pt2-Pt-Pd	0.913216252	-1.905644993	1.594694772	0.103494115	3.84829493	2.25569926	8.34	0.56	2.2	5.9	-1.83	1.52	0.94
Pd2Au2-Au-Pd	0.930851864	-1.725413348	1.552833102	-0.211090733	4.570203239	2.4328224	8.34	0.56	2.2	5.9	-1.83	1.52	0.94
Ag2Sc2-Sc-Ag	0.975380465	-4.667055466	1.22771464	4.174771552	22.55445911	1.510582429	7.58	1.3	1.93	5.01	-4.3	1.59	0.89
Ag2Ti2-Ti-Ag	0.979515012	-4.484843173	1.144795882	3.881838293	20.80473364	1.647903201	7.58	1.3	1.93	5.01	-4.3	1.59	0.89
Ag2Cr2-Cr-Ag	0.978653748	-4.234445697	1.223421803	3.598786159	19.00282599	1.736772182	7.58	1.3	1.93	5.01	-4.3	1.59	0.89
Ag2Mn2-Mn-Ag	0.977522065	-4.284997475	1.226664129	3.301787416	17.92626637	1.655386394	7.58	1.3	1.93	5.01	-4.3	1.59	0.89
Ag2Fe2-Fe-Ag	0.980710745	-4.113148797	1.144450775	3.292922714	18.4664	1.859443367	7.58	1.3	1.93	5.01	-4.3	1.59	0.89
Ag2Co2-Co-Ag	0.979240605	-3.970870897	1.179829244	2.979130818	16.31362007	1.89486244	7.58	1.3	1.93	5.01	-4.3	1.59	0.89
Ag2Ni2-Ni-Ag	0.980021819	-3.751810378	1.157548081	3.044062417	16.54230904	1.91597814	7.58	1.3	1.93	5.01	-4.3	1.59	0.89
Ag2Cu2-Cu-Ag	0.981056594	-4.028006631	1.174237752	2.987302854	17.01198084	1.908950703	7.58	1.3	1.93	5.01	-4.3	1.59	0.89
Ag2Y2-Y-Ag	0.971957646	-4.578389809	1.32360312	4.263262789	23.1594745	1.399971112	7.58	1.3	1.93	5.01	-4.3	1.59	0.89
Ag2Zr2-Zr-Ag	0.970004016	-4.568620041	1.376484565	3.751420542	18.84081873	1.487179333	7.58	1.3	1.93	5.01	-4.3	1.59	0.89
Ag2Nb2-Nb-Ag	0.972693466	-4.401989968	1.332298184	3.396915895	16.56041544	1.6925877	7.58	1.3	1.93	5.01	-4.3	1.59	0.89
Ag2Mo2-Mo-Ag	0.974176773	-4.301186414	1.322724475	2.961017899	13.9202354	2.088261196	7.58	1.3	1.93	5.01	-4.3	1.59	0.89
Ag2Ru2-Ru-Ag	0.980218939	-3.626698072	1.17488984	2.251257254	11.25826327	2.115256651	7.58	1.3	1.93	5.01	-4.3	1.59	0.89
Ag2Rh2-Rh-Ag	0.979812882	-3.451700628	1.166879393	2.268873778	11.39376013	2.168810392	7.58	1.3	1.93	5.01	-4.3	1.59	0.89
Ag2Pd2-Pd-Ag	0.983708925	-3.294868416	1.107483489	2.272955654	11.63253924	2.115256651	7.58	1.3	1.93	5.01	-4.3	1.59	0.89
Ag2Ag2-Ag-Ag	0.983064021	-3.984264977	1.130958431	2.42078135	16.60179666	1.93	7.58	1.3	1.93	5.01	-4.3	1.59	0.89
Ag2La2-La-Ag	0.974620342	-4.544962559	1.283230163	4.295975571	24.91877252	1.32672494	7.58	1.3	1.93	5.01	-4.3	1.59	0.89
Ag2Ta2-Ta-Ag	0.971040827	-4.479330082	1.386045704	3.304273924	16.14622391	1.631473194	7.58	1.3	1.93	5.01	-4.3	1.59	0.89
Ag2W2-W-Ag	0.971597989	-4.383183299	1.427252364	2.764871726	12.81057935	2.221803235	7.58	1.3	1.93	5.01	-4.3	1.59	0.89
Ag2Re2-Re-Ag	0.984163215	-4.137986247	1.244180596	1.701145487	7.507726291	1.908950703	7.58	1.3	1.93	5.01	-4.3	1.59	0.89
Ag2Os2-Os-Ag	0.981948402	-3.683563332	1.214719545	1.884431178	10.89933056	2.115256651	7.58	1.3	1.93	5.01	-4.3	1.59	0.89
Ag2Ir2-Ir-Ag	0.979846295	-3.482902235	1.22744279	1.764396524	9.931819843	2.115256651	7.58	1.3	1.93	5.01	-4.3	1.59	0.89
Ag2Pt2-Pt-Ag	0.981312163	-3.290045114	1.198311144	1.772764205	9.739612381	2.168810392	7.58	1.3	1.93	5.01	-4.3	1.59	0.89
Ag2Au2-Au-Ag	0.982764874	-3.82566135	1.225840195	1.787107837	11.71128166	2.339110801	7.58	1.3	1.93	5.01	-4.3	1.59	0.89
Os2Sc2-Sc-Os	0.712601136	-1.075642386	2.228439542	0.934472585	3.139675926	1.571100765	8.7	1.1	2.2	6.25	-1.5	1.49	1.13
Os2Ti2-Ti-Os	0.727100829	-1.259821422	2.273008821	0.776901686	2.770642297	1.713923008	8.7	1.1	2.2	6.25	-1.5	1.49	1.13
Os2V2-V-Os	0.685893891	-1.313171923	2.436356106	0.526823259	2.289506142	1.768912136	8.7	1.1	2.2	6.25	-1.5	1.49	1.13
Os2Cr2-Cr-Os	0.685307995	-1.365008101	2.381472201	0.38198236	2.238563642	1.792530745	8.7	1.1	2.2	6.25	-1.5	1.49	1.13
Os2Mn2-Mn-Os	0.672767058	-1.463380421	2.348966179	0.359237861	2.33956867	1.721706	8.7	1.1	2.2	6.25	-1.5	1.49	1.13
Os2Fe2-Fe-Os	0.692976783	-1.260015407	2.176308382	0.289919908	2.579738682	1.93393809	8.7	1.1	2.2	6.25	-1.5	1.49	1.13
Os2Co2-Co-Os	0.686909767	-1.348646952	2.220158148	0.222860373	2.52656919	1.970776154	8.7	1.1	2.2	6.25	-1.5	1.49	1.13
Os2Ni2-Ni-Os	0.683410922	-1.403177207	2.172607271	0.252676624	2.610416932	1.992737811	8.7	1.1	2.2	6.25	-1.5	1.49	1.13
Os2Cu2-Cu-Os	0.699737462	-1.116539396	2.086420118	0.028612205	2.860254782	1.985428835	8.7	1.1	2.2	6.25	-1.5	1.49	1.13
Os2Y2-Y-Os	0.670088096	-0.746325191	2.103712054	0.810016211	2.919308453	1.484957807	8.7	1.1	2.2	6.25	-1.5	1.49	1.13
Os2Zr2-Zr-Os	0.693783038	-1.183268339	2.280481185	0.770153255	2.936135016	1.546760073	8.7	1.1	2.2	6.25	-1.5	1.49	1.13
Os2Nb2-Nb-Os	0.690738158	-1.216207421	2.451603998	0.60544571	2.56800285	1.760397699	8.7	1.1	2.2	6.25	-1.5	1.49	1.13
Os2Mo2-Mo-Os	0.68475262	-1.276400101	2.558246492	0.405138905	2.272091025	2.171923028	8.7	1.1	2.2	6.25	-1.5	1.49	1.13
Os2Ru2-Ru-Os	0.672351273	-1.532121249	2.459650533	0.112393607	2.19632958	2.2	8.7	1.1	2.2	6.25	-1.5	1.49	1.13
Os2Rh2-Rh-Os	0.671613867	-1.492530602	2.366340212	0.048445564	2.342238037	2.25569926	8.7	1.1	2.2	6.25	-1.5	1.49	1.13
Os2Pd2-Pd-Os	0.681669528	-1.328931207	2.223514959	-0.084902328	2.528010571	2.2	8.7	1.1	2.2	6.25	-1.5	1.49	1.13
Os2Ag2-Ag-Os	0.704322545	-1.095055075	2.122702168	-0.333518983	3.307511937	2.007321427	8.7	1.1	2.2	6.25	-1.5	1.49	1.13
Os2La2-La-Os	0.609463289	-0.39796583	1.976379205	0.409653965	3.574406172	1.308127827	8.7	1.1	2.2	6.25	-1.5	1.49	1.13
Os2Ta2-Ta-Os	0.690067163	-1.367699991	2.520911988	0.582430592	2.627455772	1.682637973	8.7	1.1	2.2	6.25	-1.5	1.49	1.13
Os2W2-W-Os	0.688655199	-1.392033873	2.698364842	0.383764186	2.347030984	2.310815151	8.7	1.1	2.2	6.25	-1.5	1.49	1.13
Os2Re2-Re-Os	0.686681507	-1.576653318	2.812931025	0.219263995	2.236524861	1.985428835	8.7	1.1	2.2	6.25	-1.5	1.49	1.13
Os2Os2-Os-Os	0.678116176	-1.667389865	2.736830212	0.027647659	2.256209078	2.2	8.7	1.1	2.2	6.25	-1.5	1.49	1.13
Os2Ir2-Ir-Os	0.673592254	-1.634366788	2.62776324	-0.098612313	2.376092405	2.2	8.7	1.1	2.2	6.25	-1.5	1.49	1.13
Os2Pt2-Pt-Os	0.684883665	-1.559819788	2.502195832	-0.167187863	2.47328817	2.25569926	8.7	1.1	2.2	6.25	-1.5	1.49	1.13
Os2Au2-Au-Os	0.696675102	-1.33184533	2.333258401	-0.403510574	2.996501682	2.4328224	8.7	1.1	2.2	6.25	-1.5	1.49	1.13
Ir2Sc2-Sc-Ir	0.84331992	-1.775629121	1.946039606	1.142676994	3.74771365	1.571100765	9.1	1.57	2.2	6.63	-2.11	1.5	1.08
Ir2Ti2-Ti-Ir	0.838987908	-2.06852301	2.019872605	1.008076619	3.351867381	1.713923008	9.1	1.57	2.2	6.63	-2.11	1.5	1.08
Ir2V2-V-Ir	0.804147264	-2.061495972	2.139826304	0.726463775	2.662649991	1.768912136	9.1	1.57	2.2	6.63	-2.11	1.5	1.08
Ir2Mn2-Mn-Ir	0.79363834	-1.896194322	2.114527071	0.598535832	2.943324217	1.705340307	9.1	1.57	2.2	6.63	-2.11	1.5	1.08
Ir2Fe2-Fe-Ir	0.806722014	-1.646195183	2.012174379	0.525083674	3.164198608	1.93393809	9.1	1.57	2.2	6.63	-2.11	1.5	1.08
Ir2Co2-Co-Ir	0.795083871	-1.715350192	2.041004041	0.431538685	3.022878397	1.970776154	9.1	1.57	2.2	6.63	-2.11	1.5	1.08
Ir2Ni2-Ni-Ir	0.789874641	-1.708048174	1.999155002	0.461854714	3.103618961	1.992737811	9.1	1.57	2.2	6.63	-2.11	1.5	1.08
Ir2Cu2-Cu-Ir	0.799781741	-1.495098089	1.925257113	0.262605185	3.260808096	1.985428835	9.1	1.57	2.2	6.63	-2.11	1.5	1.08
Ir2Y2-Y-Ir	0.83463877	-1.822640109	2.081328932	1.241116728	3.899530877	1.432831608	9.1	1.57	2.2	6.63	-2.11	1.5	1.08
Ir2Zr2-Zr-Ir	0.820194026	-1.727788487	2.165843906	1.047867638	3.566027106	1.546760073	9.1	1.57	2.2	6.63	-2.11	1.5	1.08
Ir2Nb2-Nb-Ir	0.805159732	-1.858397478	2.337210353	0.829075484	2.959602487	1.745174668	9.1	1.57	2.2	6.63	-2.11	1.5	1.08
Ir2Mo2-Mo-Ir	0.792411646	-1.899929068	2.36255858	0.65266651	2.727490766	2.171923028	9.1	1.57	2.2	6.63	-2.11	1.5	1.08
Ir2Ru2-Ru-Ir	0.778552948	-1.9525659	2.237906078	0.323640107	2.58166635	2.2	9.1	1.57	2.2	6.63	-2.11	1.5	1.08
Ir2Rh2-Rh-Ir	0.781256745	-1.899978193	2.166515456	0.253927634	2.71579752	2.25569926	9.1	1.57	2.2	6.63	-2.11	1.5	1.08
Ir2Pd2-Pd-Ir	0.780567203	-1.620755578	2.037061728	0.128466603	2.847544138	2.2	9.1	1.57	2.2	6.63	-2.11	1.5	1.08
Ir2Ag2-Ag-Ir	0.794921789	-1.380623136	1.954043886	-0.166777666	3.628381929	2.007321427	9.1	1.57	2.2	6.63	-2.11	1.5	1.08
Ir2La2-La-Ir	0.842354047	-1.842091193	1.891418856	1.143851436	3.969938164	1.385913155	9.1	1.57	2.2	6.63	-2.11	1.5	1.08
Ir2Ta2-Ta-Ir	0.805012652	-1.965823727	2.45983291	0.817573701	2.996370661	1.665153882	9.1	1.57	2.2	6.63	-2.11	1.5	1.08
Ir2W2-W-Ir	0.794327123	-2.015968256	2.517498488	0.634789615	2.78970591	2.310815151	9.1	1.57	2.2	6.63	-2.11	1.5	1.08
Ir2Re2-Re-Ir	0.838717156	-2.479674994	2.259253266	0.253679501	2.45507895	1.985428835	9.1	1.57	2.2	6.63	-2.11	1.5	1.08
Ir2Os2-Os-Ir	0.784041771	-2.190189939	2.496729702	0.225127454	2.541628909	2.2	9.1	1.57	2.2	6.63	-2.11	1.5	1.08
Ir2Ir2-Ir-Ir	0.779553723	-2.11479	2.399045598	0.082075318	2.622193406	2.2	9.1	1.57	2.2	6.63	-2.11	1.5	1.08
Ir2Pt2-Pt-Ir	0.783502233	-1.871457386	2.284357367	-0.014913059	2.711968645	2.25569926	9.1	1.57	2.2	6.63	-2.11	1.5	1.08
Ir2Au2-Au-Ir	0.789085242	-1.546147971	2.124784341	-0.267420598	3.204311441	2.4328224	9.1	1.57	2.2	6.63	-2.11	1.5	1.08
Pt2Sc2-Sc-Pt	0.888641481	-2.817738786	1.892176417	1.850069138	6.284364233	1.588026297	9	2.13	2.28	6.74	-2.25	1.53	1.04
Pt2Ti2-Ti-Pt	0.892259727	-2.893624652	1.86504403	1.636023808	5.552351297	1.713946655	9	2.13	2.28	6.74	-2.25	1.53	1.04
Pt2V2-V-Pt	0.871346152	-2.810465629	1.931041144	1.269380924	4.320250727	1.786227834	9	2.13	2.28	6.74	-2.25	1.53	1.04
Pt2Mn2-Mn-Pt	0.876071601	-2.646242278	1.898216991	1.099770601	4.393000125	1.740254009	9	2.13	2.28	6.74	-2.25	1.53	1.04
Pt2Fe2-Fe-Pt	0.88693552	-2.2675456	1.74217064	0.919194933	4.397280798	1.954772483	9	2.13	2.28	6.74	-2.25	1.53	1.04
Pt2Co2-Co-Pt	0.882515288	-2.289677301	1.756741621	0.795016377	4.139566616	1.992007405	9	2.13	2.28	6.74	-2.25	1.53	1.04
Pt2Ni2-Ni-Pt	0.882344506	-2.129694085	1.717676751	0.805018118	4.145965048	2.014205656	9	2.13	2.28	6.74	-2.25	1.53	1.04
Pt2Cu2-Cu-Pt	0.896305265	-1.872788004	1.692856408	0.641886317	4.176929612	2.00681794	9	2.13	2.28	6.74	-2.25	1.53	1.04
Pt2Y2-Y-Pt	0.87779997	-2.584212123	1.834186164	1.863391595	6.535977039	1.471744209	9	2.13	2.28	6.74	-2.25	1.53	1.04
Pt2Zr2-Zr-Pt	0.873161397	-2.676011487	2.006412991	1.641868292	5.541777214	1.563423382	9	2.13	2.28	6.74	-2.25	1.53	1.04
Pt2Nb2-Nb-Pt	0.869023636	-2.834668008	2.089171674	1.342059875	4.434844914	1.762258001	9	2.13	2.28	6.74	-2.25	1.53	1.04
Pt2Mo2-Mo-Pt	0.868762814	-2.670628894	2.048962089	1.091399704	3.905851538	2.195321243	9	2.13	2.28	6.74	-2.25	1.53	1.04
Pt2Ru2-Ru-Pt	0.865112357	-2.511964632	1.908173897	0.675370498	3.393161716	2.223700689	9	2.13	2.28	6.74	-2.25	1.53	1.04
Pt2Rh2-Rh-Pt	0.87075123	-2.302769363	1.849342609	0.589189083	3.494014202	2.28	9	2.13	2.28	6.74	-2.25	1.53	1.04
Pt2Pd2-Pd-Pt	0.878674364	-1.891726893	1.721555107	0.42580068	3.468983666	2.223700689	9	2.13	2.28	6.74	-2.25	1.53	1.04
Pt2Ag2-Ag-Pt	0.902602725	-1.772778891	1.679798717	0.076619417	4.330017279	2.028946383	9	2.13	2.28	6.74	-2.25	1.53	1.04
Pt2La2-La-Pt	0.866224117	-2.083367732	1.752327885	1.856169544	6.515251683	1.402512495	9	2.13	2.28	6.74	-2.25	1.53	1.04
Pt2Ta2-Ta-Pt	0.866108465	-3.006956452	2.208178322	1.314152072	4.431701214	1.6814539	9	2.13	2.28	6.74	-2.25	1.53	1.04
Pt2W2-W-Pt	0.867905524	-2.798709604	2.190890266	1.057391325	3.931960256	2.335709656	9	2.13	2.28	6.74	-2.25	1.53	1.04
Pt2Re2-Re-Pt	0.870564082	-2.99359952	2.189405194	0.81971637	3.527929667	2.00681794	9	2.13	2.28	6.74	-2.25	1.53	1.04
Pt2Os2-Os-Pt	0.868205027	-2.863894516	2.133304674	0.546525771	3.23140862	2.223700689	9	2.13	2.28	6.74	-2.25	1.53	1.04
Pt2Ir2-Ir-Pt	0.870943082	-2.565371086	2.040670979	0.360321291	3.19386279	2.223700689	9	2.13	2.28	6.74	-2.25	1.53	1.04
Pt2Pt2-Pt-Pt	0.877843237	-2.112425832	1.898173864	0.207831109	3.249565855	2.28	9	2.13	2.28	6.74	-2.25	1.53	1.04
Pt2Au2-Au-Pt	0.893025358	-1.875158219	1.834077432	-0.016736748	3.803200257	2.459031294	9	2.13	2.28	6.74	-2.25	1.53	1.04
Au2Sc2-Sc-Au	0.962197224	-4.366582456	1.484070721	3.111165113	13.83874334	1.640315357	9.23	2.31	2.54	6.01	-3.56	1.59	1.01
Au2Ti2-Ti-Au	0.965108579	-4.381975318	1.424578659	2.870171336	12.55414301	1.789429611	9.23	2.31	2.54	6.01	-3.56	1.59	1.01
Au2Cr2-Cr-Au	0.961580522	-3.950231548	1.497084145	2.235451466	9.181097355	1.885930902	9.23	2.31	2.54	6.01	-3.56	1.59	1.01
Au2Mn2-Mn-Au	0.962842043	-4.013605448	1.512927121	2.301586111	10.20221221	1.797555481	9.23	2.31	2.54	6.01	-3.56	1.59	1.01
Au2Fe2-Fe-Au	0.968529773	-3.776625817	1.404127381	2.207373835	10.24549768	2.019137421	9.23	2.31	2.54	6.01	-3.56	1.59	1.01
Au2Co2-Co-Au	0.966105316	-3.665464404	1.439358953	1.990662176	9.196173721	2.057598381	9.23	2.31	2.54	6.01	-3.56	1.59	1.01
Au2Ni2-Ni-Au	0.967000781	-3.38902573	1.411103371	2.008468904	9.151157944	2.080527555	9.23	2.31	2.54	6.01	-3.56	1.59	1.01
Au2Cu2-Cu-Au	0.969838507	-3.577753672	1.407614721	1.936556784	9.437731532	2.072896583	9.23	2.31	2.54	6.01	-3.56	1.59	1.01
Au2Y2-Y-Au	0.95766972	-4.207345816	1.559948477	3.216134839	14.60051603	1.520204439	9.23	2.31	2.54	6.01	-3.56	1.59	1.01
Au2Zr2-Zr-Au	0.952132389	-4.331180714	1.677419075	2.82386017	11.71754266	1.614902339	9.23	2.31	2.54	6.01	-3.56	1.59	1.01
Au2Nb2-Nb-Au	0.955249322	-4.097714661	1.648535972	2.442502959	9.768638918	1.837951736	9.23	2.31	2.54	6.01	-3.56	1.59	1.01
Au2Mo2-Mo-Au	0.954733284	-4.054362389	1.648180232	2.164429779	8.420672702	2.267606748	9.23	2.31	2.54	6.01	-3.56	1.59	1.01
Au2Ru2-Ru-Au	0.958840125	-3.492808847	1.510934651	1.569672104	6.382229779	2.296920647	9.23	2.31	2.54	6.01	-3.56	1.59	1.01
Au2Rh2-Rh-Au	0.962979423	-3.146606714	1.44166086	1.502909167	6.575309532	2.355073729	9.23	2.31	2.54	6.01	-3.56	1.59	1.01
Au2Pd2-Pd-Au	0.97228792	-2.884092455	1.361460525	1.4081714	6.477227113	2.296920647	9.23	2.31	2.54	6.01	-3.56	1.59	1.01
Au2Ag2-Ag-Au	0.973027605	-3.487706105	1.362810199	1.397049257	8.996082905	2.09575365	9.23	2.31	2.54	6.01	-3.56	1.59	1.01
Au2La2-La-Au	0.961266058	-4.064003841	1.479981941	3.218105732	15.71302476	1.453917271	9.23	2.31	2.54	6.01	-3.56	1.59	1.01
Au2Ta2-Ta-Au	0.952314424	-4.195112361	1.757209322	2.3452303	9.363333375	1.756766318	9.23	2.31	2.54	6.01	-3.56	1.59	1.01
Au2W2-W-Au	0.952668183	-4.197112865	1.785580029	2.016276784	7.816080981	2.412617741	9.23	2.31	2.54	6.01	-3.56	1.59	1.01
Au2Re2-Re-Au	0.96017316	-4.230549168	1.644210614	1.460465503	5.600101071	2.072896583	9.23	2.31	2.54	6.01	-3.56	1.59	1.01
Au2Os2-Os-Au	0.966287037	-3.368795933	1.550304087	1.098416298	5.859639399	2.296920647	9.23	2.31	2.54	6.01	-3.56	1.59	1.01
Au2Ir2-Ir-Au	0.964444791	-3.178018987	1.530394582	1.079464351	5.715843955	2.296920647	9.23	2.31	2.54	6.01	-3.56	1.59	1.01
Au2Pt2-Pt-Au	0.968176458	-2.919317494	1.463387848	1.073305829	5.823468678	2.355073729	9.23	2.31	2.54	6.01	-3.56	1.59	1.01
Au2Au2-Au-Au	0.97193765	-3.333249275	1.453802021	1.014287171	6.871726569	2.54	9.23	2.31	2.54	6.01	-3.56	1.59	1.01
CoSc3-Sc-Co	0.79633974	-0.702395905	1.278837465	1.471901815	4.102216787	1.39719542	7.88	0.66	1.88	5.76	-1.17	1.39	0.76
CoTi3-Ti-Co	0.824797197	-1.319625555	1.443036546	1.186852778	4.002656476	1.571029839	7.88	0.66	1.88	5.76	-1.17	1.39	0.76
CoV3-V-Co	0.804116464	-1.300479428	1.543174462	0.828139934	3.230722166	1.653425491	7.88	0.66	1.88	5.76	-1.17	1.39	0.76
CoCr3-Cr-Co	0.797868767	-1.317797177	1.586797534	0.511818769	2.931372462	1.675968154	7.88	0.66	1.88	5.76	-1.17	1.39	0.76
CoMn3-Mn-Co	0.792030541	-1.281926595	1.665789176	0.46731599	3.416892784	1.573185242	7.88	0.66	1.88	5.76	-1.17	1.39	0.76
CoFe3-Fe-Co	0.790067031	-1.134357763	1.682894341	0.439082552	3.466300042	1.834939568	7.88	0.66	1.88	5.76	-1.17	1.39	0.76
CoCo3-Co-Co	0.779876963	-1.389732784	1.740626424	0.31445849	3.253675282	1.88	7.88	0.66	1.88	5.76	-1.17	1.39	0.76
CoNi3-Ni-Co	0.770940771	-1.479803678	1.706578917	0.335073642	3.242442284	1.907675408	7.88	0.66	1.88	5.76	-1.17	1.39	0.76
CoCu3-Cu-Co	0.792529485	-1.062889705	1.567912731	-0.074800999	4.146469932	1.897990463	7.88	0.66	1.88	5.76	-1.17	1.39	0.76
CoY3-Y-Co	0.62211695	0.165626493	1.107906932	1.53412529	5.554189854	1.287758968	7.88	0.66	1.88	5.76	-1.17	1.39	0.76
CoZr3-Zr-Co	0.793361692	-0.865604265	1.416077783	1.222902961	4.273216684	1.372511025	7.88	0.66	1.88	5.76	-1.17	1.39	0.76
CoNb3-Nb-Co	0.803903118	-1.173165679	1.754411311	0.859218867	3.90703051	1.626012086	7.88	0.66	1.88	5.76	-1.17	1.39	0.76
CoRu3-Ru-Co	0.780861107	-1.408652597	1.894915356	-0.123767189	3.303793835	2.165689534	7.88	0.66	1.88	5.76	-1.17	1.39	0.76
CoRh3-Rh-Co	0.767466358	-1.426060966	1.780183064	0.068877851	3.161653639	2.246417442	7.88	0.66	1.88	5.76	-1.17	1.39	0.76
CoAg3-Ag-Co	0.780066039	-1.068001245	1.459269643	-0.222126038	5.233557658	1.926107079	7.88	0.66	1.88	5.76	-1.17	1.39	0.76
CoTa3-Ta-Co	0.791059838	-1.261157301	1.715730816	0.950638338	3.723463562	1.526282212	7.88	0.66	1.88	5.76	-1.17	1.39	0.76
CoW3-W-Co	0.781494544	-1.217902629	1.799350097	0.525209611	3.303025004	2.315701037	7.88	0.66	1.88	5.76	-1.17	1.39	0.76
CoRe3-Re-Co	0.84277675	-1.848264402	1.927010251	-0.258767403	2.902627635	1.897990463	7.88	0.66	1.88	5.76	-1.17	1.39	0.76
CoOs3-Os-Co	0.791766828	-1.569658585	2.18493144	-0.196143012	3.44629894	2.165689534	7.88	0.66	1.88	5.76	-1.17	1.39	0.76
CoPt3-Pt-Co	0.760874728	-1.69778844	1.802809997	-0.007607298	2.630216186	2.236439464	7.88	0.66	1.88	5.76	-1.17	1.39	0.76
NiSc3-Sc-Ni	0.868911894	-1.573238221	1.306871386	2.284593985	7.941568821	1.412300723	7.64	1.16	1.91	5.77	-1.29	1.38	0.71
NiTi3-Ti-Ni	0.879882105	-1.863186419	1.461615378	1.980576214	7.086127918	1.573518979	7.64	1.16	1.91	5.77	-1.29	1.38	0.71
NiV3-V-Ni	0.86726202	-1.828086406	1.519085092	1.497665955	5.374459962	1.656045179	7.64	1.16	1.91	5.77	-1.29	1.38	0.71
NiCr3-Cr-Ni	0.865984948	-1.713765607	1.492876732	1.084076196	4.540267097	1.683451527	7.64	1.16	1.91	5.77	-1.29	1.38	0.71
NiFe3-Fe-Ni	0.865776978	-1.595278519	1.368653396	0.710279026	5.047516814	1.837846847	7.64	1.16	1.91	5.77	-1.29	1.38	0.71
NiCo3-Co-Ni	0.869210161	-1.602911054	1.430260761	0.541890097	4.815840375	1.882978673	7.64	1.16	1.91	5.77	-1.29	1.38	0.71
NiNi3-Ni-Ni	0.868168195	-1.405940899	1.37273617	0.456480098	4.941926012	1.91	7.64	1.16	1.91	5.77	-1.29	1.38	0.71
NiCu3-Cu-Ni	0.877250312	-0.979572503	1.296086185	-0.069400559	6.075616697	1.900997639	7.64	1.16	1.91	5.77	-1.29	1.38	0.71
NiY3-Y-Ni	0.465357181	0.291296313	0.983005576	2.235550037	8.378599605	1.29030988	7.64	1.16	1.91	5.77	-1.29	1.38	0.71
NiZr3-Zr-Ni	0.862856418	-1.530989131	1.420432064	1.997487105	7.205771363	1.374487798	7.64	1.16	1.91	5.77	-1.29	1.38	0.71
NiNb3-Nb-Ni	0.866343587	-1.83006155	1.662696832	1.401705868	5.411062835	1.62858834	7.64	1.16	1.91	5.77	-1.29	1.38	0.71
NiMo3-Mo-Ni	0.866141855	-2.007978262	1.733456661	0.975736812	4.501804353	2.133593663	7.64	1.16	1.91	5.77	-1.29	1.38	0.71
NiRu3-Ru-Ni	0.863408119	-1.640167561	1.613713139	0.086710082	4.086700102	2.169120853	7.64	1.16	1.91	5.77	-1.29	1.38	0.71
NiRh3-Rh-Ni	0.873464679	-1.548378323	1.54998675	-0.080135883	4.402038535	2.23998288	7.64	1.16	1.91	5.77	-1.29	1.38	0.71
NiPd3-Pd-Ni	0.865097681	-1.280318381	1.476029598	-0.216168298	4.559737213	2.169120853	7.64	1.16	1.91	5.77	-1.29	1.38	0.71
NiAg3-Ag-Ni	0.884674014	-0.687058949	1.097600359	-0.702519925	11.90704447	1.928454131	7.64	1.16	1.91	5.77	-1.29	1.38	0.71
NiTa3-Ta-Ni	0.865262036	-2.018606145	1.725408057	1.257000612	5.090420456	1.536687186	7.64	1.16	1.91	5.77	-1.29	1.38	0.71
NiW3-W-Ni	0.863771814	-2.172597596	1.879973469	0.951450101	4.670180616	2.31059665	7.64	1.16	1.91	5.77	-1.29	1.38	0.71
NiRe3-Re-Ni	0.872269481	-1.619758771	1.789473963	0.411405485	4.574560902	1.900997639	7.64	1.16	1.91	5.77	-1.29	1.38	0.71
NiOs3-Os-Ni	0.867005669	-1.435125413	1.597360769	-0.136725545	4.949071911	2.169120853	7.64	1.16	1.91	5.77	-1.29	1.38	0.71
NiIr3-Ir-Ni	0.870128582	-1.584179251	1.694956621	-0.395270344	4.746809732	2.169120853	7.64	1.16	1.91	5.77	-1.29	1.38	0.71
NiPt3-Pt-Ni	0.862334735	-1.463539252	1.466098588	-0.196490936	3.989837791	2.23998288	7.64	1.16	1.91	5.77	-1.29	1.38	0.71
CuSc3-Sc-Cu	0.961635569	-3.298089058	1.100699902	4.321454355	23.14893221	1.406243013	7.73	1.24	1.9	5.3	-2.67	1.41	0.67
CuTi3-Ti-Cu	0.964021394	-3.270216338	1.130711027	3.612180775	17.74008348	1.572693199	7.73	1.24	1.9	5.3	-2.67	1.41	0.67
CuV3-V-Cu	0.958253375	-3.135170447	1.187016866	2.835420742	12.33701925	1.65517609	7.73	1.24	1.9	5.3	-2.67	1.41	0.67
CuCr3-Cr-Cu	0.959313912	-2.89522083	1.143992679	2.272600712	10.00211335	1.682568055	7.73	1.24	1.9	5.3	-2.67	1.41	0.67
CuMn3-Mn-Cu	0.955652363	-2.937233612	1.156843437	2.035926652	9.657682864	1.581881287	7.73	1.24	1.9	5.3	-2.67	1.41	0.67
CuFe3-Fe-Cu	0.964450308	-2.640510109	1.084776571	1.912905675	10.34446554	1.836882349	7.73	1.24	1.9	5.3	-2.67	1.41	0.67
CuCo3-Co-Cu	0.963210314	-2.588392844	1.10182805	1.428875627	8.692025163	1.88199049	7.73	1.24	1.9	5.3	-2.67	1.41	0.67
CuNi3-Ni-Cu	0.967845429	-2.14712893	1.056862527	1.236710875	8.381508082	1.908997636	7.73	1.24	1.9	5.3	-2.67	1.41	0.67
CuCu3-Cu-Cu	0.972218337	-2.382840459	1.049712464	1.120615745	9.924866679	1.9	7.73	1.24	1.9	5.3	-2.67	1.41	0.67
CuY3-Y-Cu	0.962935501	-2.246667623	0.83756113	4.655304603	27.72878052	1.27526138	7.73	1.24	1.9	5.3	-2.67	1.41	0.67
CuZr3-Zr-Cu	0.958774858	-3.229716777	1.196138621	3.436756096	16.52112751	1.378293909	7.73	1.24	1.9	5.3	-2.67	1.41	0.67
CuNb3-Nb-Cu	0.958234794	-3.448546069	1.343741442	2.784694154	12.44911083	1.62773366	7.73	1.24	1.9	5.3	-2.67	1.41	0.67
CuMo3-Mo-Cu	0.96245029	-2.462996904	1.108959304	2.030388536	10.62929065	2.132473958	7.73	1.24	1.9	5.3	-2.67	1.41	0.67
CuRu3-Ru-Cu	0.959851066	-2.560973153	1.226623078	0.777845239	6.041166366	2.167982503	7.73	1.24	1.9	5.3	-2.67	1.41	0.67
CuRh3-Rh-Cu	0.960647951	-2.213508503	1.20461487	0.574224788	6.166822924	2.238807342	7.73	1.24	1.9	5.3	-2.67	1.41	0.67
CuPd3-Pd-Cu	0.969967969	-1.87220375	1.16343687	0.264389852	6.016213468	2.167982503	7.73	1.24	1.9	5.3	-2.67	1.41	0.67
CuAg3-Ag-Cu	0.974883608	-2.057545084	0.95685996	0.179736559	13.54381751	1.927675585	7.73	1.24	1.9	5.3	-2.67	1.41	0.67
CuLa3-La-Cu	0.919176633	-0.577363431	1.00912964	-3.417501668	77.61182012	1.168869752	7.73	1.24	1.9	5.3	-2.67	1.41	0.67
CuTa3-Ta-Cu	0.956224123	-3.592800851	1.41477447	2.621544637	11.84067444	1.535880736	7.73	1.24	1.9	5.3	-2.67	1.41	0.67
CuW3-W-Cu	0.962363289	-2.500102398	1.171171427	1.967380081	11.14942398	2.288025196	7.73	1.24	1.9	5.3	-2.67	1.41	0.67
CuRe3-Re-Cu	0.957054032	-3.120982091	1.441894459	1.315128302	7.532323528	1.9	7.73	1.24	1.9	5.3	-2.67	1.41	0.67
CuOs3-Os-Cu	0.959537071	-2.834717055	1.350450737	0.52175411	6.321469836	2.167982503	7.73	1.24	1.9	5.3	-2.67	1.41	0.67
CuIr3-Ir-Cu	0.961958267	-2.414835393	1.313447725	0.087869881	6.108040626	2.167982503	7.73	1.24	1.9	5.3	-2.67	1.41	0.67
CuPt3-Pt-Cu	0.964836914	-2.046302643	1.26805517	-0.189761664	6.105832268	2.238807342	7.73	1.24	1.9	5.3	-2.67	1.41	0.67
CuAu3-Au-Cu	0.97626258	-1.839214975	1.011903417	-0.531135183	11.08691028	2.483906513	7.73	1.24	1.9	5.3	-2.67	1.41	0.67
RuSc3-Sc-Ru	0.75355552	-1.021330158	1.948362985	1.399177962	3.946752969	1.427010884	7.36	1.05	2.2	5.73	-1.41	1.48	1.05
RuTi3-Ti-Ru	0.76236286	-1.377231796	2.037016207	1.179197985	3.311067623	1.595919263	7.36	1.05	2.2	5.73	-1.41	1.48	1.05
RuV3-V-Ru	0.727644912	-1.167674275	1.969672036	0.799773835	2.772864759	1.679620289	7.36	1.05	2.2	5.73	-1.41	1.48	1.05
RuFe3-Fe-Ru	0.730126285	-0.926452192	1.823652561	0.349176185	3.149643881	1.864010047	7.36	1.05	2.2	5.73	-1.41	1.48	1.05
RuCo3-Co-Ru	0.723444794	-1.03681095	1.850377249	0.229834719	3.04596836	1.90978436	7.36	1.05	2.2	5.73	-1.41	1.48	1.05
RuNi3-Ni-Ru	0.715578628	-1.212249582	1.818913289	0.343446071	3.097469491	1.937190357	7.36	1.05	2.2	5.73	-1.41	1.48	1.05
RuCu3-Cu-Ru	0.745130735	-0.869484936	1.704972979	-0.004231948	3.769543369	1.928059841	7.36	1.05	2.2	5.73	-1.41	1.48	1.05
RuY3-Y-Ru	0.734643858	-1.023404258	1.826055397	1.351596069	4.021389176	1.29409487	7.36	1.05	2.2	5.73	-1.41	1.48	1.05
RuZr3-Zr-Ru	0.730401057	-1.191341462	1.971708439	1.05198728	3.320160286	1.398649019	7.36	1.05	2.2	5.73	-1.41	1.48	1.05
RuNb3-Nb-Ru	0.723263972	-1.24259352	2.126279611	0.856296226	3.008823634	1.65177258	7.36	1.05	2.2	5.73	-1.41	1.48	1.05
RuMo3-Mo-Ru	0.717026674	-1.241157425	2.227808284	0.554178551	2.543045139	2.163967052	7.36	1.05	2.2	5.73	-1.41	1.48	1.05
RuRu3-Ru-Ru	0.705135816	-1.410218913	2.07862495	0.105186699	2.470974867	2.2	7.36	1.05	2.2	5.73	-1.41	1.48	1.05
RuRh3-Rh-Ru	0.707269369	-1.362104176	1.989806683	0.024856951	2.689901067	2.271870804	7.36	1.05	2.2	5.73	-1.41	1.48	1.05
RuPd3-Pd-Ru	0.708544427	-1.223779705	1.900107298	-0.08507029	2.817479432	2.2	7.36	1.05	2.2	5.73	-1.41	1.48	1.05
RuAg3-Ag-Ru	0.740897834	-0.796705316	1.823391395	-0.728964433	4.723304893	1.95543708	7.36	1.05	2.2	5.73	-1.41	1.48	1.05
RuLa3-La-Ru	0.433736662	0.494858959	1.757846611	-1.797529644	24.96357381	1.234708253	7.36	1.05	2.2	5.73	-1.41	1.48	1.05
RuTa3-Ta-Ru	0.723568016	-1.389282908	2.186623938	0.757399039	2.980914627	1.558563141	7.36	1.05	2.2	5.73	-1.41	1.48	1.05
RuW3-W-Ru	0.721509895	-1.366018982	2.392869892	0.539219138	2.730960721	2.343489817	7.36	1.05	2.2	5.73	-1.41	1.48	1.05
RuRe3-Re-Ru	0.722262256	-1.43111486	2.45499139	0.268741871	2.546121203	1.928059841	7.36	1.05	2.2	5.73	-1.41	1.48	1.05
RuOs3-Os-Ru	0.725420319	-1.594815626	2.385442009	-0.029415408	2.57110962	2.2	7.36	1.05	2.2	5.73	-1.41	1.48	1.05
RuIr3-Ir-Ru	0.721151116	-1.532380973	2.270518589	-0.194612867	2.746833673	2.2	7.36	1.05	2.2	5.73	-1.41	1.48	1.05
RuPt3-Pt-Ru	0.716621124	-1.363635894	2.165807395	-0.317140595	2.878031813	2.271870804	7.36	1.05	2.2	5.73	-1.41	1.48	1.05
RuAu3-Au-Ru	0.738110305	-1.025837443	2.012882973	-0.740181219	3.940633718	2.503759517	7.36	1.05	2.2	5.73	-1.41	1.48	1.05
RhSc3-Sc-Rh	0.82076981	-1.714302461	1.864652293	1.806769292	5.345714214	1.432117007	7.46	1.14	2.28	5.91	-1.73	1.49	0.99
RhTi3-Ti-Rh	0.829405788	-1.880983821	1.83950564	1.549870844	4.642710852	1.601629773	7.46	1.14	2.28	5.91	-1.73	1.49	0.99
RhV3-V-Rh	0.800453012	-1.644718899	1.834829586	1.12892879	3.630951182	1.685630297	7.46	1.14	2.28	5.91	-1.73	1.49	0.99
RhCr3-Cr-Rh	0.806503316	-1.68294487	1.822139333	0.834117085	3.310090316	1.713526258	7.46	1.14	2.28	5.91	-1.73	1.49	0.99
RhMn3-Mn-Rh	0.789398692	-1.694112595	1.784105607	0.819552017	3.610326185	1.610986915	7.46	1.14	2.28	5.91	-1.73	1.49	0.99
RhFe3-Fe-Rh	0.813877398	-1.405730237	1.689899119	0.714272384	3.932861429	1.870679838	7.46	1.14	2.28	5.91	-1.73	1.49	0.99
RhCo3-Co-Rh	0.80462042	-1.489605231	1.72177552	0.545918701	3.709109823	1.91661794	7.46	1.14	2.28	5.91	-1.73	1.49	0.99
RhNi3-Ni-Rh	0.800414397	-1.45381968	1.68323633	0.589736654	3.806701719	1.944122002	7.46	1.14	2.28	5.91	-1.73	1.49	0.99
RhCu3-Cu-Rh	0.826362275	-1.116542388	1.599864891	0.274311276	4.221174552	1.934958815	7.46	1.14	2.28	5.91	-1.73	1.49	0.99
RhY3-Y-Rh	0.809077767	-1.843526455	1.801823817	1.769996267	5.401321921	1.298725394	7.46	1.14	2.28	5.91	-1.73	1.49	0.99
RhZr3-Zr-Rh	0.803852449	-1.942187287	1.910106724	1.463912307	4.467085514	1.403653657	7.46	1.14	2.28	5.91	-1.73	1.49	0.99
RhNb3-Nb-Rh	0.798478524	-1.873527601	2.087711445	1.221459054	3.86536288	1.657682944	7.46	1.14	2.28	5.91	-1.73	1.49	0.99
RhMo3-Mo-Rh	0.794283856	-1.868633324	2.141609724	0.867293887	3.112581993	2.171710148	7.46	1.14	2.28	5.91	-1.73	1.49	0.99
RhRu3-Ru-Rh	0.787198376	-1.771401927	1.955188039	0.347355376	2.867891251	2.207872028	7.46	1.14	2.28	5.91	-1.73	1.49	0.99
RhRh3-Rh-Rh	0.793958902	-1.719701625	1.879680293	0.268040709	3.116558383	2.28	7.46	1.14	2.28	5.91	-1.73	1.49	0.99
RhPd3-Pd-Rh	0.790525128	-1.348199485	1.739834493	0.07417072	3.309872254	2.207872028	7.46	1.14	2.28	5.91	-1.73	1.49	0.99
RhAg3-Ag-Rh	0.831304428	-1.023557246	1.691472851	-0.518435992	5.186869733	1.962434014	7.46	1.14	2.28	5.91	-1.73	1.49	0.99
RhLa3-La-Rh	0.73772867	-0.237716921	1.559378738	0.527910424	14.12246947	1.272626955	7.46	1.14	2.28	5.91	-1.73	1.49	0.99
RhTa3-Ta-Rh	0.795788223	-2.019952	2.124628145	1.114572616	3.773567181	1.564139983	7.46	1.14	2.28	5.91	-1.73	1.49	0.99
RhW3-W-Rh	0.793796904	-2.004758198	2.328928614	0.843129512	3.230676599	2.35187528	7.46	1.14	2.28	5.91	-1.73	1.49	0.99
RhRe3-Re-Rh	0.793841244	-2.023394145	2.350428592	0.549302442	2.906685112	1.934958815	7.46	1.14	2.28	5.91	-1.73	1.49	0.99
RhOs3-Os-Rh	0.793495275	-2.053388043	2.236597131	0.212933723	2.853315021	2.207872028	7.46	1.14	2.28	5.91	-1.73	1.49	0.99
RhIr3-Ir-Rh	0.787340901	-1.90956865	2.124082573	0.005735311	2.999176208	2.207872028	7.46	1.14	2.28	5.91	-1.73	1.49	0.99
RhPt3-Pt-Rh	0.798322834	-1.620261929	2.005600341	-0.140854255	3.142772657	2.28	7.46	1.14	2.28	5.91	-1.73	1.49	0.99
RhAu3-Au-Rh	0.818888789	-1.26517036	1.869782924	-0.537268426	4.202850997	2.512718456	7.46	1.14	2.28	5.91	-1.73	1.49	0.99
PdSc3-Sc-Pd	0.928482281	-2.996881388	1.442594753	2.862730397	10.74989976	1.427010884	8.34	0.56	2.2	5.9	-1.83	1.52	0.94
PdTi3-Ti-Pd	0.934587264	-2.86805036	1.446143879	2.384986669	8.528717143	1.595919263	8.34	0.56	2.2	5.9	-1.83	1.52	0.94
PdV3-V-Pd	0.92631298	-2.582005058	1.488032872	1.758575043	5.964759541	1.679620289	8.34	0.56	2.2	5.9	-1.83	1.52	0.94
PdCr3-Cr-Pd	0.924928191	-2.605039437	1.507515033	1.490652041	5.482383893	1.707416788	8.34	0.56	2.2	5.9	-1.83	1.52	0.94
PdMn3-Mn-Pd	0.917644734	-2.549980515	1.500774799	1.415749435	5.873174564	1.605243043	8.34	0.56	2.2	5.9	-1.83	1.52	0.94
PdFe3-Fe-Pd	0.930726437	-2.186280597	1.402419156	1.256162634	6.07688693	1.864010047	8.34	0.56	2.2	5.9	-1.83	1.52	0.94
PdCo3-Co-Pd	0.924728709	-2.251286317	1.419319953	1.064523689	5.581808864	1.90978436	8.34	0.56	2.2	5.9	-1.83	1.52	0.94
PdNi3-Ni-Pd	0.91777328	-2.04474387	1.399891667	1.03755365	5.400108029	1.937190357	8.34	0.56	2.2	5.9	-1.83	1.52	0.94
PdCu3-Cu-Pd	0.935081215	-1.795700978	1.379815972	0.846134988	5.836450964	1.928059841	8.34	0.56	2.2	5.9	-1.83	1.52	0.94
PdY3-Y-Pd	0.920630949	-2.624363736	1.445034425	2.834648339	10.73527551	1.29409487	8.34	0.56	2.2	5.9	-1.83	1.52	0.94
PdZr3-Zr-Pd	0.915769117	-2.981268153	1.669943495	2.419125587	8.718027525	1.398649019	8.34	0.56	2.2	5.9	-1.83	1.52	0.94
PdNb3-Nb-Pd	0.905864483	-2.877376018	1.807689291	1.963091597	6.63729045	1.65177258	8.34	0.56	2.2	5.9	-1.83	1.52	0.94
PdMo3-Mo-Pd	0.910596407	-2.689896161	1.765960855	1.52633191	5.269458698	2.163967052	8.34	0.56	2.2	5.9	-1.83	1.52	0.94
PdRu3-Ru-Pd	0.907927042	-2.55747579	1.623837023	0.820729422	3.932358244	2.2	8.34	0.56	2.2	5.9	-1.83	1.52	0.94
PdRh3-Rh-Pd	0.913214349	-2.172830006	1.531213681	0.642902465	4.116596032	2.271870804	8.34	0.56	2.2	5.9	-1.83	1.52	0.94
PdAg3-Ag-Pd	0.938414419	-1.730295193	1.431759793	-0.23235202	5.819986148	1.95543708	8.34	0.56	2.2	5.9	-1.83	1.52	0.94
PdLa3-La-Pd	0.928908991	-2.786655782	1.474390264	2.404688804	13.63154322	1.178950809	8.34	0.56	2.2	5.9	-1.83	1.52	0.94
PdTa3-Ta-Pd	0.90821506	-2.999694636	1.92040608	1.878864338	6.607912278	1.558563141	8.34	0.56	2.2	5.9	-1.83	1.52	0.94
PdW3-W-Pd	0.907585041	-2.792367027	1.924510559	1.422502778	5.156627134	2.343489817	8.34	0.56	2.2	5.9	-1.83	1.52	0.94
PdRe3-Re-Pd	0.915340049	-3.075664215	1.825339802	0.923247039	3.863047119	1.928059841	8.34	0.56	2.2	5.9	-1.83	1.52	0.94
PdOs3-Os-Pd	0.904817233	-2.888382078	1.863123155	0.614661864	3.820790134	2.2	8.34	0.56	2.2	5.9	-1.83	1.52	0.94
PdIr3-Ir-Pd	0.90745946	-2.417857263	1.741837473	0.287250834	3.745903704	2.2	8.34	0.56	2.2	5.9	-1.83	1.52	0.94
PdPt3-Pt-Pd	0.91471626	-1.971263393	1.639975277	0.071747978	3.77731257	2.271870804	8.34	0.56	2.2	5.9	-1.83	1.52	0.94
PdAu3-Au-Pd	0.929046214	-1.739287638	1.614824878	-0.303901671	4.643673578	2.503759517	8.34	0.56	2.2	5.9	-1.83	1.52	0.94
AgSc3-Sc-Ag	0.968839359	-4.720588464	1.28917696	4.618660222	24.73894523	1.408447776	7.58	1.3	1.93	5.01	-4.3	1.59	0.89
AgTi3-Ti-Ag	0.975903322	-4.419059662	1.149906527	4.330231088	23.01126868	1.57515893	7.58	1.3	1.93	5.01	-4.3	1.59	0.89
AgCr3-Cr-Ag	0.972935525	-4.252076507	1.216197532	3.405075562	16.26122391	1.685206052	7.58	1.3	1.93	5.01	-4.3	1.59	0.89
AgMn3-Mn-Ag	0.96837869	-4.144617896	1.206354215	3.259368005	16.63333854	1.584361422	7.58	1.3	1.93	5.01	-4.3	1.59	0.89
AgFe3-Fe-Ag	0.97489898	-4.097964755	1.120860952	3.602507095	19.85848221	1.839762285	7.58	1.3	1.93	5.01	-4.3	1.59	0.89
AgCo3-Co-Ag	0.973558345	-3.95336791	1.17977752	3.128849066	16.68107764	1.884941148	7.58	1.3	1.93	5.01	-4.3	1.59	0.89
AgNi3-Ni-Ag	0.974849271	-3.697729979	1.141995721	3.264417026	17.41460087	1.911990638	7.58	1.3	1.93	5.01	-4.3	1.59	0.89
AgCu3-Cu-Ag	0.977212263	-3.995232363	1.162312388	3.1944674	17.84541008	1.902978895	7.58	1.3	1.93	5.01	-4.3	1.59	0.89
AgY3-Y-Ag	0.960837743	-4.776255759	1.360962551	4.621164259	24.84051412	1.277260785	7.58	1.3	1.93	5.01	-4.3	1.59	0.89
AgZr3-Zr-Ag	0.961134923	-4.650682502	1.484427918	3.978904095	19.33987996	1.380454853	7.58	1.3	1.93	5.01	-4.3	1.59	0.89
AgNb3-Nb-Ag	0.963559502	-4.443053915	1.448573298	3.479775697	15.65559671	1.630285685	7.58	1.3	1.93	5.01	-4.3	1.59	0.89
AgMo3-Mo-Ag	0.964924325	-4.396341648	1.384064968	3.084226515	13.64859412	2.135817334	7.58	1.3	1.93	5.01	-4.3	1.59	0.89
AgRu3-Ru-Ag	0.970277787	-3.767187274	1.24131304	2.403092037	10.84073824	2.171381551	7.58	1.3	1.93	5.01	-4.3	1.59	0.89
AgRh3-Rh-Ag	0.976289847	-3.328391833	1.136958971	2.29055887	11.36146941	2.242317432	7.58	1.3	1.93	5.01	-4.3	1.59	0.89
AgPd3-Pd-Ag	0.980598782	-3.122396657	1.107193498	2.233074871	10.82019873	2.171381551	7.58	1.3	1.93	5.01	-4.3	1.59	0.89
AgAg3-Ag-Ag	0.97992944	-3.974864706	1.130887216	2.416482511	16.56903142	1.93	7.58	1.3	1.93	5.01	-4.3	1.59	0.89
AgLa3-La-Ag	0.966188206	-4.303115269	1.168258048	4.840697101	30.00030425	1.163614562	7.58	1.3	1.93	5.01	-4.3	1.59	0.89
AgTa3-Ta-Ag	0.961568861	-4.502277375	1.548129572	3.235926734	14.3487418	1.53828875	7.58	1.3	1.93	5.01	-4.3	1.59	0.89
AgW3-W-Ag	0.962873529	-4.465549422	1.500318803	2.842179366	12.47592268	2.313004798	7.58	1.3	1.93	5.01	-4.3	1.59	0.89
AgRe3-Re-Ag	0.963739092	-4.435650409	1.495123653	2.434931593	10.61260901	1.902978895	7.58	1.3	1.93	5.01	-4.3	1.59	0.89
AgOs3-Os-Ag	0.968028326	-4.162428453	1.41182192	1.977656411	9.327447016	2.171381551	7.58	1.3	1.93	5.01	-4.3	1.59	0.89
AgIr3-Ir-Ag	0.976575205	-3.332591082	1.198056344	1.614405892	9.702879873	2.171381551	7.58	1.3	1.93	5.01	-4.3	1.59	0.89
AgPt3-Pt-Ag	0.977494241	-3.151056352	1.207357789	1.600527333	8.699067564	2.242317432	7.58	1.3	1.93	5.01	-4.3	1.59	0.89
AgAu3-Au-Ag	0.979949285	-3.772867155	1.23652373	1.691086171	11.05835632	2.471189647	7.58	1.3	1.93	5.01	-4.3	1.59	0.89
OsSc3-Sc-Os	0.728666277	-0.971613971	2.103346876	1.305016279	3.565580709	1.427010884	8.7	1.1	2.2	6.25	-1.5	1.49	1.13
OsTi3-Ti-Os	0.740826473	-1.273975386	2.195691563	1.106315618	3.070095297	1.595919263	8.7	1.1	2.2	6.25	-1.5	1.49	1.13
OsV3-V-Os	0.693938577	-1.166717873	2.236872274	0.746850928	2.439277386	1.679620289	8.7	1.1	2.2	6.25	-1.5	1.49	1.13
OsCr3-Cr-Os	0.691768865	-1.145089608	2.231802778	0.479391681	2.26240874	1.707416788	8.7	1.1	2.2	6.25	-1.5	1.49	1.13
OsMn3-Mn-Os	0.687685648	-1.156421814	2.271090201	0.462197538	2.458397461	1.605243043	8.7	1.1	2.2	6.25	-1.5	1.49	1.13
OsFe3-Fe-Os	0.699786157	-1.106931231	2.054157988	0.380658549	2.721070296	1.864010047	8.7	1.1	2.2	6.25	-1.5	1.49	1.13
OsCo3-Co-Os	0.693529539	-1.181768185	2.098247377	0.247244218	2.636850118	1.90978436	8.7	1.1	2.2	6.25	-1.5	1.49	1.13
OsNi3-Ni-Os	0.690626264	-1.310776572	2.040261513	0.331734148	2.760040174	1.937190357	8.7	1.1	2.2	6.25	-1.5	1.49	1.13
OsCu3-Cu-Os	0.716262892	-0.907369468	1.930384077	-0.05465655	3.259589537	1.928059841	8.7	1.1	2.2	6.25	-1.5	1.49	1.13
OsY3-Y-Os	0.707917604	-1.008322781	1.964483134	1.252933647	3.691937888	1.29409487	8.7	1.1	2.2	6.25	-1.5	1.49	1.13
OsZr3-Zr-Os	0.70421832	-1.196115804	2.174265502	0.957937473	2.989898097	1.398649019	8.7	1.1	2.2	6.25	-1.5	1.49	1.13
OsNb3-Nb-Os	0.692496261	-1.25174102	2.330935992	0.752911433	2.647458591	1.65177258	8.7	1.1	2.2	6.25	-1.5	1.49	1.13
OsMo3-Mo-Os	0.683343322	-1.253297166	2.509709489	0.510128443	2.287096882	2.163967052	8.7	1.1	2.2	6.25	-1.5	1.49	1.13
OsRu3-Ru-Os	0.670254156	-1.495507905	2.391278805	0.130667022	2.17347079	2.2	8.7	1.1	2.2	6.25	-1.5	1.49	1.13
OsRh3-Rh-Os	0.676586195	-1.498824	2.288379561	0.069400921	2.356781478	2.271870804	8.7	1.1	2.2	6.25	-1.5	1.49	1.13
OsPd3-Pd-Os	0.686444229	-1.285632154	2.140929093	-0.119941757	2.586073072	2.2	8.7	1.1	2.2	6.25	-1.5	1.49	1.13
OsAg3-Ag-Os	0.718577064	-0.854759352	2.033984667	-0.66615897	4.05863024	1.95543708	8.7	1.1	2.2	6.25	-1.5	1.49	1.13
OsLa3-La-Os	0.685821708	-0.859073432	2.182539583	-0.141241439	8.723684807	1.178950809	8.7	1.1	2.2	6.25	-1.5	1.49	1.13
OsTa3-Ta-Os	0.691671596	-1.408611793	2.406228007	0.682846514	2.668433646	1.558563141	8.7	1.1	2.2	6.25	-1.5	1.49	1.13
OsW3-W-Os	0.687878978	-1.442707446	2.638106485	0.487452606	2.45089057	2.343489817	8.7	1.1	2.2	6.25	-1.5	1.49	1.13
OsRe3-Re-Os	0.688581652	-1.537342279	2.80380171	0.265579423	2.255021835	1.928059841	8.7	1.1	2.2	6.25	-1.5	1.49	1.13
OsOs3-Os-Os	0.679015427	-1.675371806	2.736540281	0.028664313	2.25739068	2.2	8.7	1.1	2.2	6.25	-1.5	1.49	1.13
OsIr3-Ir-Os	0.674959618	-1.649478741	2.606535316	-0.119507791	2.393342165	2.2	8.7	1.1	2.2	6.25	-1.5	1.49	1.13
OsPt3-Pt-Os	0.687774925	-1.547454747	2.488622756	-0.227638304	2.486915917	2.271870804	8.7	1.1	2.2	6.25	-1.5	1.49	1.13
OsAu3-Au-Os	0.703270277	-1.186831531	2.280552526	-0.609852387	3.307153656	2.503759517	8.7	1.1	2.2	6.25	-1.5	1.49	1.13
IrSc3-Sc-Ir	0.853052602	-1.946429712	1.693978415	1.733752049	5.002824113	1.427010884	9.1	1.57	2.2	6.63	-2.11	1.5	1.08
IrTi3-Ti-Ir	0.813954293	-2.046484856	2.070852595	1.484417384	4.189037324	1.595919263	9.1	1.57	2.2	6.63	-2.11	1.5	1.08
IrV3-V-Ir	0.823314483	-1.872217422	1.868908295	0.974394025	2.960348441	1.679620289	9.1	1.57	2.2	6.63	-2.11	1.5	1.08
IrFe3-Fe-Ir	0.796183531	-1.459994052	1.874730233	0.658063792	3.439926646	1.864010047	9.1	1.57	2.2	6.63	-2.11	1.5	1.08
IrCo3-Co-Ir	0.806547291	-1.601576649	1.916147082	0.51740564	3.216877946	1.90978436	9.1	1.57	2.2	6.63	-2.11	1.5	1.08
IrNi3-Ni-Ir	0.803300571	-1.60080832	1.863386127	0.571553687	3.316200502	1.937190357	9.1	1.57	2.2	6.63	-2.11	1.5	1.08
IrCu3-Cu-Ir	0.821110536	-1.236698668	1.798666087	0.241345579	3.579892348	1.928059841	9.1	1.57	2.2	6.63	-2.11	1.5	1.08
IrY3-Y-Ir	0.836857961	-1.7984178	1.846612832	1.663219609	4.985591386	1.29409487	9.1	1.57	2.2	6.63	-2.11	1.5	1.08
IrZr3-Zr-Ir	0.826763273	-1.951828275	1.991650727	1.352256239	4.020593012	1.398649019	9.1	1.57	2.2	6.63	-2.11	1.5	1.08
IrNb3-Nb-Ir	0.810192364	-1.943688308	2.16938303	1.115239786	3.450771656	1.65177258	9.1	1.57	2.2	6.63	-2.11	1.5	1.08
IrMo3-Mo-Ir	0.792003591	-1.924526695	2.306350651	0.815945507	2.822112014	2.163967052	9.1	1.57	2.2	6.63	-2.11	1.5	1.08
IrRu3-Ru-Ir	0.778255155	-1.903353969	2.189901877	0.385680621	2.57564174	2.2	9.1	1.57	2.2	6.63	-2.11	1.5	1.08
IrRh3-Rh-Ir	0.777919597	-1.83583865	2.105638324	0.294394827	2.722609416	2.271870804	9.1	1.57	2.2	6.63	-2.11	1.5	1.08
IrPd3-Pd-Ir	0.781213269	-1.508589877	1.957130131	0.112653637	2.876141467	2.2	9.1	1.57	2.2	6.63	-2.11	1.5	1.08
IrAg3-Ag-Ir	0.828570927	-1.134010093	1.877318813	-0.468516372	4.240556095	1.95543708	9.1	1.57	2.2	6.63	-2.11	1.5	1.08
IrLa3-La-Ir	0.835445192	-2.058958485	2.060451227	0.983656556	6.890090009	1.178950809	9.1	1.57	2.2	6.63	-2.11	1.5	1.08
IrTa3-Ta-Ir	0.812175342	-2.064392756	2.271169206	1.041060801	3.455916353	1.558563141	9.1	1.57	2.2	6.63	-2.11	1.5	1.08
IrW3-W-Ir	0.796565431	-2.118514875	2.529032999	0.821068592	3.015388478	2.343489817	9.1	1.57	2.2	6.63	-2.11	1.5	1.08
IrRe3-Re-Ir	0.854839736	-2.573361447	2.195073813	0.337687513	2.528932237	1.928059841	9.1	1.57	2.2	6.63	-2.11	1.5	1.08
IrOs3-Os-Ir	0.785633487	-2.156120009	2.501312703	0.253015347	2.561965847	2.2	9.1	1.57	2.2	6.63	-2.11	1.5	1.08
IrIr3-Ir-Ir	0.778082164	-2.104329573	2.39923823	0.077850907	2.622278433	2.2	9.1	1.57	2.2	6.63	-2.11	1.5	1.08
IrPt3-Pt-Ir	0.782636719	-1.813440216	2.265968197	-0.049366961	2.71556461	2.271870804	9.1	1.57	2.2	6.63	-2.11	1.5	1.08
IrAu3-Au-Ir	0.808064811	-1.429759953	2.108683219	-0.437930446	3.440448802	2.503759517	9.1	1.57	2.2	6.63	-2.11	1.5	1.08
PtSc3-Sc-Pt	0.888305621	-2.876592154	1.855433824	2.400826255	7.881234905	1.432117007	9	2.13	2.28	6.74	-2.25	1.53	1.04
PtTi3-Ti-Pt	0.899397702	-2.90671686	1.769753422	2.116978977	6.855078701	1.601629773	9	2.13	2.28	6.74	-2.25	1.53	1.04
PtV3-V-Pt	0.878740214	-2.527450605	1.835039959	1.566000331	4.896024665	1.685630297	9	2.13	2.28	6.74	-2.25	1.53	1.04
PtCr3-Cr-Pt	0.880518269	-2.611308797	1.808158493	1.332790413	4.440979602	1.713526258	9	2.13	2.28	6.74	-2.25	1.53	1.04
PtMn3-Mn-Pt	0.872610875	-2.771858823	1.860931073	1.397699408	4.981218808	1.610986915	9	2.13	2.28	6.74	-2.25	1.53	1.04
PtFe3-Fe-Pt	0.890756648	-2.226692934	1.653067688	1.158081725	4.919960139	1.870679838	9	2.13	2.28	6.74	-2.25	1.53	1.04
PtCo3-Co-Pt	0.884991164	-2.276511642	1.662045185	0.999505587	4.623314962	1.91661794	9	2.13	2.28	6.74	-2.25	1.53	1.04
PtNi3-Ni-Pt	0.886119543	-2.118997595	1.629489238	1.003869835	4.558497066	1.944122002	9	2.13	2.28	6.74	-2.25	1.53	1.04
PtCu3-Cu-Pt	0.899103156	-1.832584912	1.621687232	0.822019815	4.842226032	1.934958815	9	2.13	2.28	6.74	-2.25	1.53	1.04
PtY3-Y-Pt	0.872793514	-2.803379228	1.762135789	2.427287604	8.260824549	1.298725394	9	2.13	2.28	6.74	-2.25	1.53	1.04
PtZr3-Zr-Pt	0.868424214	-2.809282582	1.914229444	2.037871486	6.571664387	1.403653657	9	2.13	2.28	6.74	-2.25	1.53	1.04
PtNb3-Nb-Pt	0.866579458	-2.710570746	2.080484632	1.680947455	5.202762139	1.657682944	9	2.13	2.28	6.74	-2.25	1.53	1.04
PtMo3-Mo-Pt	0.866150014	-2.62547674	2.08107298	1.314223283	4.15128324	2.171710148	9	2.13	2.28	6.74	-2.25	1.53	1.04
PtRu3-Ru-Pt	0.863847103	-2.545835462	1.893035234	0.793178841	3.434576185	2.207872028	9	2.13	2.28	6.74	-2.25	1.53	1.04
PtRh3-Rh-Pt	0.868284045	-2.299860645	1.816784446	0.6900245	3.594585018	2.28	9	2.13	2.28	6.74	-2.25	1.53	1.04
PtPd3-Pd-Pt	0.879963925	-1.83921982	1.669389781	0.488791991	3.526338896	2.207872028	9	2.13	2.28	6.74	-2.25	1.53	1.04
PtAg3-Ag-Pt	0.904345647	-1.70119195	1.622711948	-0.083061442	4.861081433	1.962434014	9	2.13	2.28	6.74	-2.25	1.53	1.04
PtLa3-La-Pt	0.87573291	-3.038329907	1.856687769	1.921237177	9.157935121	1.183169324	9	2.13	2.28	6.74	-2.25	1.53	1.04
PtTa3-Ta-Pt	0.862445911	-2.832284726	2.205559717	1.610066631	5.184230085	1.564139983	9	2.13	2.28	6.74	-2.25	1.53	1.04
PtW3-W-Pt	0.862379231	-2.764419083	2.270355863	1.245129355	4.106193188	2.35187528	9	2.13	2.28	6.74	-2.25	1.53	1.04
PtRe3-Re-Pt	0.864150659	-2.886946071	2.236808792	0.961766366	3.597036915	1.934958815	9	2.13	2.28	6.74	-2.25	1.53	1.04
PtOs3-Os-Pt	0.866497834	-2.957652528	2.181937448	0.620473067	3.280424455	2.207872028	9	2.13	2.28	6.74	-2.25	1.53	1.04
PtIr3-Ir-Pt	0.864142378	-2.591128978	2.056333357	0.390452883	3.184835156	2.207872028	9	2.13	2.28	6.74	-2.25	1.53	1.04
PtPt3-Pt-Pt	0.878107979	-2.114016448	1.898724394	0.207793266	3.249326574	2.28	9	2.13	2.28	6.74	-2.25	1.53	1.04
PtAu3-Au-Pt	0.896648638	-1.828230957	1.852446187	-0.069694013	4.016319831	2.512718456	9	2.13	2.28	6.74	-2.25	1.53	1.04
AuSc3-Sc-Au	0.957927893	-4.465280983	1.473967653	3.811741301	17.22197234	1.447666049	9.23	2.31	2.54	6.01	-3.56	1.59	1.01
AuTi3-Ti-Au	0.968755358	-4.122243379	1.320701364	3.44553891	15.06445962	1.619019279	9.23	2.31	2.54	6.01	-3.56	1.59	1.01
AuFe3-Fe-Au	0.961060364	-3.756957786	1.346327765	2.639237949	11.93190696	1.890990523	9.23	2.31	2.54	6.01	-3.56	1.59	1.01
AuCo3-Co-Au	0.965255472	-3.655785036	1.376368218	2.348908081	10.71646399	1.937427394	9.23	2.31	2.54	6.01	-3.56	1.59	1.01
AuNi3-Ni-Au	0.966471527	-3.35471392	1.334050426	2.394756475	10.82275283	1.965230077	9.23	2.31	2.54	6.01	-3.56	1.59	1.01
AuCu3-Cu-Au	0.970159986	-3.581527323	1.363427836	2.268248063	10.78496463	1.955967402	9.23	2.31	2.54	6.01	-3.56	1.59	1.01
AuY3-Y-Au	0.952835944	-4.371443591	1.543324203	3.79902548	17.35141404	1.312826151	9.23	2.31	2.54	6.01	-3.56	1.59	1.01
AuZr3-Zr-Au	0.950466826	-4.299794839	1.699710307	3.251518538	13.46675364	1.418893661	9.23	2.31	2.54	6.01	-3.56	1.59	1.01
AuNb3-Nb-Au	0.948912269	-4.184706797	1.722670554	2.790146736	10.55406439	1.675681041	9.23	2.31	2.54	6.01	-3.56	1.59	1.01
AuMo3-Mo-Au	0.950327718	-4.123189736	1.682073697	2.390618999	8.83051036	2.195289235	9.23	2.31	2.54	6.01	-3.56	1.59	1.01
AuRu3-Ru-Au	0.95625211	-3.569180486	1.488439051	1.807220113	7.046930483	2.231843738	9.23	2.31	2.54	6.01	-3.56	1.59	1.01
AuRh3-Rh-Au	0.962233069	-3.111801349	1.419233212	1.627578488	6.754369213	2.304754831	9.23	2.31	2.54	6.01	-3.56	1.59	1.01
AuPd3-Pd-Au	0.972491965	-2.747106977	1.305664607	1.550087911	6.733906679	2.231843738	9.23	2.31	2.54	6.01	-3.56	1.59	1.01
AuAg3-Ag-Au	0.9736742	-3.508196888	1.329120496	1.497970309	9.833271968	1.98374091	9.23	2.31	2.54	6.01	-3.56	1.59	1.01
AuLa3-La-Au	0.94805709	-4.038149457	1.394816075	3.766359587	19.67898089	1.196015446	9.23	2.31	2.54	6.01	-3.56	1.59	1.01
AuTa3-Ta-Au	0.946134015	-4.261553749	1.857540544	2.606954767	9.812462014	1.581122449	9.23	2.31	2.54	6.01	-3.56	1.59	1.01
AuW3-W-Au	0.947964386	-4.179955773	1.82797983	2.205630597	8.193139932	2.377410488	9.23	2.31	2.54	6.01	-3.56	1.59	1.01
AuRe3-Re-Au	0.956380263	-4.242123675	1.654635926	1.722077179	6.368413705	1.955967402	9.23	2.31	2.54	6.01	-3.56	1.59	1.01
AuOs3-Os-Au	0.952020481	-4.086019162	1.715729813	1.484392571	6.184006888	2.231843738	9.23	2.31	2.54	6.01	-3.56	1.59	1.01
AuIr3-Ir-Au	0.96367606	-3.066521816	1.489907621	1.020391956	5.846290593	2.231843738	9.23	2.31	2.54	6.01	-3.56	1.59	1.01
AuPt3-Pt-Au	0.96732576	-2.889644758	1.459598889	1.077169404	5.672795516	2.304754831	9.23	2.31	2.54	6.01	-3.56	1.59	1.01
AuAu3-Au-Au	0.971938043	-3.333011239	1.453710164	1.014437326	6.872303597	2.54	9.23	2.31	2.54	6.01	-3.56	1.59	1.01
