# Supplementary material for: High-throughput screening of bimetallic catalysts enabled by machine learning
Source: Royal Society of Chemistry journal article supplement (doi:10.1039/c7ta01812f), 2017-01-01
Supplement: c7ta01812f2.csv [file c7ta01812f2.csv]

name	filling	center	sigma_c	skewness	kurtosis	local_Pauling	IonizationPotential	ElectronAffinity	Pauling	WorkFunction	dBandCenter	AtomicRadius	OrbitalRadius
Co3Sc-Co	0.17663841	1.566232581	1.873729365	-1.303725667	4.471120688	1.820102957	6.56	0.19	1.36	3.84	1.5	1.81	1.24
Co3Ti-Co	0.256708569	0.822591899	1.975539034	-0.830084745	3.39237092	1.842867608	6.83	0.08	1.54	4.63	1.5	1.61	1.08
Co3V-Co	0.38493632	0.078553066	2.114635751	-0.471971826	2.673463202	1.853364434	6.75	0.53	1.63	4.88	1.06	1.49	0.98
Co3Mn-Co	0.569236493	-0.687029584	1.786866603	-0.080035766	3.233888763	1.852292993	7.43	0	1.55	5.45	0.07	1.43	0.86
Co3Fe-Co	0.679606439	-1.099962891	1.998453413	0.214882486	2.409766788	1.874939132	7.9	0.15	1.83	5.54	-0.92	1.41	0.8
Co3Co-Co	0.773852001	-1.191808411	1.525578912	0.196888822	3.986478676	1.88	7.88	0.66	1.88	5.76	-1.17	1.39	0.76
Co3Ni-Co	0.875691478	-1.622476133	1.474588804	0.516549816	4.624330098	1.882290868	7.64	1.16	1.91	5.77	-1.29	1.38	0.71
Co3Cu-Co	0.96637096	-2.678780972	1.203971565	1.262763619	7.464465219	1.88199049	7.73	1.24	1.9	5.3	-2.67	1.41	0.67
Co3Y-Co	0.19455298	1.68377171	2.118024092	-1.060261578	3.637076762	1.767378473	6.22	0.31	1.22	3.42	1.95	1.99	1.58
Co3Nb-Co	0.413243457	-0.102694094	2.473710272	-0.3998672	2.140458416	1.849924749	6.76	0.9	1.6	4.69	1.41	1.62	1.28
Co3Mo-Co	0.516507028	-0.752728384	2.454017699	-0.131067186	2.075000228	1.906283283	7.09	0.75	2.16	5.09	0.35	1.55	1.2
Co3Ru-Co	0.737114944	-1.465514846	2.186985868	0.21744503	2.532033573	1.90978436	7.36	1.05	2.2	5.73	-1.41	1.48	1.05
Co3Rh-Co	0.817973082	-1.960056103	2.082712871	0.492816991	2.941134899	1.91661794	7.46	1.14	2.28	5.91	-1.73	1.49	0.99
Co3Pd-Co	0.920920443	-2.751473168	1.78105502	0.915746681	4.027979907	1.90978436	8.34	0.56	2.2	5.9	-1.83	1.52	0.94
Co3Ag-Co	0.978263165	-3.945473729	1.277272253	2.441974418	11.15658321	1.884941148	7.58	1.3	1.93	5.01	-4.3	1.59	0.89
Co3La-Co	0.228667337	1.4414137	2.16685715	-0.818047727	3.082591746	1.741428641	5.77	0.5	1.1	3.3	2	1.92	1.58
Co3Ta-Co	0.387353155	0.115597087	2.630645272	-0.457271952	2.065844218	1.838024052	7.89	0.32	1.5	4.86	2	1.62	1.34
Co3W-Co	0.485281825	-0.611765946	2.665803584	-0.163950875	1.934094332	1.923239033	7.98	0.86	2.36	5.09	0.77	1.56	1.27
Co3Re-Co	0.600112664	-1.339991287	2.639071925	0.119649572	2.006418368	1.881530959	7.88	0.15	1.9	5.88	-0.51	1.52	1.2
Co3Os-Co	0.704571164	-1.770469382	2.511226767	0.300860663	2.248132853	1.902869434	8.7	1.1	2.2	6.25	-1.5	1.49	1.13
Co3Ir-Co	0.800295401	-2.182002955	2.36102374	0.503287226	2.607116015	1.90978436	9.1	1.57	2.2	6.63	-2.11	1.5	1.08
Co3Pt-Co	0.887719021	-2.915096039	2.154950501	0.853142903	3.354489502	1.91661794	9	2.13	2.28	6.74	-2.25	1.53	1.04
Co3Au-Co	0.960648537	-3.855051592	1.667717066	1.627611648	6.154760028	1.937427394	9.23	2.31	2.54	6.01	-3.56	1.59	1.01
Ni3Sc-Ni	0.175869517	1.459547439	1.935925054	-1.277867963	4.325161361	1.846221998	6.56	0.19	1.36	3.84	1.5	1.81	1.24
Ni3Ti-Ni	0.247196849	0.62655758	1.965152602	-0.734957955	3.466244017	1.869313329	6.83	0.08	1.54	4.63	1.5	1.61	1.08
Ni3Cr-Ni	0.484515806	0.153974802	2.201633685	-0.212407177	2.286357805	1.883392512	6.77	0.67	1.66	5.27	0.16	1.42	0.9
Ni3Mn-Ni	0.555077874	-0.451037612	2.358166611	0.08046445	1.842998584	1.870523636	7.43	0	1.55	5.45	0.07	1.43	0.86
Ni3Fe-Ni	0.667126493	-1.420871407	2.011846545	0.271319582	2.314717814	1.901845089	7.9	0.15	1.83	5.54	-0.92	1.41	0.8
Ni3Co-Ni	0.763754144	-1.455056479	1.679369724	0.341490428	3.235725237	1.906978582	7.88	0.66	1.88	5.76	-1.17	1.39	0.76
Ni3Ni-Ni	0.868536768	-1.411365263	1.373783112	0.459400788	4.938422317	1.91	7.64	1.16	1.91	5.77	-1.29	1.38	0.71
Ni3Cu-Ni	0.96908491	-2.324534895	1.128675165	1.166272096	7.748161894	1.908997636	7.73	1.24	1.9	5.3	-2.67	1.41	0.67
Ni3Y-Ni	0.193604249	1.62177368	2.204731927	-1.059888327	3.480795987	1.826274325	6.22	0.31	1.22	3.42	1.95	1.99	1.58
Ni3Zr-Ni	0.296436393	0.585412499	2.377905052	-0.689602632	2.563908805	1.84210845	6.63	0.43	1.33	4.35	1.95	1.77	1.41
Ni3Nb-Ni	0.410831629	-0.269084908	2.455837841	-0.352688835	2.192662135	1.876471742	6.76	0.9	1.6	4.69	1.41	1.62	1.28
Ni3Mo-Ni	0.518307916	-0.865009009	2.39859559	-0.069585002	2.202312283	1.933639039	7.09	0.75	2.16	5.09	0.35	1.55	1.2
Ni3Ru-Ni	0.728657099	-1.488464543	2.097494394	0.262125544	2.668889472	1.937190357	7.36	1.05	2.2	5.73	-1.41	1.48	1.05
Ni3Rh-Ni	0.817248838	-1.867070063	1.977412063	0.518958678	3.131898898	1.944122002	7.46	1.14	2.28	5.91	-1.73	1.49	0.99
Ni3Pd-Ni	0.920616801	-2.539160338	1.726418505	0.895296678	4.112033635	1.937190357	8.34	0.56	2.2	5.9	-1.83	1.52	0.94
Ni3Ag-Ni	0.975177212	-3.911702956	1.34024651	2.311669541	10.19043873	1.911990638	7.58	1.3	1.93	5.01	-4.3	1.59	0.89
Ni3La-Ni	0.225099773	1.341937966	2.249936057	-0.794222209	2.883818248	1.765220588	5.77	0.5	1.1	3.3	2	1.92	1.58
Ni3Ta-Ni	0.38621344	-0.101332932	2.619909967	-0.394375569	2.100009052	1.864400267	7.89	0.32	1.5	4.86	2	1.62	1.34
Ni3W-Ni	0.483700284	-0.753982658	2.613947617	-0.086536597	2.035780382	1.950838109	7.98	0.86	2.36	5.09	0.77	1.56	1.27
Ni3Re-Ni	0.600087712	-1.380951829	2.517901209	0.164102774	2.150810865	1.909228904	7.88	0.15	1.9	5.88	-0.51	1.52	1.2
Ni3Os-Ni	0.69388029	-1.69593854	2.376861843	0.31706652	2.373214962	1.937190357	8.7	1.1	2.2	6.25	-1.5	1.49	1.13
Ni3Ir-Ni	0.800172808	-2.104046671	2.232177609	0.525548054	2.767019287	1.937190357	9.1	1.57	2.2	6.63	-2.11	1.5	1.08
Ni3Pt-Ni	0.889122167	-2.727345835	2.060424651	0.872734138	3.507405421	1.944122002	9	2.13	2.28	6.74	-2.25	1.53	1.04
Ni3Au-Ni	0.957915085	-3.874407314	1.722358872	1.65584438	6.185730116	1.965230077	9.23	2.31	2.54	6.01	-3.56	1.59	1.01
Cu3Sc-Cu	0.157770329	0.963072042	1.771652234	-1.34620359	5.792085285	1.837520241	6.56	0.19	1.36	3.84	1.5	1.81	1.24
Cu3Ti-Cu	0.226091001	0.47905405	1.771068843	-0.815846158	4.866577808	1.860502736	6.83	0.08	1.54	4.63	1.5	1.61	1.08
Cu3V-Cu	0.387342049	0.490537	1.964709356	-0.558426607	3.456388785	1.871100011	6.75	0.53	1.63	4.88	1.06	1.49	0.98
Cu3Cr-Cu	0.491633603	0.351729883	2.276564494	-0.215069589	2.351895166	1.87451556	6.77	0.67	1.66	5.27	0.16	1.42	0.9
Cu3Mn-Cu	0.541187451	-0.9353066	2.378767602	0.127379987	1.862450783	1.861707339	7.43	0	1.55	5.45	0.07	1.43	0.86
Cu3Fe-Cu	0.659492084	-1.225684126	1.865168013	0.177248755	2.573600852	1.892881165	7.9	0.15	1.83	5.54	-0.92	1.41	0.8
Cu3Co-Cu	0.768657461	-0.996688834	1.485209399	0.095248097	4.18374699	1.897990463	7.88	0.66	1.88	5.76	-1.17	1.39	0.76
Cu3Ni-Cu	0.890354883	-0.929680864	1.218160336	0.083111964	6.859276973	1.900997639	7.64	1.16	1.91	5.77	-1.29	1.38	0.71
Cu3Cu-Cu	0.97221492	-2.383500599	1.049694885	1.120234242	9.923549026	1.9	7.73	1.24	1.9	5.3	-2.67	1.41	0.67
Cu3Y-Cu	0.165125068	1.178106611	2.007880044	-1.223202169	4.738265339	1.817666587	6.22	0.31	1.22	3.42	1.95	1.99	1.58
Cu3Zr-Cu	0.283262529	0.313072487	2.214711569	-0.854927952	3.617335448	1.833426081	6.63	0.43	1.33	4.35	1.95	1.77	1.41
Cu3Nb-Cu	0.404585262	-0.255940908	2.242947837	-0.564716431	3.194965803	1.86762741	6.76	0.9	1.6	4.69	1.41	1.62	1.28
Cu3Mo-Cu	0.530142038	-0.50943747	2.165191975	-0.373550577	3.047209772	1.924525261	7.09	0.75	2.16	5.09	0.35	1.55	1.2
Cu3Ru-Cu	0.749028786	-0.978936504	1.866150707	-0.065902058	3.38686369	1.928059841	7.36	1.05	2.2	5.73	-1.41	1.48	1.05
Cu3Rh-Cu	0.82815374	-1.2454293	1.76419009	0.185055137	3.701358101	1.934958815	7.46	1.14	2.28	5.91	-1.73	1.49	0.99
Cu3Pd-Cu	0.929688959	-2.180372713	1.579839041	0.654024208	4.601614559	1.928059841	8.34	0.56	2.2	5.9	-1.83	1.52	0.94
Cu3Ag-Cu	0.977056794	-4.295907557	1.351058573	2.306789484	11.18238394	1.902978895	7.58	1.3	1.93	5.01	-4.3	1.59	0.89
Cu3La-Cu	0.186424625	1.106038168	2.052122301	-0.887614558	4.005461113	1.757295912	5.77	0.5	1.1	3.3	2	1.92	1.58
Cu3Ta-Cu	0.373661222	-0.198248688	2.398808471	-0.552206233	3.040732801	1.855612831	7.89	0.32	1.5	4.86	2	1.62	1.34
Cu3W-Cu	0.479939303	-0.458088145	2.297962819	-0.374412972	2.951249006	1.941643267	7.98	0.86	2.36	5.09	0.77	1.56	1.27
Cu3Re-Cu	0.617460884	-0.827240377	2.231047225	-0.199168659	2.828781497	1.9	7.88	0.15	1.9	5.88	-0.51	1.52	1.2
Cu3Os-Cu	0.725466783	-1.089181534	2.117391262	-0.039338152	2.89001393	1.928059841	8.7	1.1	2.2	6.25	-1.5	1.49	1.13
Cu3Ir-Cu	0.817713931	-1.470271226	2.010890273	0.218901991	3.091653807	1.928059841	9.1	1.57	2.2	6.63	-2.11	1.5	1.08
Cu3Pt-Cu	0.901296527	-2.267235202	1.869685582	0.635022882	3.755402329	1.934958815	9	2.13	2.28	6.74	-2.25	1.53	1.04
Cu3Au-Cu	0.963976344	-4.046061678	1.666163026	1.649231711	6.87978983	1.955967402	9.23	2.31	2.54	6.01	-3.56	1.59	1.01
Ru3Sc-Ru	0.182625047	1.857238461	2.049209618	-1.475395605	4.380635568	2.096690385	6.56	0.19	1.36	3.84	1.5	1.81	1.24
Ru3Ti-Ru	0.245603715	1.044311502	1.943389915	-1.091826693	3.810674539	2.122914409	6.83	0.08	1.54	4.63	1.5	1.61	1.08
Ru3V-Ru	0.375456062	0.169423873	1.937983993	-0.763283614	3.191001133	2.13500636	6.75	0.53	1.63	4.88	1.06	1.49	0.98
Ru3Cr-Ru	0.482432524	0.059901458	2.163312499	-0.328663844	2.266570678	2.13890365	6.77	0.67	1.66	5.27	0.16	1.42	0.9
Ru3Mn-Ru	0.551405632	-0.479883383	1.688473839	-0.410827495	3.490617956	2.124288913	7.43	0	1.55	5.45	0.07	1.43	0.86
Ru3Fe-Ru	0.661579875	-1.252789708	1.953974478	0.136918085	2.141205042	2.159859603	7.9	0.15	1.83	5.54	-0.92	1.41	0.8
Ru3Co-Ru	0.766052461	-1.252606524	1.571190354	0.1059601	3.221389652	2.165689534	7.88	0.66	1.88	5.76	-1.17	1.39	0.76
Ru3Ni-Ru	0.87531247	-1.344762005	1.289588246	0.18647535	4.961372853	2.169120853	7.64	1.16	1.91	5.77	-1.29	1.38	0.71
Ru3Y-Ru	0.213366147	1.965976208	2.342865335	-1.142119823	3.267918946	2.074036504	6.22	0.31	1.22	3.42	1.95	1.99	1.58
Ru3Zr-Ru	0.300432199	1.133538192	2.536726928	-0.859107623	2.562208793	2.09201877	6.63	0.43	1.33	4.35	1.95	1.77	1.41
Ru3Nb-Ru	0.398237568	0.243351452	2.521587292	-0.569897095	2.198747794	2.131043972	6.76	0.9	1.6	4.69	1.41	1.62	1.28
Ru3Mo-Ru	0.500337722	-0.475134324	2.426979958	-0.313896101	2.105085375	2.195966891	7.09	0.75	2.16	5.09	0.35	1.55	1.2
Ru3Ru-Ru	0.705136056	-1.408708804	2.077544437	0.107532314	2.469528899	2.2	7.36	1.05	2.2	5.73	-1.41	1.48	1.05
Ru3Rh-Ru	0.802176305	-1.76013921	1.930455227	0.348476631	2.869521287	2.207872028	7.46	1.14	2.28	5.91	-1.73	1.49	0.99
Ru3Pd-Ru	0.90900781	-2.49060527	1.684790187	0.768306308	3.741706164	2.2	8.34	0.56	2.2	5.9	-1.83	1.52	0.94
Ru3Ag-Ru	0.969828629	-4.010421038	1.453608785	2.011569716	8.090919079	2.171381551	7.58	1.3	1.93	5.01	-4.3	1.59	0.89
Ru3La-Ru	0.258371424	1.651583399	2.414867177	-0.892070229	2.6720873	1.992592061	5.77	0.5	1.1	3.3	2	1.92	1.58
Ru3Ta-Ru	0.377016069	0.48960545	2.676021708	-0.623777848	2.168588268	2.117334815	7.89	0.32	1.5	4.86	2	1.62	1.34
Ru3W-Ru	0.46973478	-0.297493539	2.631444178	-0.356581562	1.99315868	2.215499279	7.98	0.86	2.36	5.09	0.77	1.56	1.27
Ru3Re-Ru	0.587597002	-1.084988233	2.482703155	-0.161197996	1.865307726	2.167982503	7.88	0.15	1.9	5.88	-0.51	1.52	1.2
Ru3Os-Ru	0.677799981	-1.525663972	2.397188634	0.123623583	2.126006492	2.2	8.7	1.1	2.2	6.25	-1.5	1.49	1.13
Ru3Ir-Ru	0.778469678	-1.983696831	2.224422333	0.376796914	2.485497696	2.2	9.1	1.57	2.2	6.63	-2.11	1.5	1.08
Ru3Pt-Ru	0.874153148	-2.566703335	2.00287949	0.717603261	3.162534288	2.207872028	9	2.13	2.28	6.74	-2.25	1.53	1.04
Ru3Au-Ru	0.949631507	-3.78573895	1.743345262	1.515392122	5.471824469	2.231843738	9.23	2.31	2.54	6.01	-3.56	1.59	1.01
Rh3Sc-Rh	0.16833384	1.743502635	2.061346699	-1.487837592	4.577597224	2.165186214	6.56	0.19	1.36	3.84	1.5	1.81	1.24
Rh3V-Rh	0.370707605	-0.00464058	1.936667322	-0.732828865	3.340265716	2.204753916	6.75	0.53	1.63	4.88	1.06	1.49	0.98
Rh3Cr-Rh	0.475179802	0.107749673	2.222472713	-0.29193147	2.236542688	2.208778525	6.77	0.67	1.66	5.27	0.16	1.42	0.9
Rh3Mn-Rh	0.561470146	-0.542548557	1.624747771	-0.459806687	4.054428115	2.193686346	7.43	0	1.55	5.45	0.07	1.43	0.86
Rh3Fe-Rh	0.654942588	-1.388102649	2.01377108	0.154212804	2.076293781	2.230419078	7.9	0.15	1.83	5.54	-0.92	1.41	0.8
Rh3Co-Rh	0.762745891	-1.370424317	1.627658072	0.136746426	3.056250704	2.236439464	7.88	0.66	1.88	5.76	-1.17	1.39	0.76
Rh3Ni-Rh	0.867245368	-1.220283532	1.259335222	0.054864212	5.423720544	2.23998288	7.64	1.16	1.91	5.77	-1.29	1.38	0.71
Rh3Cu-Rh	0.967621057	-2.11544032	1.067294135	0.746405809	7.313183556	2.238807342	7.73	1.24	1.9	5.3	-2.67	1.41	0.67
Rh3Y-Rh	0.189932649	2.003441389	2.406136481	-1.241703523	3.504101643	2.141792263	6.22	0.31	1.22	3.42	1.95	1.99	1.58
Rh3Zr-Rh	0.278276722	0.897199858	2.533833089	-0.892369611	2.677254631	2.160361984	6.63	0.43	1.33	4.35	1.95	1.77	1.41
Rh3Nb-Rh	0.384050361	-0.019251944	2.519347935	-0.568598968	2.298395005	2.200662082	6.76	0.9	1.6	4.69	1.41	1.62	1.28
Rh3Mo-Rh	0.492539848	-0.643947919	2.399993816	-0.322785679	2.257026615	2.267705939	7.09	0.75	2.16	5.09	0.35	1.55	1.2
Rh3Ru-Rh	0.717005282	-1.41750866	2.017976353	0.035414515	2.696510595	2.271870804	7.36	1.05	2.2	5.73	-1.41	1.48	1.05
Rh3Rh-Rh	0.790998876	-1.695848465	1.876662314	0.260372166	3.11956573	2.28	7.46	1.14	2.28	5.91	-1.73	1.49	0.99
Rh3Pd-Rh	0.912363414	-2.284273822	1.625384217	0.616810982	3.876149955	2.271870804	8.34	0.56	2.2	5.9	-1.83	1.52	0.94
Rh3Ag-Rh	0.97338109	-3.716564606	1.367978802	1.932978148	8.37613837	2.242317432	7.58	1.3	1.93	5.01	-4.3	1.59	0.89
Rh3La-Rh	0.222499235	1.727967222	2.477422825	-0.985600026	2.865285899	2.119730412	5.77	0.5	1.1	3.3	2	1.92	1.58
Rh3Ta-Rh	0.356496312	0.223967141	2.683507246	-0.617748934	2.231150335	2.186505067	7.89	0.32	1.5	4.86	2	1.62	1.34
Rh3W-Rh	0.457029025	-0.498838598	2.62536995	-0.346502366	2.097714329	2.287876422	7.98	0.86	2.36	5.09	0.77	1.56	1.27
Rh3Re-Rh	0.572430286	-1.109940728	2.504105096	-0.118447166	2.114273237	2.238807342	7.88	0.15	1.9	5.88	-0.51	1.52	1.2
Rh3Os-Rh	0.681828778	-1.565428037	2.338563586	0.077074172	2.299152161	2.271870804	8.7	1.1	2.2	6.25	-1.5	1.49	1.13
Rh3Ir-Rh	0.780744387	-1.937743604	2.160611572	0.305730816	2.652006422	2.271870804	9.1	1.57	2.2	6.63	-2.11	1.5	1.08
Rh3Pt-Rh	0.87734515	-2.431053315	1.94243472	0.618626583	3.298480373	2.28	9	2.13	2.28	6.74	-2.25	1.53	1.04
Rh3Au-Rh	0.95492333	-3.576113556	1.675544014	1.417989283	5.552627659	2.304754831	9.23	2.31	2.54	6.01	-3.56	1.59	1.01
Pd3Sc-Pd	0.157960412	1.476718967	1.976244271	-1.407986253	4.602338456	2.096690385	6.56	0.19	1.36	3.84	1.5	1.81	1.24
Pd3Ti-Pd	0.225491049	0.467966837	1.893180393	-0.932552387	3.853602506	2.122914409	6.83	0.08	1.54	4.63	1.5	1.61	1.08
Pd3V-Pd	0.366253546	0.092911478	1.895696811	-0.635695427	3.138246281	2.13500636	6.75	0.53	1.63	4.88	1.06	1.49	0.98
Pd3Cr-Pd	0.473913098	0.412126684	2.211553948	-0.233571141	2.079776592	2.13890365	6.77	0.67	1.66	5.27	0.16	1.42	0.9
Pd3Mn-Pd	0.537482057	-0.40544211	2.450656523	0.050724453	1.592168827	2.124288913	7.43	0	1.55	5.45	0.07	1.43	0.86
Pd3Fe-Pd	0.647060118	-1.595334125	2.020154806	0.183582242	1.914268673	2.159859603	7.9	0.15	1.83	5.54	-0.92	1.41	0.8
Pd3Co-Pd	0.756049745	-1.455222253	1.611743229	0.182186264	2.738462578	2.165689534	7.88	0.66	1.88	5.76	-1.17	1.39	0.76
Pd3Ni-Pd	0.886092475	-1.192556029	1.190434344	0.175784215	5.129497394	2.169120853	7.64	1.16	1.91	5.77	-1.29	1.38	0.71
Pd3Cu-Pd	0.974579744	-1.533794079	0.96893223	0.372059196	7.334845067	2.167982503	7.73	1.24	1.9	5.3	-2.67	1.41	0.67
Pd3Y-Pd	0.173239318	1.801023683	2.380300848	-1.30172981	3.622280381	2.074036504	6.22	0.31	1.22	3.42	1.95	1.99	1.58
Pd3Zr-Pd	0.259569385	0.659388141	2.463025647	-0.846269476	2.714828665	2.09201877	6.63	0.43	1.33	4.35	1.95	1.77	1.41
Pd3Nb-Pd	0.367438793	-0.270133667	2.385520695	-0.539976684	2.35950158	2.131043972	6.76	0.9	1.6	4.69	1.41	1.62	1.28
Pd3Mo-Pd	0.481077612	-0.765736461	2.182169214	-0.357154239	2.415949399	2.195966891	7.09	0.75	2.16	5.09	0.35	1.55	1.2
Pd3Ru-Pd	0.689048437	-1.195972679	1.855484415	0.014074538	2.685426549	2.2	7.36	1.05	2.2	5.73	-1.41	1.48	1.05
Pd3Rh-Pd	0.794067335	-1.34512085	1.665274872	0.185825821	3.377779528	2.207872028	7.46	1.14	2.28	5.91	-1.73	1.49	0.99
Pd3Pd-Pd	0.917379148	-1.711710888	1.426114733	0.390813626	3.983479784	2.2	8.34	0.56	2.2	5.9	-1.83	1.52	0.94
Pd3Ag-Pd	0.980804688	-3.282090499	1.256079182	1.844661809	8.369892559	2.171381551	7.58	1.3	1.93	5.01	-4.3	1.59	0.89
Pd3La-Pd	0.197631335	1.567332666	2.452996458	-1.075921332	3.082458687	2.052672581	5.77	0.5	1.1	3.3	2	1.92	1.58
Pd3Ta-Pd	0.337721386	-0.005784926	2.561967633	-0.582365615	2.321839318	2.117334815	7.89	0.32	1.5	4.86	2	1.62	1.34
Pd3W-Pd	0.43939659	-0.65030265	2.418133919	-0.361595834	2.25359852	2.215499279	7.98	0.86	2.36	5.09	0.77	1.56	1.27
Pd3Re-Pd	0.567887225	-1.136610752	2.25393101	-0.188687959	2.265778883	2.167982503	7.88	0.15	1.9	5.88	-0.51	1.52	1.2
Pd3Os-Pd	0.68044064	-1.379937966	2.093194019	-0.013197875	2.415061018	2.2	8.7	1.1	2.2	6.25	-1.5	1.49	1.13
Pd3Ir-Pd	0.773902734	-1.537075355	1.900555912	0.196636011	2.837302492	2.2	9.1	1.57	2.2	6.63	-2.11	1.5	1.08
Pd3Pt-Pd	0.883176047	-1.864952187	1.694580118	0.464038167	3.412034098	2.207872028	9	2.13	2.28	6.74	-2.25	1.53	1.04
Pd3Au-Pd	0.967605317	-3.048443973	1.499930721	1.314827136	5.511430494	2.231843738	9.23	2.31	2.54	6.01	-3.56	1.59	1.01
Ag3Sc-Ag	0.151955763	0.788058346	1.702327701	-1.552735357	7.605006392	1.863611874	6.56	0.19	1.36	3.84	1.5	1.81	1.24
Ag3Ti-Ag	0.224258328	0.403895255	1.511891328	-0.923363463	7.78500684	1.886920706	6.83	0.08	1.54	4.63	1.5	1.61	1.08
Ag3V-Ag	0.384967861	0.907234139	1.916645589	-0.619731483	3.92820029	1.897668456	6.75	0.53	1.63	4.88	1.06	1.49	0.98
Ag3Cr-Ag	0.491382166	0.628624906	2.247799457	-0.218579873	2.406201687	1.901132503	6.77	0.67	1.66	5.27	0.16	1.42	0.9
Ag3Mn-Ag	0.532130521	-1.16612107	2.412076417	0.140424431	1.775472846	1.888142413	7.43	0	1.55	5.45	0.07	1.43	0.86
Ag3Fe-Ag	0.675514874	-1.11303134	1.839613531	0.110337862	2.688397136	1.919758889	7.9	0.15	1.83	5.54	-0.92	1.41	0.8
Ag3Co-Ag	0.777157042	-0.99809941	1.386168359	0.00035143	5.01798861	1.924940735	7.88	0.66	1.88	5.76	-1.17	1.39	0.76
Ag3Ni-Ag	0.894553531	-0.548562324	0.996822906	-0.570216537	13.71473628	1.927990612	7.64	1.16	1.91	5.77	-1.29	1.38	0.71
Ag3Cu-Ag	0.97998543	-1.996307163	0.873615814	0.360248139	16.43548735	1.926978807	7.73	1.24	1.9	5.3	-2.67	1.41	0.67
Ag3Y-Ag	0.167696552	1.025324101	2.119424548	-1.457371118	5.699972616	1.843476311	6.22	0.31	1.22	3.42	1.95	1.99	1.58
Ag3Zr-Ag	0.265263765	0.298752675	2.045077693	-1.119554001	5.080048251	1.859459579	6.63	0.43	1.33	4.35	1.95	1.77	1.41
Ag3Nb-Ag	0.409428686	0.156245208	2.004092362	-0.914008888	4.532119095	1.894146546	6.76	0.9	1.6	4.69	1.41	1.62	1.28
Ag3Mo-Ag	0.504019418	-0.081963866	2.056763089	-0.533140293	3.55386436	1.951852311	7.09	0.75	2.16	5.09	0.35	1.55	1.2
Ag3Ru-Ag	0.734293172	-0.781179869	1.609448471	-0.411787388	4.963333561	1.95543708	7.36	1.05	2.2	5.73	-1.41	1.48	1.05
Ag3Rh-Ag	0.836120838	-0.70434965	1.428635255	-0.391751077	6.619049532	1.962434014	7.46	1.14	2.28	5.91	-1.73	1.49	0.99
Ag3Pd-Ag	0.940097461	-1.571877106	1.292985488	-0.030804999	7.390745562	1.95543708	8.34	0.56	2.2	5.9	-1.83	1.52	0.94
Ag3Ag-Ag	0.979916623	-3.976142801	1.130814849	2.4147611	16.5596864	1.93	7.58	1.3	1.93	5.01	-4.3	1.59	0.89
Ag3La-Ag	0.18997479	0.857423647	2.097065586	-1.299064394	5.259338356	1.781052201	5.77	0.5	1.1	3.3	2	1.92	1.58
Ag3Ta-Ag	0.363214305	0.035092793	2.098980613	-0.940272238	4.461817139	1.881961367	7.89	0.32	1.5	4.86	2	1.62	1.34
Ag3W-Ag	0.47772678	0.009018195	2.116943843	-0.673128628	3.793766172	1.969213382	7.98	0.86	2.36	5.09	0.77	1.56	1.27
Ag3Re-Ag	0.588065457	-0.637272151	2.017606867	-0.438068375	3.589540658	1.926978807	7.88	0.15	1.9	5.88	-0.51	1.52	1.2
Ag3Os-Ag	0.717714109	-0.785454428	1.791374885	-0.467624808	4.351466688	1.95543708	8.7	1.1	2.2	6.25	-1.5	1.49	1.13
Ag3Ir-Ag	0.818602786	-0.803423397	1.62018139	-0.426001721	5.181202433	1.95543708	9.1	1.57	2.2	6.63	-2.11	1.5	1.08
Ag3Pt-Ag	0.915410222	-1.5712543	1.496804221	0.067147074	5.847507399	1.962434014	9	2.13	2.28	6.74	-2.25	1.53	1.04
Ag3Au-Ag	0.973829553	-3.489506066	1.328269232	1.501231427	9.875885317	1.98374091	9.23	2.31	2.54	6.01	-3.56	1.59	1.01
Os3Sc-Os	0.190230394	1.823350307	2.231467054	-1.521219914	4.872841579	2.096690385	6.56	0.19	1.36	3.84	1.5	1.81	1.24
Os3Ti-Os	0.253825064	1.090617193	2.136798123	-1.171851345	4.217195598	2.122914409	6.83	0.08	1.54	4.63	1.5	1.61	1.08
Os3V-Os	0.388466386	0.176465086	2.167964282	-0.86969956	3.64509796	2.13500636	6.75	0.53	1.63	4.88	1.06	1.49	0.98
Os3Cr-Os	0.49558768	-0.082758931	2.282066986	-0.52675391	2.919764932	2.13890365	6.77	0.67	1.66	5.27	0.16	1.42	0.9
Os3Mn-Os	0.556668798	-0.442354698	2.361191587	-0.11390459	2.115173434	2.124288913	7.43	0	1.55	5.45	0.07	1.43	0.86
Os3Fe-Os	0.667364936	-1.194246679	2.009993414	-0.00758211	2.561601909	2.159859603	7.9	0.15	1.83	5.54	-0.92	1.41	0.8
Os3Co-Os	0.776018192	-1.165555238	1.667730394	-0.22235436	4.079600466	2.165689534	7.88	0.66	1.88	5.76	-1.17	1.39	0.76
Os3Ni-Os	0.875110262	-1.49121822	1.46240021	-0.027108627	5.112953728	2.169120853	7.64	1.16	1.91	5.77	-1.29	1.38	0.71
Os3Cu-Os	0.962215387	-2.626698444	1.224483834	0.688552086	7.049039018	2.167982503	7.73	1.24	1.9	5.3	-2.67	1.41	0.67
Os3Y-Os	0.220680679	1.816539082	2.451463451	-1.233084997	3.818827729	2.022284595	6.22	0.31	1.22	3.42	1.95	1.99	1.58
Os3Zr-Os	0.314693906	1.067422145	2.752879077	-0.899262251	2.872367094	2.09201877	6.63	0.43	1.33	4.35	1.95	1.77	1.41
Os3Nb-Os	0.420477637	0.151299997	2.793785244	-0.634031323	2.483677061	2.131043972	6.76	0.9	1.6	4.69	1.41	1.62	1.28
Os3Mo-Os	0.520233198	-0.567711657	2.72103066	-0.397282009	2.350522109	2.195966891	7.09	0.75	2.16	5.09	0.35	1.55	1.2
Os3Ru-Os	0.725481742	-1.55542005	2.379055515	-0.020243037	2.607343237	2.2	7.36	1.05	2.2	5.73	-1.41	1.48	1.05
Os3Rh-Os	0.809047872	-1.951513386	2.208082872	0.198606466	2.895521712	2.207872028	7.46	1.14	2.28	5.91	-1.73	1.49	0.99
Os3Pd-Os	0.909237469	-2.784212831	1.9200482	0.569944205	3.653163438	2.2	8.34	0.56	2.2	5.9	-1.83	1.52	0.94
Os3Ag-Os	0.966910385	-4.202672955	1.592625472	1.65636378	7.009742432	2.171381551	7.58	1.3	1.93	5.01	-4.3	1.59	0.89
Os3La-Os	0.250631098	1.533382543	2.392932529	-1.040224433	3.371718418	1.992592061	5.77	0.5	1.1	3.3	2	1.92	1.58
Os3Ta-Os	0.403234329	0.34451787	2.961961215	-0.659881835	2.401711055	2.117334815	7.89	0.32	1.5	4.86	2	1.62	1.34
Os3W-Os	0.493040322	-0.415092772	2.91941996	-0.419824231	2.218436879	2.215499279	7.98	0.86	2.36	5.09	0.77	1.56	1.27
Os3Re-Os	0.610552338	-1.236899897	2.80090223	-0.225120756	2.116297327	2.167982503	7.88	0.15	1.9	5.88	-0.51	1.52	1.2
Os3Os-Os	0.693388829	-1.69827329	2.742351653	0.031077219	2.250690353	2.2	8.7	1.1	2.2	6.25	-1.5	1.49	1.13
Os3Ir-Os	0.786700928	-2.191213979	2.542866691	0.248953735	2.526871491	2.2	9.1	1.57	2.2	6.63	-2.11	1.5	1.08
Os3Pt-Os	0.875478771	-2.836970483	2.276422341	0.554608144	3.079784429	2.207872028	9	2.13	2.28	6.74	-2.25	1.53	1.04
Os3Au-Os	0.947392077	-4.116381754	1.948401687	1.251028476	4.904256062	2.231843738	9.23	2.31	2.54	6.01	-3.56	1.59	1.01
Ir3Sc-Ir	0.171684212	1.824342435	2.239150954	-1.683411886	5.399752189	2.096690385	6.56	0.19	1.36	3.84	1.5	1.81	1.24
Ir3Ti-Ir	0.235960352	0.895196513	2.069329922	-1.249566463	4.682085568	2.122914409	6.83	0.08	1.54	4.63	1.5	1.61	1.08
Ir3V-Ir	0.371097481	0.04516574	2.076645028	-1.012597332	4.084098608	2.13500636	6.75	0.53	1.63	4.88	1.06	1.49	0.98
Ir3Cr-Ir	0.479393929	0.030705541	2.315554563	-0.503823032	2.780003437	2.13890365	6.77	0.67	1.66	5.27	0.16	1.42	0.9
Ir3Mn-Ir	0.54284389	-0.544080331	2.419571242	-0.085703626	1.950421627	2.124288913	7.43	0	1.55	5.45	0.07	1.43	0.86
Ir3Fe-Ir	0.655132945	-1.349334773	2.035151232	-0.005128557	2.348430032	2.159859603	7.9	0.15	1.83	5.54	-0.92	1.41	0.8
Ir3Co-Ir	0.765903104	-1.29143502	1.655466538	-0.211759723	3.833250021	2.165689534	7.88	0.66	1.88	5.76	-1.17	1.39	0.76
Ir3Ni-Ir	0.869052108	-1.352595319	1.364036508	-0.307896474	5.873641765	2.169120853	7.64	1.16	1.91	5.77	-1.29	1.38	0.71
Ir3Cu-Ir	0.964394999	-2.342550263	1.162194996	0.314941543	7.177233141	2.167982503	7.73	1.24	1.9	5.3	-2.67	1.41	0.67
Ir3Y-Ir	0.197861375	2.03079287	2.646215044	-1.380482767	4.005568467	2.074036504	6.22	0.31	1.22	3.42	1.95	1.99	1.58
Ir3Zr-Ir	0.283384409	0.916427239	2.757846532	-1.041062149	3.108127704	2.09201877	6.63	0.43	1.33	4.35	1.95	1.77	1.41
Ir3Nb-Ir	0.39222471	-0.03500621	2.766454431	-0.730226104	2.645678611	2.131043972	6.76	0.9	1.6	4.69	1.41	1.62	1.28
Ir3Mo-Ir	0.499984064	-0.670167492	2.664929468	-0.505833616	2.517672509	2.195966891	7.09	0.75	2.16	5.09	0.35	1.55	1.2
Ir3Ru-Ir	0.71353588	-1.506078	2.248018045	-0.212618227	2.811349313	2.2	7.36	1.05	2.2	5.73	-1.41	1.48	1.05
Ir3Rh-Ir	0.797575823	-1.848363722	2.085603961	0.01441978	3.06925151	2.207872028	7.46	1.14	2.28	5.91	-1.73	1.49	0.99
Ir3Pd-Ir	0.905752468	-2.524345961	1.813235113	0.321779335	3.629678308	2.2	8.34	0.56	2.2	5.9	-1.83	1.52	0.94
Ir3Ag-Ir	0.969969432	-3.846762189	1.482837151	1.445051516	6.789540849	2.171381551	7.58	1.3	1.93	5.01	-4.3	1.59	0.89
Ir3La-Ir	0.225945714	1.684233237	2.624594824	-1.134290885	3.368072803	1.992592061	5.77	0.5	1.1	3.3	2	1.92	1.58
Ir3Ta-Ir	0.365773086	0.179433162	2.935640371	-0.760953937	2.563384677	2.117334815	7.89	0.32	1.5	4.86	2	1.62	1.34
Ir3W-Ir	0.465679282	-0.532030439	2.88807052	-0.50520194	2.342200727	2.215499279	7.98	0.86	2.36	5.09	0.77	1.56	1.27
Ir3Re-Ir	0.578809237	-1.183348697	2.767033808	-0.301110819	2.30358846	2.167982503	7.88	0.15	1.9	5.88	-0.51	1.52	1.2
Ir3Os-Ir	0.683649725	-1.665038776	2.590641948	-0.135500023	2.407333421	2.2	8.7	1.1	2.2	6.25	-1.5	1.49	1.13
Ir3Ir-Ir	0.7727709	-2.131776247	2.40127409	0.084322246	2.624811905	2.2	9.1	1.57	2.2	6.63	-2.11	1.5	1.08
Ir3Pt-Ir	0.871097445	-2.651529541	2.157507913	0.369986263	3.07292251	2.207872028	9	2.13	2.28	6.74	-2.25	1.53	1.04
Ir3Au-Ir	0.949012297	-3.766438466	1.829751837	1.060029137	4.685653444	2.231843738	9.23	2.31	2.54	6.01	-3.56	1.59	1.01
Pt3Sc-Pt	0.166817371	1.471532106	2.213458708	-1.585492663	5.106054943	2.165186214	6.56	0.19	1.36	3.84	1.5	1.81	1.24
Pt3Ti-Pt	0.226894701	0.551859753	2.009495419	-1.182858797	4.561576055	2.192266939	6.83	0.08	1.54	4.63	1.5	1.61	1.08
Pt3V-Pt	0.355662105	0.097634716	2.041286546	-0.874711076	3.697659381	2.204753916	6.75	0.53	1.63	4.88	1.06	1.49	0.98
Pt3Cr-Pt	0.47197453	0.308341787	2.343582596	-0.402089726	2.485276107	2.208778525	6.77	0.67	1.66	5.27	0.16	1.42	0.9
Pt3Mn-Pt	0.543546894	-0.509128633	1.60076063	-0.801770625	5.016999808	2.193686346	7.43	0	1.55	5.45	0.07	1.43	0.86
Pt3Fe-Pt	0.656931391	-1.631238182	2.094192745	0.073948891	2.061444478	2.230419078	7.9	0.15	1.83	5.54	-0.92	1.41	0.8
Pt3Co-Pt	0.762594488	-1.463272825	1.673280795	-0.024655804	3.05749247	2.236439464	7.88	0.66	1.88	5.76	-1.17	1.39	0.76
Pt3Ni-Pt	0.863410043	-1.137889952	1.289905697	-0.341189466	5.671203622	2.23998288	7.64	1.16	1.91	5.77	-1.29	1.38	0.71
Pt3Cu-Pt	0.972348095	-1.734254813	1.063412771	-0.128289968	7.538044527	2.238807342	7.73	1.24	1.9	5.3	-2.67	1.41	0.67
Pt3Y-Pt	0.188513401	1.741344655	2.684580618	-1.379401003	3.837039869	2.141792263	6.22	0.31	1.22	3.42	1.95	1.99	1.58
Pt3Zr-Pt	0.272545837	0.595479748	2.724450091	-0.973418118	2.962407631	2.160361984	6.63	0.43	1.33	4.35	1.95	1.77	1.41
Pt3Nb-Pt	0.384147064	-0.297888836	2.658368411	-0.659686637	2.551192933	2.200662082	6.76	0.9	1.6	4.69	1.41	1.62	1.28
Pt3Mo-Pt	0.489639176	-0.845440369	2.460271921	-0.490349507	2.543587799	2.267705939	7.09	0.75	2.16	5.09	0.35	1.55	1.2
Pt3Ru-Pt	0.706208563	-1.324994617	2.031843634	-0.253464076	2.951734623	2.271870804	7.36	1.05	2.2	5.73	-1.41	1.48	1.05
Pt3Rh-Pt	0.7963714	-1.453497457	1.843659045	-0.114879181	3.415985143	2.28	7.46	1.14	2.28	5.91	-1.73	1.49	0.99
Pt3Pd-Pt	0.914298352	-1.911175964	1.600246965	0.06600827	3.904680491	2.271870804	8.34	0.56	2.2	5.9	-1.83	1.52	0.94
Pt3Ag-Pt	0.978482896	-3.343962967	1.316852048	1.3243954	7.166026801	2.242317432	7.58	1.3	1.93	5.01	-4.3	1.59	0.89
Pt3La-Pt	0.20800154	1.482766063	2.655540448	-1.183171594	3.338486179	2.119730412	5.77	0.5	1.1	3.3	2	1.92	1.58
Pt3Ta-Pt	0.355939861	-0.062661876	2.857583058	-0.673202417	2.436775826	2.186505067	7.89	0.32	1.5	4.86	2	1.62	1.34
Pt3W-Pt	0.455443306	-0.765409434	2.717536342	-0.454318332	2.319150772	2.287876422	7.98	0.86	2.36	5.09	0.77	1.56	1.27
Pt3Re-Pt	0.577380001	-1.263343759	2.535983998	-0.308859108	2.337526102	2.238807342	7.88	0.15	1.9	5.88	-0.51	1.52	1.2
Pt3Os-Pt	0.674903262	-1.497437174	2.347526363	-0.196539838	2.487029348	2.271870804	8.7	1.1	2.2	6.25	-1.5	1.49	1.13
Pt3Ir-Pt	0.7758854	-1.725461902	2.137575153	-0.023229968	2.781591637	2.271870804	9.1	1.57	2.2	6.63	-2.11	1.5	1.08
Pt3Pt-Pt	0.877173576	-2.116333654	1.8980136	0.208080793	3.249208186	2.28	9	2.13	2.28	6.74	-2.25	1.53	1.04
Pt3Au-Pt	0.962718259	-3.204942492	1.624490561	0.900601264	4.784397438	2.304754831	9.23	2.31	2.54	6.01	-3.56	1.59	1.01
Au3Sc-Au	0.154307065	0.898938053	1.986393749	-1.569198405	6.275954295	2.386185684	6.56	0.19	1.36	3.84	1.5	1.81	1.24
Au3Ti-Au	0.221387453	0.343480431	1.726648525	-1.176762926	6.438284468	2.416030525	6.83	0.08	1.54	4.63	1.5	1.61	1.08
Au3V-Au	0.389049751	0.734924848	2.055125951	-0.756018242	3.972190445	2.429792042	6.75	0.53	1.63	4.88	1.06	1.49	0.98
Au3Cr-Au	0.489015564	0.669454165	2.370519099	-0.335209602	2.563794746	2.43422744	6.77	0.67	1.66	5.27	0.16	1.42	0.9
Au3Mn-Au	0.532222379	-1.017109567	2.497705386	0.062047874	1.743497697	2.417594811	7.43	0	1.55	5.45	0.07	1.43	0.86
Au3Fe-Au	0.671272214	-1.282419042	1.949152848	0.024772591	2.443035005	2.458076835	7.9	0.15	1.83	5.54	-0.92	1.41	0.8
Au3Co-Au	0.776620442	-1.120364419	1.511323891	-0.175003769	4.242093973	2.464711718	7.88	0.66	1.88	5.76	-1.17	1.39	0.76
Au3Ni-Au	0.892323751	-0.633367976	1.108356333	-0.894091481	10.62721648	2.468616808	7.64	1.16	1.91	5.77	-1.29	1.38	0.71
Au3Cu-Au	0.978969617	-1.919267627	0.961055328	-0.158080115	11.89255432	2.467321284	7.73	1.24	1.9	5.3	-2.67	1.41	0.67
Au3Y-Au	0.176125185	1.157765051	2.568163212	-1.390789211	4.47117746	2.360403924	6.22	0.31	1.22	3.42	1.95	1.99	1.58
Au3Zr-Au	0.26394987	0.302373837	2.472316928	-1.000062857	3.882803884	2.380869048	6.63	0.43	1.33	4.35	1.95	1.77	1.41
Au3Nb-Au	0.376443473	-0.12446305	2.313945495	-0.867304377	3.730900336	2.425282557	6.76	0.9	1.6	4.69	1.41	1.62	1.28
Au3Mo-Au	0.497995981	-0.1522452	2.270198341	-0.626442524	3.347973498	2.499169546	7.09	0.75	2.16	5.09	0.35	1.55	1.2
Au3Ru-Au	0.718498295	-0.938788543	1.829926538	-0.420094503	4.025452411	2.503759517	7.36	1.05	2.2	5.73	-1.41	1.48	1.05
Au3Rh-Au	0.820124211	-0.81004819	1.612191011	-0.443032421	5.216375334	2.512718456	7.46	1.14	2.28	5.91	-1.73	1.49	0.99
Au3Pd-Au	0.93363794	-1.578159467	1.450963019	-0.209796137	5.654523166	2.503759517	8.34	0.56	2.2	5.9	-1.83	1.52	0.94
Au3Ag-Au	0.982495186	-3.765208207	1.232774452	1.678397558	10.940592	2.471189647	7.58	1.3	1.93	5.01	-4.3	1.59	0.89
Au3La-Au	0.201417749	0.945652556	2.6970078	-1.273558835	3.914927073	2.336090232	5.77	0.5	1.1	3.3	2	1.92	1.58
Au3Ta-Au	0.350876802	-0.158029562	2.497538799	-0.820296709	3.381436671	2.409680543	7.89	0.32	1.5	4.86	2	1.62	1.34
Au3W-Au	0.466674226	-0.215497534	2.380784096	-0.679710045	3.328689303	2.52139882	7.98	0.86	2.36	5.09	0.77	1.56	1.27
Au3Re-Au	0.582856209	-0.737418376	2.291930008	-0.463306448	3.078491872	2.467321284	7.88	0.15	1.9	5.88	-0.51	1.52	1.2
Au3Os-Au	0.696675019	-0.943550191	2.056293075	-0.446542195	3.50232857	2.503759517	8.7	1.1	2.2	6.25	-1.5	1.49	1.13
Au3Ir-Au	0.809443687	-1.006986419	1.852508432	-0.378451391	4.059025802	2.503759517	9.1	1.57	2.2	6.63	-2.11	1.5	1.08
Au3Pt-Au	0.908056141	-1.643550195	1.685637878	-0.062505771	4.535691144	2.512718456	9	2.13	2.28	6.74	-2.25	1.53	1.04
Au3Au-Au	0.968676644	-3.329902816	1.45273455	1.015608714	6.881214689	2.54	9.23	2.31	2.54	6.01	-3.56	1.59	1.01
Co2Sc2-Co	0.223839945	1.52178001	2.217060619	-0.667525086	2.837287369	1.705973053	6.56	0.19	1.36	3.84	1.5	1.81	1.24
Co2V2-Co	0.392059861	0.209249633	2.084826571	-0.434808914	2.68789408	1.808243337	6.75	0.53	1.63	4.88	1.06	1.49	0.98
Co2Cr2-Co	0.495051175	-0.334497094	2.096387316	-0.226659681	2.485073658	1.826774024	6.77	0.67	1.66	5.27	0.16	1.42	0.9
Co2Fe2-Co	0.683451843	-1.03247602	1.989086706	0.221961555	2.471948517	1.864858229	7.9	0.15	1.83	5.54	-0.92	1.41	0.8
Co2Co2-Co	0.773852001	-1.191808411	1.525578912	0.196888822	3.986478676	1.88	7.88	0.66	1.88	5.76	-1.17	1.39	0.76
Co2Ni2-Co	0.875563723	-1.599110701	1.464936166	0.48184874	4.667118297	1.886880982	7.64	1.16	1.91	5.77	-1.29	1.38	0.71
Co2Cu2-Co	0.967970745	-2.627354277	1.193564966	1.14744518	7.501566527	1.885977793	7.73	1.24	1.9	5.3	-2.67	1.41	0.67
Co2Nb2-Co	0.434266587	0.122015066	2.773789526	-0.130479635	1.981120286	1.791209934	6.76	0.9	1.6	4.69	1.41	1.62	1.28
Co2Mo2-Co	0.526396295	-0.610156504	2.692750185	-0.045787735	1.937592812	1.959957345	7.09	0.75	2.16	5.09	0.35	1.55	1.2
Co2Ru2-Co	0.726972792	-1.64694588	2.332539279	0.16949207	2.31083522	1.970776154	7.36	1.05	2.2	5.73	-1.41	1.48	1.05
Co2Rh2-Co	0.811511205	-2.057147349	2.208543192	0.371137098	2.707610172	1.992007405	7.46	1.14	2.28	5.91	-1.73	1.49	0.99
Co2Pd2-Co	0.920437995	-2.819664248	1.922624423	0.644104466	3.465406918	1.970776154	8.34	0.56	2.2	5.9	-1.83	1.52	0.94
Co2Ta2-Co	0.423386266	-0.047651081	2.816123598	-0.176645211	1.954665954	1.756862901	7.89	0.32	1.5	4.86	2	1.62	1.34
Co2W2-Co	0.503542922	-0.490906826	2.989064794	-0.045326873	1.892032784	2.012723398	7.98	0.86	2.36	5.09	0.77	1.56	1.27
Co2Re2-Co	0.618366237	-1.353845395	2.863700752	0.054118365	1.872686731	1.884596618	7.88	0.15	1.9	5.88	-0.51	1.52	1.2
Co2Os2-Co	0.69844376	-1.949037042	2.767204034	0.192046543	2.081094479	1.95534798	8.7	1.1	2.2	6.25	-1.5	1.49	1.13
Co2Ir2-Co	0.789905767	-2.442086735	2.599852461	0.306171619	2.403766534	1.970776154	9.1	1.57	2.2	6.63	-2.11	1.5	1.08
Co2Pt2-Co	0.883745526	-3.058308471	2.394293973	0.497600834	2.930656189	1.992007405	9	2.13	2.28	6.74	-2.25	1.53	1.04
Ni2Sc2-Ni	0.201268875	1.532821086	2.281820607	-0.700644578	2.964443617	1.724983835	6.56	0.19	1.36	3.84	1.5	1.81	1.24
Ni2Ti2-Ni	0.262544288	0.921443744	2.085174754	-0.635819513	3.002530889	1.790521636	6.83	0.08	1.54	4.63	1.5	1.61	1.08
Ni2V2-Ni	0.383317672	0.139823242	1.998429916	-0.443852392	2.932233166	1.821292245	6.75	0.53	1.63	4.88	1.06	1.49	0.98
Ni2Cr2-Ni	0.494602049	-0.06010324	2.152729483	-0.164039576	2.407191234	1.831284348	6.77	0.67	1.66	5.27	0.16	1.42	0.9
Ni2Mn2-Ni	0.565898649	-0.553742251	1.707828878	-0.086388829	3.465397351	1.820129182	7.43	0	1.55	5.45	0.07	1.43	0.86
Ni2Fe2-Ni	0.675952378	-1.274641725	1.998862678	0.251583938	2.417744032	1.885639573	7.9	0.15	1.83	5.54	-0.92	1.41	0.8
Ni2Co2-Ni	0.764923055	-1.418681866	1.6859714	0.323367629	3.256470063	1.902455415	7.88	0.66	1.88	5.76	-1.17	1.39	0.76
Ni2Ni2-Ni	0.868536768	-1.411365263	1.373783112	0.459400788	4.938422317	1.91	7.64	1.16	1.91	5.77	-1.29	1.38	0.71
Ni2Cu2-Ni	0.969923124	-2.34183379	1.139855954	1.11300275	7.671440978	1.906994486	7.73	1.24	1.9	5.3	-2.67	1.41	0.67
Ni2Zr2-Ni	0.330050521	0.515181671	2.605177174	-0.322761426	2.158773521	1.713479249	6.63	0.43	1.33	4.35	1.95	1.77	1.41
Ni2Nb2-Ni	0.425403908	0.069760796	2.750563946	-0.161870509	2.049450033	1.811170567	6.76	0.9	1.6	4.69	1.41	1.62	1.28
Ni2Mo2-Ni	0.521971526	-0.659224974	2.616889257	-0.061442388	2.005499031	1.981798441	7.09	0.75	2.16	5.09	0.35	1.55	1.2
Ni2Ru2-Ni	0.726621116	-1.644421017	2.235685041	0.205505554	2.434274154	1.992737811	7.36	1.05	2.2	5.73	-1.41	1.48	1.05
Ni2Rh2-Ni	0.806413707	-1.9434743	2.106563722	0.397739116	2.854278821	2.014205656	7.46	1.14	2.28	5.91	-1.73	1.49	0.99
Ni2Pd2-Ni	0.921389493	-2.601318185	1.838893263	0.658194886	3.603757914	1.992737811	8.34	0.56	2.2	5.9	-1.83	1.52	0.94
Ni2Ta2-Ni	0.406355599	-0.0431787	2.843368063	-0.183358278	2.037021118	1.776440782	7.89	0.32	1.5	4.86	2	1.62	1.34
Ni2W2-Ni	0.496079185	-0.500413306	2.919157634	-0.056252119	1.924287365	2.035152501	7.98	0.86	2.36	5.09	0.77	1.56	1.27
Ni2Re2-Ni	0.602924259	-1.273583766	2.781118139	0.075051072	1.955456844	1.907495077	7.88	0.15	1.9	5.88	-0.51	1.52	1.2
Ni2Os2-Ni	0.698005231	-1.903223388	2.625813159	0.211649335	2.158495126	1.992737811	8.7	1.1	2.2	6.25	-1.5	1.49	1.13
Ni2Ir2-Ni	0.788274443	-2.353024317	2.477725159	0.338201555	2.518186756	1.992737811	9.1	1.57	2.2	6.63	-2.11	1.5	1.08
Ni2Pt2-Ni	0.880785266	-2.820817179	2.280716341	0.523002352	3.04392117	2.014205656	9	2.13	2.28	6.74	-2.25	1.53	1.04
Cu2Sc2-Cu	0.194363672	1.475453598	2.097485388	-0.83947002	3.822115881	1.718656928	6.56	0.19	1.36	3.84	1.5	1.81	1.24
Cu2Ti2-Cu	0.25370647	0.883064623	1.879321577	-0.714795238	3.930137389	1.78395435	6.83	0.08	1.54	4.63	1.5	1.61	1.08
Cu2V2-Cu	0.374822367	0.332857313	1.831730074	-0.550933284	3.734984725	1.814612098	6.75	0.53	1.63	4.88	1.06	1.49	0.98
Cu2Cr2-Cu	0.49573024	0.158373289	2.252072837	-0.144837734	2.362273786	1.824567552	6.77	0.67	1.66	5.27	0.16	1.42	0.9
Cu2Mn2-Cu	0.551616478	-0.559305841	2.323226501	0.107513943	1.993534678	1.787421716	7.43	0	1.55	5.45	0.07	1.43	0.86
Cu2Fe2-Cu	0.67434965	-1.173027716	1.873838989	0.198431254	2.59365414	1.878723413	7.9	0.15	1.83	5.54	-0.92	1.41	0.8
Cu2Co2-Cu	0.777808462	-1.137675415	1.517707469	0.198948255	3.882466795	1.893977762	7.88	0.66	1.88	5.76	-1.17	1.39	0.76
Cu2Ni2-Cu	0.882684492	-0.929421717	1.210082758	0.165988394	6.542834637	1.90299449	7.64	1.16	1.91	5.77	-1.29	1.38	0.71
Cu2Cu2-Cu	0.97221492	-2.383500599	1.049694885	1.120234242	9.923549026	1.9	7.73	1.24	1.9	5.3	-2.67	1.41	0.67
Cu2Zr2-Cu	0.322895492	0.690983657	2.41935335	-0.444628539	2.734005313	1.707194539	6.63	0.43	1.33	4.35	1.95	1.77	1.41
Cu2Nb2-Cu	0.421793597	0.129295005	2.480463388	-0.307834382	2.523439072	1.804527544	6.76	0.9	1.6	4.69	1.41	1.62	1.28
Cu2Mo2-Cu	0.521983572	-0.433159525	2.320972315	-0.228725685	2.519102524	1.974529588	7.09	0.75	2.16	5.09	0.35	1.55	1.2
Cu2Ru2-Cu	0.7368324	-1.239733496	2.004843126	0.033319144	2.876282565	1.985428835	7.36	1.05	2.2	5.73	-1.41	1.48	1.05
Cu2Rh2-Cu	0.815316553	-1.52285894	1.874381164	0.243335602	3.299046896	2.00681794	7.46	1.14	2.28	5.91	-1.73	1.49	0.99
Cu2Pd2-Cu	0.927591312	-2.146081286	1.663088153	0.523669043	3.989785621	1.985428835	8.34	0.56	2.2	5.9	-1.83	1.52	0.94
Cu2Ag2-Cu	0.977397115	-4.373946612	1.44013545	1.793921606	9.26561502	1.908950703	7.58	1.3	1.93	5.01	-4.3	1.59	0.89
Cu2Ta2-Cu	0.397789934	0.247659831	2.733509023	-0.287630135	2.432468062	1.769925141	7.89	0.32	1.5	4.86	2	1.62	1.34
Cu2Os2-Cu	0.708745031	-1.351055617	2.323007533	-0.004840084	2.462946364	1.985428835	8.7	1.1	2.2	6.25	-1.5	1.49	1.13
Cu2Ir2-Cu	0.793276911	-1.865964435	2.219942421	0.207694491	2.807875846	1.985428835	9.1	1.57	2.2	6.63	-2.11	1.5	1.08
Cu2Pt2-Cu	0.893779488	-2.379033648	2.056773489	0.437196954	3.296338509	2.00681794	9	2.13	2.28	6.74	-2.25	1.53	1.04
Cu2Au2-Cu	0.963536273	-4.114637723	1.830617541	1.074515738	5.409369085	2.072896583	9.23	2.31	2.54	6.01	-3.56	1.59	1.01
Ru2Sc2-Ru	0.211075547	1.586165964	2.107291665	-1.037179177	3.315751399	1.904397265	6.56	0.19	1.36	3.84	1.5	1.81	1.24
Ru2Ti2-Ru	0.260389628	1.031739456	1.908351042	-0.985324517	3.43941433	1.976751572	6.83	0.08	1.54	4.63	1.5	1.61	1.08
Ru2V2-Ru	0.381366992	0.27252889	1.88675313	-0.758789432	3.166006762	2.010722593	6.75	0.53	1.63	4.88	1.06	1.49	0.98
Ru2Cr2-Ru	0.49641549	-0.30948491	1.796084658	-0.59969172	3.154851458	2.021753963	6.77	0.67	1.66	5.27	0.16	1.42	0.9
Ru2Mn2-Ru	0.560132946	-0.486658272	1.664885901	-0.382504371	3.559137499	1.980593667	7.43	0	1.55	5.45	0.07	1.43	0.86
Ru2Fe2-Ru	0.670230341	-1.187637366	1.923409797	0.157243204	2.216084873	2.081762607	7.9	0.15	1.83	5.54	-0.92	1.41	0.8
Ru2Co2-Ru	0.765062826	-1.271220297	1.581024045	0.167362933	3.216025868	2.098665539	7.88	0.66	1.88	5.76	-1.17	1.39	0.76
Ru2Ni2-Ru	0.874444108	-1.266112032	1.258209468	0.222074992	5.32672668	2.108656732	7.64	1.16	1.91	5.77	-1.29	1.38	0.71
Ru2Cu2-Ru	0.965353428	-2.286146105	1.063581032	1.059286511	7.780349128	2.105338619	7.73	1.24	1.9	5.3	-2.67	1.41	0.67
Ru2Y2-Ru	0.286437372	1.332762209	2.48500264	-0.61313098	2.344066594	1.843333118	6.22	0.31	1.22	3.42	1.95	1.99	1.58
Ru2Zr2-Ru	0.348847528	0.886001817	2.55694986	-0.534233023	2.227794028	1.891696102	6.63	0.43	1.33	4.35	1.95	1.77	1.41
Ru2Nb2-Ru	0.421331021	0.294198749	2.55714191	-0.41496409	2.117636876	1.999548172	6.76	0.9	1.6	4.69	1.41	1.62	1.28
Ru2Mo2-Ru	0.507784299	-0.374539989	2.448762513	-0.248792517	2.107594549	2.18792284	7.09	0.75	2.16	5.09	0.35	1.55	1.2
Ru2Ru2-Ru	0.705136056	-1.408708804	2.077544437	0.107532314	2.469528899	2.2	7.36	1.05	2.2	5.73	-1.41	1.48	1.05
Ru2Rh2-Ru	0.807528081	-1.769154153	1.917316574	0.338319757	2.923707598	2.223700689	7.46	1.14	2.28	5.91	-1.73	1.49	0.99
Ru2Pd2-Ru	0.909621656	-2.375378398	1.648802776	0.679836005	3.732445054	2.2	8.34	0.56	2.2	5.9	-1.83	1.52	0.94
Ru2Ag2-Ru	0.972916435	-4.006155367	1.425962024	1.915258343	8.389584617	2.115256651	7.58	1.3	1.93	5.01	-4.3	1.59	0.89
Ru2La2-Ru	0.357943477	0.783247018	2.665058134	-0.796658474	4.537531435	1.786955272	5.77	0.5	1.1	3.3	2	1.92	1.58
Ru2Ta2-Ru	0.403951396	0.488821925	2.760002521	-0.419768062	2.094413668	1.961206185	7.89	0.32	1.5	4.86	2	1.62	1.34
Ru2W2-Ru	0.483419377	-0.201588196	2.709351883	-0.278396889	2.016649395	2.24682619	7.98	0.86	2.36	5.09	0.77	1.56	1.27
Ru2Re2-Ru	0.621007742	-1.238116151	2.443464241	-0.183207652	1.88117186	2.105338619	7.88	0.15	1.9	5.88	-0.51	1.52	1.2
Ru2Os2-Ru	0.680288213	-1.545024016	2.457827664	0.104959055	2.167504654	2.2	8.7	1.1	2.2	6.25	-1.5	1.49	1.13
Ru2Ir2-Ru	0.781421975	-2.01601493	2.27263197	0.313560695	2.517507265	2.2	9.1	1.57	2.2	6.63	-2.11	1.5	1.08
Ru2Pt2-Ru	0.876750246	-2.575504535	2.029067088	0.588206404	3.129720024	2.223700689	9	2.13	2.28	6.74	-2.25	1.53	1.04
Ru2Au2-Ru	0.954084562	-3.81579899	1.772434894	1.264284602	5.18857748	2.296920647	9.23	2.31	2.54	6.01	-3.56	1.59	1.01
Rh2Sc2-Rh	0.184496429	1.677418992	2.15515729	-1.055209952	3.59868685	1.952612501	6.56	0.19	1.36	3.84	1.5	1.81	1.24
Rh2Ti2-Rh	0.248433919	0.915596868	1.985699372	-0.895783113	3.627957664	2.026798663	6.83	0.08	1.54	4.63	1.5	1.61	1.08
Rh2V2-Rh	0.371637947	0.151665634	1.921287245	-0.698061295	3.36505071	2.061629758	6.75	0.53	1.63	4.88	1.06	1.49	0.98
Rh2Cr2-Rh	0.480599459	0.040087322	2.228671556	-0.215609538	2.235254078	2.072940417	6.77	0.67	1.66	5.27	0.16	1.42	0.9
Rh2Mn2-Rh	0.556377382	-0.486983074	1.606186772	-0.424233017	4.091059698	2.030738032	7.43	0	1.55	5.45	0.07	1.43	0.86
Rh2Fe2-Rh	0.659915491	-1.266832167	1.977832854	0.172674113	2.186865177	2.134468352	7.9	0.15	1.83	5.54	-0.92	1.41	0.8
Rh2Co2-Rh	0.770076012	-1.361864457	1.616459257	0.174711109	3.127948881	2.15179923	7.88	0.66	1.88	5.76	-1.17	1.39	0.76
Rh2Ni2-Rh	0.867817507	-1.218730985	1.249109889	0.136695384	5.493694067	2.162043378	7.64	1.16	1.91	5.77	-1.29	1.38	0.71
Rh2Cu2-Rh	0.96827537	-2.066776792	1.042354314	0.808104953	7.853340677	2.158641257	7.73	1.24	1.9	5.3	-2.67	1.41	0.67
Rh2Y2-Rh	0.241739839	1.359453255	2.549405698	-0.703578574	2.520651865	1.890002341	6.22	0.31	1.22	3.42	1.95	1.99	1.58
Rh2Zr2-Rh	0.308622965	0.952475289	2.640276388	-0.567144882	2.383022217	1.939589772	6.63	0.43	1.33	4.35	1.95	1.77	1.41
Rh2Nb2-Rh	0.402962763	0.205549147	2.585892203	-0.442017148	2.243886581	2.050172424	6.76	0.9	1.6	4.69	1.41	1.62	1.28
Rh2Mo2-Rh	0.49816224	-0.477414336	2.431785962	-0.296020679	2.226512394	2.243316333	7.09	0.75	2.16	5.09	0.35	1.55	1.2
Rh2Ru2-Rh	0.711325265	-1.413465792	2.039238218	0.047696842	2.654103829	2.25569926	7.36	1.05	2.2	5.73	-1.41	1.48	1.05
Rh2Rh2-Rh	0.790998876	-1.695848465	1.876662314	0.260372166	3.11956573	2.28	7.46	1.14	2.28	5.91	-1.73	1.49	0.99
Rh2Pd2-Rh	0.911175985	-2.190740608	1.609226896	0.556808458	3.835615018	2.25569926	8.34	0.56	2.2	5.9	-1.83	1.52	0.94
Rh2Ag2-Rh	0.974920728	-3.78683516	1.383336876	1.834306208	8.555618271	2.168810392	7.58	1.3	1.93	5.01	-4.3	1.59	0.89
Rh2La2-Rh	0.306753025	0.907339646	2.755531796	-0.807601144	4.243620325	1.83219713	5.77	0.5	1.1	3.3	2	1.92	1.58
Rh2Ta2-Rh	0.380421476	0.397929008	2.792382631	-0.453204874	2.188948447	2.010859701	7.89	0.32	1.5	4.86	2	1.62	1.34
Rh2W2-Rh	0.469869055	-0.324990642	2.704117273	-0.312834208	2.096480004	2.303710988	7.98	0.86	2.36	5.09	0.77	1.56	1.27
Rh2Re2-Rh	0.589446471	-1.064979189	2.566690471	-0.139619402	2.08784001	2.158641257	7.88	0.15	1.9	5.88	-0.51	1.52	1.2
Rh2Os2-Rh	0.680795257	-1.571496214	2.412264013	0.061849429	2.302629464	2.25569926	8.7	1.1	2.2	6.25	-1.5	1.49	1.13
Rh2Ir2-Rh	0.782179794	-1.995768101	2.224199906	0.264278254	2.651699816	2.25569926	9.1	1.57	2.2	6.63	-2.11	1.5	1.08
Rh2Pt2-Rh	0.875123677	-2.398249816	1.983908657	0.50559264	3.217977406	2.28	9	2.13	2.28	6.74	-2.25	1.53	1.04
Rh2Au2-Rh	0.957813363	-3.626857368	1.730798012	1.179225455	5.247692879	2.355073729	9.23	2.31	2.54	6.01	-3.56	1.59	1.01
Pd2Sc2-Pd	0.170507067	1.331860567	2.078699817	-1.099478349	3.953810717	1.904397265	6.56	0.19	1.36	3.84	1.5	1.81	1.24
Pd2Ti2-Pd	0.234052157	0.699340638	1.876753369	-0.916996062	4.061943904	1.976751572	6.83	0.08	1.54	4.63	1.5	1.61	1.08
Pd2V2-Pd	0.357676821	0.253657129	1.94518643	-0.556778742	3.104530684	2.010722593	6.75	0.53	1.63	4.88	1.06	1.49	0.98
Pd2Cr2-Pd	0.46812578	0.395064022	2.252605392	-0.180498796	2.108786726	2.021753963	6.77	0.67	1.66	5.27	0.16	1.42	0.9
Pd2Mn2-Pd	0.537780681	-0.422567619	1.464002954	-0.450592603	4.773230146	1.980593667	7.43	0	1.55	5.45	0.07	1.43	0.86
Pd2Fe2-Pd	0.657352936	-1.424591657	1.966759306	0.176919088	2.062890936	2.081762607	7.9	0.15	1.83	5.54	-0.92	1.41	0.8
Pd2Co2-Pd	0.766029375	-0.709387501	1.203249864	-0.294879632	5.782829997	2.098665539	7.88	0.66	1.88	5.76	-1.17	1.39	0.76
Pd2Ni2-Pd	0.872260153	-1.150263111	1.190657373	0.181661431	5.367715934	2.108656732	7.64	1.16	1.91	5.77	-1.29	1.38	0.71
Pd2Cu2-Pd	0.97494843	-1.589101934	0.947286887	0.541536891	8.034724349	2.105338619	7.73	1.24	1.9	5.3	-2.67	1.41	0.67
Pd2Y2-Pd	0.202020981	1.182333741	2.489916283	-0.823458948	2.896523001	1.843333118	6.22	0.31	1.22	3.42	1.95	1.99	1.58
Pd2Zr2-Pd	0.285440028	0.840979945	2.549145731	-0.634669965	2.651251359	1.891696102	6.63	0.43	1.33	4.35	1.95	1.77	1.41
Pd2Nb2-Pd	0.397245722	0.072787298	2.401634147	-0.512468146	2.483792026	1.999548172	6.76	0.9	1.6	4.69	1.41	1.62	1.28
Pd2Mo2-Pd	0.491718338	-0.478149255	2.208114247	-0.365979807	2.490831747	2.18792284	7.09	0.75	2.16	5.09	0.35	1.55	1.2
Pd2Ru2-Pd	0.706980377	-1.17895074	1.836990587	-0.001344918	2.815852898	2.2	7.36	1.05	2.2	5.73	-1.41	1.48	1.05
Pd2Rh2-Pd	0.799628248	-1.385780565	1.682009081	0.226756104	3.39233303	2.223700689	7.46	1.14	2.28	5.91	-1.73	1.49	0.99
Pd2Pd2-Pd	0.917379148	-1.711710888	1.426114733	0.390813626	3.983479784	2.2	8.34	0.56	2.2	5.9	-1.83	1.52	0.94
Pd2Ag2-Pd	0.981163312	-3.405764138	1.241038831	1.839003422	9.073985046	2.115256651	7.58	1.3	1.93	5.01	-4.3	1.59	0.89
Pd2La2-Pd	0.264388038	0.838012933	2.709737133	-0.77303082	3.343581204	1.786955272	5.77	0.5	1.1	3.3	2	1.92	1.58
Pd2Ta2-Pd	0.363558626	0.323042449	2.625323602	-0.53007206	2.40068553	1.961206185	7.89	0.32	1.5	4.86	2	1.62	1.34
Pd2W2-Pd	0.460945523	-0.361352916	2.466145066	-0.389765939	2.329121153	2.24682619	7.98	0.86	2.36	5.09	0.77	1.56	1.27
Pd2Re2-Pd	0.578513721	-0.957929599	2.312017667	-0.213447673	2.342625754	2.105338619	7.88	0.15	1.9	5.88	-0.51	1.52	1.2
Pd2Os2-Pd	0.679788957	-1.358609417	2.14255856	-0.025259014	2.508068952	2.2	8.7	1.1	2.2	6.25	-1.5	1.49	1.13
Pd2Ir2-Pd	0.775365548	-1.610952282	1.975694116	0.186263166	2.84429988	2.2	9.1	1.57	2.2	6.63	-2.11	1.5	1.08
Pd2Pt2-Pd	0.883151498	-1.922132591	1.753614265	0.402536208	3.383668425	2.223700689	9	2.13	2.28	6.74	-2.25	1.53	1.04
Pd2Au2-Pd	0.967929876	-3.130751075	1.548879439	1.118932887	5.326878388	2.296920647	9.23	2.31	2.54	6.01	-3.56	1.59	1.01
Ag2Sc2-Ag	0.175280985	1.202874263	1.770160542	-1.338089276	6.348977759	1.737607926	6.56	0.19	1.36	3.84	1.5	1.81	1.24
Ag2Ti2-Ag	0.240219584	0.672176501	1.517756843	-0.944198382	6.80367839	1.803625358	6.83	0.08	1.54	4.63	1.5	1.61	1.08
Ag2V2-Ag	0.37891811	0.760422148	1.922069497	-0.478500032	3.50286479	1.834621157	6.75	0.53	1.63	4.88	1.06	1.49	0.98
Ag2Cr2-Ag	0.489924746	0.569653626	2.264021202	-0.148427953	2.285982131	1.844686386	6.77	0.67	1.66	5.27	0.16	1.42	0.9
Ag2Mn2-Ag	0.54228277	-0.89709944	2.347535177	0.137359614	1.814979741	1.807130958	7.43	0	1.55	5.45	0.07	1.43	0.86
Ag2Fe2-Ag	0.671197735	-1.174987701	1.792101935	0.161842409	2.670730287	1.899439404	7.9	0.15	1.83	5.54	-0.92	1.41	0.8
Ag2Co2-Ag	0.768123411	-1.058566169	1.399125734	0.088690112	4.736288347	1.914861957	7.88	0.66	1.88	5.76	-1.17	1.39	0.76
Ag2Ni2-Ag	0.894390586	-0.677138219	1.003122357	-0.229012035	12.3114472	1.92397811	7.64	1.16	1.91	5.77	-1.29	1.38	0.71
Ag2Cu2-Ag	0.979770286	-1.992381475	0.869031735	0.527095998	16.6282209	1.9209506	7.73	1.24	1.9	5.3	-2.67	1.41	0.67
Ag2Y2-Ag	0.21083549	1.383997141	2.298758927	-0.934075516	4.185017782	1.681891848	6.22	0.31	1.22	3.42	1.95	1.99	1.58
Ag2Zr2-Ag	0.29477953	0.799576413	2.177088072	-0.850644692	4.058633938	1.726019145	6.63	0.43	1.33	4.35	1.95	1.77	1.41
Ag2Nb2-Ag	0.406532428	0.124245462	1.99461561	-0.749259997	4.131377092	1.824425405	6.76	0.9	1.6	4.69	1.41	1.62	1.28
Ag2Mo2-Ag	0.515441677	-0.11550897	1.899713383	-0.551458837	3.923211373	1.996301999	7.09	0.75	2.16	5.09	0.35	1.55	1.2
Ag2Ru2-Ag	0.723511967	-0.856219344	1.62905602	-0.2286981	4.300388899	2.007321427	7.36	1.05	2.2	5.73	-1.41	1.48	1.05
Ag2Rh2-Ag	0.824157149	-0.918143677	1.431537303	-0.119545221	5.703309963	2.028946383	7.46	1.14	2.28	5.91	-1.73	1.49	0.99
Ag2Pd2-Ag	0.937049856	-1.416585844	1.267835093	-0.033215349	6.74741979	2.007321427	8.34	0.56	2.2	5.9	-1.83	1.52	0.94
Ag2Ag2-Ag	0.979916623	-3.976142801	1.130814849	2.4147611	16.5596864	1.93	7.58	1.3	1.93	5.01	-4.3	1.59	0.89
Ag2La2-Ag	0.252596902	1.115240126	2.288690569	-0.838138156	4.14387078	1.600180969	5.77	0.5	1.1	3.3	2	1.92	1.58
Ag2Ta2-Ag	0.375001343	0.270603577	2.169728128	-0.742089418	3.78104257	1.789441454	7.89	0.32	1.5	4.86	2	1.62	1.34
Ag2W2-Ag	0.478392144	-0.087127296	2.058939722	-0.602698141	3.723139319	2.050046524	7.98	0.86	2.36	5.09	0.77	1.56	1.27
Ag2Re2-Ag	0.599702109	-0.540912176	1.945460265	-0.425659423	3.727852418	1.9209506	7.88	0.15	1.9	5.88	-0.51	1.52	1.2
Ag2Os2-Ag	0.707443015	-0.799363266	1.777677512	-0.363459862	4.125650781	2.007321427	8.7	1.1	2.2	6.25	-1.5	1.49	1.13
Ag2Ir2-Ag	0.802828472	-1.058126514	1.662870201	-0.136824926	4.493950541	2.007321427	9.1	1.57	2.2	6.63	-2.11	1.5	1.08
Ag2Pt2-Ag	0.906740168	-1.474383162	1.527013929	0.124643902	5.119888327	2.028946383	9	2.13	2.28	6.74	-2.25	1.53	1.04
Ag2Au2-Ag	0.973200527	-3.480287788	1.365794275	1.392417271	9.010583796	2.09575365	9.23	2.31	2.54	6.01	-3.56	1.59	1.01
Os2Sc2-Os	0.222716981	1.573549867	2.282913015	-1.12266932	3.764620776	1.904397265	6.56	0.19	1.36	3.84	1.5	1.81	1.24
Os2Ti2-Os	0.268879547	1.053073547	2.04647113	-1.050047143	3.872750157	1.976751572	6.83	0.08	1.54	4.63	1.5	1.61	1.08
Os2V2-Os	0.389006264	0.311003169	2.08748504	-0.838862725	3.601934449	2.010722593	6.75	0.53	1.63	4.88	1.06	1.49	0.98
Os2Cr2-Os	0.496644301	-0.095164519	2.202525459	-0.462083786	2.882677949	2.021753963	6.77	0.67	1.66	5.27	0.16	1.42	0.9
Os2Mn2-Os	0.56193723	-0.458742381	1.856365367	-0.526236108	3.860525507	1.980593667	7.43	0	1.55	5.45	0.07	1.43	0.86
Os2Fe2-Os	0.673625503	-1.125979481	1.970163717	0.020651813	2.626499691	2.081762607	7.9	0.15	1.83	5.54	-0.92	1.41	0.8
Os2Co2-Os	0.774008606	-1.213753029	1.653959466	-0.105472933	3.960077414	2.098665539	7.88	0.66	1.88	5.76	-1.17	1.39	0.76
Os2Ni2-Os	0.875936093	-1.42532959	1.422593063	0.019276934	5.366837878	2.108656732	7.64	1.16	1.91	5.77	-1.29	1.38	0.71
Os2Cu2-Os	0.964753155	-2.539558658	1.177950906	0.786647754	7.64703734	2.105338619	7.73	1.24	1.9	5.3	-2.67	1.41	0.67
Os2Y2-Os	0.306342353	1.190339809	2.626838706	-0.687060625	2.717657607	1.843333118	6.22	0.31	1.22	3.42	1.95	1.99	1.58
Os2Zr2-Os	0.361465123	0.852230002	2.744091418	-0.608518325	2.49022561	1.891696102	6.63	0.43	1.33	4.35	1.95	1.77	1.41
Os2Nb2-Os	0.434512602	0.21384247	2.761137114	-0.494844211	2.368580859	1.999548172	6.76	0.9	1.6	4.69	1.41	1.62	1.28
Os2Mo2-Os	0.52289348	-0.459704753	2.705214033	-0.328919678	2.31599412	2.18792284	7.09	0.75	2.16	5.09	0.35	1.55	1.2
Os2Ru2-Os	0.724331469	-1.54347883	2.329258642	-0.008525457	2.595798038	2.2	7.36	1.05	2.2	5.73	-1.41	1.48	1.05
Os2Rh2-Os	0.8099041	-1.93227834	2.143953899	0.206135802	2.934739541	2.223700689	7.46	1.14	2.28	5.91	-1.73	1.49	0.99
Os2Pd2-Os	0.910630688	-2.691045212	1.859128236	0.541060069	3.679517241	2.2	8.34	0.56	2.2	5.9	-1.83	1.52	0.94
Os2Ag2-Os	0.970158425	-4.214789325	1.564685627	1.666282218	7.464440013	2.115256651	7.58	1.3	1.93	5.01	-4.3	1.59	0.89
Os2La2-Os	0.374442318	0.635708562	2.76793149	-0.819433446	4.383847465	1.634593718	5.77	0.5	1.1	3.3	2	1.92	1.58
Os2Ta2-Os	0.419567774	0.370725994	2.955864369	-0.489886528	2.29163962	1.961206185	7.89	0.32	1.5	4.86	2	1.62	1.34
Os2W2-Os	0.503173911	-0.357225043	2.937792992	-0.339004169	2.181821853	2.24682619	7.98	0.86	2.36	5.09	0.77	1.56	1.27
Os2Re2-Os	0.640882261	-1.417426998	2.697833679	-0.230636963	2.104837436	2.105338619	7.88	0.15	1.9	5.88	-0.51	1.52	1.2
Os2Os2-Os	0.693388829	-1.69827329	2.742351653	0.031077219	2.250690353	2.2	8.7	1.1	2.2	6.25	-1.5	1.49	1.13
Os2Ir2-Os	0.787526119	-2.206996314	2.526550486	0.223914178	2.522997916	2.2	9.1	1.57	2.2	6.63	-2.11	1.5	1.08
Os2Pt2-Os	0.876079167	-2.839465254	2.24926782	0.490787865	3.054660112	2.223700689	9	2.13	2.28	6.74	-2.25	1.53	1.04
Os2Au2-Os	0.951611518	-4.094207038	1.936667219	1.1275289	4.849864094	2.296920647	9.23	2.31	2.54	6.01	-3.56	1.59	1.01
Ir2Sc2-Ir	0.189007921	1.711632683	2.304941115	-1.256506753	4.278889099	1.904397265	6.56	0.19	1.36	3.84	1.5	1.81	1.24
Ir2Ti2-Ir	0.246632443	0.994660838	2.08065976	-1.083985382	4.261380407	1.976751572	6.83	0.08	1.54	4.63	1.5	1.61	1.08
Ir2V2-Ir	0.374850587	0.167122933	2.029844633	-0.950600991	4.071110025	2.010722593	6.75	0.53	1.63	4.88	1.06	1.49	0.98
Ir2Cr2-Ir	0.480232194	-0.001374097	2.295822132	-0.414626126	2.71236209	2.021753963	6.77	0.67	1.66	5.27	0.16	1.42	0.9
Ir2Mn2-Ir	0.566790446	-0.491903544	1.730375624	-0.677640612	4.609898325	1.980593667	7.43	0	1.55	5.45	0.07	1.43	0.86
Ir2Fe2-Ir	0.667405526	-1.296347315	2.010337783	0.036980247	2.430008537	2.081762607	7.9	0.15	1.83	5.54	-0.92	1.41	0.8
Ir2Co2-Ir	0.767879275	-1.294550524	1.654163384	-0.110748931	3.733779854	2.098665539	7.88	0.66	1.88	5.76	-1.17	1.39	0.76
Ir2Ni2-Ir	0.871393856	-1.25906648	1.328568572	-0.253863139	6.209248565	2.108656732	7.64	1.16	1.91	5.77	-1.29	1.38	0.71
Ir2Cu2-Ir	0.966063658	-2.234735409	1.126402162	0.392208334	7.757738794	2.105338619	7.73	1.24	1.9	5.3	-2.67	1.41	0.67
Ir2Y2-Ir	0.253033731	1.373122842	2.768431488	-0.843969212	2.907595624	1.843333118	6.22	0.31	1.22	3.42	1.95	1.99	1.58
Ir2Zr2-Ir	0.313234559	0.932630352	2.820295859	-0.73007375	2.718753949	1.891696102	6.63	0.43	1.33	4.35	1.95	1.77	1.41
Ir2Nb2-Ir	0.407655655	0.17089162	2.764568047	-0.594147994	2.56113782	1.999548172	6.76	0.9	1.6	4.69	1.41	1.62	1.28
Ir2Mo2-Ir	0.505200886	-0.513653826	2.633219171	-0.442763933	2.501746853	2.18792284	7.09	0.75	2.16	5.09	0.35	1.55	1.2
Ir2Ru2-Ir	0.717793932	-1.506713951	2.214435562	-0.166843908	2.800929363	2.2	7.36	1.05	2.2	5.73	-1.41	1.48	1.05
Ir2Rh2-Ir	0.800828031	-1.817876063	2.038963549	0.041498349	3.131510265	2.223700689	7.46	1.14	2.28	5.91	-1.73	1.49	0.99
Ir2Pd2-Ir	0.909442573	-2.394382573	1.750100957	0.312152383	3.731970431	2.2	8.34	0.56	2.2	5.9	-1.83	1.52	0.94
Ir2Ag2-Ir	0.973226143	-3.883082871	1.465298567	1.500593957	7.385651057	2.115256651	7.58	1.3	1.93	5.01	-4.3	1.59	0.89
Ir2La2-Ir	0.312885527	0.906402107	2.909129101	-0.83949566	3.957300332	1.786955272	5.77	0.5	1.1	3.3	2	1.92	1.58
Ir2Ta2-Ir	0.387098003	0.319622146	2.966107524	-0.597401346	2.449114152	1.961206185	7.89	0.32	1.5	4.86	2	1.62	1.34
Ir2W2-Ir	0.474476708	-0.370590206	2.896650496	-0.440986815	2.326570239	2.24682619	7.98	0.86	2.36	5.09	0.77	1.56	1.27
Ir2Re2-Ir	0.593730654	-1.125277288	2.771737271	-0.286032412	2.258394395	2.105338619	7.88	0.15	1.9	5.88	-0.51	1.52	1.2
Ir2Os2-Ir	0.681298135	-1.632564292	2.606332567	-0.109235291	2.388037534	2.2	8.7	1.1	2.2	6.25	-1.5	1.49	1.13
Ir2Ir2-Ir	0.7727709	-2.131776247	2.40127409	0.084322246	2.624811905	2.2	9.1	1.57	2.2	6.63	-2.11	1.5	1.08
Ir2Pt2-Ir	0.874863605	-2.613794115	2.132772329	0.333022057	3.094742799	2.223700689	9	2.13	2.28	6.74	-2.25	1.53	1.04
Ir2Au2-Ir	0.955399446	-3.766398668	1.827506443	0.9656501	4.716076743	2.296920647	9.23	2.31	2.54	6.01	-3.56	1.59	1.01
Pt2Sc2-Pt	0.176860896	1.433327797	2.27956683	-1.292087495	4.418481903	1.952612501	6.56	0.19	1.36	3.84	1.5	1.81	1.24
Pt2Ti2-Pt	0.24224506	0.686421593	2.001262951	-1.120458236	4.552206957	2.026798663	6.83	0.08	1.54	4.63	1.5	1.61	1.08
Pt2V2-Pt	0.363940505	0.128140123	2.043524843	-0.81973935	3.699127852	2.061629758	6.75	0.53	1.63	4.88	1.06	1.49	0.98
Pt2Cr2-Pt	0.474154125	0.260521411	2.352259139	-0.329219583	2.440932534	2.072940417	6.77	0.67	1.66	5.27	0.16	1.42	0.9
Pt2Mn2-Pt	0.552556719	-0.507949565	1.598832026	-0.77014085	5.091976871	2.030738032	7.43	0	1.55	5.45	0.07	1.43	0.86
Pt2Fe2-Pt	0.664745172	-1.464497427	2.039907476	0.076416426	2.18969872	2.134468352	7.9	0.15	1.83	5.54	-0.92	1.41	0.8
Pt2Co2-Pt	0.768021719	-1.46446737	1.660969569	-0.01156635	3.201637337	2.15179923	7.88	0.66	1.88	5.76	-1.17	1.39	0.76
Pt2Ni2-Pt	0.867736271	-1.162540883	1.268052899	-0.244129191	5.870374096	2.162043378	7.64	1.16	1.91	5.77	-1.29	1.38	0.71
Pt2Cu2-Pt	0.973053091	-1.766175943	1.039133365	0.021971807	8.040023826	2.158641257	7.73	1.24	1.9	5.3	-2.67	1.41	0.67
Pt2Y2-Pt	0.219248282	1.169090416	2.780514604	-0.920607605	3.025339544	1.890002341	6.22	0.31	1.22	3.42	1.95	1.99	1.58
Pt2Zr2-Pt	0.294942693	0.76122346	2.771596091	-0.779293484	2.839367822	1.939589772	6.63	0.43	1.33	4.35	1.95	1.77	1.41
Pt2Nb2-Pt	0.399724292	-0.000739026	2.655609702	-0.636615125	2.651337863	2.050172424	6.76	0.9	1.6	4.69	1.41	1.62	1.28
Pt2Mo2-Pt	0.496563526	-0.587901935	2.458655185	-0.49275558	2.620199665	2.243316333	7.09	0.75	2.16	5.09	0.35	1.55	1.2
Pt2Ru2-Pt	0.711387038	-1.331265841	2.010550506	-0.225163067	2.995023438	2.25569926	7.36	1.05	2.2	5.73	-1.41	1.48	1.05
Pt2Rh2-Pt	0.795502556	-1.474455698	1.825784606	-0.050606883	3.448333374	2.28	7.46	1.14	2.28	5.91	-1.73	1.49	0.99
Pt2Pd2-Pt	0.916069774	-1.875797159	1.561581089	0.112812681	3.992447074	2.25569926	8.34	0.56	2.2	5.9	-1.83	1.52	0.94
Pt2Ag2-Pt	0.978920733	-3.481656359	1.316016381	1.440250022	7.806022831	2.168810392	7.58	1.3	1.93	5.01	-4.3	1.59	0.89
Pt2La2-Pt	0.271405459	0.857891193	2.910520172	-0.812389218	3.193885876	1.83219713	5.77	0.5	1.1	3.3	2	1.92	1.58
Pt2Ta2-Pt	0.374513627	0.201911205	2.886420668	-0.627292034	2.510608137	2.010859701	7.89	0.32	1.5	4.86	2	1.62	1.34
Pt2W2-Pt	0.469581457	-0.492199926	2.722051894	-0.474526327	2.403792229	2.303710988	7.98	0.86	2.36	5.09	0.77	1.56	1.27
Pt2Re2-Pt	0.582532848	-1.10421892	2.564814334	-0.309652284	2.399782039	2.158641257	7.88	0.15	1.9	5.88	-0.51	1.52	1.2
Pt2Os2-Pt	0.680495973	-1.52585045	2.367143334	-0.160039874	2.511793711	2.25569926	8.7	1.1	2.2	6.25	-1.5	1.49	1.13
Pt2Ir2-Pt	0.772785748	-1.771558885	2.160834262	0.002887039	2.773630807	2.25569926	9.1	1.57	2.2	6.63	-2.11	1.5	1.08
Pt2Pt2-Pt	0.877173576	-2.116333654	1.8980136	0.208080793	3.249208186	2.28	9	2.13	2.28	6.74	-2.25	1.53	1.04
Pt2Au2-Pt	0.96459469	-3.227738989	1.628253671	0.861399577	4.851274262	2.355073729	9.23	2.31	2.54	6.01	-3.56	1.59	1.01
Au2Sc2-Au	0.171264269	1.211009004	2.022403119	-1.458391448	5.834646075	2.105936511	6.56	0.19	1.36	3.84	1.5	1.81	1.24
Au2Ti2-Au	0.23574782	0.660123864	1.710378865	-1.18597524	6.342836921	2.185947956	6.83	0.08	1.54	4.63	1.5	1.61	1.08
Au2V2-Au	0.364719923	0.660909338	2.01480864	-0.665635365	3.743217911	2.223514075	6.75	0.53	1.63	4.88	1.06	1.49	0.98
Au2Cr2-Au	0.486966098	0.607555414	2.353816258	-0.279562981	2.463527868	2.235712876	6.77	0.67	1.66	5.27	0.16	1.42	0.9
Au2Mn2-Au	0.537766347	-0.84610201	2.447635586	0.05613542	1.825791433	2.190196654	7.43	0	1.55	5.45	0.07	1.43	0.86
Au2Fe2-Au	0.65963967	-1.272081352	1.890370821	0.061882417	2.499056183	2.302072138	7.9	0.15	1.83	5.54	-0.92	1.41	0.8
Au2Co2-Au	0.778386394	-1.219205691	1.51701369	-0.086998696	4.170300069	2.320763879	7.88	0.66	1.88	5.76	-1.17	1.39	0.76
Au2Ni2-Au	0.887771024	-0.748240947	1.113445521	-0.603117247	9.849295156	2.331812423	7.64	1.16	1.91	5.77	-1.29	1.38	0.71
Au2Cu2-Au	0.978314274	-1.935018337	0.976794105	-0.094199197	11.69930818	2.328143159	7.73	1.24	1.9	5.3	-2.67	1.41	0.67
Au2Y2-Au	0.210157017	1.273646592	2.628214909	-1.059156452	3.84622099	2.038410045	6.22	0.31	1.22	3.42	1.95	1.99	1.58
Au2Zr2-Au	0.289873876	0.78067355	2.465875039	-0.95369342	3.678480213	2.091891205	6.63	0.43	1.33	4.35	1.95	1.77	1.41
Au2Nb2-Au	0.401306988	0.024723196	2.291404275	-0.817846447	3.635916871	2.211157083	6.76	0.9	1.6	4.69	1.41	1.62	1.28
Au2Mo2-Au	0.511509583	-0.304243422	2.118619671	-0.672499254	3.636460839	2.419467134	7.09	0.75	2.16	5.09	0.35	1.55	1.2
Au2Ru2-Au	0.706468687	-0.94712053	1.805355483	-0.327939438	3.798989862	2.4328224	7.36	1.05	2.2	5.73	-1.41	1.48	1.05
Au2Rh2-Au	0.809117932	-0.995855982	1.583548463	-0.243016271	4.851496441	2.459031294	7.46	1.14	2.28	5.91	-1.73	1.49	0.99
Au2Pd2-Au	0.92771464	-1.407902895	1.394085829	-0.200461465	5.594370289	2.4328224	8.34	0.56	2.2	5.9	-1.83	1.52	0.94
Au2Ag2-Au	0.982664187	-3.822701562	1.213701156	1.809321836	11.82619066	2.339110801	7.58	1.3	1.93	5.01	-4.3	1.59	0.89
Au2La2-Au	0.258750855	0.909312898	2.716098197	-0.952311159	3.478542527	1.976065824	5.77	0.5	1.1	3.3	2	1.92	1.58
Au2Ta2-Au	0.372595585	0.184755954	2.489617812	-0.813256827	3.348545074	2.168757427	7.89	0.32	1.5	4.86	2	1.62	1.34
Au2W2-Au	0.468799872	-0.276290455	2.331917076	-0.655385064	3.351724626	2.484604129	7.98	0.86	2.36	5.09	0.77	1.56	1.27
Au2Re2-Au	0.597775344	-0.72316809	2.196622482	-0.510542942	3.296290336	2.328143159	7.88	0.15	1.9	5.88	-0.51	1.52	1.2
Au2Os2-Au	0.694830477	-1.006962155	2.020161986	-0.401856996	3.46840556	2.4328224	8.7	1.1	2.2	6.25	-1.5	1.49	1.13
Au2Ir2-Au	0.795005389	-1.178761735	1.842446891	-0.23476847	3.843025782	2.4328224	9.1	1.57	2.2	6.63	-2.11	1.5	1.08
Au2Pt2-Au	0.897802894	-1.552033974	1.666136144	-0.01081208	4.341033938	2.459031294	9	2.13	2.28	6.74	-2.25	1.53	1.04
Au2Au2-Au	0.968676644	-3.329902816	1.45273455	1.015608714	6.881214689	2.54	9.23	2.31	2.54	6.01	-3.56	1.59	1.01
CoSc3-Co	0.272103212	1.282545533	2.280876805	-0.401398441	2.461653725	1.598999687	6.56	0.19	1.36	3.84	1.5	1.81	1.24
CoTi3-Co	0.303307804	1.113132078	2.233003218	-0.459236871	2.395828372	1.701528724	6.83	0.08	1.54	4.63	1.5	1.61	1.08
CoV3-Co	0.404403758	0.338088744	2.110358241	-0.362623895	2.495266472	1.750542773	6.75	0.53	1.63	4.88	1.06	1.49	0.98
CoCr3-Co	0.503567974	-0.30157734	2.000008114	-0.258189518	2.643459365	1.792129875	6.77	0.67	1.66	5.27	0.16	1.42	0.9
CoFe3-Co	0.689476047	-0.977923803	1.978505444	0.232546289	2.528701242	1.854831529	7.9	0.15	1.83	5.54	-0.92	1.41	0.8
CoCo3-Co	0.773852001	-1.191808411	1.525578912	0.196888822	3.986478676	1.88	7.88	0.66	1.88	5.76	-1.17	1.39	0.76
CoNi3-Co	0.881807675	-1.625092822	1.454589314	0.488397044	4.739356141	1.89148229	7.64	1.16	1.91	5.77	-1.29	1.38	0.71
CoCu3-Co	0.970560609	-2.585152621	1.186581811	1.037362477	7.521236838	1.889973545	7.73	1.24	1.9	5.3	-2.67	1.41	0.67
CoY3-Co	0.348279794	0.714553941	2.531988992	-0.199711472	2.271061634	1.514463601	6.22	0.31	1.22	3.42	1.95	1.99	1.58
CoZr3-Co	0.423133318	0.299948564	2.693137108	-0.110403775	1.988564855	1.581265316	6.63	0.43	1.33	4.35	1.95	1.77	1.41
CoNb3-Co	0.462914298	0.108514803	2.946691262	-0.048393269	1.873128539	1.734358671	6.76	0.9	1.6	4.69	1.41	1.62	1.28
CoMo3-Co	0.537553346	-0.50279911	2.824708485	-0.030103072	1.858334627	2.015142675	7.09	0.75	2.16	5.09	0.35	1.55	1.2
CoRu3-Co	0.719072777	-1.813761591	2.494373489	0.145545639	2.213932846	2.033715811	7.36	1.05	2.2	5.73	-1.41	1.48	1.05
CoRh3-Co	0.807820088	-2.151012194	2.3329732	0.2745994	2.540532806	2.070362287	7.46	1.14	2.28	5.91	-1.73	1.49	0.99
CoPd3-Co	0.919481801	-2.835971977	2.03197956	0.434876111	3.090554503	2.033715811	8.34	0.56	2.2	5.9	-1.83	1.52	0.94
CoAg3-Co	0.978264397	-4.545849136	1.719513475	1.045824393	6.147485868	1.904835951	7.58	1.3	1.93	5.01	-4.3	1.59	0.89
CoLa3-Co	0.333453688	0.987864755	2.805118646	-1.459045968	9.005880056	1.438054241	5.77	0.5	1.1	3.3	2	1.92	1.58
CoTa3-Co	0.458701516	-0.281734762	2.909815579	-0.040863513	1.919032888	1.679285562	7.89	0.32	1.5	4.86	2	1.62	1.34
CoW3-Co	0.522393151	-0.553798842	3.197853264	-0.014107601	1.833390923	2.106371287	7.98	0.86	2.36	5.09	0.77	1.56	1.27
CoRe3-Co	0.662575993	-1.692255217	2.902838988	0.049931743	1.813065506	1.889973545	7.88	0.15	1.9	5.88	-0.51	1.52	1.2
CoOs3-Co	0.694413671	-2.126795974	2.988060728	0.120731315	2.033407973	2.033715811	8.7	1.1	2.2	6.25	-1.5	1.49	1.13
CoIr3-Co	0.78743536	-2.703983485	2.855199914	0.199606786	2.331534995	2.033715811	9.1	1.57	2.2	6.63	-2.11	1.5	1.08
CoPt3-Co	0.880820633	-3.224796982	2.642698838	0.298631212	2.699246175	2.070362287	9	2.13	2.28	6.74	-2.25	1.53	1.04
NiSc3-Ni	0.227135783	1.41564135	2.35766111	-0.442955067	2.565793299	1.611707169	6.56	0.19	1.36	3.84	1.5	1.81	1.24
NiTi3-Ni	0.283853339	1.084565845	2.181740315	-0.486074844	2.586275076	1.71505102	6.83	0.08	1.54	4.63	1.5	1.61	1.08
NiV3-Ni	0.397114138	0.286513881	2.054108168	-0.360034642	2.708870855	1.76445459	6.75	0.53	1.63	4.88	1.06	1.49	0.98
NiCr3-Ni	0.503569752	-0.309652038	1.906205579	-0.26310215	2.876949274	1.792008472	6.77	0.67	1.66	5.27	0.16	1.42	0.9
NiMn3-Ni	0.573930381	-0.556323087	1.744717062	-0.032878402	3.280652844	1.762577046	7.43	0	1.55	5.45	0.07	1.43	0.86
NiFe3-Ni	0.678415958	-1.108233418	1.982425983	0.246834984	2.498489223	1.869572144	7.9	0.15	1.83	5.54	-0.92	1.41	0.8
NiCo3-Ni	0.774016298	-1.435089908	1.688414647	0.336252442	3.28674239	1.896304745	7.88	0.66	1.88	5.76	-1.17	1.39	0.76
NiNi3-Ni	0.868536768	-1.411365263	1.373783112	0.459400788	4.938422317	1.91	7.64	1.16	1.91	5.77	-1.29	1.38	0.71
NiCu3-Ni	0.970816819	-2.329043312	1.141705213	1.036347592	7.641833582	1.904993438	7.73	1.24	1.9	5.3	-2.67	1.41	0.67
NiY3-Ni	0.308390523	0.715704479	2.531323032	-0.261281519	2.335357947	1.526499263	6.22	0.31	1.22	3.42	1.95	1.99	1.58
NiZr3-Ni	0.360620277	0.338476279	2.640229716	-0.147248137	2.081393849	1.593831861	6.63	0.43	1.33	4.35	1.95	1.77	1.41
NiNb3-Ni	0.444331579	0.156346345	2.902286669	-0.088515914	1.917341793	1.748141871	6.76	0.9	1.6	4.69	1.41	1.62	1.28
NiMo3-Ni	0.520551586	-0.546889485	2.785385541	-0.042392457	1.900894355	2.031157306	7.09	0.75	2.16	5.09	0.35	1.55	1.2
NiRu3-Ni	0.716254378	-1.743838149	2.372197016	0.167114774	2.307061653	2.049878045	7.36	1.05	2.2	5.73	-1.41	1.48	1.05
NiRh3-Ni	0.80532388	-2.032589393	2.215174318	0.299057419	2.6636942	2.086815756	7.46	1.14	2.28	5.91	-1.73	1.49	0.99
NiPd3-Ni	0.91677893	-2.5865779	1.935300494	0.4632985	3.218870896	2.049878045	8.34	0.56	2.2	5.9	-1.83	1.52	0.94
NiAg3-Ni	0.976276387	-4.400647982	1.673875935	1.198108201	6.537852809	1.919973958	7.58	1.3	1.93	5.01	-4.3	1.59	0.89
NiLa3-Ni	0.385820489	0.05755577	3.129384658	-1.039356613	5.772909242	1.449482666	5.77	0.5	1.1	3.3	2	1.92	1.58
NiTa3-Ni	0.427308186	-0.183026248	2.914826374	-0.056257942	1.990356987	1.692631088	7.89	0.32	1.5	4.86	2	1.62	1.34
NiW3-Ni	0.51108815	-0.462826289	3.124137456	-0.035366475	1.859044613	2.123110925	7.98	0.86	2.36	5.09	0.77	1.56	1.27
NiRe3-Ni	0.620723034	-1.287465344	2.951103655	0.055335242	1.883769497	1.904993438	7.88	0.15	1.9	5.88	-0.51	1.52	1.2
NiOs3-Ni	0.692888742	-2.123130961	2.842817506	0.156981016	2.108643069	2.049878045	8.7	1.1	2.2	6.25	-1.5	1.49	1.13
NiIr3-Ni	0.782713956	-2.535607903	2.716879674	0.224817761	2.419420777	2.049878045	9.1	1.57	2.2	6.63	-2.11	1.5	1.08
NiPt3-Ni	0.877975298	-2.963181056	2.503285631	0.318027606	2.784275234	2.086815756	9	2.13	2.28	6.74	-2.25	1.53	1.04
CuSc3-Cu	0.204989994	1.606703056	2.220444124	-0.549553488	3.011655017	1.607482504	6.56	0.19	1.36	3.84	1.5	1.81	1.24
CuTi3-Cu	0.259036445	1.053089154	1.959563256	-0.554816247	3.138820625	1.710555465	6.83	0.08	1.54	4.63	1.5	1.61	1.08
CuV3-Cu	0.381799095	0.391692119	1.846490254	-0.405518421	3.381567805	1.759829537	6.75	0.53	1.63	4.88	1.06	1.49	0.98
CuCr3-Cu	0.490241052	0.007148356	2.051087198	-0.134768189	2.65273919	1.77595045	6.77	0.67	1.66	5.27	0.16	1.42	0.9
CuMn3-Cu	0.541726141	-0.43880871	2.316512603	0.124646475	2.084139763	1.71610023	7.43	0	1.55	5.45	0.07	1.43	0.86
CuFe3-Cu	0.666230187	-1.106531885	1.876570219	0.232708033	2.598975437	1.864671553	7.9	0.15	1.83	5.54	-0.92	1.41	0.8
CuCo3-Cu	0.777265591	-1.2282895	1.536149403	0.273123971	3.712392263	1.889973545	7.88	0.66	1.88	5.76	-1.17	1.39	0.76
CuNi3-Cu	0.870092616	-1.007978482	1.221700273	0.265882945	6.160391175	1.904993438	7.64	1.16	1.91	5.77	-1.29	1.38	0.71
CuCu3-Cu	0.97221492	-2.383500599	1.049694885	1.120234242	9.923549026	1.9	7.73	1.24	1.9	5.3	-2.67	1.41	0.67
CuY3-Cu	0.231344875	1.009748655	2.38020242	-0.342333119	2.686608706	1.522497947	6.22	0.31	1.22	3.42	1.95	1.99	1.58
CuZr3-Cu	0.320967362	0.598958203	2.488469087	-0.231480169	2.400289731	1.58965405	6.63	0.43	1.33	4.35	1.95	1.77	1.41
CuNb3-Cu	0.43626324	0.375046492	2.638293591	-0.178902327	2.147093427	1.743559577	6.76	0.9	1.6	4.69	1.41	1.62	1.28
CuMo3-Cu	0.507939136	-0.34476573	2.451419325	-0.150978303	2.174435161	2.025833162	7.09	0.75	2.16	5.09	0.35	1.55	1.2
CuRu3-Cu	0.714701288	-1.417560302	2.120821899	0.094201275	2.617764866	2.04450483	7.36	1.05	2.2	5.73	-1.41	1.48	1.05
CuRh3-Cu	0.803168979	-1.670205329	1.982780467	0.251706325	3.019755351	2.081345719	7.46	1.14	2.28	5.91	-1.73	1.49	0.99
CuPd3-Cu	0.922251031	-2.267017486	1.749588611	0.435150403	3.587505864	2.04450483	8.34	0.56	2.2	5.9	-1.83	1.52	0.94
CuAg3-Cu	0.974668884	-4.508367203	1.533692479	1.425869784	7.91198766	1.914941252	7.58	1.3	1.93	5.01	-4.3	1.59	0.89
CuLa3-Cu	0.285009916	0.424509288	2.884949107	-1.200211872	7.113467259	1.445683229	5.77	0.5	1.1	3.3	2	1.92	1.58
CuTa3-Cu	0.417245391	0.317152168	2.816339664	-0.150058524	2.189936833	1.688194302	7.89	0.32	1.5	4.86	2	1.62	1.34
CuW3-Cu	0.499433511	-0.170826001	2.772003227	-0.112373062	1.970111256	2.117545749	7.98	0.86	2.36	5.09	0.77	1.56	1.27
CuRe3-Cu	0.609123784	-1.020305731	2.610111919	-0.068219742	2.056123021	1.9	7.88	0.15	1.9	5.88	-0.51	1.52	1.2
CuOs3-Cu	0.687778585	-1.624562871	2.542372994	0.051489834	2.34110791	2.04450483	8.7	1.1	2.2	6.25	-1.5	1.49	1.13
CuIr3-Cu	0.7796743	-2.116356452	2.429562126	0.169547048	2.65055387	2.04450483	9.1	1.57	2.2	6.63	-2.11	1.5	1.08
CuPt3-Cu	0.889899089	-2.542764614	2.243291062	0.306236668	3.010475113	2.081345719	9	2.13	2.28	6.74	-2.25	1.53	1.04
CuAu3-Cu	0.962746431	-4.238025255	1.997664486	0.731186672	4.564681259	2.196815878	9.23	2.31	2.54	6.01	-3.56	1.59	1.01
RuSc3-Ru	0.256500887	1.151987058	1.976293312	-0.747468979	2.864275498	1.729739865	6.56	0.19	1.36	3.84	1.5	1.81	1.24
RuTi3-Ru	0.292323547	0.892516668	1.834763261	-0.825455759	3.095204327	1.840652058	6.83	0.08	1.54	4.63	1.5	1.61	1.08
RuV3-Ru	0.392677927	0.350842413	1.809645499	-0.739453895	3.064626933	1.893673678	6.75	0.53	1.63	4.88	1.06	1.49	0.98
RuCr3-Ru	0.490913225	-0.152800574	1.736784128	-0.639284519	3.182194064	1.91102067	6.77	0.67	1.66	5.27	0.16	1.42	0.9
RuMn3-Ru	0.564516304	-0.466264965	1.616473423	-0.385681131	3.609990954	1.846618531	7.43	0	1.55	5.45	0.07	1.43	0.86
RuFe3-Ru	0.673429939	-1.047753135	1.883424276	0.173818585	2.30042246	2.006489472	7.9	0.15	1.83	5.54	-0.92	1.41	0.8
RuCo3-Ru	0.768165651	-1.275401765	1.578458887	0.213036638	3.246242402	2.033715811	7.88	0.66	1.88	5.76	-1.17	1.39	0.76
RuNi3-Ru	0.875882525	-1.196324753	1.223400091	0.251383781	5.662604688	2.049878045	7.64	1.16	1.91	5.77	-1.29	1.38	0.71
RuCu3-Ru	0.969680841	-2.217424551	1.029538648	1.052181293	8.524960539	2.04450483	7.73	1.24	1.9	5.3	-2.67	1.41	0.67
RuY3-Ru	0.335608734	1.012741639	2.33760064	-0.424097161	2.207941052	1.638291793	6.22	0.31	1.22	3.42	1.95	1.99	1.58
RuZr3-Ru	0.397078429	0.624155854	2.457919936	-0.332130088	2.084745851	1.710555465	6.63	0.43	1.33	4.35	1.95	1.77	1.41
RuNb3-Ru	0.450819145	0.261564322	2.503218425	-0.303433148	2.027261432	1.876166304	6.76	0.9	1.6	4.69	1.41	1.62	1.28
RuMo3-Ru	0.521195374	-0.330206573	2.451289782	-0.20011459	2.063753465	2.179908255	7.09	0.75	2.16	5.09	0.35	1.55	1.2
RuRu3-Ru	0.705136056	-1.408708804	2.077544437	0.107532314	2.469528899	2.2	7.36	1.05	2.2	5.73	-1.41	1.48	1.05
RuRh3-Ru	0.804347719	-1.716455468	1.903419547	0.310813321	2.945296908	2.239642829	7.46	1.14	2.28	5.91	-1.73	1.49	0.99
RuPd3-Ru	0.915384443	-2.271346815	1.616920641	0.57044594	3.700115141	2.2	8.34	0.56	2.2	5.9	-1.83	1.52	0.94
RuAg3-Ru	0.977001538	-4.058535479	1.417599797	1.779616283	8.664964338	2.060582442	7.58	1.3	1.93	5.01	-4.3	1.59	0.89
RuLa3-Ru	0.41724698	0.282492526	2.794230872	-0.976515838	5.835490356	1.555634919	5.77	0.5	1.1	3.3	2	1.92	1.58
RuTa3-Ru	0.447747807	0.377070594	2.702269505	-0.278729684	2.060830271	1.816590212	7.89	0.32	1.5	4.86	2	1.62	1.34
RuW3-Ru	0.502935406	-0.157153709	2.742554987	-0.209622199	2.01464712	2.278596059	7.98	0.86	2.36	5.09	0.77	1.56	1.27
RuRe3-Ru	0.647927383	-1.360706401	2.417293972	-0.175555069	1.932184068	2.04450483	7.88	0.15	1.9	5.88	-0.51	1.52	1.2
RuOs3-Ru	0.683284888	-1.575538343	2.520741371	0.094160803	2.200593589	2.2	8.7	1.1	2.2	6.25	-1.5	1.49	1.13
RuIr3-Ru	0.78484877	-2.072834195	2.318801552	0.263782763	2.536685335	2.2	9.1	1.57	2.2	6.63	-2.11	1.5	1.08
RuPt3-Ru	0.878194226	-2.528066994	2.053997313	0.457346779	3.0670141	2.239642829	9	2.13	2.28	6.74	-2.25	1.53	1.04
RuAu3-Ru	0.959737624	-3.855548405	1.803390648	1.032734593	5.027450057	2.363895091	9.23	2.31	2.54	6.01	-3.56	1.59	1.01
RhSc3-Rh	0.204639981	1.640319303	2.178119337	-0.757308974	3.049596371	1.760908856	6.56	0.19	1.36	3.84	1.5	1.81	1.24
RhTi3-Rh	0.268843722	1.017282782	1.968150167	-0.777227194	3.342873322	1.873819628	6.83	0.08	1.54	4.63	1.5	1.61	1.08
RhV3-Rh	0.380280762	0.309216688	1.880978452	-0.667187298	3.442007013	1.92779667	6.75	0.53	1.63	4.88	1.06	1.49	0.98
RhCr3-Rh	0.488101378	-0.247571257	1.75245591	-0.638123598	3.562544869	1.945456245	6.77	0.67	1.66	5.27	0.16	1.42	0.9
RhMn3-Rh	0.554284856	-0.513504064	2.385204417	0.10089217	1.866725726	1.879893614	7.43	0	1.55	5.45	0.07	1.43	0.86
RhFe3-Rh	0.668724464	-1.138740841	1.93030146	0.189289325	2.29436651	2.042645344	7.9	0.15	1.83	5.54	-0.92	1.41	0.8
RhCo3-Rh	0.765082705	-1.317872679	1.602997699	0.197837238	3.218389312	2.070362287	7.88	0.66	1.88	5.76	-1.17	1.39	0.76
RhCu3-Rh	0.970674359	-2.030777268	1.012238058	0.892543202	8.727276889	2.081345719	7.73	1.24	1.9	5.3	-2.67	1.41	0.67
RhY3-Rh	0.29064181	1.050628181	2.471507133	-0.473151068	2.347735121	1.667812939	6.22	0.31	1.22	3.42	1.95	1.99	1.58
RhZr3-Rh	0.341722927	0.840400247	2.614302227	-0.353799364	2.21818379	1.741378764	6.63	0.43	1.33	4.35	1.95	1.77	1.41
RhNb3-Rh	0.420015209	0.348598033	2.604252193	-0.311048083	2.150789536	1.909973822	6.76	0.9	1.6	4.69	1.41	1.62	1.28
RhMo3-Rh	0.50754886	-0.331265129	2.464006741	-0.219553008	2.184843204	2.219189041	7.09	0.75	2.16	5.09	0.35	1.55	1.2
RhRu3-Rh	0.70776442	-1.390658343	2.048278464	0.061737712	2.621192145	2.239642829	7.36	1.05	2.2	5.73	-1.41	1.48	1.05
RhRh3-Rh	0.790998876	-1.695848465	1.876662314	0.260372166	3.11956573	2.28	7.46	1.14	2.28	5.91	-1.73	1.49	0.99
RhPd3-Rh	0.918326271	-2.168515077	1.595539032	0.500341008	3.820184352	2.239642829	8.34	0.56	2.2	5.9	-1.83	1.52	0.94
RhAg3-Rh	0.977304875	-3.906616412	1.393768264	1.704058101	8.645140475	2.09771304	7.58	1.3	1.93	5.01	-4.3	1.59	0.89
RhTa3-Rh	0.40261264	0.442329449	2.802197092	-0.32139434	2.138903181	1.849324201	7.89	0.32	1.5	4.86	2	1.62	1.34
RhW3-Rh	0.489319262	-0.20670545	2.766994594	-0.243741721	2.085155287	2.319655147	7.98	0.86	2.36	5.09	0.77	1.56	1.27
RhRe3-Rh	0.611813893	-1.135231651	2.544504673	-0.194649069	1.99495028	2.081345719	7.88	0.15	1.9	5.88	-0.51	1.52	1.2
RhOs3-Rh	0.67963384	-1.597810869	2.501362009	0.063473575	2.289457321	2.239642829	8.7	1.1	2.2	6.25	-1.5	1.49	1.13
RhIr3-Rh	0.777204047	-2.014644676	2.286965224	0.219343346	2.631870612	2.239642829	9.1	1.57	2.2	6.63	-2.11	1.5	1.08
RhPt3-Rh	0.879979757	-2.438029125	2.031456435	0.406528318	3.162655692	2.28	9	2.13	2.28	6.74	-2.25	1.53	1.04
RhAu3-Rh	0.960798456	-3.646395848	1.770046496	0.947484968	4.975115609	2.406491222	9.23	2.31	2.54	6.01	-3.56	1.59	1.01
PdSc3-Pd	0.188286269	1.464983764	2.095195549	-0.871256742	3.535782876	1.729739865	6.56	0.19	1.36	3.84	1.5	1.81	1.24
PdTi3-Pd	0.250878658	0.937902721	1.845825459	-0.791375476	3.918764696	1.840652058	6.83	0.08	1.54	4.63	1.5	1.61	1.08
PdV3-Pd	0.375144499	0.245956181	1.720467529	-0.745587414	4.048417476	1.893673678	6.75	0.53	1.63	4.88	1.06	1.49	0.98
PdCr3-Pd	0.491919092	-0.299416666	1.949907858	-0.3096351	2.52441717	1.91102067	6.77	0.67	1.66	5.27	0.16	1.42	0.9
PdFe3-Pd	0.660804266	-1.21145108	1.91142944	0.180931605	2.203171447	2.006489472	7.9	0.15	1.83	5.54	-0.92	1.41	0.8
PdCo3-Pd	0.762705635	-1.403536041	1.594574474	0.20365687	3.045941575	2.033715811	7.88	0.66	1.88	5.76	-1.17	1.39	0.76
PdNi3-Pd	0.872453073	-1.145516981	1.179118447	0.215994735	5.630827465	2.049878045	7.64	1.16	1.91	5.77	-1.29	1.38	0.71
PdCu3-Pd	0.977175926	-1.689429736	0.941455026	0.632229907	8.567335249	2.04450483	7.73	1.24	1.9	5.3	-2.67	1.41	0.67
PdY3-Pd	0.230885177	1.002829498	2.37972323	-0.575960686	2.737828049	1.638291793	6.22	0.31	1.22	3.42	1.95	1.99	1.58
PdZr3-Pd	0.315065845	0.973950108	2.54563524	-0.428528052	2.463272532	1.710555465	6.63	0.43	1.33	4.35	1.95	1.77	1.41
PdNb3-Pd	0.403302017	0.334921719	2.424434343	-0.392958953	2.396346617	1.876166304	6.76	0.9	1.6	4.69	1.41	1.62	1.28
PdMo3-Pd	0.502324149	-0.351447168	2.309470843	-0.228237132	2.344620854	2.179908255	7.09	0.75	2.16	5.09	0.35	1.55	1.2
PdRu3-Pd	0.712968953	-1.23998782	1.830278438	0.025899498	2.871909743	2.2	7.36	1.05	2.2	5.73	-1.41	1.48	1.05
PdRh3-Pd	0.797851333	-1.409435012	1.696427934	0.260969412	3.377462392	2.239642829	7.46	1.14	2.28	5.91	-1.73	1.49	0.99
PdPd3-Pd	0.917379148	-1.711710888	1.426114733	0.390813626	3.983479784	2.2	8.34	0.56	2.2	5.9	-1.83	1.52	0.94
PdAg3-Pd	0.981770692	-3.620196523	1.271030452	1.772726307	9.327516835	2.060582442	7.58	1.3	1.93	5.01	-4.3	1.59	0.89
PdLa3-Pd	0.311969592	0.641044874	2.744410744	-0.947496542	5.445675921	1.555634919	5.77	0.5	1.1	3.3	2	1.92	1.58
PdTa3-Pd	0.383169408	0.569908428	2.675895181	-0.39938526	2.32508962	1.816590212	7.89	0.32	1.5	4.86	2	1.62	1.34
PdW3-Pd	0.47119613	-0.212788294	2.528550911	-0.312279328	2.259189145	2.278596059	7.98	0.86	2.36	5.09	0.77	1.56	1.27
PdRe3-Pd	0.588807893	-0.980705505	2.551673279	-0.091199889	2.124846065	2.04450483	7.88	0.15	1.9	5.88	-0.51	1.52	1.2
PdOs3-Pd	0.678699439	-1.564565032	2.368946003	0.032426513	2.325475109	2.2	8.7	1.1	2.2	6.25	-1.5	1.49	1.13
PdIr3-Pd	0.779335587	-1.707660567	2.048396874	0.182591038	2.83942801	2.2	9.1	1.57	2.2	6.63	-2.11	1.5	1.08
PdPt3-Pd	0.883405996	-1.957505739	1.807625353	0.342987244	3.35332388	2.239642829	9	2.13	2.28	6.74	-2.25	1.53	1.04
PdAu3-Pd	0.968668041	-3.272132362	1.604203872	0.963259704	5.215508679	2.363895091	9.23	2.31	2.54	6.01	-3.56	1.59	1.01
AgSc3-Ag	0.185999311	1.376244487	1.825069606	-0.98414043	5.021346034	1.620123452	6.56	0.19	1.36	3.84	1.5	1.81	1.24
AgTi3-Ag	0.253986826	0.823151635	1.543146491	-0.745465746	5.634449145	1.724006961	6.83	0.08	1.54	4.63	1.5	1.61	1.08
AgV3-Ag	0.377372687	0.61737444	1.881873067	-0.352092895	3.311466775	1.773668515	6.75	0.53	1.63	4.88	1.06	1.49	0.98
AgCr3-Ag	0.487476677	0.543696412	2.261017382	-0.071080404	2.209026188	1.789916199	6.77	0.67	1.66	5.27	0.16	1.42	0.9
AgMn3-Ag	0.54133122	-0.819649793	2.329655569	0.152246669	1.750405223	1.729595328	7.43	0	1.55	5.45	0.07	1.43	0.86
AgFe3-Ag	0.676819077	-1.06722386	1.814393954	0.197148948	2.668163596	1.879334989	7.9	0.15	1.83	5.54	-0.92	1.41	0.8
AgCo3-Ag	0.765215419	-1.258181185	1.501245032	0.202698978	3.933250271	1.911096036	7.88	0.66	1.88	5.76	-1.17	1.39	0.76
AgNi3-Ag	0.88849664	-0.933947576	1.118683662	0.059457709	8.33986244	1.919973958	7.64	1.16	1.91	5.77	-1.29	1.38	0.71
AgCu3-Ag	0.979337906	-1.959917147	0.859564574	0.708845702	16.97474395	1.914941252	7.73	1.24	1.9	5.3	-2.67	1.41	0.67
AgY3-Ag	0.232494038	1.296386392	2.269449492	-0.621390181	3.561009559	1.534470593	6.22	0.31	1.22	3.42	1.95	1.99	1.58
AgZr3-Ag	0.31151773	0.99722436	2.255202933	-0.576390536	3.223537914	1.602154799	6.63	0.43	1.33	4.35	1.95	1.77	1.41
AgNb3-Ag	0.41267719	0.344154231	2.062508741	-0.49216596	3.401861835	1.757270611	6.76	0.9	1.6	4.69	1.41	1.62	1.28
AgMo3-Ag	0.50944496	-0.304511322	2.290870655	-0.126442175	2.475620218	2.041763943	7.09	0.75	2.16	5.09	0.35	1.55	1.2
AgRu3-Ag	0.712936538	-0.968169721	1.742430605	-0.053256114	3.414415443	2.060582442	7.36	1.05	2.2	5.73	-1.41	1.48	1.05
AgRh3-Ag	0.822431998	-1.018501407	1.435180608	0.073222679	5.22953123	2.09771304	7.46	1.14	2.28	5.91	-1.73	1.49	0.99
AgPd3-Ag	0.934596219	-1.413049105	1.252810106	0.086942817	6.313808883	2.060582442	8.34	0.56	2.2	5.9	-1.83	1.52	0.94
AgAg3-Ag	0.979916623	-3.976142801	1.130814849	2.4147611	16.5596864	1.93	7.58	1.3	1.93	5.01	-4.3	1.59	0.89
AgLa3-Ag	0.290843515	1.005485531	2.369029931	-0.838352235	5.809377982	1.457051818	5.77	0.5	1.1	3.3	2	1.92	1.58
AgTa3-Ag	0.381058261	0.490687274	2.251923638	-0.576464494	3.148433723	1.701469953	7.89	0.32	1.5	4.86	2	1.62	1.34
AgW3-Ag	0.48638909	-0.032311379	2.381357993	-0.24152848	2.493542224	2.134197742	7.98	0.86	2.36	5.09	0.77	1.56	1.27
AgRe3-Ag	0.586125533	-0.912269533	2.486979722	-0.058565874	2.315746839	1.918694888	7.88	0.15	1.9	5.88	-0.51	1.52	1.2
AgOs3-Ag	0.684097859	-1.323049057	2.224035169	-0.073288524	2.595688484	2.060582442	8.7	1.1	2.2	6.25	-1.5	1.49	1.13
AgIr3-Ag	0.793825875	-1.326256702	1.839938126	0.001227554	3.472597176	2.060582442	9.1	1.57	2.2	6.63	-2.11	1.5	1.08
AgPt3-Ag	0.902381937	-1.571918796	1.559446483	0.21776665	4.653138014	2.09771304	9	2.13	2.28	6.74	-2.25	1.53	1.04
AgAu3-Ag	0.972594136	-3.464811303	1.40553374	1.289079136	8.274757729	2.214091236	9.23	2.31	2.54	6.01	-3.56	1.59	1.01
OsSc3-Os	0.265591776	1.173484222	2.107147312	-0.845583226	3.363413369	1.729739865	6.56	0.19	1.36	3.84	1.5	1.81	1.24
OsTi3-Os	0.293940208	0.920280606	1.930994199	-0.893333664	3.517971899	1.840652058	6.83	0.08	1.54	4.63	1.5	1.61	1.08
OsV3-Os	0.40447805	0.363269438	1.926965227	-0.824265612	3.608249225	1.893673678	6.75	0.53	1.63	4.88	1.06	1.49	0.98
OsCr3-Os	0.507376174	-0.185316109	1.918775758	-0.729310599	3.6477486	1.91102067	6.77	0.67	1.66	5.27	0.16	1.42	0.9
OsMn3-Os	0.573283974	-0.48754718	1.790351311	-0.506832178	3.904587573	1.846618531	7.43	0	1.55	5.45	0.07	1.43	0.86
OsFe3-Os	0.67575599	-1.012837489	1.920905259	0.062138711	2.649564227	2.006489472	7.9	0.15	1.83	5.54	-0.92	1.41	0.8
OsCo3-Os	0.778495979	-1.275829458	1.644284578	0.017207319	3.822503559	2.033715811	7.88	0.66	1.88	5.76	-1.17	1.39	0.76
OsNi3-Os	0.885230413	-1.336356463	1.351465645	0.039265381	5.928911953	2.049878045	7.64	1.16	1.91	5.77	-1.29	1.38	0.71
OsCu3-Os	0.968882975	-2.434245787	1.132981659	0.774641455	8.581428599	2.04450483	7.73	1.24	1.9	5.3	-2.67	1.41	0.67
OsY3-Os	0.35234286	0.883753351	2.493682161	-0.522183865	2.569861611	1.638291793	6.22	0.31	1.22	3.42	1.95	1.99	1.58
OsZr3-Os	0.404748808	0.557311347	2.621397137	-0.416365643	2.321491761	1.710555465	6.63	0.43	1.33	4.35	1.95	1.77	1.41
OsNb3-Os	0.459307089	0.180388025	2.658107311	-0.381428946	2.253356723	1.876166304	6.76	0.9	1.6	4.69	1.41	1.62	1.28
OsMo3-Os	0.529178943	-0.398363242	2.642528675	-0.26873522	2.254621915	2.179908255	7.09	0.75	2.16	5.09	0.35	1.55	1.2
OsRu3-Os	0.720871326	-1.507116151	2.278615191	-0.002875888	2.586684252	2.2	7.36	1.05	2.2	5.73	-1.41	1.48	1.05
OsRh3-Os	0.810881698	-1.87177015	2.08124981	0.195134917	2.984323333	2.239642829	7.46	1.14	2.28	5.91	-1.73	1.49	0.99
OsPd3-Os	0.917050755	-2.508196832	1.775564267	0.447737188	3.703781937	2.2	8.34	0.56	2.2	5.9	-1.83	1.52	0.94
OsAg3-Os	0.975668664	-4.193873924	1.49653657	1.59092917	7.967480112	2.060582442	7.58	1.3	1.93	5.01	-4.3	1.59	0.89
OsLa3-Os	0.429957612	0.153620718	2.926123458	-0.974154642	5.488913604	1.555634919	5.77	0.5	1.1	3.3	2	1.92	1.58
OsTa3-Os	0.456028942	0.304236711	2.866562345	-0.346706421	2.211766724	1.816590212	7.89	0.32	1.5	4.86	2	1.62	1.34
OsW3-Os	0.515641037	-0.283325599	2.911130649	-0.264268282	2.144220122	2.278596059	7.98	0.86	2.36	5.09	0.77	1.56	1.27
OsRe3-Os	0.681810751	-1.659079298	2.590460683	-0.202302447	2.141620768	2.04450483	7.88	0.15	1.9	5.88	-0.51	1.52	1.2
OsOs3-Os	0.693388829	-1.69827329	2.742351653	0.031077219	2.250690353	2.2	8.7	1.1	2.2	6.25	-1.5	1.49	1.13
OsIr3-Os	0.787229288	-2.203756494	2.511246449	0.189025447	2.522594692	2.2	9.1	1.57	2.2	6.63	-2.11	1.5	1.08
OsPt3-Os	0.879030674	-2.730474105	2.213108893	0.392312413	3.020522475	2.239642829	9	2.13	2.28	6.74	-2.25	1.53	1.04
OsAu3-Os	0.957766278	-4.020721685	1.903743076	0.942683676	4.749312041	2.363895091	9.23	2.31	2.54	6.01	-3.56	1.59	1.01
IrSc3-Ir	0.21288635	1.613172426	2.267504625	-0.959200612	3.681580595	1.729739865	6.56	0.19	1.36	3.84	1.5	1.81	1.24
IrTi3-Ir	0.265868804	1.071271393	2.044135528	-0.938782777	3.903348486	1.840652058	6.83	0.08	1.54	4.63	1.5	1.61	1.08
IrV3-Ir	0.38405132	0.296693678	1.976113108	-0.878155809	4.038396674	1.893673678	6.75	0.53	1.63	4.88	1.06	1.49	0.98
IrCr3-Ir	0.489445772	-0.260785871	1.875404314	-0.882875521	4.239871064	1.91102067	6.77	0.67	1.66	5.27	0.16	1.42	0.9
IrMn3-Ir	0.553146733	-0.479556644	2.39229976	0.016383387	2.004972381	1.846618531	7.43	0	1.55	5.45	0.07	1.43	0.86
IrNi3-Ir	0.871111553	-1.198280223	1.295231951	-0.202827852	6.523948616	2.049878045	7.64	1.16	1.91	5.77	-1.29	1.38	0.71
IrCu3-Ir	0.968292104	-2.20582123	1.098904311	0.461530084	8.491355257	2.04450483	7.73	1.24	1.9	5.3	-2.67	1.41	0.67
IrY3-Ir	0.298106955	1.025291529	2.643993499	-0.637667635	2.753555795	1.638291793	6.22	0.31	1.22	3.42	1.95	1.99	1.58
IrZr3-Ir	0.346589104	0.839332629	2.778482764	-0.505974273	2.502934089	1.710555465	6.63	0.43	1.33	4.35	1.95	1.77	1.41
IrNb3-Ir	0.42384526	0.246029321	2.747745628	-0.461212726	2.433197555	1.876166304	6.76	0.9	1.6	4.69	1.41	1.62	1.28
IrMo3-Ir	0.510912647	-0.38595367	2.613919017	-0.357668914	2.445178009	2.179908255	7.09	0.75	2.16	5.09	0.35	1.55	1.2
IrRu3-Ir	0.712191955	-1.431806737	2.171425236	-0.129663618	2.79262654	2.2	7.36	1.05	2.2	5.73	-1.41	1.48	1.05
IrRh3-Ir	0.800185453	-1.757264011	1.985804005	0.06914301	3.194483845	2.239642829	7.46	1.14	2.28	5.91	-1.73	1.49	0.99
IrPd3-Ir	0.916566622	-2.305344554	1.689168358	0.300026725	3.828321647	2.2	8.34	0.56	2.2	5.9	-1.83	1.52	0.94
IrAg3-Ir	0.976128341	-3.982532584	1.444225611	1.520706576	7.978931822	2.060582442	7.58	1.3	1.93	5.01	-4.3	1.59	0.89
IrLa3-Ir	0.359861548	0.501025076	3.037256174	-0.923582394	4.874794485	1.555634919	5.77	0.5	1.1	3.3	2	1.92	1.58
IrTa3-Ir	0.409845757	0.381731496	2.959367834	-0.455867017	2.348127144	1.816590212	7.89	0.32	1.5	4.86	2	1.62	1.34
IrW3-Ir	0.491391616	-0.283237974	2.907458565	-0.35842277	2.273475466	2.278596059	7.98	0.86	2.36	5.09	0.77	1.56	1.27
IrRe3-Ir	0.61998553	-1.227712581	2.663298022	-0.330966376	2.187765392	2.04450483	7.88	0.15	1.9	5.88	-0.51	1.52	1.2
IrOs3-Ir	0.68389079	-1.638821114	2.633606727	-0.078012199	2.365638861	2.2	8.7	1.1	2.2	6.25	-1.5	1.49	1.13
IrIr3-Ir	0.7727709	-2.131776247	2.40127409	0.084322246	2.624811905	2.2	9.1	1.57	2.2	6.63	-2.11	1.5	1.08
IrPt3-Ir	0.879986593	-2.574427571	2.111075034	0.295645258	3.11230928	2.239642829	9	2.13	2.28	6.74	-2.25	1.53	1.04
IrAu3-Ir	0.95859183	-3.685699502	1.822220619	0.839249908	4.644509526	2.363895091	9.23	2.31	2.54	6.01	-3.56	1.59	1.01
PtSc3-Pt	0.185842399	1.462518165	2.244597273	-1.068441454	4.04423963	1.760908856	6.56	0.19	1.36	3.84	1.5	1.81	1.24
PtV3-Pt	0.372566717	0.154206088	1.905561009	-0.93927507	4.343033852	1.92779667	6.75	0.53	1.63	4.88	1.06	1.49	0.98
PtCr3-Pt	0.491310175	-0.352352356	1.979214556	-0.605582899	3.292172364	1.945456245	6.77	0.67	1.66	5.27	0.16	1.42	0.9
PtMn3-Pt	0.531394787	-0.537087382	2.45252578	0.051437615	1.849486075	1.879893614	7.43	0	1.55	5.45	0.07	1.43	0.86
PtFe3-Pt	0.659280002	-1.271439955	1.978953865	0.082385554	2.318873376	2.042645344	7.9	0.15	1.83	5.54	-0.92	1.41	0.8
PtCo3-Pt	0.750686782	-1.357795826	1.633795295	-0.006698522	3.388295361	2.070362287	7.88	0.66	1.88	5.76	-1.17	1.39	0.76
PtNi3-Pt	0.857864913	-1.144243739	1.258507632	-0.190321724	6.178039393	2.086815756	7.64	1.16	1.91	5.77	-1.29	1.38	0.71
PtCu3-Pt	0.972383503	-1.81694558	1.040333028	0.177403568	8.67739235	2.081345719	7.73	1.24	1.9	5.3	-2.67	1.41	0.67
PtY3-Pt	0.213997556	0.879537115	2.610351228	-0.730644959	2.956665675	1.667812939	6.22	0.31	1.22	3.42	1.95	1.99	1.58
PtZr3-Pt	0.297551429	0.877091077	2.731627914	-0.600826956	2.699460611	1.741378764	6.63	0.43	1.33	4.35	1.95	1.77	1.41
PtNb3-Pt	0.400756076	0.229975845	2.625716937	-0.554509946	2.64131502	1.909973822	6.76	0.9	1.6	4.69	1.41	1.62	1.28
PtMo3-Pt	0.500182307	-0.43524103	2.472236874	-0.394676196	2.584676141	2.219189041	7.09	0.75	2.16	5.09	0.35	1.55	1.2
PtRu3-Pt	0.710632981	-1.372331973	1.987771849	-0.188842038	3.040770671	2.239642829	7.36	1.05	2.2	5.73	-1.41	1.48	1.05
PtRh3-Pt	0.783403826	-1.475083361	1.801497766	0.014611151	3.490338844	2.28	7.46	1.14	2.28	5.91	-1.73	1.49	0.99
PtPd3-Pt	0.912994785	-1.824347927	1.524495234	0.153548337	4.076641175	2.239642829	8.34	0.56	2.2	5.9	-1.83	1.52	0.94
PtAg3-Pt	0.976742247	-3.612646617	1.308536254	1.512258449	8.424023921	2.09771304	7.58	1.3	1.93	5.01	-4.3	1.59	0.89
PtLa3-Pt	0.321103433	0.577200541	2.915616871	-0.898693919	4.560367967	1.583666632	5.77	0.5	1.1	3.3	2	1.92	1.58
PtTa3-Pt	0.396332083	0.400892936	2.882743885	-0.535096315	2.504193991	1.849324201	7.89	0.32	1.5	4.86	2	1.62	1.34
PtW3-Pt	0.475832497	-0.312405718	2.730893597	-0.431050785	2.404726031	2.319655147	7.98	0.86	2.36	5.09	0.77	1.56	1.27
PtRe3-Pt	0.595856943	-1.075687729	2.712346167	-0.204219695	2.214178982	2.081345719	7.88	0.15	1.9	5.88	-0.51	1.52	1.2
PtOs3-Pt	0.681043493	-1.670234031	2.502950325	-0.082977457	2.35815445	2.239642829	8.7	1.1	2.2	6.25	-1.5	1.49	1.13
PtIr3-Pt	0.775839743	-1.834320657	2.185228794	0.023765818	2.782658135	2.239642829	9.1	1.57	2.2	6.63	-2.11	1.5	1.08
PtPt3-Pt	0.877173576	-2.116333654	1.8980136	0.208080793	3.249208186	2.28	9	2.13	2.28	6.74	-2.25	1.53	1.04
PtAu3-Pt	0.966555935	-3.292024759	1.648476648	0.829784438	4.939371487	2.406491222	9.23	2.31	2.54	6.01	-3.56	1.59	1.01
AuSc3-Au	0.182395051	1.368209442	2.016871209	-1.250430654	5.292295254	1.858601625	6.56	0.19	1.36	3.84	1.5	1.81	1.24
AuTi3-Au	0.249632249	0.787531278	1.70582148	-1.089284366	5.927517105	1.977776529	6.83	0.08	1.54	4.63	1.5	1.61	1.08
AuV3-Au	0.375407233	0.500082413	1.966761264	-0.600873757	3.718456814	2.034748142	6.75	0.53	1.63	4.88	1.06	1.49	0.98
AuCr3-Au	0.487358315	0.528531152	2.330012109	-0.200006148	2.379203481	2.053387445	6.77	0.67	1.66	5.27	0.16	1.42	0.9
AuMn3-Au	0.54659805	-0.767500406	2.397672051	0.078814505	1.875588362	1.984187491	7.43	0	1.55	5.45	0.07	1.43	0.86
AuFe3-Au	0.670136094	-1.263106988	1.863074452	0.090310314	2.577925387	2.15596846	7.9	0.15	1.83	5.54	-0.92	1.41	0.8
AuCo3-Au	0.770600187	-1.378228857	1.597131076	0.030291492	3.706971628	2.268977903	7.88	0.66	1.88	5.76	-1.17	1.39	0.76
AuNi3-Au	0.887170159	-0.987699041	1.197788348	-0.238400443	7.471954375	2.202589385	7.64	1.16	1.91	5.77	-1.29	1.38	0.71
AuCu3-Au	0.977924676	-1.963534885	0.989261814	0.081736402	11.50841842	2.196815878	7.73	1.24	1.9	5.3	-2.67	1.41	0.67
AuY3-Au	0.232337713	1.160749694	2.522296257	-0.838405712	3.647595102	1.760340876	6.22	0.31	1.22	3.42	1.95	1.99	1.58
AuZr3-Au	0.308288142	0.965105666	2.464566478	-0.755372664	3.312014063	1.83798803	6.63	0.43	1.33	4.35	1.95	1.77	1.41
AuNb3-Au	0.407940798	0.314725384	2.307351486	-0.665062619	3.311608435	2.015936507	6.76	0.9	1.6	4.69	1.41	1.62	1.28
AuMo3-Au	0.506267689	-0.355172052	2.417313032	-0.284246749	2.494876361	2.342306556	7.09	0.75	2.16	5.09	0.35	1.55	1.2
AuRu3-Au	0.715690646	-1.092983139	1.864499327	-0.204964373	3.243341273	2.363895091	7.36	1.05	2.2	5.73	-1.41	1.48	1.05
AuRh3-Au	0.806589433	-1.105290769	1.568082976	-0.132331377	4.602693538	2.406491222	7.46	1.14	2.28	5.91	-1.73	1.49	0.99
AuPd3-Au	0.931811618	-1.438233068	1.350545553	-0.1109274	5.561229581	2.363895091	8.34	0.56	2.2	5.9	-1.83	1.52	0.94
AuAg3-Au	0.982872506	-3.865003851	1.184821137	1.967366137	13.06846377	2.214091236	7.58	1.3	1.93	5.01	-4.3	1.59	0.89
AuLa3-Au	0.284514097	0.962429979	2.606473312	-0.803919986	4.400002113	1.671526249	5.77	0.5	1.1	3.3	2	1.92	1.58
AuTa3-Au	0.379257312	0.452272981	2.495700745	-0.727689238	3.14515597	1.95192213	7.89	0.32	1.5	4.86	2	1.62	1.34
AuW3-Au	0.478483153	-0.062933713	2.56563784	-0.37825319	2.526994041	2.448346381	7.98	0.86	2.36	5.09	0.77	1.56	1.27
AuOs3-Au	0.681019196	-1.468713774	2.377603686	-0.155491459	2.442148955	2.363895091	8.7	1.1	2.2	6.25	-1.5	1.49	1.13
AuIr3-Au	0.785111741	-1.448443641	1.979544425	-0.110121146	3.16049318	2.363895091	9.1	1.57	2.2	6.63	-2.11	1.5	1.08
AuPt3-Au	0.894924119	-1.585830815	1.653202064	0.055057194	4.179246899	2.406491222	9	2.13	2.28	6.74	-2.25	1.53	1.04
AuAu3-Au	0.968676644	-3.329902816	1.45273455	1.015608714	6.881214689	2.54	9.23	2.31	2.54	6.01	-3.56	1.59	1.01
Co3Sc-Sc-Co	0.177052681	1.399892744	1.693867273	-1.218833065	4.087517366	1.651620531	6.56	0.19	1.36	3.84	1.5	1.81	1.24
Co3Ti-Ti-Co	0.263501384	0.774557064	1.724568105	-0.867210774	3.135101903	1.735813245	6.83	0.08	1.54	4.63	1.5	1.61	1.08
Co3V-V-Co	0.395171512	0.136452771	1.798254712	-0.59050598	2.77504521	1.77570064	6.75	0.53	1.63	4.88	1.06	1.49	0.98
Co3Cr-Cr-Co	0.48789093	-0.131422641	2.102494734	-0.214631703	2.290841863	1.788701803	6.77	0.67	1.66	5.27	0.16	1.42	0.9
Co3Fe-Fe-Co	0.678691049	-1.089972877	1.963884554	0.256625083	2.352868942	1.859838122	7.9	0.15	1.83	5.54	-0.92	1.41	0.8
Co3Co-Co-Co	0.778482687	-1.212221032	1.523600698	0.205574341	3.997011248	1.88	7.88	0.66	1.88	5.76	-1.17	1.39	0.76
Co3Ni-Ni-Co	0.875271887	-1.525698017	1.441963498	0.479175896	4.754276279	1.891943037	7.64	1.16	1.91	5.77	-1.29	1.38	0.71
Co3Cu-Cu-Co	0.967795103	-2.536217526	1.168825957	1.183987293	7.626435275	1.887974612	7.73	1.24	1.9	5.3	-2.67	1.41	0.67
Co3Y-Y-Co	0.140341289	2.291114343	1.715921965	-1.055900461	3.272987901	1.687362312	6.22	0.31	1.22	3.42	1.95	1.99	1.58
Co3Zr-Zr-Co	0.2647055	0.996794319	2.073573264	-0.574621399	2.545725462	1.724174815	6.63	0.43	1.33	4.35	1.95	1.77	1.41
Co3Nb-Nb-Co	0.424217947	0.029886684	2.346525729	-0.348790613	2.090764185	1.7625551	6.76	0.9	1.6	4.69	1.41	1.62	1.28
Co3Mo-Mo-Co	0.531637712	-0.373703169	2.301277545	0.040090563	2.103098007	2.025932042	7.09	0.75	2.16	5.09	0.35	1.55	1.2
Co3Ru-Ru-Co	0.727144057	-1.43035787	2.148899761	0.253135596	2.633536485	2.046048082	7.36	1.05	2.2	5.73	-1.41	1.48	1.05
Co3Rh-Rh-Co	0.809614365	-1.833921714	2.031205695	0.534073098	3.179919179	2.0857802	7.46	1.14	2.28	5.91	-1.73	1.49	0.99
Co3Pd-Pd-Co	0.924159629	-2.188708011	1.507060186	0.755232191	4.476958215	2.001998657	8.34	0.56	2.2	5.9	-1.83	1.52	0.94
Co3Ag-Ag-Co	0.980510703	-3.648912692	1.029871913	2.299520904	15.16148687	1.892377232	7.58	1.3	1.93	5.01	-4.3	1.59	0.89
Co3Ta-Ta-Co	0.407981771	0.44606469	2.574945734	-0.144678752	1.948168825	1.664764331	7.89	0.32	1.5	4.86	2	1.62	1.34
Co3W-W-Co	0.467093965	-0.190476854	2.603266319	-0.011690238	2.04135585	2.124873904	7.98	0.86	2.36	5.09	0.77	1.56	1.27
Co3Re-Re-Co	0.585898132	-1.011111048	2.630188028	0.085485658	2.199239955	1.890742929	7.88	0.15	1.9	5.88	-0.51	1.52	1.2
Co3Os-Os-Co	0.689181117	-1.760311768	2.620285858	0.174919745	2.421710507	2.046048082	8.7	1.1	2.2	6.25	-1.5	1.49	1.13
Co3Ir-Ir-Co	0.77991809	-2.194154012	2.432717363	0.298253445	2.747422503	2.046048082	9.1	1.57	2.2	6.63	-2.11	1.5	1.08
Co3Pt-Pt-Co	0.886017914	-2.164784366	1.739355952	0.552291387	3.727408617	2.030806984	9	2.13	2.28	6.74	-2.25	1.53	1.04
Ni3Sc-Sc-Ni	0.173889869	1.292188601	1.744298461	-1.095098675	4.15470611	1.667383823	6.56	0.19	1.36	3.84	1.5	1.81	1.24
Ni3Ti-Ti-Ni	0.256962008	0.7087801	1.780024193	-0.706618517	3.6276489	1.752380084	6.83	0.08	1.54	4.63	1.5	1.61	1.08
Ni3V-V-Ni	0.377778377	0.11394555	1.877567334	-0.431172162	3.162260525	1.79264817	6.75	0.53	1.63	4.88	1.06	1.49	0.98
Ni3Cr-Cr-Ni	0.497565116	-0.124140405	2.158049215	-0.173301048	2.297797219	1.805773418	6.77	0.67	1.66	5.27	0.16	1.42	0.9
Ni3Mn-Mn-Ni	0.564194587	-0.627656347	1.877756555	-0.057986002	2.906928609	1.706844696	7.43	0	1.55	5.45	0.07	1.43	0.86
Ni3Fe-Fe-Ni	0.671365802	-1.270912876	1.954168834	0.279960691	2.350516787	1.877588671	7.9	0.15	1.83	5.54	-0.92	1.41	0.8
Ni3Co-Co-Ni	0.771122545	-1.414921268	1.698463388	0.318560398	3.250668202	1.893787149	7.88	0.66	1.88	5.76	-1.17	1.39	0.76
Ni3Ni-Ni-Ni	0.867297501	-1.408296472	1.37488445	0.453899754	4.928466544	1.91	7.64	1.16	1.91	5.77	-1.29	1.38	0.71
Ni3Cu-Cu-Ni	0.969487322	-2.37394238	1.122531283	1.19201218	8.002783876	1.9059937	7.73	1.24	1.9	5.3	-2.67	1.41	0.67
Ni3Y-Y-Ni	0.163647951	1.668284546	1.90344746	-0.866087889	3.378925135	1.614473017	6.22	0.31	1.22	3.42	1.95	1.99	1.58
Ni3Zr-Zr-Ni	0.296923382	0.656078368	2.207827318	-0.632652535	2.531565804	1.652573091	6.63	0.43	1.33	4.35	1.95	1.77	1.41
Ni3Nb-Nb-Ni	0.420520245	-0.08840855	2.336679566	-0.365406968	2.307364843	1.779377167	6.76	0.9	1.6	4.69	1.41	1.62	1.28
Ni3Mo-Mo-Ni	0.515175813	-0.39951609	2.256898516	0.05376566	2.252404295	2.040789398	7.09	0.75	2.16	5.09	0.35	1.55	1.2
Ni3Ru-Ru-Ni	0.732615603	-1.594645997	2.142829791	0.158406966	2.74525125	2.021106006	7.36	1.05	2.2	5.73	-1.41	1.48	1.05
Ni3Rh-Rh-Ni	0.802532874	-1.859447379	2.000568378	0.41972971	3.200596367	2.101076457	7.46	1.14	2.28	5.91	-1.73	1.49	0.99
Ni3Pd-Pd-Ni	0.922133071	-2.193948319	1.611095514	0.678676936	4.152461586	2.021106006	8.34	0.56	2.2	5.9	-1.83	1.52	0.94
Ni3Ag-Ag-Ni	0.975748177	-3.893278344	1.298029006	2.421254003	11.04077128	1.917975009	7.58	1.3	1.93	5.01	-4.3	1.59	0.89
Ni3La-La-Ni	0.108311592	2.579185344	2.092924602	-2.38808764	16.3194604	1.663884579	5.77	0.5	1.1	3.3	2	1.92	1.58
Ni3Ta-Ta-Ni	0.387105363	0.310129874	2.523200633	-0.134953839	2.071280673	1.67697303	7.89	0.32	1.5	4.86	2	1.62	1.34
Ni3W-W-Ni	0.481895053	-0.247273667	2.544765968	-0.0070842	2.15210678	2.140456858	7.98	0.86	2.36	5.09	0.77	1.56	1.27
Ni3Re-Re-Ni	0.586338768	-1.012181594	2.576060291	0.07211102	2.271534354	1.904608862	7.88	0.15	1.9	5.88	-0.51	1.52	1.2
Ni3Os-Os-Ni	0.703594409	-1.920861627	2.691589478	0.104769444	2.363464248	2.021106006	8.7	1.1	2.2	6.25	-1.5	1.49	1.13
Ni3Ir-Ir-Ni	0.785684217	-2.192757956	2.375498672	0.287374177	2.875302117	2.06105296	9.1	1.57	2.2	6.63	-2.11	1.5	1.08
Ni3Pt-Pt-Ni	0.892126283	-2.310910372	1.923504344	0.480735631	3.492868696	2.050189284	9	2.13	2.28	6.74	-2.25	1.53	1.04
Cu3Sc-Sc-Cu	0.162669776	1.036236235	1.675474263	-1.228318417	5.593854277	1.66214047	6.56	0.19	1.36	3.84	1.5	1.81	1.24
Cu3Ti-Ti-Cu	0.256391227	0.649718866	1.742713904	-0.670439021	4.553154563	1.746869447	6.83	0.08	1.54	4.63	1.5	1.61	1.08
Cu3V-V-Cu	0.397136954	0.467390132	2.026078181	-0.416714735	3.008434352	1.787010903	6.75	0.53	1.63	4.88	1.06	1.49	0.98
Cu3Mn-Mn-Cu	0.549875778	-0.906278523	2.332853709	0.137500474	1.870408933	1.751397961	7.43	0	1.55	5.45	0.07	1.43	0.86
Cu3Fe-Fe-Cu	0.67525988	-1.098594807	1.902203915	0.21346101	2.573931624	1.871684296	7.9	0.15	1.83	5.54	-0.92	1.41	0.8
Cu3Co-Co-Cu	0.771951251	-1.356439777	1.632014544	0.278575634	3.323039212	1.89088285	7.88	0.66	1.88	5.76	-1.17	1.39	0.76
Cu3Ni-Ni-Cu	0.888231432	-1.049650596	1.248538556	0.277909348	5.744552658	1.903993702	7.64	1.16	1.91	5.77	-1.29	1.38	0.71
Cu3Cu-Cu-Cu	0.97221817	-2.382838709	1.049717075	1.120571636	9.924695117	1.9	7.73	1.24	1.9	5.3	-2.67	1.41	0.67
Cu3Y-Y-Cu	0.162609513	1.233323987	1.920081989	-0.983960012	4.373214164	1.783482189	6.22	0.31	1.22	3.42	1.95	1.99	1.58
Cu3Zr-Zr-Cu	0.286758326	0.51414215	2.062601673	-0.822016976	3.716848382	1.647376312	6.63	0.43	1.33	4.35	1.95	1.77	1.41
Cu3Nb-Nb-Cu	0.41835675	0.000170897	2.196938744	-0.499255449	3.198920347	1.773781633	6.76	0.9	1.6	4.69	1.41	1.62	1.28
Cu3Mo-Mo-Cu	0.527383513	-0.356738622	2.428502568	-0.085000125	2.382401959	2.035850999	7.09	0.75	2.16	5.09	0.35	1.55	1.2
Cu3Ru-Ru-Cu	0.728120343	-1.377383502	2.095923273	0.105850995	2.771772394	2.014750318	7.36	1.05	2.2	5.73	-1.41	1.48	1.05
Cu3Rh-Rh-Cu	0.813609061	-1.57044553	1.871099629	0.305403391	3.391760974	2.043742138	7.46	1.14	2.28	5.91	-1.73	1.49	0.99
Cu3Pd-Pd-Cu	0.937129912	-1.942420342	1.518268204	0.484321549	4.468475946	2.014750318	8.34	0.56	2.2	5.9	-1.83	1.52	0.94
Cu3Ag-Ag-Cu	0.976016335	-4.219316491	1.272089132	2.310981215	12.14722313	1.911943632	7.58	1.3	1.93	5.01	-4.3	1.59	0.89
Cu3La-La-Cu	0.130792636	1.837321119	1.955526215	-0.970383459	3.727617854	1.774530574	5.77	0.5	1.1	3.3	2	1.92	1.58
Cu3Ta-Ta-Cu	0.378883692	0.360418768	2.437682875	-0.16537985	2.402587242	1.672915012	7.89	0.32	1.5	4.86	2	1.62	1.34
Cu3W-W-Cu	0.480153673	-0.215739569	2.486727632	-0.073063966	2.28416431	2.13527728	7.98	0.86	2.36	5.09	0.77	1.56	1.27
Cu3Re-Re-Cu	0.654465617	-1.079349979	2.502733306	-0.138976455	2.196056557	1.9	7.88	0.15	1.9	5.88	-0.51	1.52	1.2
Cu3Os-Os-Cu	0.704409552	-1.711056572	2.625981401	0.08721055	2.28500637	2.014750318	8.7	1.1	2.2	6.25	-1.5	1.49	1.13
Cu3Ir-Ir-Cu	0.793574635	-2.001934099	2.279162617	0.170855351	2.796322982	2.014750318	9.1	1.57	2.2	6.63	-2.11	1.5	1.08
Cu3Pt-Pt-Cu	0.893605272	-2.032387531	1.868869279	0.334027618	3.624749907	2.043742138	9	2.13	2.28	6.74	-2.25	1.53	1.04
Cu3Au-Au-Cu	0.964081523	-3.591763952	1.516087821	1.663944684	7.755976621	2.221482488	9.23	2.31	2.54	6.01	-3.56	1.59	1.01
Ru3Sc-Sc-Ru	0.173581828	1.455539977	1.653739827	-1.292570099	4.065948111	1.814968834	6.56	0.19	1.36	3.84	1.5	1.81	1.24
Ru3Ti-Ti-Ru	0.230355362	0.889754965	1.73307072	-0.691400427	3.436383124	1.907488362	6.83	0.08	1.54	4.63	1.5	1.61	1.08
Ru3V-V-Ru	0.363789044	0.549986011	1.897025805	-0.483428858	2.778030304	1.951320694	6.75	0.53	1.63	4.88	1.06	1.49	0.98
Ru3Mn-Mn-Ru	0.550390173	-0.508696323	1.757327057	-0.153939431	2.985370786	1.912433258	7.43	0	1.55	5.45	0.07	1.43	0.86
Ru3Fe-Fe-Ru	0.655769206	-1.129046225	1.914072665	0.226329265	2.142708172	2.043779527	7.9	0.15	1.83	5.54	-0.92	1.41	0.8
Ru3Co-Co-Ru	0.768312831	-1.280445264	1.603183709	0.283912359	3.159554385	2.065935451	7.88	0.66	1.88	5.76	-1.17	1.39	0.76
Ru3Ni-Ni-Ru	0.876362916	-1.184134999	1.245837817	0.379066379	5.338346113	2.079059677	7.64	1.16	1.91	5.77	-1.29	1.38	0.71
Ru3Cu-Cu-Ru	0.964096211	-2.160361896	1.050590755	1.163859717	8.112574789	2.074698767	7.73	1.24	1.9	5.3	-2.67	1.41	0.67
Ru3Y-Y-Ru	0.202076715	1.705543081	1.987554096	-1.049131124	3.100977486	2.022284595	6.22	0.31	1.22	3.42	1.95	1.99	1.58
Ru3Zr-Zr-Ru	0.26173592	1.077371234	2.222150283	-0.624603461	2.473855198	1.79884716	6.63	0.43	1.33	4.35	1.95	1.77	1.41
Ru3Nb-Nb-Ru	0.388158302	0.312141531	2.270382659	-0.361631377	2.256648152	1.936875036	6.76	0.9	1.6	4.69	1.41	1.62	1.28
Ru3Mo-Mo-Ru	0.504129269	-0.201610076	2.383088775	-0.189600082	2.112630185	2.183911871	7.09	0.75	2.16	5.09	0.35	1.55	1.2
Ru3Ru-Ru-Ru	0.705861118	-1.411098398	2.078006787	0.106605877	2.47241557	2.2	7.36	1.05	2.2	5.73	-1.41	1.48	1.05
Ru3Rh-Rh-Ru	0.800330626	-1.681142929	1.898256065	0.307581259	2.980522562	2.231657523	7.46	1.14	2.28	5.91	-1.73	1.49	0.99
Ru3Pd-Pd-Ru	0.907643137	-2.166235199	1.597420199	0.638609463	3.809693546	2.2	8.34	0.56	2.2	5.9	-1.83	1.52	0.94
Ru3Ag-Ag-Ru	0.96668479	-3.761501167	1.401669907	2.057672643	8.698365534	2.087740577	7.58	1.3	1.93	5.01	-4.3	1.59	0.89
Ru3La-La-Ru	0.163427239	2.102572924	2.019477463	-0.851797915	2.901183043	1.746141157	5.77	0.5	1.1	3.3	2	1.92	1.58
Ru3Ta-Ta-Ru	0.35054589	0.542532804	2.482528065	-0.436793837	2.243145841	1.887513698	7.89	0.32	1.5	4.86	2	1.62	1.34
Ru3W-W-Ru	0.459810576	-0.045072317	2.615855915	-0.234739321	2.092816787	2.262655365	7.98	0.86	2.36	5.09	0.77	1.56	1.27
Ru3Re-Re-Ru	0.579967191	-0.918528407	2.75473402	-0.08179744	2.00300151	2.074698767	7.88	0.15	1.9	5.88	-0.51	1.52	1.2
Ru3Os-Os-Ru	0.674908239	-1.649901517	2.580426503	0.039190466	2.175635197	2.2	8.7	1.1	2.2	6.25	-1.5	1.49	1.13
Ru3Ir-Ir-Ru	0.768577341	-2.003778873	2.291948738	0.189330202	2.583137622	2.2	9.1	1.57	2.2	6.63	-2.11	1.5	1.08
Ru3Pt-Pt-Ru	0.870405173	-2.290789602	1.93789992	0.461738941	3.254618205	2.231657523	9	2.13	2.28	6.74	-2.25	1.53	1.04
Ru3Au-Au-Ru	0.950451093	-3.427030551	1.631470447	1.368831808	5.619260855	2.330167256	9.23	2.31	2.54	6.01	-3.56	1.59	1.01
Rh3Sc-Sc-Rh	0.158249929	1.421440843	1.77453277	-1.131892519	4.161201914	1.854284942	6.56	0.19	1.36	3.84	1.5	1.81	1.24
Rh3Ti-Ti-Rh	0.22795108	0.755876629	1.720233754	-0.804906106	3.914102543	1.948808641	6.83	0.08	1.54	4.63	1.5	1.61	1.08
Rh3V-V-Rh	0.366905807	0.456309203	1.937111714	-0.528226768	2.940515763	1.993590475	6.75	0.53	1.63	4.88	1.06	1.49	0.98
Rh3Mn-Mn-Rh	0.553396635	-0.578826146	1.759087714	-0.196551577	3.099198048	1.953860655	7.43	0	1.55	5.45	0.07	1.43	0.86
Rh3Fe-Fe-Rh	0.651695501	-1.182116974	1.950208187	0.223735632	2.11955007	2.088052164	7.9	0.15	1.83	5.54	-0.92	1.41	0.8
Rh3Co-Co-Rh	0.758571784	-1.341447726	1.648172186	0.268360436	3.067847215	2.110688033	7.88	0.66	1.88	5.76	-1.17	1.39	0.76
Rh3Ni-Ni-Rh	0.863252901	-1.255220896	1.279105825	0.363667222	5.128063518	2.124096558	7.64	1.16	1.91	5.77	-1.29	1.38	0.71
Rh3Cu-Cu-Rh	0.964226098	-1.994694959	1.037133434	0.988258058	8.016858895	2.119641181	7.73	1.24	1.9	5.3	-2.67	1.41	0.67
Rh3Y-Y-Rh	0.162333483	1.754426806	2.069454172	-1.057348811	3.325506603	2.085155347	6.22	0.31	1.22	3.42	1.95	1.99	1.58
Rh3Zr-Zr-Rh	0.257012235	0.887157814	2.214461315	-0.709294087	2.665588274	1.837814038	6.63	0.43	1.33	4.35	1.95	1.77	1.41
Rh3Nb-Nb-Rh	0.386980768	0.226915945	2.310965526	-0.452646403	2.393822407	1.978831893	6.76	0.9	1.6	4.69	1.41	1.62	1.28
Rh3Mo-Mo-Rh	0.496626818	-0.307599402	2.423017939	-0.257628312	2.191793224	2.231220074	7.09	0.75	2.16	5.09	0.35	1.55	1.2
Rh3Ru-Ru-Rh	0.707731729	-1.405830864	2.058172801	0.046147726	2.58650875	2.247656707	7.36	1.05	2.2	5.73	-1.41	1.48	1.05
Rh3Rh-Rh-Rh	0.786754586	-1.673940746	1.875387937	0.253972996	3.111637787	2.28	7.46	1.14	2.28	5.91	-1.73	1.49	0.99
Rh3Pd-Pd-Rh	0.911592845	-2.071490639	1.572409657	0.547397616	3.860413966	2.247656707	8.34	0.56	2.2	5.9	-1.83	1.52	0.94
Rh3Ag-Ag-Rh	0.968041939	-3.702013574	1.378688012	1.99140501	8.768990539	2.132965504	7.58	1.3	1.93	5.01	-4.3	1.59	0.89
Rh3La-La-Rh	0.17060326	1.930663805	2.188288317	-0.888536209	2.720112764	2.054539703	5.77	0.5	1.1	3.3	2	1.92	1.58
Rh3Ta-Ta-Rh	0.35677348	0.389744262	2.498458455	-0.514451018	2.372464498	1.928401283	7.89	0.32	1.5	4.86	2	1.62	1.34
Rh3W-W-Rh	0.461952676	-0.217780988	2.654782329	-0.290979798	2.159851188	2.311669321	7.98	0.86	2.36	5.09	0.77	1.56	1.27
Rh3Re-Re-Rh	0.57969908	-1.080655096	2.73045663	-0.109950679	2.064906874	2.119641181	7.88	0.15	1.9	5.88	-0.51	1.52	1.2
Rh3Os-Os-Rh	0.681415478	-1.704852799	2.574030747	0.005530002	2.227999296	2.247656707	8.7	1.1	2.2	6.25	-1.5	1.49	1.13
Rh3Ir-Ir-Rh	0.771709799	-2.043002979	2.268528055	0.145410481	2.655490621	2.247656707	9.1	1.57	2.2	6.63	-2.11	1.5	1.08
Rh3Pt-Pt-Rh	0.873836876	-2.248092301	1.916404544	0.393260208	3.282442741	2.28	9	2.13	2.28	6.74	-2.25	1.53	1.04
Rh3Au-Au-Rh	0.95163452	-3.300642018	1.592048592	1.287522501	5.600833731	2.380643664	9.23	2.31	2.54	6.01	-3.56	1.59	1.01
Pd3Sc-Sc-Pd	0.152947528	1.056105274	1.67554423	-1.29314127	5.366807908	1.814968834	6.56	0.19	1.36	3.84	1.5	1.81	1.24
Pd3Ti-Ti-Pd	0.234011264	0.711978542	1.671634256	-0.803234302	4.625027862	1.907488362	6.83	0.08	1.54	4.63	1.5	1.61	1.08
Pd3V-V-Pd	0.378270498	0.453670024	1.910178552	-0.504394076	3.048493371	1.951320694	6.75	0.53	1.63	4.88	1.06	1.49	0.98
Pd3Cr-Cr-Pd	0.476304519	0.244148713	2.185899224	-0.167824781	2.12645043	1.965607695	6.77	0.67	1.66	5.27	0.16	1.42	0.9
Pd3Mn-Mn-Pd	0.560952702	-0.708675145	1.756659686	-0.123141024	3.092631993	1.912433258	7.43	0	1.55	5.45	0.07	1.43	0.86
Pd3Fe-Fe-Pd	0.668477355	-1.117541023	1.910694422	0.191886977	2.260552011	2.043779527	7.9	0.15	1.83	5.54	-0.92	1.41	0.8
Pd3Co-Co-Pd	0.764246051	-1.469709709	1.615474399	0.273242497	3.077900229	2.065935451	7.88	0.66	1.88	5.76	-1.17	1.39	0.76
Pd3Ni-Ni-Pd	0.871833672	-1.214657455	1.220896364	0.33788183	5.389328631	2.079059677	7.64	1.16	1.91	5.77	-1.29	1.38	0.71
Pd3Cu-Cu-Pd	0.973423545	-1.799806972	0.964420022	0.81487481	8.498313921	2.074698767	7.73	1.24	1.9	5.3	-2.67	1.41	0.67
Pd3Y-Y-Pd	0.153322401	1.424209635	2.008927366	-1.209662973	4.102861012	2.022284595	6.22	0.31	1.22	3.42	1.95	1.99	1.58
Pd3Zr-Zr-Pd	0.264289971	0.743763394	2.134261328	-0.874894052	3.399603458	1.79884716	6.63	0.43	1.33	4.35	1.95	1.77	1.41
Pd3Nb-Nb-Pd	0.388259994	0.152611046	2.25367471	-0.48871296	2.757735919	1.936875036	6.76	0.9	1.6	4.69	1.41	1.62	1.28
Pd3Mo-Mo-Pd	0.505130967	-0.3014899	2.387425413	-0.241715537	2.269694822	2.183911871	7.09	0.75	2.16	5.09	0.35	1.55	1.2
Pd3Ru-Ru-Pd	0.709760254	-1.362974907	1.935310921	-0.00847965	2.657524313	2.2	7.36	1.05	2.2	5.73	-1.41	1.48	1.05
Pd3Rh-Rh-Pd	0.793260988	-1.509099446	1.746865344	0.222416701	3.268282645	2.231657523	7.46	1.14	2.28	5.91	-1.73	1.49	0.99
Pd3Pd-Pd-Pd	0.918587461	-1.716239369	1.42629282	0.393509213	3.988079194	2.2	8.34	0.56	2.2	5.9	-1.83	1.52	0.94
Pd3Ag-Ag-Pd	0.977751823	-3.481793139	1.22102462	1.983282376	9.823572511	2.087740577	7.58	1.3	1.93	5.01	-4.3	1.59	0.89
Pd3La-La-Pd	0.166222749	1.22391197	2.129573178	-0.965605751	3.435948196	1.992592061	5.77	0.5	1.1	3.3	2	1.92	1.58
Pd3Ta-Ta-Pd	0.358912259	0.276961667	2.429742409	-0.53578729	2.6992109	1.887513698	7.89	0.32	1.5	4.86	2	1.62	1.34
Pd3W-W-Pd	0.476570973	-0.198542537	2.625355247	-0.284787246	2.225418809	2.262655365	7.98	0.86	2.36	5.09	0.77	1.56	1.27
Pd3Re-Re-Pd	0.586054122	-1.150971593	2.701807872	-0.098053373	2.022266484	2.074698767	7.88	0.15	1.9	5.88	-0.51	1.52	1.2
Pd3Os-Os-Pd	0.679357513	-1.723854174	2.475365052	-0.006426823	2.193733606	2.2	8.7	1.1	2.2	6.25	-1.5	1.49	1.13
Pd3Ir-Ir-Pd	0.77792559	-1.876833229	2.144890441	0.081412659	2.700227791	2.2	9.1	1.57	2.2	6.63	-2.11	1.5	1.08
Pd3Pt-Pt-Pd	0.880958666	-2.014960402	1.790447016	0.30144078	3.351834664	2.231657523	9	2.13	2.28	6.74	-2.25	1.53	1.04
Pd3Au-Au-Pd	0.965722179	-3.062110964	1.472136723	1.113855232	5.650377021	2.330167256	9.23	2.31	2.54	6.01	-3.56	1.59	1.01
Ag3Sc-Sc-Ag	0.164682478	0.940409666	1.634884614	-1.343482311	7.168696374	1.677837701	6.56	0.19	1.36	3.84	1.5	1.81	1.24
Ag3Ti-Ti-Ag	0.261951034	0.889977376	1.657035231	-0.717625966	4.867030639	1.763366857	6.83	0.08	1.54	4.63	1.5	1.61	1.08
Ag3V-V-Ag	0.401227108	0.732053308	1.950879855	-0.503012377	3.053078403	1.803887409	6.75	0.53	1.63	4.88	1.06	1.49	0.98
Ag3Cr-Cr-Ag	0.494763697	0.692784091	2.206696967	-0.114934568	2.255018193	1.817094947	6.77	0.67	1.66	5.27	0.16	1.42	0.9
Ag3Mn-Mn-Ag	0.547503969	-0.82868399	2.350738283	0.167986959	1.844937536	1.767938139	7.43	0	1.55	5.45	0.07	1.43	0.86
Ag3Fe-Fe-Ag	0.681573248	-0.989559584	1.854474799	0.216068025	2.631535829	1.889360456	7.9	0.15	1.83	5.54	-0.92	1.41	0.8
Ag3Co-Co-Ag	0.767369366	-1.450664869	1.585275694	0.367956128	3.475893101	1.909842375	7.88	0.66	1.88	5.76	-1.17	1.39	0.76
Ag3Ni-Ni-Ag	0.881181033	-1.038901469	1.173218516	0.383856454	6.739132749	1.921974991	7.64	1.16	1.91	5.77	-1.29	1.38	0.71
Ag3Cu-Cu-Ag	0.978631146	-2.129909089	0.926774491	1.049520859	13.5648018	1.917943573	7.73	1.24	1.9	5.3	-2.67	1.41	0.67
Ag3Y-Y-Ag	0.168080974	1.094188976	1.923282757	-1.357356789	6.029378994	1.807592482	6.22	0.31	1.22	3.42	1.95	1.99	1.58
Ag3Zr-Zr-Ag	0.276774476	0.674940795	2.11084924	-0.77010446	4.30153426	1.662934111	6.63	0.43	1.33	4.35	1.95	1.77	1.41
Ag3Nb-Nb-Ag	0.437853908	0.56367163	2.387465105	-0.390741628	2.694335333	1.790533202	6.76	0.9	1.6	4.69	1.41	1.62	1.28
Ag3Mo-Mo-Ag	0.522808491	-0.209405928	2.468607637	-0.155897597	2.142677328	2.018905011	7.09	0.75	2.16	5.09	0.35	1.55	1.2
Ag3Ru-Ru-Ag	0.711243188	-1.481760314	1.947985504	0.123940078	2.546029538	2.033777591	7.36	1.05	2.2	5.73	-1.41	1.48	1.05
Ag3Rh-Rh-Ag	0.80566842	-1.37471275	1.658060631	0.220839688	3.57672858	2.06304321	7.46	1.14	2.28	5.91	-1.73	1.49	0.99
Ag3Pd-Pd-Ag	0.941416286	-1.457262991	1.287083015	0.140922301	5.646473861	2.033777591	8.34	0.56	2.2	5.9	-1.83	1.52	0.94
Ag3Ag-Ag-Ag	0.979922293	-3.975985813	1.130779629	2.415927521	16.56689079	1.93	7.58	1.3	1.93	5.01	-4.3	1.59	0.89
Ag3La-La-Ag	0.185467565	0.983586574	1.956422955	-1.212482797	5.37680669	1.781052201	5.77	0.5	1.1	3.3	2	1.92	1.58
Ag3Ta-Ta-Ag	0.417987866	0.577778427	2.478748136	-0.460088141	2.783238194	1.744901392	7.89	0.32	1.5	4.86	2	1.62	1.34
Ag3W-W-Ag	0.506597702	-0.041750531	2.671161944	-0.21568314	2.155889063	2.091698989	7.98	0.86	2.36	5.09	0.77	1.56	1.27
Ag3Re-Re-Ag	0.629431541	-1.288135402	2.571627411	-0.003972904	1.775943324	1.917943573	7.88	0.15	1.9	5.88	-0.51	1.52	1.2
Ag3Os-Os-Ag	0.691432649	-1.800028045	2.535737237	0.165336199	2.003282291	2.033777591	8.7	1.1	2.2	6.25	-1.5	1.49	1.13
Ag3Ir-Ir-Ag	0.787354797	-1.844473378	2.1000986	0.130496609	2.608994091	2.033777591	9.1	1.57	2.2	6.63	-2.11	1.5	1.08
Ag3Pt-Pt-Ag	0.911565542	-1.643666233	1.644532689	0.130406951	4.027099535	2.06304321	9	2.13	2.28	6.74	-2.25	1.53	1.04
Ag3Au-Au-Ag	0.973767375	-3.3967048	1.376970802	1.227325141	8.423464127	2.154109976	9.23	2.31	2.54	6.01	-3.56	1.59	1.01
Os3Sc-Sc-Os	0.163711087	1.652191685	1.949158944	-1.219314057	4.32780377	2.053913464	6.56	0.19	1.36	3.84	1.5	1.81	1.24
Os3Ti-Ti-Os	0.235057784	0.931825581	1.910555725	-0.795155787	3.6558705	1.907488362	6.83	0.08	1.54	4.63	1.5	1.61	1.08
Os3V-V-Os	0.371461335	0.471394221	2.006874999	-0.577928261	3.13883878	1.951320694	6.75	0.53	1.63	4.88	1.06	1.49	0.98
Os3Cr-Cr-Os	0.498865371	-0.074015345	1.98916325	-0.479580256	3.019336576	1.965607695	6.77	0.67	1.66	5.27	0.16	1.42	0.9
Os3Mn-Mn-Os	0.54716272	-0.452828803	1.839931058	-0.262333009	3.229814368	1.912433258	7.43	0	1.55	5.45	0.07	1.43	0.86
Os3Fe-Fe-Os	0.661001621	-1.045447587	1.948676348	0.129242911	2.373034086	2.043779527	7.9	0.15	1.83	5.54	-0.92	1.41	0.8
Os3Co-Co-Os	0.760262191	-1.236250908	1.65405431	0.154079365	3.412783479	2.065935451	7.88	0.66	1.88	5.76	-1.17	1.39	0.76
Os3Ni-Ni-Os	0.870602775	-1.196400596	1.326880912	0.151247417	5.431057239	2.079059677	7.64	1.16	1.91	5.77	-1.29	1.38	0.71
Os3Cu-Cu-Os	0.962058122	-2.347527041	1.152757544	0.934165643	7.48444016	2.074698767	7.73	1.24	1.9	5.3	-2.67	1.41	0.67
Os3Y-Y-Os	0.17398143	1.92708345	2.297460221	-1.077004099	3.394111398	2.022284595	6.22	0.31	1.22	3.42	1.95	1.99	1.58
Os3Zr-Zr-Os	0.269104372	1.036413139	2.427533178	-0.701143496	2.693399458	2.04737901	6.63	0.43	1.33	4.35	1.95	1.77	1.41
Os3Nb-Nb-Os	0.389230165	0.321244999	2.517428647	-0.442211274	2.39649112	1.936875036	6.76	0.9	1.6	4.69	1.41	1.62	1.28
Os3Mo-Mo-Os	0.505549686	-0.23149613	2.564031964	-0.26313625	2.267508834	2.183911871	7.09	0.75	2.16	5.09	0.35	1.55	1.2
Os3Ru-Ru-Os	0.709018027	-1.451374809	2.25483718	0.037304595	2.584502651	2.2	7.36	1.05	2.2	5.73	-1.41	1.48	1.05
Os3Rh-Rh-Os	0.787715977	-1.688666674	2.053613253	0.209726864	3.011492339	2.231657523	7.46	1.14	2.28	5.91	-1.73	1.49	0.99
Os3Pd-Pd-Os	0.903898538	-2.326403944	1.756561777	0.529044148	3.715287306	2.2	8.34	0.56	2.2	5.9	-1.83	1.52	0.94
Os3Ag-Ag-Os	0.964249852	-3.942249051	1.522427928	1.816940386	7.570588291	2.087740577	7.58	1.3	1.93	5.01	-4.3	1.59	0.89
Os3La-La-Os	0.179998716	1.835134268	2.310486178	-0.904976102	2.91500437	1.992592061	5.77	0.5	1.1	3.3	2	1.92	1.58
Os3Ta-Ta-Os	0.362191956	0.473873194	2.730701723	-0.492411843	2.341095139	1.887513698	7.89	0.32	1.5	4.86	2	1.62	1.34
Os3W-W-Os	0.470891583	-0.131361664	2.822185699	-0.274069344	2.176634595	2.262655365	7.98	0.86	2.36	5.09	0.77	1.56	1.27
Os3Re-Re-Os	0.585487154	-1.007656218	2.920671562	-0.099870375	2.094089221	2.074698767	7.88	0.15	1.9	5.88	-0.51	1.52	1.2
Os3Os-Os-Os	0.678117548	-1.667391463	2.736825971	0.027647933	2.256215587	2.2	8.7	1.1	2.2	6.25	-1.5	1.49	1.13
Os3Ir-Ir-Os	0.768330266	-2.055025435	2.463694475	0.168793793	2.605132697	2.2	9.1	1.57	2.2	6.63	-2.11	1.5	1.08
Os3Pt-Pt-Os	0.86721387	-2.408386268	2.096935405	0.395725302	3.179789025	2.231657523	9	2.13	2.28	6.74	-2.25	1.53	1.04
Os3Au-Au-Os	0.945953065	-3.693407031	1.822860963	1.22303443	5.058340922	2.330167256	9.23	2.31	2.54	6.01	-3.56	1.59	1.01
Ir3Sc-Sc-Ir	0.163331122	1.479581836	1.970661511	-1.28402965	4.565364837	1.814968834	6.56	0.19	1.36	3.84	1.5	1.81	1.24
Ir3Ti-Ti-Ir	0.229253918	0.816577446	1.84843259	-0.952071034	4.274824956	1.907488362	6.83	0.08	1.54	4.63	1.5	1.61	1.08
Ir3V-V-Ir	0.368368958	0.437286749	2.002742406	-0.69341803	3.400694758	1.951320694	6.75	0.53	1.63	4.88	1.06	1.49	0.98
Ir3Mn-Mn-Ir	0.530827503	-0.484448317	2.396517947	0.013861197	1.836907789	1.912433258	7.43	0	1.55	5.45	0.07	1.43	0.86
Ir3Fe-Fe-Ir	0.654262717	-1.16691078	1.976702051	0.126054408	2.265934645	2.043779527	7.9	0.15	1.83	5.54	-0.92	1.41	0.8
Ir3Co-Co-Ir	0.759076485	-1.289298344	1.662818242	0.114309947	3.283224873	2.065935451	7.88	0.66	1.88	5.76	-1.17	1.39	0.76
Ir3Ni-Ni-Ir	0.862635609	-1.177554679	1.296321857	0.058879548	5.613742413	2.079059677	7.64	1.16	1.91	5.77	-1.29	1.38	0.71
Ir3Cu-Cu-Ir	0.962852201	-2.210284702	1.100347274	0.731917523	7.674649461	2.074698767	7.73	1.24	1.9	5.3	-2.67	1.41	0.67
Ir3Y-Y-Ir	0.1717931	1.751676627	2.37141562	-1.125297194	3.447868213	2.022284595	6.22	0.31	1.22	3.42	1.95	1.99	1.58
Ir3Zr-Zr-Ir	0.261307396	0.928481227	2.426768418	-0.808098269	2.867339837	1.79884716	6.63	0.43	1.33	4.35	1.95	1.77	1.41
Ir3Nb-Nb-Ir	0.38809873	0.225897856	2.475741592	-0.571147702	2.591932536	1.936875036	6.76	0.9	1.6	4.69	1.41	1.62	1.28
Ir3Mo-Mo-Ir	0.494102075	-0.336534887	2.529691774	-0.380142948	2.386259378	2.183911871	7.09	0.75	2.16	5.09	0.35	1.55	1.2
Ir3Ru-Ru-Ir	0.707315535	-1.419530783	2.173499982	-0.072149387	2.661289809	2.2	7.36	1.05	2.2	5.73	-1.41	1.48	1.05
Ir3Rh-Rh-Ir	0.788818743	-1.720390646	1.982683795	0.111652506	3.097548795	2.231657523	7.46	1.14	2.28	5.91	-1.73	1.49	0.99
Ir3Pd-Pd-Ir	0.906533713	-2.183721999	1.695792532	0.351786093	3.664638967	2.2	8.34	0.56	2.2	5.9	-1.83	1.52	0.94
Ir3Ag-Ag-Ir	0.964490292	-3.79524764	1.472714566	1.673237786	7.386597485	2.087740577	7.58	1.3	1.93	5.01	-4.3	1.59	0.89
Ir3La-La-Ir	0.178500742	1.761965999	2.414448036	-0.953394116	2.9450375	1.992592061	5.77	0.5	1.1	3.3	2	1.92	1.58
Ir3Ta-Ta-Ir	0.358369892	0.37701777	2.676498964	-0.602548987	2.539429462	1.887513698	7.89	0.32	1.5	4.86	2	1.62	1.34
Ir3W-W-Ir	0.463147613	-0.278941499	2.772345279	-0.379100784	2.309909271	2.262655365	7.98	0.86	2.36	5.09	0.77	1.56	1.27
Ir3Re-Re-Ir	0.578626993	-1.086775781	2.833047858	-0.180094664	2.174637898	2.074698767	7.88	0.15	1.9	5.88	-0.51	1.52	1.2
Ir3Os-Os-Ir	0.679988953	-1.698267628	2.688239109	-0.050774572	2.267366468	2.2	8.7	1.1	2.2	6.25	-1.5	1.49	1.13
Ir3Ir-Ir-Ir	0.768099385	-2.103128983	2.400119028	0.078844082	2.620225724	2.2	9.1	1.57	2.2	6.63	-2.11	1.5	1.08
Ir3Pt-Pt-Ir	0.868474545	-2.329220378	2.044432038	0.260504834	3.134979339	2.231657523	9	2.13	2.28	6.74	-2.25	1.53	1.04
Ir3Au-Au-Ir	0.946821819	-3.545711617	1.761988807	1.073078386	4.868541652	2.330167256	9.23	2.31	2.54	6.01	-3.56	1.59	1.01
Pt3Sc-Sc-Pt	0.170343794	1.122650746	1.896338493	-1.504569992	5.556594676	1.854284942	6.56	0.19	1.36	3.84	1.5	1.81	1.24
Pt3Ti-Ti-Pt	0.239169025	0.689880872	1.755174646	-1.073368895	5.211319241	1.948808641	6.83	0.08	1.54	4.63	1.5	1.61	1.08
Pt3V-V-Pt	0.37627617	0.451506964	1.991446562	-0.700332525	3.561033968	1.993590475	6.75	0.53	1.63	4.88	1.06	1.49	0.98
Pt3Cr-Cr-Pt	0.486613161	0.172370776	2.257069356	-0.281125305	2.398533647	2.008186963	6.77	0.67	1.66	5.27	0.16	1.42	0.9
Pt3Mn-Mn-Pt	0.531675272	-0.537465564	2.423926009	0.053929143	1.771449054	1.953860655	7.43	0	1.55	5.45	0.07	1.43	0.86
Pt3Fe-Fe-Pt	0.666578818	-1.175382137	1.953986785	0.118189362	2.290872318	2.088052164	7.9	0.15	1.83	5.54	-0.92	1.41	0.8
Pt3Co-Co-Pt	0.765188608	-1.422345309	1.654968922	0.128684144	3.175738347	2.110688033	7.88	0.66	1.88	5.76	-1.17	1.39	0.76
Pt3Ni-Ni-Pt	0.867517206	-1.175906032	1.252617571	0.061234475	5.650568388	2.124096558	7.64	1.16	1.91	5.77	-1.29	1.38	0.71
Pt3Cu-Cu-Pt	0.972573605	-1.958044332	1.021286191	0.528248639	8.186133815	2.119641181	7.73	1.24	1.9	5.3	-2.67	1.41	0.67
Pt3Y-Y-Pt	0.180873328	1.432237301	2.300471506	-1.276088879	4.018247303	2.085155347	6.22	0.31	1.22	3.42	1.95	1.99	1.58
Pt3Zr-Zr-Pt	0.285246687	0.665189993	2.355495824	-0.970372693	3.474667373	1.837814038	6.63	0.43	1.33	4.35	1.95	1.77	1.41
Pt3Nb-Nb-Pt	0.401804656	0.01686715	2.419792282	-0.627516836	2.970291307	1.978831893	6.76	0.9	1.6	4.69	1.41	1.62	1.28
Pt3Mo-Mo-Pt	0.514228043	-0.358756269	2.507218478	-0.382597001	2.517737194	2.231220074	7.09	0.75	2.16	5.09	0.35	1.55	1.2
Pt3Ru-Ru-Pt	0.712167358	-1.374954847	2.023915445	-0.133209197	2.878471769	2.247656707	7.36	1.05	2.2	5.73	-1.41	1.48	1.05
Pt3Rh-Rh-Pt	0.79620669	-1.548457928	1.829924826	0.053441849	3.369813366	2.28	7.46	1.14	2.28	5.91	-1.73	1.49	0.99
Pt3Pd-Pd-Pt	0.913641889	-1.805507492	1.535813572	0.194922952	3.943682113	2.247656707	8.34	0.56	2.2	5.9	-1.83	1.52	0.94
Pt3Ag-Ag-Pt	0.976051378	-3.552886175	1.317526863	1.645611275	8.112086251	2.132965504	7.58	1.3	1.93	5.01	-4.3	1.59	0.89
Pt3La-La-Pt	0.199088084	1.26646645	2.404472878	-1.052757731	3.379565323	2.054539703	5.77	0.5	1.1	3.3	2	1.92	1.58
Pt3Ta-Ta-Pt	0.378850809	0.139068171	2.611492146	-0.648690764	2.857913968	1.928401283	7.89	0.32	1.5	4.86	2	1.62	1.34
Pt3W-W-Pt	0.490850127	-0.267357781	2.75512411	-0.385381118	2.421376008	2.311669321	7.98	0.86	2.36	5.09	0.77	1.56	1.27
Pt3Re-Re-Pt	0.661239148	-1.559168383	2.519742535	-0.343542155	2.056859098	2.119641181	7.88	0.15	1.9	5.88	-0.51	1.52	1.2
Pt3Os-Os-Pt	0.688535878	-1.718662075	2.549964057	-0.103420359	2.351445385	2.247656707	8.7	1.1	2.2	6.25	-1.5	1.49	1.13
Pt3Ir-Ir-Pt	0.783188375	-1.946211629	2.229969086	0.012338239	2.737645773	2.247656707	9.1	1.57	2.2	6.63	-2.11	1.5	1.08
Pt3Pt-Pt-Pt	0.877981126	-2.113538753	1.898131691	0.208396785	3.249842728	2.28	9	2.13	2.28	6.74	-2.25	1.53	1.04
Pt3Au-Au-Pt	0.961402684	-3.25464299	1.597898665	0.976129407	5.093493965	2.380643664	9.23	2.31	2.54	6.01	-3.56	1.59	1.01
Au3Sc-Sc-Au	0.153012358	1.024307041	1.804346595	-1.43117733	6.922196852	1.978407699	6.56	0.19	1.36	3.84	1.5	1.81	1.24
Au3Ti-Ti-Au	0.246359855	1.040427264	1.828387148	-0.897212039	4.979225285	2.079258657	6.83	0.08	1.54	4.63	1.5	1.61	1.08
Au3V-V-Au	0.389948524	0.668334503	1.977747957	-0.713285779	3.653935792	2.127038113	6.75	0.53	1.63	4.88	1.06	1.49	0.98
Au3Cr-Cr-Au	0.497615463	-0.347873767	1.925131818	-0.494954505	3.143854511	2.142611666	6.77	0.67	1.66	5.27	0.16	1.42	0.9
Au3Mn-Mn-Au	0.531749143	-0.829546679	2.410209664	0.116081586	1.843145359	2.084648844	7.43	0	1.55	5.45	0.07	1.43	0.86
Au3Fe-Fe-Au	0.669961738	-1.019891619	1.901351469	0.124063394	2.589333968	2.227822911	7.9	0.15	1.83	5.54	-0.92	1.41	0.8
Au3Co-Co-Au	0.766606762	-1.451457151	1.612900328	0.175825524	3.524405943	2.251973987	7.88	0.66	1.88	5.76	-1.17	1.39	0.76
Au3Ni-Ni-Au	0.880233882	-1.115715094	1.212930309	0.163196687	6.48724467	2.266280056	7.64	1.16	1.91	5.77	-1.29	1.38	0.71
Au3Cu-Cu-Au	0.975747048	-2.078809796	0.965892102	0.558073628	11.58846913	2.261526444	7.73	1.24	1.9	5.3	-2.67	1.41	0.67
Au3Y-Y-Au	0.158964877	1.132548256	2.187014814	-1.416295561	5.403413152	2.287375406	6.22	0.31	1.22	3.42	1.95	1.99	1.58
Au3Zr-Zr-Au	0.269784074	0.672294444	2.274541474	-0.924703077	4.367788662	1.96083426	6.63	0.43	1.33	4.35	1.95	1.77	1.41
Au3Nb-Nb-Au	0.413245554	0.508346934	2.48074926	-0.591052738	3.024157646	2.111291616	6.76	0.9	1.6	4.69	1.41	1.62	1.28
Au3Mo-Mo-Au	0.509156287	-0.265045545	2.5024378	-0.335990666	2.43907785	2.380574243	7.09	0.75	2.16	5.09	0.35	1.55	1.2
Au3Ru-Ru-Au	0.704692336	-1.382417964	1.958148852	-0.045033085	2.734288214	2.398111117	7.36	1.05	2.2	5.73	-1.41	1.48	1.05
Au3Rh-Rh-Au	0.795793878	-1.377638031	1.723028435	0.109212251	3.601074998	2.432619416	7.46	1.14	2.28	5.91	-1.73	1.49	0.99
Au3Pd-Pd-Au	0.930634797	-1.424144117	1.375141645	0.03580735	5.110545336	2.398111117	8.34	0.56	2.2	5.9	-1.83	1.52	0.94
Au3Ag-Ag-Au	0.979725857	-3.863318428	1.202293302	1.925183077	12.57710475	2.275742675	7.58	1.3	1.93	5.01	-4.3	1.59	0.89
Au3La-La-Au	0.170184131	1.050068999	2.275637818	-1.263673623	4.638391447	2.253790631	5.77	0.5	1.1	3.3	2	1.92	1.58
Au3Ta-Ta-Au	0.379503131	0.544024996	2.600915184	-0.616804629	3.059571855	2.057485265	7.89	0.32	1.5	4.86	2	1.62	1.34
Au3W-W-Au	0.481346671	-0.090467211	2.733946825	-0.374853142	2.367916884	2.466408629	7.98	0.86	2.36	5.09	0.77	1.56	1.27
Au3Re-Re-Au	0.584514402	-1.094058825	2.739102345	-0.093252302	2.006870618	2.261526444	7.88	0.15	1.9	5.88	-0.51	1.52	1.2
Au3Os-Os-Au	0.677211956	-1.830914328	2.598789092	0.070399746	2.030463709	2.398111117	8.7	1.1	2.2	6.25	-1.5	1.49	1.13
Au3Ir-Ir-Au	0.773450421	-1.788159752	2.134989477	0.046317712	2.70954537	2.398111117	9.1	1.57	2.2	6.63	-2.11	1.5	1.08
Au3Pt-Pt-Au	0.895827784	-1.721024672	1.753774589	0.133473672	3.69858597	2.432619416	9	2.13	2.28	6.74	-2.25	1.53	1.04
Au3Au-Au-Au	0.968676528	-3.329922126	1.452734508	1.015657953	6.881360929	2.54	9.23	2.31	2.54	6.01	-3.56	1.59	1.01
Co2V2-V-Co	0.383659174	0.360778837	1.953268838	-0.350991438	2.518202587	1.716810018	6.75	0.53	1.63	4.88	1.06	1.49	0.98
Co2Cr2-Cr-Co	0.495970022	-0.147908769	1.972656537	-0.215113093	2.471009901	1.736850935	6.77	0.67	1.66	5.27	0.16	1.42	0.9
Co2Mn2-Mn-Co	0.552998006	-0.56022134	1.910663581	-0.07903051	2.816168377	1.644842656	7.43	0	1.55	5.45	0.07	1.43	0.86
Co2Fe2-Fe-Co	0.673249127	-1.006581123	1.963696383	0.266737891	2.454936387	1.849838413	7.9	0.15	1.83	5.54	-0.92	1.41	0.8
Co2Co2-Co-Co	0.778482687	-1.212221032	1.523600698	0.205574341	3.997011248	1.88	7.88	0.66	1.88	5.76	-1.17	1.39	0.76
Co2Ni2-Ni-Co	0.865310129	-1.497674115	1.442216099	0.442284446	4.715544157	1.900718594	7.64	1.16	1.91	5.77	-1.29	1.38	0.71
Co2Cu2-Cu-Co	0.965371984	-2.55349404	1.160477913	1.106051353	7.75783373	1.891974594	7.73	1.24	1.9	5.3	-2.67	1.41	0.67
Co2Y2-Y-Co	0.04175168	2.938301488	1.432694485	-1.216148479	4.298910101	1.409156312	6.22	0.31	1.22	3.42	1.95	1.99	1.58
Co2Zr2-Zr-Co	0.221833806	1.239916187	1.724317659	-0.199480878	2.637210492	1.514315854	6.63	0.43	1.33	4.35	1.95	1.77	1.41
Co2Nb2-Nb-Co	0.413220712	0.236061618	2.650702783	-0.074286687	1.921861578	1.706613314	6.76	0.9	1.6	4.69	1.41	1.62	1.28
Co2Mo2-Mo-Co	0.504794593	-0.38376032	2.624523387	0.011463672	1.883185067	2.081492469	7.09	0.75	2.16	5.09	0.35	1.55	1.2
Co2Ru2-Ru-Co	0.714822334	-1.765050354	2.335178873	0.1434766	2.299977445	2.077777819	7.36	1.05	2.2	5.73	-1.41	1.48	1.05
Co2Rh2-Rh-Co	0.792727666	-2.061606365	2.168536171	0.276556057	2.737111578	2.110688033	7.46	1.14	2.28	5.91	-1.73	1.49	0.99
Co2Pd2-Pd-Co	0.918937569	-2.262582647	1.667876509	0.403876449	3.488589762	2.051553069	8.34	0.56	2.2	5.9	-1.83	1.52	0.94
Co2Ag2-Ag-Co	0.978066835	-3.964063986	1.175391035	2.455102532	14.48128806	1.918775196	7.58	1.3	1.93	5.01	-4.3	1.59	0.89
Co2Ta2-Ta-Co	0.389927077	0.146420876	2.778726773	-0.155403703	1.921070165	1.641791093	7.89	0.32	1.5	4.86	2	1.62	1.34
Co2W2-W-Co	0.482906261	-0.367660606	3.104040723	-0.054873923	1.775207666	2.200524	7.98	0.86	2.36	5.09	0.77	1.56	1.27
Co2Re2-Re-Co	0.591687919	-1.28263575	3.00203866	0.006309186	1.944714909	1.892702773	7.88	0.15	1.9	5.88	-0.51	1.52	1.2
Co2Os2-Os-Co	0.683245136	-1.833447192	2.634257482	0.063271121	2.127142699	2.065935451	8.7	1.1	2.2	6.25	-1.5	1.49	1.13
Co2Ir2-Ir-Co	0.772588047	-2.433872331	2.604406865	0.193245336	2.445271952	2.077777819	9.1	1.57	2.2	6.63	-2.11	1.5	1.08
Co2Pt2-Pt-Co	0.87847992	-2.580596985	2.149167607	0.21236444	2.926464915	2.092669409	9	2.13	2.28	6.74	-2.25	1.53	1.04
Ni2Sc2-Sc-Ni	0.204835529	1.36093112	1.810341545	-0.50595011	2.685933754	1.581583047	6.56	0.19	1.36	3.84	1.5	1.81	1.24
Ni2Ti2-Ti-Ni	0.279478559	1.068510181	1.911331209	-0.557797416	2.799953737	1.678517136	6.83	0.08	1.54	4.63	1.5	1.61	1.08
Ni2V2-V-Ni	0.395857268	0.28143998	1.910147685	-0.382810585	2.777292148	1.72672202	6.75	0.53	1.63	4.88	1.06	1.49	0.98
Ni2Cr2-Cr-Ni	0.502059871	-0.14961626	2.013071595	-0.195438409	2.514927381	1.755812755	6.77	0.67	1.66	5.27	0.16	1.42	0.9
Ni2Fe2-Fe-Ni	0.679160292	-1.104415297	1.936199151	0.277987617	2.4483796	1.861589843	7.9	0.15	1.83	5.54	-0.92	1.41	0.8
Ni2Co2-Co-Ni	0.775507644	-1.404510326	1.699473906	0.320298723	3.270333177	1.889180235	7.88	0.66	1.88	5.76	-1.17	1.39	0.76
Ni2Ni2-Ni-Ni	0.874884153	-1.403564958	1.371196921	0.457961776	4.946953799	1.91	7.64	1.16	1.91	5.77	-1.29	1.38	0.71
Ni2Cu2-Cu-Ni	0.96996691	-2.363973207	1.116665397	1.088159358	8.094777056	1.903993702	7.73	1.24	1.9	5.3	-2.67	1.41	0.67
Ni2Y2-Y-Ni	0.196317049	1.930157986	2.059735816	-0.496747863	2.361866489	1.459584509	6.22	0.31	1.22	3.42	1.95	1.99	1.58
Ni2Zr2-Zr-Ni	0.295789251	1.248938553	2.256128119	-0.230701261	2.017165109	1.553156569	6.63	0.43	1.33	4.35	1.95	1.77	1.41
Ni2Nb2-Nb-Ni	0.432269717	0.239029195	2.612275038	-0.134319547	2.038976191	1.717454881	6.76	0.9	1.6	4.69	1.41	1.62	1.28
Ni2Mo2-Mo-Ni	0.524819998	-0.482538577	2.538839569	-0.088721552	2.053769356	2.056295843	7.09	0.75	2.16	5.09	0.35	1.55	1.2
Ni2Ru2-Ru-Ni	0.719162489	-1.691899074	2.265336231	0.134637749	2.383352296	2.089773868	7.36	1.05	2.2	5.73	-1.41	1.48	1.05
Ni2Rh2-Rh-Ni	0.805106318	-1.972102683	2.104318883	0.296289316	2.880380675	2.124096558	7.46	1.14	2.28	5.91	-1.73	1.49	0.99
Ni2Pd2-Pd-Ni	0.923673162	-2.30476679	1.742144343	0.457975724	3.511951332	2.079059677	8.34	0.56	2.2	5.9	-1.83	1.52	0.94
Ni2Ag2-Ag-Ni	0.978935251	-3.956443326	1.361083867	1.521038984	8.890138135	1.921085386	7.58	1.3	1.93	5.01	-4.3	1.59	0.89
Ni2La2-La-Ni	0.047967654	2.796174	2.430511193	-4.55750032	31.12687386	1.393464261	5.77	0.5	1.1	3.3	2	1.92	1.58
Ni2Ta2-Ta-Ni	0.41406859	0.190153201	2.764726514	-0.203937254	2.054167914	1.652220865	7.89	0.32	1.5	4.86	2	1.62	1.34
Ni2W2-W-Ni	0.512101787	-0.333331757	2.975204424	-0.079785793	1.911890168	2.18525232	7.98	0.86	2.36	5.09	0.77	1.56	1.27
Ni2Re2-Re-Ni	0.699096834	-1.822496362	2.533902035	-0.118489011	1.941428436	1.903630291	7.88	0.15	1.9	5.88	-0.51	1.52	1.2
Ni2Os2-Os-Ni	0.701379406	-1.942312909	2.757296788	0.075736127	2.201292899	2.079059677	8.7	1.1	2.2	6.25	-1.5	1.49	1.13
Ni2Ir2-Ir-Ni	0.774650578	-2.407031375	2.547330257	0.164757517	2.508745685	2.089773868	9.1	1.57	2.2	6.63	-2.11	1.5	1.08
Ni2Pt2-Pt-Ni	0.880671224	-2.445465726	2.083072663	0.220893807	2.992734002	2.107445788	9	2.13	2.28	6.74	-2.25	1.53	1.04
Cu2Sc2-Sc-Cu	0.176724297	1.647624714	1.86608064	-0.478525934	3.036677641	1.577897441	6.56	0.19	1.36	3.84	1.5	1.81	1.24
Cu2Ti2-Ti-Cu	0.251900574	0.984201833	1.82774666	-0.570718793	3.469821997	1.67499638	6.83	0.08	1.54	4.63	1.5	1.61	1.08
Cu2V2-V-Cu	0.38557579	0.43196249	1.923581469	-0.340007526	2.941476382	1.723429099	6.75	0.53	1.63	4.88	1.06	1.49	0.98
Cu2Cr2-Cr-Cu	0.498593179	-0.112532138	2.035765706	-0.177859945	2.537856753	1.73042532	6.77	0.67	1.66	5.27	0.16	1.42	0.9
Cu2Mn2-Mn-Cu	0.560690765	-0.60254458	1.878763886	-0.036702961	2.795671336	1.658844456	7.43	0	1.55	5.45	0.07	1.43	0.86
Cu2Fe2-Fe-Cu	0.670657873	-1.040321653	1.890680773	0.245780001	2.545900748	1.857685085	7.9	0.15	1.83	5.54	-0.92	1.41	0.8
Cu2Co2-Co-Cu	0.765235196	-1.368323382	1.640792004	0.288713834	3.334388207	1.887974612	7.88	0.66	1.88	5.76	-1.17	1.39	0.76
Cu2Ni2-Ni-Cu	0.879020773	-1.205417998	1.273683701	0.407441137	5.418236344	1.9059937	7.64	1.16	1.91	5.77	-1.29	1.38	0.71
Cu2Cu2-Cu-Cu	0.97221817	-2.382838709	1.049717075	1.120571636	9.924695117	1.9	7.73	1.24	1.9	5.3	-2.67	1.41	0.67
Cu2Y2-Y-Cu	0.202942876	1.446615664	2.194910476	-0.490864585	2.652257631	1.571444792	6.22	0.31	1.22	3.42	1.95	1.99	1.58
Cu2Zr2-Zr-Cu	0.304226843	0.812479857	2.332209752	-0.337799522	2.522704831	1.558464653	6.63	0.43	1.33	4.35	1.95	1.77	1.41
Cu2Nb2-Nb-Cu	0.414008859	0.301101191	2.445027411	-0.243041355	2.396841317	1.713852451	6.76	0.9	1.6	4.69	1.41	1.62	1.28
Cu2Mo2-Mo-Cu	0.510561571	-0.345907526	2.485783789	-0.096029047	2.118264296	2.061575057	7.09	0.75	2.16	5.09	0.35	1.55	1.2
Cu2Ru2-Ru-Cu	0.716031731	-1.52032084	2.158318276	0.111201108	2.615762858	2.074698767	7.36	1.05	2.2	5.73	-1.41	1.48	1.05
Cu2Rh2-Rh-Cu	0.793428646	-1.755317188	1.967120794	0.315392293	3.13500358	2.119641181	7.46	1.14	2.28	5.91	-1.73	1.49	0.99
Cu2Pd2-Pd-Cu	0.925345846	-1.957855081	1.61247923	0.405314226	3.871315468	2.074698767	8.34	0.56	2.2	5.9	-1.83	1.52	0.94
Cu2Ag2-Ag-Cu	0.977742413	-4.039791574	1.270547425	1.755382711	10.82789335	1.916608627	7.58	1.3	1.93	5.01	-4.3	1.59	0.89
Cu2Ta2-Ta-Cu	0.387416548	0.479118591	2.800859521	-0.146056938	1.998537834	1.613168273	7.89	0.32	1.5	4.86	2	1.62	1.34
Cu2W2-W-Cu	0.482239277	-0.250469772	2.811559595	-0.151236463	2.069650619	2.181084965	7.98	0.86	2.36	5.09	0.77	1.56	1.27
Cu2Re2-Re-Cu	0.595305648	-1.044719655	2.792824108	-0.058471922	2.135611121	1.9	7.88	0.15	1.9	5.88	-0.51	1.52	1.2
Cu2Os2-Os-Cu	0.688067652	-1.838573396	2.680953248	0.033703274	2.25073046	2.074698767	8.7	1.1	2.2	6.25	-1.5	1.49	1.13
Cu2Ir2-Ir-Cu	0.77360116	-2.19995126	2.439945399	0.174180186	2.636742997	2.074698767	9.1	1.57	2.2	6.63	-2.11	1.5	1.08
Cu2Pt2-Pt-Cu	0.882661086	-2.280823875	2.050641633	0.278221311	3.210159439	2.119641181	9	2.13	2.28	6.74	-2.25	1.53	1.04
Cu2Au2-Au-Cu	0.96324028	-3.56192927	1.640327109	0.841450403	5.665076216	2.261526444	9.23	2.31	2.54	6.01	-3.56	1.59	1.01
Ru2Sc2-Sc-Ru	0.169921771	1.637001708	1.93925609	-0.625439091	2.763081042	1.648513156	6.56	0.19	1.36	3.84	1.5	1.81	1.24
Ru2Ti2-Ti-Ru	0.238732685	1.090791158	1.816292568	-0.551094881	2.905286212	1.776157626	6.83	0.08	1.54	4.63	1.5	1.61	1.08
Ru2V2-V-Ru	0.374081477	0.457609201	1.866996616	-0.397467731	2.675583284	1.817798807	6.75	0.53	1.63	4.88	1.06	1.49	0.98
Ru2Cr2-Cr-Ru	0.493751795	-0.158678026	1.919774424	-0.249361202	2.410006505	1.8390186	6.77	0.67	1.66	5.27	0.16	1.42	0.9
Ru2Mn2-Mn-Ru	0.54939715	-0.443839308	1.720443216	-0.101375469	2.993050672	1.783068761	7.43	0	1.55	5.45	0.07	1.43	0.86
Ru2Fe2-Fe-Ru	0.664670442	-1.064870758	1.888315667	0.273587617	2.271448708	1.969879797	7.9	0.15	1.83	5.54	-0.92	1.41	0.8
Ru2Co2-Co-Ru	0.766995476	-1.298389172	1.594134731	0.347965843	3.221303696	2.001998657	7.88	0.66	1.88	5.76	-1.17	1.39	0.76
Ru2Ni2-Ni-Ru	0.861208995	-1.182457084	1.241552508	0.456139901	5.365889755	2.021106006	7.64	1.16	1.91	5.77	-1.29	1.38	0.71
Ru2Cu2-Cu-Ru	0.965519884	-2.136248641	1.027948547	1.2116651	8.822370355	2.014750318	7.73	1.24	1.9	5.3	-2.67	1.41	0.67
Ru2Y2-Y-Ru	0.237964587	0.942440872	1.614489251	-0.581163552	2.716331662	1.521890477	6.22	0.31	1.22	3.42	1.95	1.99	1.58
Ru2Zr2-Zr-Ru	0.282328439	1.075744602	2.388875324	-0.333819892	2.082382247	1.626597337	6.63	0.43	1.33	4.35	1.95	1.77	1.41
Ru2Nb2-Nb-Ru	0.397479676	0.505657079	2.401862565	-0.214501552	2.084928365	1.817360405	6.76	0.9	1.6	4.69	1.41	1.62	1.28
Ru2Mo2-Mo-Ru	0.498962701	-0.180139709	2.369183739	-0.110425448	2.102382607	2.175911979	7.09	0.75	2.16	5.09	0.35	1.55	1.2
Ru2Ru2-Ru-Ru	0.705861118	-1.411098398	2.078006787	0.106605877	2.47241557	2.2	7.36	1.05	2.2	5.73	-1.41	1.48	1.05
Ru2Rh2-Rh-Ru	0.788614769	-1.659811809	1.8782142	0.292226748	3.020706591	2.247656707	7.46	1.14	2.28	5.91	-1.73	1.49	0.99
Ru2Pd2-Pd-Ru	0.911137952	-2.111914686	1.572234794	0.55492405	3.839910117	2.2	8.34	0.56	2.2	5.9	-1.83	1.52	0.94
Ru2Ag2-Ag-Ru	0.969802346	-3.811195636	1.360513513	1.961637895	9.284484746	2.033777591	7.58	1.3	1.93	5.01	-4.3	1.59	0.89
Ru2La2-La-Ru	0.236049847	0.933202191	1.666140068	-0.800033391	2.831552785	1.451458702	5.77	0.5	1.1	3.3	2	1.92	1.58
Ru2Ta2-Ta-Ru	0.364725137	0.612587618	2.584449985	-0.290340696	2.107540296	1.748331683	7.89	0.32	1.5	4.86	2	1.62	1.34
Ru2W2-W-Ru	0.461700642	-0.095642938	2.641538051	-0.169417285	2.093971476	2.294649057	7.98	0.86	2.36	5.09	0.77	1.56	1.27
Ru2Re2-Re-Ru	0.584697675	-0.837629303	2.80386339	-0.059533528	2.026603372	2.014750318	7.88	0.15	1.9	5.88	-0.51	1.52	1.2
Ru2Os2-Os-Ru	0.677040421	-1.680788777	2.633480327	0.031234355	2.194836081	2.2	8.7	1.1	2.2	6.25	-1.5	1.49	1.13
Ru2Ir2-Ir-Ru	0.768209155	-2.013611034	2.329415787	0.152870009	2.5898602	2.2	9.1	1.57	2.2	6.63	-2.11	1.5	1.08
Ru2Pt2-Pt-Ru	0.87459465	-2.310640236	1.972381643	0.357411014	3.199084214	2.247656707	9	2.13	2.28	6.74	-2.25	1.53	1.04
Ru2Au2-Au-Ru	0.953912376	-3.463268945	1.639967322	1.091027354	5.373271657	2.398111117	9.23	2.31	2.54	6.01	-3.56	1.59	1.01
Rh2Sc2-Sc-Rh	0.191097546	1.333440882	1.825069946	-0.812037226	3.147089861	1.672234903	6.56	0.19	1.36	3.84	1.5	1.81	1.24
Rh2Ti2-Ti-Rh	0.2654787	0.89733777	1.692825437	-0.833446783	3.401962479	1.801716149	6.83	0.08	1.54	4.63	1.5	1.61	1.08
Rh2V2-V-Rh	0.394827663	0.227397659	1.770996642	-0.573615701	2.823671857	1.841563089	6.75	0.53	1.63	4.88	1.06	1.49	0.98
Rh2Mn2-Mn-Rh	0.574998259	-0.51572178	1.735490831	-0.147037868	3.020350984	1.808726734	7.43	0	1.55	5.45	0.07	1.43	0.86
Rh2Fe2-Fe-Rh	0.684126438	-0.770098924	1.416257758	-0.025307371	4.057121055	1.998225941	7.9	0.15	1.83	5.54	-0.92	1.41	0.8
Rh2Co2-Co-Rh	0.771817302	-1.321222528	1.618132686	0.30902477	3.186700003	2.030806984	7.88	0.66	1.88	5.76	-1.17	1.39	0.76
Rh2Ni2-Ni-Rh	0.877010296	-1.255523897	1.24953077	0.453302142	5.432520359	2.050189284	7.64	1.16	1.91	5.77	-1.29	1.38	0.71
Rh2Cu2-Cu-Rh	0.970386057	-2.06754941	1.014159833	1.099376141	8.802430073	2.043742138	7.73	1.24	1.9	5.3	-2.67	1.41	0.67
Rh2Y2-Y-Rh	0.193559276	1.1759069	1.715948475	-0.400279139	2.819398719	1.59495753	6.22	0.31	1.22	3.42	1.95	1.99	1.58
Rh2Zr2-Zr-Rh	0.324856778	1.022284088	2.341582245	-0.400000626	2.272175163	1.65000372	6.63	0.43	1.33	4.35	1.95	1.77	1.41
Rh2Mo2-Mo-Rh	0.517871431	-0.205907663	2.395854028	-0.172290551	2.146997478	2.207222881	7.09	0.75	2.16	5.09	0.35	1.55	1.2
Rh2Ru2-Ru-Rh	0.717060799	-1.418796395	2.070370264	0.068601802	2.548266484	2.231657523	7.36	1.05	2.2	5.73	-1.41	1.48	1.05
Rh2Rh2-Rh-Rh	0.797116863	-1.667090835	1.874379825	0.25423156	3.109008824	2.28	7.46	1.14	2.28	5.91	-1.73	1.49	0.99
Rh2Pd2-Pd-Rh	0.917234674	-2.010086898	1.551093669	0.477709847	3.844997699	2.231657523	8.34	0.56	2.2	5.9	-1.83	1.52	0.94
Rh2Ag2-Ag-Rh	0.975182424	-3.814555324	1.350249814	1.905456204	9.321207801	2.06304321	7.58	1.3	1.93	5.01	-4.3	1.59	0.89
Rh2La2-La-Rh	0.129514758	2.207085281	1.832196787	-2.080993611	13.93799344	1.788219363	5.77	0.5	1.1	3.3	2	1.92	1.58
Rh2Ta2-Ta-Rh	0.40706873	0.542860711	2.589753617	-0.373996303	2.212414004	1.773489797	7.89	0.32	1.5	4.86	2	1.62	1.34
Rh2W2-W-Rh	0.490557331	-0.115786075	2.683699554	-0.205741566	2.132011861	2.32766856	7.98	0.86	2.36	5.09	0.77	1.56	1.27
Rh2Re2-Re-Rh	0.693581113	-1.521455512	2.439010572	-0.193795773	2.057878803	2.043742138	7.88	0.15	1.9	5.88	-0.51	1.52	1.2
Rh2Os2-Os-Rh	0.691802752	-1.714650075	2.625777198	0.003597995	2.229426497	2.231657523	8.7	1.1	2.2	6.25	-1.5	1.49	1.13
Rh2Ir2-Ir-Rh	0.77902972	-2.078346041	2.328084552	0.119470768	2.626640117	2.231657523	9.1	1.57	2.2	6.63	-2.11	1.5	1.08
Rh2Pt2-Pt-Rh	0.876189899	-2.199400119	1.958285703	0.287968795	3.179005464	2.28	9	2.13	2.28	6.74	-2.25	1.53	1.04
Rh2Au2-Au-Rh	0.960077676	-3.382324765	1.636085124	1.016246394	5.282881704	2.432619416	9.23	2.31	2.54	6.01	-3.56	1.59	1.01
Pd2Ti2-Ti-Pd	0.271882859	1.05340947	1.695147063	-0.784980162	3.81303463	1.753269615	6.83	0.08	1.54	4.63	1.5	1.61	1.08
Pd2V2-V-Pd	0.395965556	0.347029439	1.801047702	-0.414782823	3.061183624	1.817798807	6.75	0.53	1.63	4.88	1.06	1.49	0.98
Pd2Mn2-Mn-Pd	0.55874043	-0.576581397	2.292943045	0.112321527	1.833056916	1.783068761	7.43	0	1.55	5.45	0.07	1.43	0.86
Pd2Ni2-Ni-Pd	0.877648851	-1.216016882	1.206534106	0.416858933	5.529439338	2.021106006	7.64	1.16	1.91	5.77	-1.29	1.38	0.71
Pd2Cu2-Cu-Pd	0.975457276	-1.850703189	0.948224471	0.921902751	9.150735523	2.014750318	7.73	1.24	1.9	5.3	-2.67	1.41	0.67
Pd2Y2-Y-Pd	0.207946314	1.470207813	2.151561188	-0.621825174	2.932713615	1.708761535	6.22	0.31	1.22	3.42	1.95	1.99	1.58
Pd2Zr2-Zr-Pd	0.305270566	1.13891186	2.285377109	-0.504485091	2.737967393	1.626597337	6.63	0.43	1.33	4.35	1.95	1.77	1.41
Pd2Nb2-Nb-Pd	0.408124081	0.359697729	2.257220421	-0.366054908	2.553294454	1.817360405	6.76	0.9	1.6	4.69	1.41	1.62	1.28
Pd2Mo2-Mo-Pd	0.512883963	-0.14253409	2.343133762	-0.215650091	2.264731078	2.175911979	7.09	0.75	2.16	5.09	0.35	1.55	1.2
Pd2Ru2-Ru-Pd	0.715867593	-1.398019634	1.954503573	0.029366752	2.635193265	2.2	7.36	1.05	2.2	5.73	-1.41	1.48	1.05
Pd2Rh2-Rh-Pd	0.79575878	-1.540685492	1.760965857	0.242253137	3.251594015	2.247656707	7.46	1.14	2.28	5.91	-1.73	1.49	0.99
Pd2Pd2-Pd-Pd	0.917336192	-1.694575932	1.425882227	0.387748401	3.97443888	2.2	8.34	0.56	2.2	5.9	-1.83	1.52	0.94
Pd2Ag2-Ag-Pd	0.980623846	-3.725606649	1.238247619	1.897747227	10.14088896	2.033777591	7.58	1.3	1.93	5.01	-4.3	1.59	0.89
Pd2La2-La-Pd	0.084969931	1.932225858	1.576456669	-0.928689874	4.657771586	1.746141157	5.77	0.5	1.1	3.3	2	1.92	1.58
Pd2W2-W-Pd	0.49521185	-0.055246379	2.637588694	-0.244200879	2.213274182	2.294649057	7.98	0.86	2.36	5.09	0.77	1.56	1.27
Pd2Re2-Re-Pd	0.664291633	-1.364264648	2.427494794	-0.249477289	2.027966799	2.014750318	7.88	0.15	1.9	5.88	-0.51	1.52	1.2
Pd2Os2-Os-Pd	0.687911907	-1.702858181	2.511144785	-0.022788794	2.274135678	2.2	8.7	1.1	2.2	6.25	-1.5	1.49	1.13
Pd2Ir2-Ir-Pd	0.781855469	-1.953531823	2.205649666	0.0919025	2.690464043	2.2	9.1	1.57	2.2	6.63	-2.11	1.5	1.08
Pd2Pt2-Pt-Pd	0.881672448	-2.053100054	1.845405537	0.262109102	3.288684883	2.247656707	9	2.13	2.28	6.74	-2.25	1.53	1.04
Pd2Au2-Au-Pd	0.968270048	-3.16162551	1.520662403	0.944319864	5.470506072	2.398111117	9.23	2.31	2.54	6.01	-3.56	1.59	1.01
Ag2Sc2-Sc-Ag	0.185803606	1.269148214	1.668890457	-1.13841824	5.528030611	1.564394458	6.56	0.19	1.36	3.84	1.5	1.81	1.24
Ag2Ti2-Ti-Ag	0.275201364	1.008409632	1.646091945	-0.610303413	4.07191502	1.685525612	6.83	0.08	1.54	4.63	1.5	1.61	1.08
Ag2Cr2-Cr-Ag	0.492099848	0.600196052	2.201521047	-0.02916551	2.133663031	1.763143971	6.77	0.67	1.66	5.27	0.16	1.42	0.9
Ag2Mn2-Mn-Ag	0.552042785	-0.930547158	2.304650244	0.177743908	1.780403097	1.692084092	7.43	0	1.55	5.45	0.07	1.43	0.86
Ag2Fe2-Fe-Ag	0.683683516	-0.983030855	1.843748026	0.259761996	2.547017317	1.86936272	7.9	0.15	1.83	5.54	-0.92	1.41	0.8
Ag2Co2-Co-Ag	0.765897473	-1.458557645	1.595763409	0.349139538	3.435716985	1.899842651	7.88	0.66	1.88	5.76	-1.17	1.39	0.76
Ag2Ni2-Ni-Ag	0.884524196	-1.083574998	1.165537497	0.512299626	6.604218798	1.917975009	7.64	1.16	1.91	5.77	-1.29	1.38	0.71
Ag2Cu2-Cu-Ag	0.978321711	-2.11179449	0.922986341	1.220704387	13.62946762	1.911943632	7.73	1.24	1.9	5.3	-2.67	1.41	0.67
Ag2Y2-Y-Ag	0.213580807	1.525027588	2.112340151	-0.765897877	3.91610868	1.585575626	6.22	0.31	1.22	3.42	1.95	1.99	1.58
Ag2Zr2-Zr-Ag	0.311954114	0.992195988	2.160256227	-0.570090124	3.409653675	1.543596937	6.63	0.43	1.33	4.35	1.95	1.77	1.41
Ag2Nb2-Nb-Ag	0.428366755	0.423793495	2.33227032	-0.254837669	2.515286648	1.724625937	6.76	0.9	1.6	4.69	1.41	1.62	1.28
Ag2Mo2-Mo-Ag	0.520462413	-0.23992882	2.457071759	-0.074713999	2.170510584	2.064881695	7.09	0.75	2.16	5.09	0.35	1.55	1.2
Ag2Ru2-Ru-Ag	0.709788791	-1.302461049	1.903803065	0.097007104	2.620569941	2.087740577	7.36	1.05	2.2	5.73	-1.41	1.48	1.05
Ag2Rh2-Rh-Ag	0.805359588	-1.361414353	1.642873396	0.258215895	3.527057608	2.132965504	7.46	1.14	2.28	5.91	-1.73	1.49	0.99
Ag2Pd2-Pd-Ag	0.936862745	-1.419934616	1.278610471	0.283053059	5.188789259	2.087740577	8.34	0.56	2.2	5.9	-1.83	1.52	0.94
Ag2Ag2-Ag-Ag	0.983062405	-3.984130346	1.130962197	2.420743234	16.60150431	1.93	7.58	1.3	1.93	5.01	-4.3	1.59	0.89
Ag2La2-La-Ag	0.26973101	1.228150806	2.186052609	-0.774506527	4.340795485	1.516754623	5.77	0.5	1.1	3.3	2	1.92	1.58
Ag2Ta2-Ta-Ag	0.414646125	0.452546724	2.479920434	-0.309642862	2.465703581	1.659119543	7.89	0.32	1.5	4.86	2	1.62	1.34
Ag2W2-W-Ag	0.503028905	-0.150334515	2.676515797	-0.129000217	2.154601587	2.177559975	7.98	0.86	2.36	5.09	0.77	1.56	1.27
Ag2Re2-Re-Ag	0.676255955	-1.551718391	2.446546164	-0.040803243	1.858405413	1.911943632	7.88	0.15	1.9	5.88	-0.51	1.52	1.2
Ag2Os2-Os-Ag	0.690265908	-1.671217741	2.503711386	0.104364993	2.098771301	2.087740577	8.7	1.1	2.2	6.25	-1.5	1.49	1.13
Ag2Ir2-Ir-Ag	0.78719335	-1.747216722	2.07054838	0.126841755	2.732238962	2.087740577	9.1	1.57	2.2	6.63	-2.11	1.5	1.08
Ag2Pt2-Pt-Ag	0.901158739	-1.743038915	1.682171742	0.230851418	3.793259895	2.132965504	9	2.13	2.28	6.74	-2.25	1.53	1.04
Ag2Au2-Au-Ag	0.973300002	-3.360737122	1.399007219	1.15722681	7.916251911	2.275742675	9.23	2.31	2.54	6.01	-3.56	1.59	1.01
Os2Sc2-Sc-Os	0.176700327	1.627448453	2.102499573	-0.737342629	3.017032827	1.648513156	6.56	0.19	1.36	3.84	1.5	1.81	1.24
Os2Ti2-Ti-Os	0.246233898	1.122882342	1.960609889	-0.637666837	3.100142793	1.776157626	6.83	0.08	1.54	4.63	1.5	1.61	1.08
Os2V2-V-Os	0.378140841	0.454324945	1.98127877	-0.482908938	2.846158204	1.817798807	6.75	0.53	1.63	4.88	1.06	1.49	0.98
Os2Cr2-Cr-Os	0.49461017	-0.149062327	1.970379806	-0.338619273	2.695350543	1.8390186	6.77	0.67	1.66	5.27	0.16	1.42	0.9
Os2Mn2-Mn-Os	0.555566456	-0.462432489	1.776026068	-0.16374562	3.194474241	1.783068761	7.43	0	1.55	5.45	0.07	1.43	0.86
Os2Fe2-Fe-Os	0.664300943	-1.010167617	1.90910443	0.211678753	2.399213955	1.969879797	7.9	0.15	1.83	5.54	-0.92	1.41	0.8
Os2Co2-Co-Os	0.761945103	-1.249307957	1.623812725	0.260951278	3.411123081	2.001998657	7.88	0.66	1.88	5.76	-1.17	1.39	0.76
Os2Ni2-Ni-Os	0.869137177	-1.161005268	1.270392237	0.295103653	5.818958633	2.021106006	7.64	1.16	1.91	5.77	-1.29	1.38	0.71
Os2Cu2-Cu-Os	0.964956563	-2.295034916	1.085835901	1.113277507	8.595524326	2.014750318	7.73	1.24	1.9	5.3	-2.67	1.41	0.67
Os2Y2-Y-Os	0.124224056	1.754588144	1.775939603	-0.94258744	3.991411783	1.544489538	6.22	0.31	1.22	3.42	1.95	1.99	1.58
Os2Zr2-Zr-Os	0.288091271	0.965999719	2.554630874	-0.410471307	2.204109516	1.626597337	6.63	0.43	1.33	4.35	1.95	1.77	1.41
Os2Nb2-Nb-Os	0.399223812	0.444272125	2.544875487	-0.293153917	2.197249646	1.817360405	6.76	0.9	1.6	4.69	1.41	1.62	1.28
Os2Mo2-Mo-Os	0.504659614	-0.212632755	2.503687431	-0.157531811	2.210563161	2.175911979	7.09	0.75	2.16	5.09	0.35	1.55	1.2
Os2Ru2-Ru-Os	0.710730785	-1.43925331	2.188718913	0.060951105	2.573390828	2.2	7.36	1.05	2.2	5.73	-1.41	1.48	1.05
Os2Rh2-Rh-Os	0.789889635	-1.710930584	1.997724436	0.229546773	3.019631432	2.247656707	7.46	1.14	2.28	5.91	-1.73	1.49	0.99
Os2Pd2-Pd-Os	0.908074847	-2.250470228	1.687404856	0.494674572	3.791513526	2.2	8.34	0.56	2.2	5.9	-1.83	1.52	0.94
Os2Ag2-Ag-Os	0.967555252	-3.965831976	1.449871813	1.839647625	8.527685289	2.033777591	7.58	1.3	1.93	5.01	-4.3	1.59	0.89
Os2La2-La-Os	0.180148083	1.397066392	2.23210306	-0.558086772	3.691084344	1.451458702	5.77	0.5	1.1	3.3	2	1.92	1.58
Os2Ta2-Ta-Os	0.371780505	0.477844098	2.725850186	-0.346637781	2.183544051	1.748331683	7.89	0.32	1.5	4.86	2	1.62	1.34
Os2W2-W-Os	0.467320958	-0.164824402	2.789343874	-0.191745432	2.141146703	2.294649057	7.98	0.86	2.36	5.09	0.77	1.56	1.27
Os2Re2-Re-Os	0.588641454	-0.930278942	2.918359649	-0.061321998	2.098298718	2.014750318	7.88	0.15	1.9	5.88	-0.51	1.52	1.2
Os2Os2-Os-Os	0.678117548	-1.667391463	2.736825971	0.027647933	2.256215587	2.2	8.7	1.1	2.2	6.25	-1.5	1.49	1.13
Os2Ir2-Ir-Os	0.769852756	-2.071697322	2.45572249	0.142091852	2.594547228	2.2	9.1	1.57	2.2	6.63	-2.11	1.5	1.08
Os2Pt2-Pt-Os	0.871884473	-2.391417936	2.077370789	0.322676743	3.138175325	2.247656707	9	2.13	2.28	6.74	-2.25	1.53	1.04
Os2Au2-Au-Os	0.95048074	-3.711091942	1.773656634	1.0471131	5.074023008	2.398111117	9.23	2.31	2.54	6.01	-3.56	1.59	1.01
Ir2Sc2-Sc-Ir	0.201681422	1.289043738	1.948446292	-0.950298206	3.511261951	1.648513156	6.56	0.19	1.36	3.84	1.5	1.81	1.24
Ir2Ti2-Ti-Ir	0.270643802	0.860265964	1.759764605	-0.952937491	3.83011482	1.776157626	6.83	0.08	1.54	4.63	1.5	1.61	1.08
Ir2V2-V-Ir	0.39192958	0.248871703	1.821901606	-0.719184742	3.188729214	1.817798807	6.75	0.53	1.63	4.88	1.06	1.49	0.98
Ir2Mn2-Mn-Ir	0.572924585	-0.457675758	1.753135429	-0.244873894	3.275140518	1.783068761	7.43	0	1.55	5.45	0.07	1.43	0.86
Ir2Fe2-Fe-Ir	0.66783847	-1.070594767	1.927962257	0.198428182	2.34828332	1.969879797	7.9	0.15	1.83	5.54	-0.92	1.41	0.8
Ir2Co2-Co-Ir	0.766670733	-1.27935955	1.631074197	0.213605944	3.310362145	2.001998657	7.88	0.66	1.88	5.76	-1.17	1.39	0.76
Ir2Ni2-Ni-Ir	0.8723489	-1.171062821	1.258693554	0.249407931	5.768033754	2.021106006	7.64	1.16	1.91	5.77	-1.29	1.38	0.71
Ir2Cu2-Cu-Ir	0.968528093	-2.160624886	1.047098709	0.89980958	8.532701053	2.014750318	7.73	1.24	1.9	5.3	-2.67	1.41	0.67
Ir2Y2-Y-Ir	0.22890891	1.168642591	2.062046907	-0.503745041	3.010760523	1.390793609	6.22	0.31	1.22	3.42	1.95	1.99	1.58
Ir2Zr2-Zr-Ir	0.329445296	0.979774226	2.459337061	-0.509937495	2.460608672	1.626597337	6.63	0.43	1.33	4.35	1.95	1.77	1.41
Ir2Nb2-Nb-Ir	0.427527327	0.35730837	2.460267133	-0.413959517	2.37067323	1.817360405	6.76	0.9	1.6	4.69	1.41	1.62	1.28
Ir2Mo2-Mo-Ir	0.517367311	-0.252713767	2.444400063	-0.252457117	2.329067779	2.175911979	7.09	0.75	2.16	5.09	0.35	1.55	1.2
Ir2Ru2-Ru-Ir	0.716622203	-1.402891254	2.131482261	-0.016846869	2.643447918	2.2	7.36	1.05	2.2	5.73	-1.41	1.48	1.05
Ir2Rh2-Rh-Ir	0.802985721	-1.710631471	1.934876679	0.165038216	3.13662025	2.247656707	7.46	1.14	2.28	5.91	-1.73	1.49	0.99
Ir2Pd2-Pd-Ir	0.910342471	-2.049243284	1.62741344	0.348776329	3.768742908	2.2	8.34	0.56	2.2	5.9	-1.83	1.52	0.94
Ir2Ag2-Ag-Ir	0.972145831	-3.82039127	1.411731334	1.721794823	8.330693865	2.033777591	7.58	1.3	1.93	5.01	-4.3	1.59	0.89
Ir2La2-La-Ir	0.215464066	0.928268194	1.821395171	-0.911927312	3.581870569	1.555634919	5.77	0.5	1.1	3.3	2	1.92	1.58
Ir2Ta2-Ta-Ir	0.411619253	0.475954091	2.683169631	-0.45637579	2.33601477	1.748331683	7.89	0.32	1.5	4.86	2	1.62	1.34
Ir2W2-W-Ir	0.492011651	-0.165093576	2.754464931	-0.260842318	2.249165515	2.294649057	7.98	0.86	2.36	5.09	0.77	1.56	1.27
Ir2Re2-Re-Ir	0.706766394	-1.612838736	2.468610051	-0.239259901	2.177383229	2.014750318	7.88	0.15	1.9	5.88	-0.51	1.52	1.2
Ir2Os2-Os-Ir	0.690257647	-1.673620076	2.689451023	-0.033347274	2.277531162	2.2	8.7	1.1	2.2	6.25	-1.5	1.49	1.13
Ir2Ir2-Ir-Ir	0.779549855	-2.114771538	2.399041405	0.082061847	2.622196294	2.2	9.1	1.57	2.2	6.63	-2.11	1.5	1.08
Ir2Pt2-Pt-Ir	0.878120772	-2.295127101	2.036312463	0.229874115	3.143904605	2.247656707	9	2.13	2.28	6.74	-2.25	1.53	1.04
Ir2Au2-Au-Ir	0.955931373	-3.475552249	1.716471744	0.933137453	4.929320923	2.398111117	9.23	2.31	2.54	6.01	-3.56	1.59	1.01
Pt2Sc2-Sc-Pt	0.17029729	1.426687083	1.945923367	-1.048275573	4.353864233	1.672234903	6.56	0.19	1.36	3.84	1.5	1.81	1.24
Pt2Ti2-Ti-Pt	0.25148299	1.10652072	1.802837129	-0.832098251	4.2136146	1.7761903	6.83	0.08	1.54	4.63	1.5	1.61	1.08
Pt2V2-V-Pt	0.377785528	0.313876972	1.831881328	-0.576596883	3.53687853	1.841563089	6.75	0.53	1.63	4.88	1.06	1.49	0.98
Pt2Mn2-Mn-Pt	0.531458691	-0.833163338	2.382463128	0.102079923	1.765249407	1.808726734	7.43	0	1.55	5.45	0.07	1.43	0.86
Pt2Fe2-Fe-Pt	0.6629926	-1.124859002	1.925322108	0.197734508	2.340769747	1.998225941	7.9	0.15	1.83	5.54	-0.92	1.41	0.8
Pt2Co2-Co-Pt	0.762758662	-1.384540095	1.62588666	0.216273556	3.226509261	2.030806984	7.88	0.66	1.88	5.76	-1.17	1.39	0.76
Pt2Ni2-Ni-Pt	0.867744906	-1.19009105	1.22070265	0.277520177	5.780785006	2.050189284	7.64	1.16	1.91	5.77	-1.29	1.38	0.71
Pt2Cu2-Cu-Pt	0.971757898	-1.906270803	0.98272518	0.795543866	9.396189652	2.043742138	7.73	1.24	1.9	5.3	-2.67	1.41	0.67
Pt2Y2-Y-Pt	0.185172899	1.3988159	2.341535635	-0.760268306	3.092990622	1.74399628	6.22	0.31	1.22	3.42	1.95	1.99	1.58
Pt2Zr2-Zr-Pt	0.28517924	1.07258175	2.415857793	-0.634567116	2.922391393	1.65000372	6.63	0.43	1.33	4.35	1.95	1.77	1.41
Pt2Nb2-Nb-Pt	0.397247876	0.300161235	2.38292552	-0.472649248	2.716057775	1.872760086	6.76	0.9	1.6	4.69	1.41	1.62	1.28
Pt2Mo2-Mo-Pt	0.502355447	-0.148324946	2.405014064	-0.328728623	2.469191694	2.207222881	7.09	0.75	2.16	5.09	0.35	1.55	1.2
Pt2Ru2-Ru-Pt	0.704050459	-1.37803712	2.009906646	-0.053760029	2.800088128	2.231657523	7.36	1.05	2.2	5.73	-1.41	1.48	1.05
Pt2Rh2-Rh-Pt	0.790374297	-1.576383457	1.812327348	0.141123396	3.362218163	2.28	7.46	1.14	2.28	5.91	-1.73	1.49	0.99
Pt2Pd2-Pd-Pt	0.912168402	-1.747105144	1.482766705	0.260699333	4.047512755	2.231657523	8.34	0.56	2.2	5.9	-1.83	1.52	0.94
Pt2Ag2-Ag-Pt	0.975179401	-3.684457951	1.28664714	1.745134839	9.235125174	2.06304321	7.58	1.3	1.93	5.01	-4.3	1.59	0.89
Pt2La2-La-Pt	0.094289902	1.83185207	1.79208831	-1.156161312	4.785724677	1.788219363	5.77	0.5	1.1	3.3	2	1.92	1.58
Pt2Ta2-Ta-Pt	0.371295887	0.339883385	2.622270324	-0.495067586	2.590467127	1.773489797	7.89	0.32	1.5	4.86	2	1.62	1.34
Pt2W2-W-Pt	0.474901234	-0.089934263	2.702968793	-0.322303386	2.35090729	2.32766856	7.98	0.86	2.36	5.09	0.77	1.56	1.27
Pt2Re2-Re-Pt	0.591277209	-1.013070152	2.768326989	-0.159350577	2.223973398	2.043742138	7.88	0.15	1.9	5.88	-0.51	1.52	1.2
Pt2Os2-Os-Pt	0.681519548	-1.725377869	2.563866606	-0.06895959	2.3582668	2.231657523	8.7	1.1	2.2	6.25	-1.5	1.49	1.13
Pt2Ir2-Ir-Pt	0.77486076	-2.00443884	2.256257195	0.042684569	2.718248622	2.231657523	9.1	1.57	2.2	6.63	-2.11	1.5	1.08
Pt2Pt2-Pt-Pt	0.877981126	-2.113538753	1.898131691	0.208396785	3.249842728	2.28	9	2.13	2.28	6.74	-2.25	1.53	1.04
Pt2Au2-Au-Pt	0.960900073	-3.253294123	1.583011808	0.919182959	5.362227596	2.432619416	9.23	2.31	2.54	6.01	-3.56	1.59	1.01
Au2Sc2-Sc-Au	0.189090857	1.204011626	1.765709091	-1.34482127	5.969799852	1.746050626	6.56	0.19	1.36	3.84	1.5	1.81	1.24
Au2Ti2-Ti-Au	0.27251353	0.939717991	1.662593877	-0.852810182	4.896193145	1.847326364	6.83	0.08	1.54	4.63	1.5	1.61	1.08
Au2Cr2-Cr-Au	0.501622888	-0.253497554	1.872259327	-0.375984675	2.948434839	1.967878765	6.77	0.67	1.66	5.27	0.16	1.42	0.9
Au2Mn2-Mn-Au	0.547950182	-0.884826379	2.354701716	0.133310256	1.780266226	1.888567473	7.43	0	1.55	5.45	0.07	1.43	0.86
Au2Fe2-Fe-Au	0.682906442	-1.019964435	1.877817091	0.195568478	2.561328158	2.086431546	7.9	0.15	1.83	5.54	-0.92	1.41	0.8
Au2Co2-Co-Au	0.773316489	-1.48983935	1.602897487	0.265093952	3.488216341	2.120450781	7.88	0.66	1.88	5.76	-1.17	1.39	0.76
Au2Ni2-Ni-Au	0.883886443	-1.117442558	1.184854904	0.362709537	6.529021875	2.140688653	7.64	1.16	1.91	5.77	-1.29	1.38	0.71
Au2Cu2-Cu-Au	0.978046265	-2.092893582	0.942535765	0.880570234	12.30056879	2.133956918	7.73	1.24	1.9	5.3	-2.67	1.41	0.67
Au2Y2-Y-Au	0.212388433	1.481249196	2.277575911	-0.922567499	4.035984644	1.855004247	6.22	0.31	1.22	3.42	1.95	1.99	1.58
Au2Zr2-Zr-Au	0.312070116	0.944876892	2.279686031	-0.742161078	3.62361936	1.77309728	6.63	0.43	1.33	4.35	1.95	1.77	1.41
Au2Nb2-Nb-Au	0.422192013	0.397249641	2.38724601	-0.423003143	2.801941052	1.92488805	6.76	0.9	1.6	4.69	1.41	1.62	1.28
Au2Mo2-Mo-Au	0.518548314	-0.168018967	2.423818931	-0.245017205	2.478215793	2.30465402	7.09	0.75	2.16	5.09	0.35	1.55	1.2
Au2Ru2-Ru-Au	0.707789228	-1.298342742	1.899316526	-0.022516799	2.861827637	2.330167256	7.36	1.05	2.2	5.73	-1.41	1.48	1.05
Au2Rh2-Rh-Au	0.79546892	-1.37941058	1.687212907	0.175379866	3.536621104	2.380643664	7.46	1.14	2.28	5.91	-1.73	1.49	0.99
Au2Pd2-Pd-Au	0.934701679	-1.457652545	1.329645547	0.190070785	4.986653472	2.330167256	8.34	0.56	2.2	5.9	-1.83	1.52	0.94
Au2Ag2-Ag-Au	0.982640347	-3.910510475	1.176304475	2.095794084	13.79096217	2.154109976	7.58	1.3	1.93	5.01	-4.3	1.59	0.89
Au2La2-La-Au	0.264290116	1.211457131	2.351755033	-0.860420051	3.932490128	1.774488849	5.77	0.5	1.1	3.3	2	1.92	1.58
Au2Ta2-Ta-Au	0.406158737	0.446031549	2.591323839	-0.442059757	2.684776271	1.851775109	7.89	0.32	1.5	4.86	2	1.62	1.34
Au2W2-W-Au	0.500423984	-0.108927555	2.716516328	-0.25588544	2.33230403	2.430416408	7.98	0.86	2.36	5.09	0.77	1.56	1.27
Au2Re2-Re-Au	0.662066579	-1.536778039	2.420423849	-0.296745124	2.073007352	2.133956918	7.88	0.15	1.9	5.88	-0.51	1.52	1.2
Au2Os2-Os-Au	0.686797602	-1.696766285	2.529159844	0.037219752	2.128156557	2.330167256	8.7	1.1	2.2	6.25	-1.5	1.49	1.13
Au2Ir2-Ir-Au	0.784375605	-1.787639917	2.123024911	0.090936207	2.697808329	2.330167256	9.1	1.57	2.2	6.63	-2.11	1.5	1.08
Au2Pt2-Pt-Au	0.89666547	-1.815823042	1.758288049	0.215353203	3.592312876	2.380643664	9	2.13	2.28	6.74	-2.25	1.53	1.04
Au2Au2-Au-Au	0.971937541	-3.333277238	1.453797561	1.014316098	6.871790829	2.54	9.23	2.31	2.54	6.01	-3.56	1.59	1.01
CoSc3-Sc-Co	0.177259786	1.111351187	1.346114775	-0.514712884	3.208105207	1.485557713	6.56	0.19	1.36	3.84	1.5	1.81	1.24
CoTi3-Ti-Co	0.348241218	0.762853052	1.945250354	-0.307433248	2.127323686	1.602684905	6.83	0.08	1.54	4.63	1.5	1.61	1.08
CoV3-V-Co	0.426083313	0.337713544	1.885825493	-0.35528087	2.196330588	1.677187641	6.75	0.53	1.63	4.88	1.06	1.49	0.98
CoCr3-Cr-Co	0.52040511	-0.242269983	1.834461629	-0.289179626	2.333251876	1.701837309	6.77	0.67	1.66	5.27	0.16	1.42	0.9
CoMn3-Mn-Co	0.582909515	-0.455893189	2.042491626	0.000374557	2.372361536	1.596717294	7.43	0	1.55	5.45	0.07	1.43	0.86
CoFe3-Fe-Co	0.688698642	-0.920406232	1.953810239	0.269007469	2.51874181	1.839892468	7.9	0.15	1.83	5.54	-0.92	1.41	0.8
CoCo3-Co-Co	0.77908284	-1.384717879	1.740791864	0.311962312	3.251965532	1.88	7.88	0.66	1.88	5.76	-1.17	1.39	0.76
CoNi3-Ni-Co	0.876276198	-1.463544792	1.426643098	0.431646813	4.753021139	1.905353645	7.64	1.16	1.91	5.77	-1.29	1.38	0.71
CoCu3-Cu-Co	0.970523947	-2.591608344	1.162914773	0.990842953	7.798924938	1.895983051	7.73	1.24	1.9	5.3	-2.67	1.41	0.67
CoY3-Y-Co	0.007638662	3.153001464	1.17179168	-0.7519741	2.870097697	1.22	6.22	0.31	1.22	3.42	1.95	1.99	1.58
CoZr3-Zr-Co	0.422670459	0.631798889	2.064364359	0.100396656	1.824306058	1.372511025	6.63	0.43	1.33	4.35	1.95	1.77	1.41
CoNb3-Nb-Co	0.486947405	0.185697505	2.708369553	0.000193391	1.842547815	1.652447065	6.76	0.9	1.6	4.69	1.41	1.62	1.28
CoRu3-Ru-Co	0.718591474	-1.926149492	2.483565092	0.068965617	2.171962046	2.131914162	7.36	1.05	2.2	5.73	-1.41	1.48	1.05
CoRh3-Rh-Co	0.806058395	-2.00384644	2.179705928	0.173241596	2.65759579	2.193711174	7.46	1.14	2.28	5.91	-1.73	1.49	0.99
CoAg3-Ag-Co	0.980253904	-4.419499878	1.61690592	0.898400707	6.350007185	1.917376694	7.58	1.3	1.93	5.01	-4.3	1.59	0.89
CoTa3-Ta-Co	0.446903092	0.407419433	2.419538836	-0.059291984	1.883554674	1.53425631	7.89	0.32	1.5	4.86	2	1.62	1.34
CoW3-W-Co	0.520353029	-0.237194833	2.797610086	-0.030071827	1.775835051	2.239353124	7.98	0.86	2.36	5.09	0.77	1.56	1.27
CoRe3-Re-Co	0.749211487	-2.172384043	2.663214387	-0.031854948	2.000179088	1.895983051	7.88	0.15	1.9	5.88	-0.51	1.52	1.2
CoOs3-Os-Co	0.704498165	-2.296298665	3.097222546	0.024917314	2.037439844	2.131914162	8.7	1.1	2.2	6.25	-1.5	1.49	1.13
CoPt3-Pt-Co	0.885493153	-2.141957332	1.864038705	0.323072746	3.490086939	2.231651071	9	2.13	2.28	6.74	-2.25	1.53	1.04
NiSc3-Sc-Ni	0.17623487	1.835279905	1.952675159	-0.471949593	2.474295448	1.439200556	6.56	0.19	1.36	3.84	1.5	1.81	1.24
NiTi3-Ti-Ni	0.26816994	1.231293711	2.074520827	-0.324874668	2.258220381	1.607767517	6.83	0.08	1.54	4.63	1.5	1.61	1.08
NiV3-V-Ni	0.39092236	0.493074997	1.952273416	-0.25143037	2.433947825	1.682506524	6.75	0.53	1.63	4.88	1.06	1.49	0.98
NiCr3-Cr-Ni	0.495889135	-0.062448306	1.912488874	-0.172257768	2.5547034	1.707234364	6.77	0.67	1.66	5.27	0.16	1.42	0.9
NiFe3-Fe-Ni	0.682928919	-0.953185466	1.580305482	0.12295361	3.628632857	1.842085999	7.9	0.15	1.83	5.54	-0.92	1.41	0.8
NiCo3-Co-Ni	0.772139511	-1.404415625	1.701163092	0.323216761	3.293267574	1.884584528	7.88	0.66	1.88	5.76	-1.17	1.39	0.76
NiNi3-Ni-Ni	0.868689344	-1.40975622	1.372489282	0.460369002	4.944000276	1.91	7.64	1.16	1.91	5.77	-1.29	1.38	0.71
NiCu3-Cu-Ni	0.968449783	-2.369990531	1.119864837	0.964999282	8.060897093	1.901995803	7.73	1.24	1.9	5.3	-2.67	1.41	0.67
NiY3-Y-Ni	0.058057317	2.801979316	1.477230084	-0.900136634	3.447299249	1.478397932	6.22	0.31	1.22	3.42	1.95	1.99	1.58
NiZr3-Zr-Ni	0.284790416	1.284675707	2.311901911	-0.093878236	1.772283382	1.379017615	6.63	0.43	1.33	4.35	1.95	1.77	1.41
NiNb3-Nb-Ni	0.423781464	0.34328076	2.721424151	-0.041701618	1.875893386	1.657687488	6.76	0.9	1.6	4.69	1.41	1.62	1.28
NiMo3-Mo-Ni	0.509533852	-0.491411293	2.718923182	-0.038014703	1.912941533	2.107510147	7.09	0.75	2.16	5.09	0.35	1.55	1.2
NiRu3-Ru-Ni	0.708137724	-1.84184199	2.401679032	0.073522125	2.224679395	2.138675125	7.36	1.05	2.2	5.73	-1.41	1.48	1.05
NiRh3-Rh-Ni	0.800297036	-2.118006591	2.221775845	0.216620751	2.673691147	2.200668115	7.46	1.14	2.28	5.91	-1.73	1.49	0.99
NiPd3-Pd-Ni	0.914039751	-2.315337256	1.867476004	0.275716999	3.074144894	2.138675125	8.34	0.56	2.2	5.9	-1.83	1.52	0.94
NiAg3-Ag-Ni	0.976872697	-4.216359915	1.530702876	1.006657625	6.979127052	1.924980452	7.58	1.3	1.93	5.01	-4.3	1.59	0.89
NiTa3-Ta-Ni	0.403534782	0.091750838	2.829933516	-0.059100798	1.949699427	1.574271672	7.89	0.32	1.5	4.86	2	1.62	1.34
NiW3-W-Ni	0.483233937	-0.475565505	3.092984081	-0.062731284	1.901476225	2.262227492	7.98	0.86	2.36	5.09	0.77	1.56	1.27
NiRe3-Re-Ni	0.598344672	-1.196048921	3.154019571	0.000771216	1.929818762	1.901995803	7.88	0.15	1.9	5.88	-0.51	1.52	1.2
NiOs3-Os-Ni	0.685687568	-2.131701998	3.006607536	0.053139318	2.102558271	2.138675125	8.7	1.1	2.2	6.25	-1.5	1.49	1.13
NiIr3-Ir-Ni	0.773572901	-2.612213848	2.778486776	0.067956551	2.340090446	2.138675125	9.1	1.57	2.2	6.63	-2.11	1.5	1.08
NiPt3-Pt-Ni	0.877742208	-2.030949856	1.798468969	0.325408011	3.538007793	2.235580116	9	2.13	2.28	6.74	-2.25	1.53	1.04
CuSc3-Sc-Cu	0.200132484	1.672185743	2.090424223	-0.331091108	2.479826189	1.454058391	6.56	0.19	1.36	3.84	1.5	1.81	1.24
CuTi3-Ti-Cu	0.259555007	1.171870767	1.916756261	-0.376873198	2.589262904	1.606080454	6.83	0.08	1.54	4.63	1.5	1.61	1.08
CuV3-V-Cu	0.383027983	0.516734517	1.834578784	-0.262971588	2.795454034	1.680741036	6.75	0.53	1.63	4.88	1.06	1.49	0.98
CuCr3-Cr-Cu	0.498475488	-0.011546791	1.844443049	-0.203325987	2.718001119	1.705442929	6.77	0.67	1.66	5.27	0.16	1.42	0.9
CuMn3-Mn-Cu	0.554990641	-0.450515494	1.813291553	-0.041911269	2.885868974	1.608453121	7.43	0	1.55	5.45	0.07	1.43	0.86
CuFe3-Fe-Cu	0.665840424	-0.965576899	1.880822437	0.282185752	2.520877348	1.843790581	7.9	0.15	1.83	5.54	-0.92	1.41	0.8
CuCo3-Co-Cu	0.766827054	-1.346271739	1.641051178	0.319889372	3.325051131	1.883983087	7.88	0.66	1.88	5.76	-1.17	1.39	0.76
CuNi3-Ni-Cu	0.869610045	-1.257359858	1.282935644	0.470531079	5.275299492	1.907995798	7.64	1.16	1.91	5.77	-1.29	1.38	0.71
CuCu3-Cu-Cu	0.9722181	-2.382838648	1.049713919	1.120617809	9.924831891	1.9	7.73	1.24	1.9	5.3	-2.67	1.41	0.67
CuY3-Y-Cu	0.200893196	1.223594951	2.040949001	0.003623056	2.251762453	1.362882055	6.22	0.31	1.22	3.42	1.95	1.99	1.58
CuZr3-Zr-Cu	0.316892622	0.755988649	2.354348183	-0.109945953	2.161319904	1.428341429	6.63	0.43	1.33	4.35	1.95	1.77	1.41
CuNb3-Nb-Cu	0.421549647	0.418494524	2.622886039	-0.105208984	2.023751229	1.655948043	6.76	0.9	1.6	4.69	1.41	1.62	1.28
CuMo3-Mo-Cu	0.513943207	-0.294596682	2.536873171	-0.021907157	1.925702472	2.105298694	7.09	0.75	2.16	5.09	0.35	1.55	1.2
CuRu3-Ru-Cu	0.711138331	-1.678133803	2.263703928	0.104305283	2.38723266	2.13643097	7.36	1.05	2.2	5.73	-1.41	1.48	1.05
CuRh3-Rh-Cu	0.78493768	-1.823640303	2.053645705	0.263088209	2.903289663	2.198358909	7.46	1.14	2.28	5.91	-1.73	1.49	0.99
CuPd3-Pd-Cu	0.920974859	-2.038101786	1.697362937	0.321782078	3.439920219	2.13643097	8.34	0.56	2.2	5.9	-1.83	1.52	0.94
CuAg3-Ag-Cu	0.977767515	-4.122449583	1.38744989	1.306254787	8.761912518	1.922455882	7.58	1.3	1.93	5.01	-4.3	1.59	0.89
CuLa3-La-Cu	0.058160271	2.240555865	2.799382112	-3.872645045	22.66833	1.350215311	5.77	0.5	1.1	3.3	2	1.92	1.58
CuTa3-Ta-Cu	0.395216288	0.28333003	2.75953255	-0.127349406	2.095541478	1.572619757	7.89	0.32	1.5	4.86	2	1.62	1.34
CuW3-W-Cu	0.487591002	-0.162451803	2.916907832	-0.060826684	1.900654496	2.25985369	7.98	0.86	2.36	5.09	0.77	1.56	1.27
CuRe3-Re-Cu	0.592244982	-1.162635254	2.962962015	-0.057076835	2.015967617	1.9	7.88	0.15	1.9	5.88	-0.51	1.52	1.2
CuOs3-Os-Cu	0.684541026	-2.067414811	2.893758077	0.046258233	2.132687955	2.13643097	8.7	1.1	2.2	6.25	-1.5	1.49	1.13
CuIr3-Ir-Cu	0.771243011	-2.361694645	2.608365262	0.118887331	2.486090043	2.13643097	9.1	1.57	2.2	6.63	-2.11	1.5	1.08
CuPt3-Pt-Cu	0.880340453	-2.407976094	2.21182215	0.181050544	2.940606995	2.198358909	9	2.13	2.28	6.74	-2.25	1.53	1.04
CuAu3-Au-Cu	0.963793535	-3.632297501	1.835043776	0.522802992	4.831093773	2.362183805	9.23	2.31	2.54	6.01	-3.56	1.59	1.01
RuSc3-Sc-Ru	0.190539939	1.672673595	1.975830653	-0.357973285	2.263710451	1.497323576	6.56	0.19	1.36	3.84	1.5	1.81	1.24
RuTi3-Ti-Ru	0.2550426	1.156593042	1.814260782	-0.342203382	2.542150275	1.653869023	6.83	0.08	1.54	4.63	1.5	1.61	1.08
RuV3-V-Ru	0.379797799	0.472720451	1.802086943	-0.217039322	2.579882157	1.730751113	6.75	0.53	1.63	4.88	1.06	1.49	0.98
RuFe3-Fe-Ru	0.661208884	-0.976984434	1.857415399	0.310086336	2.365840447	1.898652161	7.9	0.15	1.83	5.54	-0.92	1.41	0.8
RuCo3-Co-Ru	0.763465741	-1.249172362	1.585584305	0.366277191	3.261065549	1.940040586	7.88	0.66	1.88	5.76	-1.17	1.39	0.76
RuNi3-Ni-Ru	0.87077114	-1.214848012	1.22481573	0.537585903	5.622868404	1.964767791	7.64	1.16	1.91	5.77	-1.29	1.38	0.71
RuCu3-Cu-Ru	0.970647314	-2.166259166	0.994201065	1.203497906	9.672223872	1.956534079	7.73	1.24	1.9	5.3	-2.67	1.41	0.67
RuY3-Y-Ru	0.215731429	1.281113089	2.240160646	-0.185208507	1.988659274	1.443845239	6.22	0.31	1.22	3.42	1.95	1.99	1.58
RuZr3-Zr-Ru	0.300654243	0.983624131	2.417713197	-0.154851491	1.92533904	1.470841412	6.63	0.43	1.33	4.35	1.95	1.77	1.41
RuNb3-Nb-Ru	0.404714669	0.516628146	2.448979058	-0.107837687	1.954262207	1.705220411	6.76	0.9	1.6	4.69	1.41	1.62	1.28
RuMo3-Mo-Ru	0.502357151	-0.140576467	2.387098193	-0.033705264	2.058353474	2.167941391	7.09	0.75	2.16	5.09	0.35	1.55	1.2
RuRu3-Ru-Ru	0.705371995	-1.411496261	2.078586554	0.105932537	2.471189117	2.2	7.36	1.05	2.2	5.73	-1.41	1.48	1.05
RuRh3-Rh-Ru	0.792408497	-1.646065311	1.860336204	0.271580364	3.072449314	2.263770592	7.46	1.14	2.28	5.91	-1.73	1.49	0.99
RuPd3-Pd-Ru	0.915651657	-2.010423986	1.555981766	0.441728377	3.814166395	2.2	8.34	0.56	2.2	5.9	-1.83	1.52	0.94
RuAg3-Ag-Ru	0.973306126	-3.988324015	1.350085667	1.775989676	9.593614857	1.981209416	7.58	1.3	1.93	5.01	-4.3	1.59	0.89
RuLa3-La-Ru	0.114855216	1.769717559	2.270491345	-2.885713723	22.13086283	1.26356819	5.77	0.5	1.1	3.3	2	1.92	1.58
RuTa3-Ta-Ru	0.377644828	0.511565221	2.621545487	-0.167383231	2.021261829	1.61941271	7.89	0.32	1.5	4.86	2	1.62	1.34
RuW3-W-Ru	0.469612534	-0.060021498	2.713390909	-0.100187859	2.049998179	2.327095137	7.98	0.86	2.36	5.09	0.77	1.56	1.27
RuRe3-Re-Ru	0.588618539	-0.787838772	2.840989533	-0.029063403	2.053541314	1.956534079	7.88	0.15	1.9	5.88	-0.51	1.52	1.2
RuOs3-Os-Ru	0.690949324	-1.713983227	2.689561782	0.026724266	2.205796498	2.2	8.7	1.1	2.2	6.25	-1.5	1.49	1.13
RuIr3-Ir-Ru	0.784985915	-2.068449585	2.378475703	0.119911433	2.592975309	2.2	9.1	1.57	2.2	6.63	-2.11	1.5	1.08
RuPt3-Pt-Ru	0.880067108	-2.264481139	2.019887911	0.245049781	3.118780507	2.263770592	9	2.13	2.28	6.74	-2.25	1.53	1.04
RuAu3-Au-Ru	0.961188798	-3.551440397	1.680599205	0.81459668	5.077273342	2.468036109	9.23	2.31	2.54	6.01	-3.56	1.59	1.01
RhSc3-Sc-Rh	0.18871957	1.639029129	1.978269676	-0.420523054	2.440737212	1.508058178	6.56	0.19	1.36	3.84	1.5	1.81	1.24
RhTi3-Ti-Rh	0.256000673	1.158810088	1.857760557	-0.399327752	2.653492184	1.665725929	6.83	0.08	1.54	4.63	1.5	1.61	1.08
RhV3-V-Rh	0.371987011	0.479604793	1.811487951	-0.250339565	2.65350606	1.743159202	6.75	0.53	1.63	4.88	1.06	1.49	0.98
RhCr3-Cr-Rh	0.49992944	-0.15512751	1.92818438	-0.217949865	2.385994495	1.768778456	6.77	0.67	1.66	5.27	0.16	1.42	0.9
RhMn3-Mn-Rh	0.558683221	-0.463182592	1.708072848	-0.070198911	3.016961173	1.662665931	7.43	0	1.55	5.45	0.07	1.43	0.86
RhFe3-Fe-Rh	0.665062717	-1.024935829	1.863752061	0.303542246	2.372066841	1.912263965	7.9	0.15	1.83	5.54	-0.92	1.41	0.8
RhCo3-Co-Rh	0.764652541	-1.295996947	1.597131766	0.341357119	3.260142393	1.953949112	7.88	0.66	1.88	5.76	-1.17	1.39	0.76
RhNi3-Ni-Rh	0.86552968	-1.213561954	1.228701299	0.512849829	5.62181077	1.97885359	7.64	1.16	1.91	5.77	-1.29	1.38	0.71
RhCu3-Cu-Rh	0.971698933	-2.074143305	0.986165676	1.113968771	9.513111002	1.97056085	7.73	1.24	1.9	5.3	-2.67	1.41	0.67
RhY3-Y-Rh	0.214536627	1.217682423	2.254773601	-0.26067246	2.177492915	1.458655361	6.22	0.31	1.22	3.42	1.95	1.99	1.58
RhZr3-Zr-Rh	0.302595058	0.962145426	2.418379134	-0.187973073	2.049581771	1.481386158	6.63	0.43	1.33	4.35	1.95	1.77	1.41
RhNb3-Nb-Rh	0.406086028	0.53109762	2.453368637	-0.134022909	2.023362536	1.717445465	6.76	0.9	1.6	4.69	1.41	1.62	1.28
RhMo3-Mo-Rh	0.502329121	-0.191875254	2.381449725	-0.059289446	2.109052937	2.183483781	7.09	0.75	2.16	5.09	0.35	1.55	1.2
RhRu3-Ru-Rh	0.705290686	-1.397485461	2.082833236	0.075053164	2.498842154	2.215772225	7.36	1.05	2.2	5.73	-1.41	1.48	1.05
RhRh3-Rh-Rh	0.79294515	-1.713560951	1.879901086	0.264338202	3.114271229	2.28	7.46	1.14	2.28	5.91	-1.73	1.49	0.99
RhPd3-Pd-Rh	0.911591256	-1.909391514	1.539503952	0.401557251	3.775011381	2.215772225	8.34	0.56	2.2	5.9	-1.83	1.52	0.94
RhAg3-Ag-Rh	0.975168604	-3.939775903	1.341939746	1.733592343	9.600574039	1.995413089	7.58	1.3	1.93	5.01	-4.3	1.59	0.89
RhLa3-La-Rh	0.120075476	1.742964997	2.141750963	-2.404287651	19.78667237	1.1	5.77	0.5	1.1	3.3	2	1.92	1.58
RhTa3-Ta-Rh	0.378947164	0.507232247	2.625948228	-0.1887333	2.086192852	1.631022592	7.89	0.32	1.5	4.86	2	1.62	1.34
RhW3-W-Rh	0.469059388	-0.10654045	2.709571521	-0.130938071	2.078619361	2.343778531	7.98	0.86	2.36	5.09	0.77	1.56	1.27
RhRe3-Re-Rh	0.587736609	-0.81143591	2.830943686	-0.064115764	2.074564444	1.97056085	7.88	0.15	1.9	5.88	-0.51	1.52	1.2
RhOs3-Os-Rh	0.680901738	-1.735418959	2.696366488	0.009748742	2.216474775	2.215772225	8.7	1.1	2.2	6.25	-1.5	1.49	1.13
RhIr3-Ir-Rh	0.768659271	-2.130531631	2.391585659	0.099662512	2.594036493	2.215772225	9.1	1.57	2.2	6.63	-2.11	1.5	1.08
RhPt3-Pt-Rh	0.876097274	-2.26483507	2.016645078	0.220796838	3.104860829	2.28	9	2.13	2.28	6.74	-2.25	1.53	1.04
RhAu3-Au-Rh	0.959998959	-3.494040962	1.685790359	0.778784589	5.038873143	2.485729936	9.23	2.31	2.54	6.01	-3.56	1.59	1.01
PdSc3-Sc-Pd	0.214770263	1.337163771	1.765586026	-0.567097623	2.999506038	1.497323576	6.56	0.19	1.36	3.84	1.5	1.81	1.24
PdTi3-Ti-Pd	0.293505895	0.96916231	1.698553215	-0.535475785	2.898570176	1.653869023	6.83	0.08	1.54	4.63	1.5	1.61	1.08
PdV3-V-Pd	0.400234394	0.393508295	1.848807974	-0.333204756	2.462953337	1.730751113	6.75	0.53	1.63	4.88	1.06	1.49	0.98
PdCr3-Cr-Pd	0.505760733	-0.231277863	1.94547525	-0.209359607	2.284911994	1.747218039	6.77	0.67	1.66	5.27	0.16	1.42	0.9
PdMn3-Mn-Pd	0.573607539	-0.654298837	1.768255796	-0.034134063	2.849133192	1.651903237	7.43	0	1.55	5.45	0.07	1.43	0.86
PdFe3-Fe-Pd	0.671094215	-1.04183229	1.870535249	0.288143297	2.401852968	1.898652161	7.9	0.15	1.83	5.54	-0.92	1.41	0.8
PdCo3-Co-Pd	0.773617169	-1.360155073	1.574146429	0.33600094	3.261093763	1.940040586	7.88	0.66	1.88	5.76	-1.17	1.39	0.76
PdNi3-Ni-Pd	0.866703302	-1.205239449	1.191649882	0.501338002	5.666759933	1.964767791	7.64	1.16	1.91	5.77	-1.29	1.38	0.71
PdCu3-Cu-Pd	0.975769297	-1.935731222	0.944793432	1.122416476	10.4217424	1.956534079	7.73	1.24	1.9	5.3	-2.67	1.41	0.67
PdY3-Y-Pd	0.274785283	1.234937212	2.040612537	-0.20719305	2.350943908	1.413759523	6.22	0.31	1.22	3.42	1.95	1.99	1.58
PdZr3-Zr-Pd	0.338394184	1.085988256	2.319822652	-0.224359316	2.26837228	1.470841412	6.63	0.43	1.33	4.35	1.95	1.77	1.41
PdNb3-Nb-Pd	0.405315431	0.565573132	2.320209565	-0.17506445	2.201565576	1.705220411	6.76	0.9	1.6	4.69	1.41	1.62	1.28
PdMo3-Mo-Pd	0.523387604	-0.070667364	2.31365347	-0.098727797	2.188443813	2.167941391	7.09	0.75	2.16	5.09	0.35	1.55	1.2
PdRu3-Ru-Pd	0.71701914	-1.453571005	1.987986731	0.077028903	2.584381224	2.2	7.36	1.05	2.2	5.73	-1.41	1.48	1.05
PdRh3-Rh-Pd	0.803374114	-1.626431984	1.777733528	0.27896934	3.25459811	2.263770592	7.46	1.14	2.28	5.91	-1.73	1.49	0.99
PdAg3-Ag-Pd	0.980606454	-3.83132017	1.242688898	1.757692725	10.30422542	1.981209416	7.58	1.3	1.93	5.01	-4.3	1.59	0.89
PdLa3-La-Pd	0.332699409	0.944349168	2.471984541	-1.180533772	8.53590219	1.34091502	5.77	0.5	1.1	3.3	2	1.92	1.58
PdTa3-Ta-Pd	0.412365794	0.600233955	2.568971011	-0.219715672	2.224053535	1.61941271	7.89	0.32	1.5	4.86	2	1.62	1.34
PdW3-W-Pd	0.493735852	0.028033572	2.59139823	-0.173160205	2.163891638	2.327095137	7.98	0.86	2.36	5.09	0.77	1.56	1.27
PdRe3-Re-Pd	0.690927533	-1.300621111	2.391300401	-0.19558242	2.126935349	1.956534079	7.88	0.15	1.9	5.88	-0.51	1.52	1.2
PdOs3-Os-Pd	0.685398188	-1.775927976	2.617908421	0.002751511	2.229668836	2.2	8.7	1.1	2.2	6.25	-1.5	1.49	1.13
PdIr3-Ir-Pd	0.77819816	-2.039913915	2.275829665	0.098529043	2.654788485	2.2	9.1	1.57	2.2	6.63	-2.11	1.5	1.08
PdPt3-Pt-Pd	0.883850613	-2.111401867	1.896262414	0.230834186	3.242527631	2.263770592	9	2.13	2.28	6.74	-2.25	1.53	1.04
PdAu3-Au-Pd	0.967451692	-3.249643259	1.582517793	0.80538515	5.358377836	2.468036109	9.23	2.31	2.54	6.01	-3.56	1.59	1.01
AgSc3-Sc-Ag	0.185966536	1.512382186	1.7719393	-0.584954806	3.585040131	1.458621425	6.56	0.19	1.36	3.84	1.5	1.81	1.24
AgTi3-Ti-Ag	0.256569646	1.109132361	1.725970764	-0.33460616	3.028644046	1.611120555	6.83	0.08	1.54	4.63	1.5	1.61	1.08
AgCr3-Cr-Ag	0.500210285	-0.102726939	1.931652788	-0.127294096	2.194755464	1.710794842	6.77	0.67	1.66	5.27	0.16	1.42	0.9
AgMn3-Mn-Ag	0.556712168	-0.902604128	1.870143197	0.089940644	2.495593419	1.613041146	7.43	0	1.55	5.45	0.07	1.43	0.86
AgFe3-Fe-Ag	0.671233131	-0.944596957	1.842994463	0.296164893	2.469674725	1.849576648	7.9	0.15	1.83	5.54	-0.92	1.41	0.8
AgCo3-Co-Ag	0.762123915	-1.492584623	1.591408086	0.411073773	3.369318481	1.889895284	7.88	0.66	1.88	5.76	-1.17	1.39	0.76
AgNi3-Ni-Ag	0.869670907	-1.101824908	1.160069963	0.643577924	6.424964644	1.913983351	7.64	1.16	1.91	5.77	-1.29	1.38	0.71
AgCu3-Cu-Ag	0.976004802	-2.102028026	0.915731758	1.414679747	13.72167407	1.90596246	7.73	1.24	1.9	5.3	-2.67	1.41	0.67
AgY3-Y-Ag	0.201208617	1.443428071	2.116457221	-0.337609072	2.974550425	1.390827906	6.22	0.31	1.22	3.42	1.95	1.99	1.58
AgZr3-Zr-Ag	0.293648345	1.153626177	2.220131533	-0.275887193	2.567466282	1.43282376	6.63	0.43	1.33	4.35	1.95	1.77	1.41
AgNb3-Nb-Ag	0.402612652	0.55004479	2.168284595	-0.189648649	2.467666882	1.661144635	6.76	0.9	1.6	4.69	1.41	1.62	1.28
AgMo3-Mo-Ag	0.506904113	-0.126578235	2.450145799	-0.030906322	2.113278563	2.11190541	7.09	0.75	2.16	5.09	0.35	1.55	1.2
AgRu3-Ru-Ag	0.702635651	-1.319373057	1.872908897	0.111899442	2.692427756	2.143135383	7.36	1.05	2.2	5.73	-1.41	1.48	1.05
AgRh3-Rh-Ag	0.792385763	-1.444423637	1.654307601	0.328370589	3.445645655	2.205257661	7.46	1.14	2.28	5.91	-1.73	1.49	0.99
AgPd3-Pd-Ag	0.925280462	-1.434975622	1.281308009	0.396958843	4.80128894	2.143135383	8.34	0.56	2.2	5.9	-1.83	1.52	0.94
AgAg3-Ag-Ag	0.979929438	-3.97485027	1.130892307	2.41642572	16.56861345	1.93	7.58	1.3	1.93	5.01	-4.3	1.59	0.89
AgLa3-La-Ag	0.237204679	1.11553374	2.158127913	-0.820794872	7.501354701	1.291677237	5.77	0.5	1.1	3.3	2	1.92	1.58
AgTa3-Ta-Ag	0.376983128	0.625868748	2.443306772	-0.23417638	2.395879487	1.577554853	7.89	0.32	1.5	4.86	2	1.62	1.34
AgW3-W-Ag	0.479960514	-0.061282989	2.728567416	-0.067084398	2.098005903	2.266945421	7.98	0.86	2.36	5.09	0.77	1.56	1.27
AgRe3-Re-Ag	0.590088463	-0.869170036	2.754713518	-0.030395948	2.008038541	1.90596246	7.88	0.15	1.9	5.88	-0.51	1.52	1.2
AgOs3-Os-Ag	0.678320105	-1.78131756	2.526140446	0.014065546	2.199129095	2.143135383	8.7	1.1	2.2	6.25	-1.5	1.49	1.13
AgIr3-Ir-Ag	0.770854241	-1.871410074	2.151490047	0.123832833	2.589220524	2.143135383	9.1	1.57	2.2	6.63	-2.11	1.5	1.08
AgPt3-Pt-Ag	0.886183453	-1.811766823	1.710741232	0.259152022	3.611878881	2.205257661	9	2.13	2.28	6.74	-2.25	1.53	1.04
AgAu3-Au-Ag	0.96921459	-3.342536983	1.427204748	1.095523812	7.428184985	2.404243414	9.23	2.31	2.54	6.01	-3.56	1.59	1.01
OsSc3-Sc-Os	0.190744681	1.679983222	2.051233229	-0.431457546	2.427737091	1.497323576	6.56	0.19	1.36	3.84	1.5	1.81	1.24
OsTi3-Ti-Os	0.254793179	1.164420064	1.895228776	-0.394238412	2.6419884	1.653869023	6.83	0.08	1.54	4.63	1.5	1.61	1.08
OsV3-V-Os	0.378751905	0.496366189	1.824072656	-0.277737391	2.76881653	1.730751113	6.75	0.53	1.63	4.88	1.06	1.49	0.98
OsCr3-Cr-Os	0.499199573	-0.029052496	1.896849416	-0.252554528	2.589256867	1.756188005	6.77	0.67	1.66	5.27	0.16	1.42	0.9
OsMn3-Mn-Os	0.53661284	-0.49944359	2.266931517	0.149798051	1.94301836	1.662454986	7.43	0	1.55	5.45	0.07	1.43	0.86
OsFe3-Fe-Os	0.667128241	-0.983389198	1.857037166	0.286749107	2.458313819	1.898652161	7.9	0.15	1.83	5.54	-0.92	1.41	0.8
OsCo3-Co-Os	0.765012881	-1.263351067	1.590000948	0.346005361	3.418623737	1.940040586	7.88	0.66	1.88	5.76	-1.17	1.39	0.76
OsNi3-Ni-Os	0.873342832	-1.155903115	1.225350266	0.45348446	6.028136684	1.964767791	7.64	1.16	1.91	5.77	-1.29	1.38	0.71
OsCu3-Cu-Os	0.968950348	-2.213937948	1.025374508	1.169603273	9.667726661	1.956534079	7.73	1.24	1.9	5.3	-2.67	1.41	0.67
OsY3-Y-Os	0.22202794	1.198698728	2.325281382	-0.24593616	2.115921266	1.443845239	6.22	0.31	1.22	3.42	1.95	1.99	1.58
OsZr3-Zr-Os	0.308027375	0.891878934	2.504907046	-0.206937557	2.009873684	1.470841412	6.63	0.43	1.33	4.35	1.95	1.77	1.41
OsNb3-Nb-Os	0.40869077	0.438663651	2.518358817	-0.152431834	2.020793233	1.705220411	6.76	0.9	1.6	4.69	1.41	1.62	1.28
OsMo3-Mo-Os	0.505776632	-0.180300401	2.462647492	-0.053912249	2.124344732	2.167941391	7.09	0.75	2.16	5.09	0.35	1.55	1.2
OsRu3-Ru-Os	0.708924394	-1.415002662	2.133433037	0.083543792	2.540457165	2.2	7.36	1.05	2.2	5.73	-1.41	1.48	1.05
OsRh3-Rh-Os	0.796486165	-1.675982075	1.923512135	0.231516242	3.076465544	2.263770592	7.46	1.14	2.28	5.91	-1.73	1.49	0.99
OsPd3-Pd-Os	0.914878464	-2.124211562	1.618315238	0.414256417	3.817500484	2.2	8.34	0.56	2.2	5.9	-1.83	1.52	0.94
OsAg3-Ag-Os	0.971428758	-4.013511114	1.39157435	1.732126673	9.178068945	1.981209416	7.58	1.3	1.93	5.01	-4.3	1.59	0.89
OsLa3-La-Os	0.221300248	0.824521624	2.848874859	-1.58145878	9.169546401	1.34091502	5.77	0.5	1.1	3.3	2	1.92	1.58
OsTa3-Ta-Os	0.380125409	0.444100464	2.69327334	-0.202079361	2.066255542	1.61941271	7.89	0.32	1.5	4.86	2	1.62	1.34
OsW3-W-Os	0.471586391	-0.14044795	2.770963994	-0.115883235	2.089230863	2.327095137	7.98	0.86	2.36	5.09	0.77	1.56	1.27
OsRe3-Re-Os	0.590442478	-0.870818404	2.905327894	-0.022781315	2.097431265	1.956534079	7.88	0.15	1.9	5.88	-0.51	1.52	1.2
OsOs3-Os-Os	0.679014744	-1.675368411	2.736540899	0.028662357	2.257388261	2.2	8.7	1.1	2.2	6.25	-1.5	1.49	1.13
OsIr3-Ir-Os	0.77110364	-2.065297942	2.438181857	0.109436075	2.597746303	2.2	9.1	1.57	2.2	6.63	-2.11	1.5	1.08
OsPt3-Pt-Os	0.873755036	-2.373327293	2.082239254	0.239429084	3.097796354	2.263770592	9	2.13	2.28	6.74	-2.25	1.53	1.04
OsAu3-Au-Os	0.954527075	-3.686073262	1.745461217	0.824864476	5.022218375	2.468036109	9.23	2.31	2.54	6.01	-3.56	1.59	1.01
IrSc3-Sc-Ir	0.243071847	1.11339456	1.813160416	-0.584112291	2.928888575	1.497323576	6.56	0.19	1.36	3.84	1.5	1.81	1.24
IrTi3-Ti-Ir	0.256134174	1.131535374	1.872624738	-0.466269897	2.914849183	1.653869023	6.83	0.08	1.54	4.63	1.5	1.61	1.08
IrV3-V-Ir	0.41008552	0.274556684	1.709962638	-0.525535944	2.810940355	1.730751113	6.75	0.53	1.63	4.88	1.06	1.49	0.98
IrFe3-Fe-Ir	0.661218371	-0.999427649	1.885778563	0.278294061	2.402035619	1.898652161	7.9	0.15	1.83	5.54	-0.92	1.41	0.8
IrCo3-Co-Ir	0.771737306	-1.285514687	1.602330364	0.308739325	3.316880717	1.940040586	7.88	0.66	1.88	5.76	-1.17	1.39	0.76
IrNi3-Ni-Ir	0.882712806	-1.210245686	1.218939142	0.460489982	5.899320146	1.964767791	7.64	1.16	1.91	5.77	-1.29	1.38	0.71
IrCu3-Cu-Ir	0.972661996	-2.072921679	1.001075933	1.083738752	9.881218577	1.956534079	7.73	1.24	1.9	5.3	-2.67	1.41	0.67
IrY3-Y-Ir	0.306494738	1.096370774	2.269414235	-0.358844975	2.372590844	1.443845239	6.22	0.31	1.22	3.42	1.95	1.99	1.58
IrZr3-Zr-Ir	0.377886234	0.772667107	2.375787151	-0.275312604	2.222301491	1.470841412	6.63	0.43	1.33	4.35	1.95	1.77	1.41
IrNb3-Nb-Ir	0.447827827	0.407512391	2.413562536	-0.214628031	2.161397418	1.705220411	6.76	0.9	1.6	4.69	1.41	1.62	1.28
IrMo3-Mo-Ir	0.52073987	-0.218455248	2.369774224	-0.132340259	2.188440637	2.167941391	7.09	0.75	2.16	5.09	0.35	1.55	1.2
IrRu3-Ru-Ir	0.714701002	-1.353968266	2.087044074	0.041045378	2.609799461	2.2	7.36	1.05	2.2	5.73	-1.41	1.48	1.05
IrRh3-Rh-Ir	0.798163171	-1.636093132	1.87912816	0.203374416	3.170055112	2.263770592	7.46	1.14	2.28	5.91	-1.73	1.49	0.99
IrPd3-Pd-Ir	0.914074265	-1.93058321	1.564655164	0.34560464	3.830941802	2.2	8.34	0.56	2.2	5.9	-1.83	1.52	0.94
IrAg3-Ag-Ir	0.977405345	-3.881204038	1.352446999	1.693566971	9.210335079	1.981209416	7.58	1.3	1.93	5.01	-4.3	1.59	0.89
IrLa3-La-Ir	0.375489106	0.657298094	2.771040107	-1.087107917	6.554295971	1.34091502	5.77	0.5	1.1	3.3	2	1.92	1.58
IrTa3-Ta-Ir	0.443052041	0.477842462	2.63785096	-0.250253558	2.197956734	1.61941271	7.89	0.32	1.5	4.86	2	1.62	1.34
IrW3-W-Ir	0.505584758	-0.141130662	2.732869176	-0.155561846	2.162043324	2.327095137	7.98	0.86	2.36	5.09	0.77	1.56	1.27
IrRe3-Re-Ir	0.726667465	-1.593548353	2.399459176	-0.186487445	2.227291116	1.956534079	7.88	0.15	1.9	5.88	-0.51	1.52	1.2
IrOs3-Os-Ir	0.690214796	-1.655431017	2.703232929	-0.004195929	2.267445879	2.2	8.7	1.1	2.2	6.25	-1.5	1.49	1.13
IrIr3-Ir-Ir	0.778099543	-2.104504039	2.399230809	0.077946926	2.622277895	2.2	9.1	1.57	2.2	6.63	-2.11	1.5	1.08
IrPt3-Pt-Ir	0.878602584	-2.262631908	2.03277104	0.203354448	3.129962537	2.263770592	9	2.13	2.28	6.74	-2.25	1.53	1.04
IrAu3-Au-Ir	0.961211683	-3.499146978	1.702797943	0.783945917	4.969335576	2.468036109	9.23	2.31	2.54	6.01	-3.56	1.59	1.01
PtSc3-Sc-Pt	0.187756872	1.522911726	1.930080949	-0.632980138	3.230382234	1.508058178	6.56	0.19	1.36	3.84	1.5	1.81	1.24
PtTi3-Ti-Pt	0.25954091	1.105427556	1.82026676	-0.481721588	3.193996317	1.665725929	6.83	0.08	1.54	4.63	1.5	1.61	1.08
PtV3-V-Pt	0.376118348	0.49353249	1.907930583	-0.324818188	2.752115687	1.743159202	6.75	0.53	1.63	4.88	1.06	1.49	0.98
PtCr3-Cr-Pt	0.498199603	-0.179756858	1.91738631	-0.295387677	2.561096342	1.768778456	6.77	0.67	1.66	5.27	0.16	1.42	0.9
PtMn3-Mn-Pt	0.538168097	-0.758603847	2.310246199	0.151027634	1.832381877	1.674373446	7.43	0	1.55	5.45	0.07	1.43	0.86
PtFe3-Fe-Pt	0.665504889	-1.07090335	1.876736421	0.269515602	2.410801854	1.912263965	7.9	0.15	1.83	5.54	-0.92	1.41	0.8
PtCo3-Co-Pt	0.766809743	-1.347318932	1.581322663	0.310500082	3.342957823	1.953949112	7.88	0.66	1.88	5.76	-1.17	1.39	0.76
PtNi3-Ni-Pt	0.872740914	-1.19718784	1.198737867	0.474621142	5.984775249	1.97885359	7.64	1.16	1.91	5.77	-1.29	1.38	0.71
PtCu3-Cu-Pt	0.973028916	-1.971319221	0.967104559	1.140180455	10.96247843	1.97056085	7.73	1.24	1.9	5.3	-2.67	1.41	0.67
PtY3-Y-Pt	0.207089443	1.23874231	2.250102495	-0.400390886	2.693904724	1.458655361	6.22	0.31	1.22	3.42	1.95	1.99	1.58
PtZr3-Zr-Pt	0.293043426	1.058905	2.368222175	-0.327433006	2.452145197	1.481386158	6.63	0.43	1.33	4.35	1.95	1.77	1.41
PtNb3-Nb-Pt	0.398747698	0.552883863	2.357689485	-0.248284601	2.361198224	1.717445465	6.76	0.9	1.6	4.69	1.41	1.62	1.28
PtMo3-Mo-Pt	0.499599414	-0.06386785	2.308883666	-0.165482404	2.340985897	2.183483781	7.09	0.75	2.16	5.09	0.35	1.55	1.2
PtRu3-Ru-Pt	0.704661369	-1.379066109	1.989491402	0.027124974	2.711312936	2.215772225	7.36	1.05	2.2	5.73	-1.41	1.48	1.05
PtRh3-Rh-Pt	0.78827851	-1.586492385	1.789700232	0.227603793	3.365937568	2.28	7.46	1.14	2.28	5.91	-1.73	1.49	0.99
PtPd3-Pd-Pt	0.913559293	-1.692804023	1.437427214	0.330766262	4.128544114	2.215772225	8.34	0.56	2.2	5.9	-1.83	1.52	0.94
PtAg3-Ag-Pt	0.976354644	-3.76871202	1.255675322	1.781376769	10.36428475	1.995413089	7.58	1.3	1.93	5.01	-4.3	1.59	0.89
PtLa3-La-Pt	0.243178144	0.843775798	2.628971564	-1.083637432	6.643427078	1.354669344	5.77	0.5	1.1	3.3	2	1.92	1.58
PtTa3-Ta-Pt	0.372481341	0.602273715	2.607605132	-0.276462944	2.348188073	1.631022592	7.89	0.32	1.5	4.86	2	1.62	1.34
PtW3-W-Pt	0.462327272	0.029222743	2.614093541	-0.213088309	2.282369488	2.343778531	7.98	0.86	2.36	5.09	0.77	1.56	1.27
PtRe3-Re-Pt	0.590226001	-0.760750872	2.727965528	-0.124408354	2.177970918	1.97056085	7.88	0.15	1.9	5.88	-0.51	1.52	1.2
PtOs3-Os-Pt	0.681860821	-1.779970696	2.624650326	-0.016273092	2.294683144	2.215772225	8.7	1.1	2.2	6.25	-1.5	1.49	1.13
PtIr3-Ir-Pt	0.766717678	-2.01808839	2.274152374	0.066539122	2.699563463	2.215772225	9.1	1.57	2.2	6.63	-2.11	1.5	1.08
PtPt3-Pt-Pt	0.878044408	-2.113523698	1.898761693	0.207551201	3.249146995	2.28	9	2.13	2.28	6.74	-2.25	1.53	1.04
PtAu3-Au-Pt	0.962720122	-3.264202249	1.600840359	0.862916043	5.557357754	2.485729936	9.23	2.31	2.54	6.01	-3.56	1.59	1.01
AuSc3-Sc-Au	0.210021485	1.28293623	1.719409936	-0.895349827	4.409402379	1.540983079	6.56	0.19	1.36	3.84	1.5	1.81	1.24
AuTi3-Ti-Au	0.287204402	0.914556957	1.61462527	-0.655845005	3.532019129	1.702093135	6.83	0.08	1.54	4.63	1.5	1.61	1.08
AuFe3-Fe-Au	0.673090895	-0.957924	1.854659789	0.263631561	2.496415056	1.954013749	7.9	0.15	1.83	5.54	-0.92	1.41	0.8
AuCo3-Co-Au	0.775720104	-1.497992362	1.593164997	0.379982698	3.421354429	1.996608992	7.88	0.66	1.88	5.76	-1.17	1.39	0.76
AuNi3-Ni-Au	0.881298219	-1.200217002	1.211226053	0.526647081	5.925264205	2.022057202	7.64	1.16	1.91	5.77	-1.29	1.38	0.71
AuCu3-Cu-Au	0.978129029	-2.119996894	0.925893566	1.237784522	13.04979176	2.013583409	7.73	1.24	1.9	5.3	-2.67	1.41	0.67
AuY3-Y-Au	0.247047803	1.415017927	2.188524756	-0.490246106	3.25327651	1.504362051	6.22	0.31	1.22	3.42	1.95	1.99	1.58
AuZr3-Zr-Au	0.333481087	1.065273163	2.236596351	-0.398986799	2.837863181	1.513728738	6.63	0.43	1.33	4.35	1.95	1.77	1.41
AuNb3-Nb-Au	0.424264275	0.51995039	2.16915997	-0.306245812	2.722978107	1.754941845	6.76	0.9	1.6	4.69	1.41	1.62	1.28
AuMo3-Mo-Au	0.520319187	-0.111985156	2.454737556	-0.112071496	2.214157621	2.231155011	7.09	0.75	2.16	5.09	0.35	1.55	1.2
AuRu3-Ru-Au	0.710899403	-1.336111745	1.876616384	0.052614269	2.777826372	2.264148397	7.36	1.05	2.2	5.73	-1.41	1.48	1.05
AuRh3-Rh-Au	0.801279137	-1.460392657	1.673091531	0.274442823	3.447989393	2.329778435	7.46	1.14	2.28	5.91	-1.73	1.49	0.99
AuPd3-Pd-Au	0.928135321	-1.454064252	1.30073185	0.339099992	4.715371022	2.264148397	8.34	0.56	2.2	5.9	-1.83	1.52	0.94
AuAg3-Ag-Au	0.982731612	-3.965332782	1.159001281	2.237870678	14.93624727	2.038978238	7.58	1.3	1.93	5.01	-4.3	1.59	0.89
AuLa3-La-Au	0.239115486	1.083205238	2.239888906	-0.823423093	6.498649731	1.355978936	5.77	0.5	1.1	3.3	2	1.92	1.58
AuTa3-Ta-Au	0.408012132	0.635047955	2.458036737	-0.33108986	2.583802401	1.666632132	7.89	0.32	1.5	4.86	2	1.62	1.34
AuW3-W-Au	0.504431635	-0.019819634	2.763573277	-0.132946092	2.157062748	2.39494942	7.98	0.86	2.36	5.09	0.77	1.56	1.27
AuRe3-Re-Au	0.695766092	-1.45069515	2.384492077	-0.170035355	2.094544161	2.013583409	7.88	0.15	1.9	5.88	-0.51	1.52	1.2
AuOs3-Os-Au	0.681811727	-1.836086719	2.558468996	-0.017870237	2.211741782	2.264148397	8.7	1.1	2.2	6.25	-1.5	1.49	1.13
AuIr3-Ir-Au	0.777315415	-1.887100343	2.175551394	0.104965108	2.572901051	2.264148397	9.1	1.57	2.2	6.63	-2.11	1.5	1.08
AuPt3-Pt-Au	0.89206191	-1.85486148	1.748341056	0.246374186	3.558459615	2.329778435	9	2.13	2.28	6.74	-2.25	1.53	1.04
AuAu3-Au-Au	0.971938381	-3.333036754	1.453708543	1.014466975	6.872401297	2.54	9.23	2.31	2.54	6.01	-3.56	1.59	1.01
