# Supplementary material for: High-throughput screening of bimetallic catalysts enabled by machine learning
Source: Royal Society of Chemistry journal article supplement (doi:10.1039/c7ta01812f), 2017-01-01
Supplement: c7ta01812f3.csv [file c7ta01812f3.csv]

name	CO	filling	center	sigma_c	skewness	kurtosis	local_Pauling	IonizationPotential	ElectronAffinity	Pauling	WorkFunction	dBandCenter	AtomicRadius	OrbitalRadius
M-Ni-Cu	-1.438149	0.866845025	-1.0582361359999999	1.2256079579999999	0.37087020200000004	5.860200899	1.9069944859999999	7.64	1.16	1.91	5.77	-1.29	1.38	0.71
M-Ni-Ru	-1.6667439999999998	0.870556035	-1.180083304	1.210548241	0.343018922	5.964618415	1.992737811	7.64	1.16	1.91	5.77	-1.29	1.38	0.71
M-Ni-Rh	-1.6187280000000002	0.862961577	-1.1968395729999999	1.219834316	0.279196388	6.020930014	2.014205656	7.64	1.16	1.91	5.77	-1.29	1.38	0.71
M-Ni-Pd	-1.69597	0.866354788	-1.127358063	1.156319776	0.284750287	6.080364474	1.992737811	7.64	1.16	1.91	5.77	-1.29	1.38	0.71
M-Ni-Ag	-1.8565669999999999	0.8823874820000001	-0.806608553	1.012896015	0.19742691399999998	10.77739629	1.91597814	7.64	1.16	1.91	5.77	-1.29	1.38	0.71
M-Ni-W	-1.3481100000000001	0.8769657590000001	-1.419479436	1.3645508709999998	0.9388405240000001	6.339224876	2.035152501	7.64	1.16	1.91	5.77	-1.29	1.38	0.71
M-Ni-Re	-1.5400610000000001	0.8745768509999999	-1.3027279459999999	1.340854816	0.43241485399999996	6.112107486	1.9069944859999999	7.64	1.16	1.91	5.77	-1.29	1.38	0.71
M-Ni-Ir	-1.690516	0.864712906	-1.165495492	1.2654326999999999	-0.11765429	6.872548413	1.992737811	7.64	1.16	1.91	5.77	-1.29	1.38	0.71
M-Ni-Pt	-1.781409	0.8710434159999999	-1.1752458209999999	1.251528675	-0.141375267	6.5305769	2.014205656	7.64	1.16	1.91	5.77	-1.29	1.38	0.71
M-Ni-Au	-1.998968	0.877713209	-0.870215748	1.126491871	-0.288753887	9.5331085	2.080527555	7.64	1.16	1.91	5.77	-1.29	1.38	0.71
M-Ni	-1.389181	0.867716853	-1.4057900319999999	1.374056827	0.454568849	4.933961105	1.91	7.64	1.16	1.91	5.77	-1.29	1.38	0.71
M-Cu	-0.467776	0.972215011	-2.383479033	1.049691457	1.1202214940000002	9.923558007	1.9	7.73	1.24	1.9	5.3	-2.67	1.41	0.67
M-Ru	-1.7830240000000002	0.7051519559999999	-1.408756268	2.07756513	0.107570537	2.469496521	2.2	7.36	1.05	2.2	5.73	-1.41	1.48	1.05
M-Rh	-1.681575	0.7909233459999999	-1.6955933419999998	1.876600066	0.26007318100000004	3.119721635	2.28	7.46	1.14	2.28	5.91	-1.73	1.49	0.99
M-Pd	-1.22526	0.917306575	-1.7110530069999998	1.426094341	0.39040219	3.983247775	2.2	8.34	0.56	2.2	5.9	-1.83	1.52	0.94
M-Ag	0.036088999999999996	0.979916496	-3.9761288789999996	1.1308158590000001	2.414728581	16.55953151	1.93	7.58	1.3	1.93	5.01	-4.3	1.59	0.89
M-W	-1.7707810000000002	0.472083331	0.145742275	2.544757601	-0.028007911	2.1498664	2.36	7.98	0.86	2.36	5.09	0.77	1.56	1.27
M-Re	-1.569804	0.6061554929999999	-0.688847766	2.8451759219999997	0.011364061000000002	2.107986715	1.9	7.88	0.15	1.9	5.88	-0.51	1.52	1.2
M-Ir	-1.7527700000000002	0.7728682790000001	-2.132659248	2.401270602	0.084761765	2.624798985	2.2	9.1	1.57	2.2	6.63	-2.11	1.5	1.08
M-Pt	-1.380699	0.877249873	-2.1169479669999998	1.8979800759999998	0.20837684199999998	3.249394845	2.28	9.0	2.13	2.28	6.74	-2.25	1.53	1.04
M-Cu-Ni	-0.515961	0.9697250409999999	-2.387534456	1.148638055	0.947712856	7.624793025	1.90299449	7.73	1.24	1.9	5.3	-2.67	1.41	0.67
M-Cu-Ru	-0.8283860000000001	0.97050704	-2.197331791	0.995456042	1.1766705179999999	9.989445629	1.985428835	7.73	1.24	1.9	5.3	-2.67	1.41	0.67
M-Cu-Rh	-0.817033	0.9693962290000001	-1.99238033	0.990872828	0.925097108	9.539841707	2.00681794	7.73	1.24	1.9	5.3	-2.67	1.41	0.67
M-Cu-Pd	-0.783075	0.975137516	-1.7429471859999999	0.948210253	0.787343758	9.614806841	1.985428835	7.73	1.24	1.9	5.3	-2.67	1.41	0.67
M-Cu-Ag	-0.705262	0.977176791	-1.9665073990000002	0.859995506	0.832164835	17.06551655	1.9089507030000001	7.73	1.24	1.9	5.3	-2.67	1.41	0.67
M-Cu-W	-0.873944	0.96804238	-2.53649939	1.0587312290000002	1.989933569	12.60691801	2.027687956	7.73	1.24	1.9	5.3	-2.67	1.41	0.67
M-Cu-Re	-0.9689209999999999	0.9702380209999999	-2.3679671840000003	1.0694836140000001	1.3603545030000002	10.86666059	1.9	7.73	1.24	1.9	5.3	-2.67	1.41	0.67
M-Cu-Ir	-0.828	0.970182256	-2.180857203	1.069064669	0.5926702770000001	9.898174283	1.985428835	7.73	1.24	1.9	5.3	-2.67	1.41	0.67
M-Cu-Pt	-0.8602139999999999	0.973768952	-1.865943489	1.02284741	0.397168387	9.925820352999999	2.00681794	7.73	1.24	1.9	5.3	-2.67	1.41	0.67
M-Cu-Au	-0.835183	0.976474444	-1.9400177969999999	0.95530139	0.185319281	13.171104000000001	2.072896583	7.73	1.24	1.9	5.3	-2.67	1.41	0.67
M-Ag-Cu	-0.556632	0.975235298	-4.65240976	1.618581284	1.153901993	6.991143598	1.9209506	7.58	1.3	1.93	5.01	-4.3	1.59	0.89
M-Ag-Ru	-0.025417	0.9752414979999999	-4.157482253	1.394408324	1.574056339	8.809046197999999	2.007321427	7.58	1.3	1.93	5.01	-4.3	1.59	0.89
M-Ag-Rh	0.01515	0.975346915	-4.0390461769999995	1.397757125	1.5243912869999998	8.675612065	2.028946383	7.58	1.3	1.93	5.01	-4.3	1.59	0.89
M-Ag-Pd	0.017204	0.978561815	-3.890840265	1.289041951	1.6900792119999999	9.657074595	2.007321427	7.58	1.3	1.93	5.01	-4.3	1.59	0.89
M-Ag-W	-0.21586999999999998	0.9738318509999999	-4.224772001	1.3323916120000001	2.425214504	13.22258645	2.050046524	7.58	1.3	1.93	5.01	-4.3	1.59	0.89
M-Ag-Re	-0.141771	0.976088805	-4.193392675	1.401676415	1.745822955	9.633915769	1.9209506	7.58	1.3	1.93	5.01	-4.3	1.59	0.89
M-Ag-Ir	0.005549	0.974742337	-4.0500817069999995	1.412557454	1.419228207	8.272261257	2.007321427	7.58	1.3	1.93	5.01	-4.3	1.59	0.89
M-Ag-Pt	-0.077767	0.977788357	-3.798836483	1.282627559	1.533093873	9.085939231000001	2.028946383	7.58	1.3	1.93	5.01	-4.3	1.59	0.89
M-Ag-Au	-0.0008880000000000001	0.980175398	-3.914556622	1.164345849	2.117628331	14.36222929	2.09575365	7.58	1.3	1.93	5.01	-4.3	1.59	0.89
M-Pd-Cu	-0.600751	0.9189852	-2.3539117640000002	1.821104281	0.340387909	3.281089258	2.105338619	8.34	0.56	2.2	5.9	-1.83	1.52	0.94
M-Pd-Ru	-1.0103440000000001	0.917089292	-2.118855073	1.5764789819999998	0.469674088	3.684657637	2.2	8.34	0.56	2.2	5.9	-1.83	1.52	0.94
M-Pd-Rh	-0.981672	0.918316275	-2.090893066	1.5750884369999998	0.427053985	3.791725893	2.223700689	8.34	0.56	2.2	5.9	-1.83	1.52	0.94
M-Pd-Ag	-1.089322	0.930380807	-1.4439068380000002	1.247186083	0.208352622	5.958382321	2.115256651	8.34	0.56	2.2	5.9	-1.83	1.52	0.94
M-Pd-W	-0.843815	0.9173648670000001	-2.554874087	1.658561582	1.007252263	4.903445023	2.24682619	8.34	0.56	2.2	5.9	-1.83	1.52	0.94
M-Pd-Re	-0.9279729999999999	0.915782986	-2.363674485	1.686681739	0.589650934	3.998990149	2.105338619	8.34	0.56	2.2	5.9	-1.83	1.52	0.94
M-Pd-Ir	-1.041173	0.9206629359999999	-2.196915815	1.624636938	0.279053745	3.9424726580000002	2.2	8.34	0.56	2.2	5.9	-1.83	1.52	0.94
M-Pd-Pt	-1.281665	0.9148585459999999	-1.781912561	1.486097078	0.20032552	4.153883	2.223700689	8.34	0.56	2.2	5.9	-1.83	1.52	0.94
M-Pd-Au	-1.297668	0.92886193	-1.4581091990000001	1.326671376	-0.040530337	5.442552309	2.296920647	8.34	0.56	2.2	5.9	-1.83	1.52	0.94
M-Pt-Ni	-1.587175	0.867128993	-3.064217759	2.718108205	0.189250655	2.600397266	2.162043378	9.0	2.13	2.28	6.74	-2.25	1.53	1.04
M-Pt-Cu	-0.575288	0.8723660329999999	-2.60202812	2.415511291	0.200432902	2.761208714	2.1586412569999998	9.0	2.13	2.28	6.74	-2.25	1.53	1.04
M-Pt-Ru	-1.0077559999999999	0.872598622	-2.460556325	2.0741403519999997	0.342065031	3.070153781	2.25569926	9.0	2.13	2.28	6.74	-2.25	1.53	1.04
M-Pt-Rh	-0.959464	0.872152376	-2.419532377	2.070754906	0.30326435	3.10001472	2.28	9.0	2.13	2.28	6.74	-2.25	1.53	1.04
M-Pt-Pd	-1.318066	0.87530344	-2.016570198	1.87542315	0.300490154	3.282096291	2.25569926	9.0	2.13	2.28	6.74	-2.25	1.53	1.04
M-Pt-Ag	-1.1756870000000001	0.8852688479999999	-1.5740407859999999	1.597512285	0.222292958	4.200984836	2.1688103919999997	9.0	2.13	2.28	6.74	-2.25	1.53	1.04
M-Pt-W	-0.988301	0.872566417	-2.748113905	2.1084517959999998	0.773645246	3.69350972	2.303710988	9.0	2.13	2.28	6.74	-2.25	1.53	1.04
M-Pt-Re	-1.0047	0.87729637	-2.749695277	2.1595496240000003	0.473622631	3.207215355	2.1586412569999998	9.0	2.13	2.28	6.74	-2.25	1.53	1.04
M-Pt-Ir	-1.026726	0.878098901	-2.529954085	2.088455751	0.252525545	3.1281862819999997	2.25569926	9.0	2.13	2.28	6.74	-2.25	1.53	1.04
M-Pt-Au	-1.4504139999999999	0.882532225	-1.5885203669999999	1.6485119119999998	0.099651966	4.011627301	2.355073729	9.0	2.13	2.28	6.74	-2.25	1.53	1.04
M-Rh-Ni	-1.579709	0.801435364	-2.168214815	2.328185964	0.23733332899999998	2.5405230690000002	2.162043378	7.46	1.14	2.28	5.91	-1.73	1.49	0.99
M-Rh-Cu	-1.38618	0.801283292	-1.7615431190000002	2.073841435	0.22343680300000002	2.7797432910000004	2.1586412569999998	7.46	1.14	2.28	5.91	-1.73	1.49	0.99
M-Rh-Ru	-1.6762099999999998	0.790191135	-1.703406304	1.894038186	0.286064654	2.971491545	2.25569926	7.46	1.14	2.28	5.91	-1.73	1.49	0.99
M-Rh-Pd	-1.875418	0.790118304	-1.446756674	1.7057882780000002	0.297613434	3.371170958	2.25569926	7.46	1.14	2.28	5.91	-1.73	1.49	0.99
M-Rh-Ag	-1.986358	0.80389591	-1.046978493	1.4411910940000001	0.21436859	4.823315273	2.1688103919999997	7.46	1.14	2.28	5.91	-1.73	1.49	0.99
M-Rh-W	-1.052658	0.8000629659999999	-1.855410905	1.9855177640000001	0.629165442	3.395271265	2.303710988	7.46	1.14	2.28	5.91	-1.73	1.49	0.99
M-Rh-Re	-1.336554	0.794277281	-1.906588421	2.060648411	0.358664621	3.029484584	2.1586412569999998	7.46	1.14	2.28	5.91	-1.73	1.49	0.99
M-Rh-Ir	-1.686578	0.7905516440000001	-1.7278283019999998	1.938099496	0.10345638800000001	3.252867326	2.25569926	7.46	1.14	2.28	5.91	-1.73	1.49	0.99
M-Rh-Pt	-1.9382279999999998	0.790657505	-1.5089443619999998	1.778466137	0.088497384	3.552333017	2.28	7.46	1.14	2.28	5.91	-1.73	1.49	0.99
M-Rh-Au	-2.1288549999999997	0.8046872009999999	-1.1343939170000001	1.522274352	-0.011877796999999999	4.621625188	2.355073729	7.46	1.14	2.28	5.91	-1.73	1.49	0.99
M-Ir-Cu	-1.550453	0.777619152	-2.19568265	2.6288375459999997	0.12964221199999998	2.463258217	2.105338619	9.1	1.57	2.2	6.63	-2.11	1.5	1.08
M-Ir-Ru	-1.79767	0.76861681	-2.069050411	2.365006146	0.206508967	2.5314034519999997	2.2	9.1	1.57	2.2	6.63	-2.11	1.5	1.08
M-Ir-Rh	-1.7995299999999999	0.76542852	-2.057662739	2.353331228	0.181319502	2.604666447	2.223700689	9.1	1.57	2.2	6.63	-2.11	1.5	1.08
M-Ir-Pd	-2.156304	0.7736113259999999	-1.790214459	2.119990295	0.17645433100000002	2.8020028810000004	2.2	9.1	1.57	2.2	6.63	-2.11	1.5	1.08
M-Ir-Ag	-2.331695	0.781659408	-1.2468677670000001	1.772412035	0.084933009	3.56049652	2.115256651	9.1	1.57	2.2	6.63	-2.11	1.5	1.08
M-Ir-W	-1.19434	0.775265746	-2.1463944390000003	2.361573012	0.48717235600000003	2.8329977000000004	2.24682619	9.1	1.57	2.2	6.63	-2.11	1.5	1.08
M-Ir-Re	-1.48295	0.774317592	-2.2353797859999998	2.505910955	0.28553010300000004	2.553143033	2.105338619	9.1	1.57	2.2	6.63	-2.11	1.5	1.08
M-Ir-Pt	-2.1590700000000003	0.76790373	-1.86412033	2.198937731	0.041759752000000004	2.800750616	2.223700689	9.1	1.57	2.2	6.63	-2.11	1.5	1.08
M-Ir-Au	-2.502777	0.7770010829999999	-1.344036495	1.871552043	-0.071161526	3.455312623	2.296920647	9.1	1.57	2.2	6.63	-2.11	1.5	1.08
M-Re-Ru	-1.62014	0.574308668	-0.9312276420000001	2.75613121	-0.021611900000000003	2.094766819	1.985428835	7.88	0.15	1.9	5.88	-0.51	1.52	1.2
M-Re-Rh	-1.807634	0.5767731220000001	-0.984664013	2.753575025	-0.044945269	2.15932007	2.00681794	7.88	0.15	1.9	5.88	-0.51	1.52	1.2
M-Re-Pd	-2.040212	0.5746218989999999	-0.868016773	2.510034337	-0.07599767	2.3432864540000002	1.985428835	7.88	0.15	1.9	5.88	-0.51	1.52	1.2
M-Re-Ag	-2.496507	0.5711725129999999	-0.505802558	2.084983247	-0.127469947	3.056111485	1.9089507030000001	7.88	0.15	1.9	5.88	-0.51	1.52	1.2
M-Re-W	-1.939345	0.594215548	-0.485242836	2.617164359	0.11706925900000001	2.21675972	2.027687956	7.88	0.15	1.9	5.88	-0.51	1.52	1.2
M-Re-Ir	-1.842352	0.575621832	-0.967175235	2.82512265	-0.160272779	2.260070136	1.985428835	7.88	0.15	1.9	5.88	-0.51	1.52	1.2
M-Re-Pt	-1.966093	0.575737705	-0.943664575	2.644841188	-0.22106258	2.431582131	2.00681794	7.88	0.15	1.9	5.88	-0.51	1.52	1.2
M-Re-Au	-2.512565	0.5711979220000001	-0.667894298	2.264508663	-0.370140268	3.131946306	2.072896583	7.88	0.15	1.9	5.88	-0.51	1.52	1.2
M-Co-Ni	-1.4594200000000002	0.764968458	-1.407123495	1.696905118	0.331138579	3.291111651	1.888950184	7.88	0.66	1.88	5.76	-1.17	1.39	0.76
M-Co-Cu	-1.510034	0.7677854120000001	-1.255466424	1.5556996730000001	0.332129685	3.577678544	1.8859777930000001	7.88	0.66	1.88	5.76	-1.17	1.39	0.76
M-Co-Ru	-1.683516	0.7675717240000001	-1.293449909	1.55462477	0.272732934	3.387461322	1.9707761540000002	7.88	0.66	1.88	5.76	-1.17	1.39	0.76
M-Co-Rh	-1.666663	0.7652906540000001	-1.319041407	1.583763095	0.238913443	3.361833107	1.992007405	7.88	0.66	1.88	5.76	-1.17	1.39	0.76
M-Co-Pd	-1.669516	0.763138193	-1.346802975	1.5344031230000001	0.231709356	3.292452398	1.9707761540000002	7.88	0.66	1.88	5.76	-1.17	1.39	0.76
M-Co-Ag	-1.75459	0.763729717	-1.081433987	1.3856950319999999	0.229130489	4.513124476000001	1.89486244	7.88	0.66	1.88	5.76	-1.17	1.39	0.76
M-Co-W	-1.597898	0.779125762	-1.0900603759999998	1.547535423	0.55101927	4.426473731000001	2.0127233980000003	7.88	0.66	1.88	5.76	-1.17	1.39	0.76
M-Co-Re	-1.689156	0.7755802940000001	-1.146844487	1.591088888	0.241684027	3.99177185	1.8859777930000001	7.88	0.66	1.88	5.76	-1.17	1.39	0.76
M-Co-Ir	-1.780607	0.7688148490000001	-1.3127634479999999	1.622768159	0.013992203	3.797230986	1.9707761540000002	7.88	0.66	1.88	5.76	-1.17	1.39	0.76
M-Ru-Cu	-2.01781	0.7058559529999999	-1.4683318630000002	2.24441211	0.119798051	2.45040762	2.105338619	7.36	1.05	2.2	5.73	-1.41	1.48	1.05
M-Ru-Rh	-1.784157	0.7027776059999999	-1.392255456	2.062754696	0.080932091	2.590145843	2.223700689	7.36	1.05	2.2	5.73	-1.41	1.48	1.05
M-Ru-Pd	-1.9921360000000001	0.689615572	-1.210983216	1.857442289	0.041799745	2.850627719	2.2	7.36	1.05	2.2	5.73	-1.41	1.48	1.05
M-Ru-Ag	-2.192759	0.713357679	-0.867884757	1.6313520780000001	0.008219568	3.7596619469999997	2.115256651	7.36	1.05	2.2	5.73	-1.41	1.48	1.05
M-Ru-W	-1.358179	0.7205217909999999	-1.238157003	2.108453805	0.362928085	2.7814629589999997	2.24682619	7.36	1.05	2.2	5.73	-1.41	1.48	1.05
M-Ru-Re	-1.381117	0.7207309140000001	-1.50047294	2.244796052	0.161184551	2.545244006	2.105338619	7.36	1.05	2.2	5.73	-1.41	1.48	1.05
M-Ru-Ir	-1.8353380000000001	0.70102368	-1.375524276	2.135450081	-0.098971071	2.7801390919999998	2.2	7.36	1.05	2.2	5.73	-1.41	1.48	1.05
M-Ru-Pt	-1.965613	0.699912572	-1.325796352	1.962953425	-0.155380023	3.062155031	2.223700689	7.36	1.05	2.2	5.73	-1.41	1.48	1.05
M-Ru-Au	-2.314685	0.7104454259999999	-0.9520822959999999	1.728208459	-0.209249856	3.729918842	2.296920647	7.36	1.05	2.2	5.73	-1.41	1.48	1.05
M-Cr-Ni	-1.779022	0.5004491179999999	-0.21980698399999998	1.927576336	-0.209266557	2.7454136730000003	1.731353191	6.77	0.67	1.66	5.27	0.16	1.42	0.9
M-Cr-Cu	-2.561625	0.498405961	-0.11187595199999999	1.73519681	-0.210974782	3.2724503310000004	1.72862879	6.77	0.67	1.66	5.27	0.16	1.42	0.9
M-Cr-Ru	-1.9724849999999998	0.500219478	-0.023820386000000002	1.7167285369999998	-0.49292271600000004	3.2906442780000003	1.806352339	6.77	0.67	1.66	5.27	0.16	1.42	0.9
M-Cr-Re	-2.016925	0.501291971	0.102715054	1.7980469559999999	-0.42342299200000005	3.4897730539999996	1.72862879	6.77	0.67	1.66	5.27	0.16	1.42	0.9
M-Cr-Ir	-2.039879	0.491904424	-0.139160955	1.8192799780000002	-0.827166585	4.280983414	1.806352339	6.77	0.67	1.66	5.27	0.16	1.42	0.9
M-Mo-Ru	-1.5257020000000001	0.502113039	-0.176277877	2.50400019	-0.09664895	2.0642097390000003	2.171923028	7.09	0.75	2.16	5.09	0.35	1.55	1.2
M-Mo-Rh	-1.6428919999999998	0.501300361	-0.284343549	2.513953433	-0.12154469300000001	2.135785207	2.195321243	7.09	0.75	2.16	5.09	0.35	1.55	1.2
M-Mo-Pd	-1.7827939999999998	0.492277054	-0.200417879	2.3182097759999998	-0.143019192	2.352983127	2.171923028	7.09	0.75	2.16	5.09	0.35	1.55	1.2
M-Mo-Ag	-1.883678	0.49962197399999997	-0.067309063	1.939287341	-0.158306537	3.1230793080000003	2.088261196	7.09	0.75	2.16	5.09	0.35	1.55	1.2
M-Mo-W	-1.5807440000000001	0.505113528	0.077870482	2.3042374430000003	0.047362712	2.213542431	2.21815161	7.09	0.75	2.16	5.09	0.35	1.55	1.2
M-Mo-Re	-1.3677540000000001	0.515905281	-0.177865345	2.5228456180000003	-0.054455580999999996	2.164888416	2.07846974	7.09	0.75	2.16	5.09	0.35	1.55	1.2
M-Mo-Ir	-1.616256	0.500705644	-0.29553609	2.611348028	-0.256227211	2.356872036	2.171923028	7.09	0.75	2.16	5.09	0.35	1.55	1.2
M-Mo-Pt	-1.856397	0.49986817299999997	-0.287598183	2.463121213	-0.331457021	2.567788664	2.195321243	7.09	0.75	2.16	5.09	0.35	1.55	1.2
M-Mo-Au	-1.8889799999999999	0.5000552429999999	-0.190669897	2.110840019	-0.455818011	3.361214732	2.267606748	7.09	0.75	2.16	5.09	0.35	1.55	1.2
M-W-Cu	-1.889888	0.481185275	-0.422482184	2.917473695	-0.098174224	1.939121041	2.2113856259999998	7.98	0.86	2.36	5.09	0.77	1.56	1.27
M-W-Ru	-1.610686	0.471964373	-0.11900977300000001	2.752882872	-0.160925796	1.9912618619999998	2.310815151	7.98	0.86	2.36	5.09	0.77	1.56	1.27
M-W-Rh	-1.696952	0.47136014200000004	-0.254370678	2.772357778	-0.191151268	2.041060432	2.335709656	7.98	0.86	2.36	5.09	0.77	1.56	1.27
M-W-Pd	-1.877965	0.467264036	-0.194667218	2.606101633	-0.221261505	2.242750182	2.310815151	7.98	0.86	2.36	5.09	0.77	1.56	1.27
M-W-Ag	-2.042376	0.46232568	0.09410110199999999	2.245773011	-0.200388137	2.844998341	2.221803235	7.98	0.86	2.36	5.09	0.77	1.56	1.27
M-Mn-Pd	-1.878369	0.532893506	-0.422744004	2.3653260659999997	0.14632736	1.8707839169999998	1.7217060000000002	7.43	0.0	1.55	5.45	0.07	1.43	0.86
M-Mn-Ag	-1.09379	0.547627312	-0.6285210960000001	2.2879876980000002	0.182539487	1.831480693	1.655386394	7.43	0.0	1.55	5.45	0.07	1.43	0.86
M-Mn-Au	-1.4084379999999999	0.5489543929999999	-0.599014073	2.3419938119999997	0.093120545	1.9301698580000002	1.7975554809999998	7.43	0.0	1.55	5.45	0.07	1.43	0.86
M-Fe-Ni	-1.3706040000000002	0.6850295470000001	-0.962154902	1.960292514	0.24120267199999998	2.560435715	1.853641624	7.9	0.15	1.83	5.54	-0.92	1.41	0.8
M-Fe-Cu	-1.31019	0.681567313	-1.013225889	1.88253586	0.263597984	2.6147309290000003	1.850724794	7.9	0.15	1.83	5.54	-0.92	1.41	0.8
M-Fe-Ru	-1.492569	0.6838462559999999	-0.98973232	1.850371849	0.21660657	2.399192723	1.93393809	7.9	0.15	1.83	5.54	-0.92	1.41	0.8
M-Fe-Rh	-1.487416	0.674415487	-1.017200547	1.882965024	0.216486768	2.411511991	1.9547724830000002	7.9	0.15	1.83	5.54	-0.92	1.41	0.8
M-Fe-Ag	-1.570052	0.6678108629999999	-1.1443943840000002	1.759850626	0.254346334	2.578693611	1.859443367	7.9	0.15	1.83	5.54	-0.92	1.41	0.8
M-Fe-Re	-1.624711	0.707141942	-1.06365972	1.713400767	0.014119548999999999	2.333518391	1.850724794	7.9	0.15	1.83	5.54	-0.92	1.41	0.8
M-Fe-Ir	-1.53964	0.676135998	-1.024150846	1.906617176	0.10214450900000001	2.642900542	1.93393809	7.9	0.15	1.83	5.54	-0.92	1.41	0.8
M-Fe-Pt	-1.47351	0.6756387509999999	-1.1332210520000001	1.92376838	0.10071032699999999	2.465695499	1.9547724830000002	7.9	0.15	1.83	5.54	-0.92	1.41	0.8
M-Fe-Au	-1.448475	0.67009737	-1.2138664890000002	1.8382374240000001	0.119171245	2.64811517	2.019137421	7.9	0.15	1.83	5.54	-0.92	1.41	0.8
M-Os-Ni	-2.522938	0.677948625	-2.166946599	3.100409972	0.134514556	2.140099918	2.108656732	8.7	1.1	2.2	6.25	-1.5	1.49	1.13
M-Os-Cu	-2.170909	0.6871654340000001	-1.7705036840000001	2.778754927	0.10405006300000001	2.3000256930000003	2.105338619	8.7	1.1	2.2	6.25	-1.5	1.49	1.13
M-Os-Ru	-1.913305	0.673926354	-1.6120872640000001	2.585487126	0.08369686400000001	2.2283442019999997	2.2	8.7	1.1	2.2	6.25	-1.5	1.49	1.13
M-Os-Rh	-1.932231	0.675083115	-1.603283267	2.572024536	0.063717064	2.307617944	2.223700689	8.7	1.1	2.2	6.25	-1.5	1.49	1.13
M-Os-Pd	-2.248988	0.668174568	-1.403661672	2.324199587	0.030575066	2.479142772	2.2	8.7	1.1	2.2	6.25	-1.5	1.49	1.13
M-Os-Ag	-2.982834	0.678026004	-0.945296515	1.914993514	-0.05251845	3.286978074	2.115256651	8.7	1.1	2.2	6.25	-1.5	1.49	1.13
M-Os-W	-1.593805	0.6894729190000001	-1.277794881	2.5119413109999997	0.270598348	2.395782056	2.24682619	8.7	1.1	2.2	6.25	-1.5	1.49	1.13
M-Os-Re	-1.51496	0.690761469	-1.67397535	2.738179847	0.138288845	2.23652403	2.105338619	8.7	1.1	2.2	6.25	-1.5	1.49	1.13
M-Os-Ir	-1.918565	0.678258425	-1.6191228780000002	2.63875719	-0.052565812	2.3706941230000003	2.2	8.7	1.1	2.2	6.25	-1.5	1.49	1.13
M-Os-Pt	-2.167563	0.670704188	-1.5087685	2.435542034	-0.118856376	2.5389844790000002	2.223700689	8.7	1.1	2.2	6.25	-1.5	1.49	1.13
M-Os-Au	-3.110156	0.6760908609999999	-1.0926210140000001	2.054444498	-0.25887306	3.254590559	2.296920647	8.7	1.1	2.2	6.25	-1.5	1.49	1.13
M-Ti-Ni	-1.7636490000000002	0.28299169	1.1853185720000001	2.2214159469999997	-0.322053894	2.182145202	1.642761495	6.83	0.08	1.54	4.63	1.5	1.61	1.08
M-Ti-Ru	-1.640011	0.260528606	1.229216624	1.95243275	-0.450874723	2.686860764	1.713923008	6.83	0.08	1.54	4.63	1.5	1.61	1.08
M-Ti-Rh	-1.582466	0.261414329	1.188489794	1.9885407569999998	-0.508449213	2.861947752	1.73238717	6.83	0.08	1.54	4.63	1.5	1.61	1.08
M-Ti-Pd	-1.819175	0.24635543699999998	1.0941785720000001	1.873722162	-0.572252086	3.309914294	1.713923008	6.83	0.08	1.54	4.63	1.5	1.61	1.08
M-Ti-Ag	-1.7436639999999999	0.248835098	0.965338955	1.5685477840000002	-0.49234158899999997	4.318571094	1.6479032009999999	6.83	0.08	1.54	4.63	1.5	1.61	1.08
M-Ti-W	-1.3277809999999999	0.25282845600000003	1.094256892	1.854600834	-0.31847533	2.708586885	1.7504032280000001	6.83	0.08	1.54	4.63	1.5	1.61	1.08
M-Ti-Re	-1.526046	0.257202418	1.215583423	1.929733989	-0.42822720700000005	2.76358125	1.640176499	6.83	0.08	1.54	4.63	1.5	1.61	1.08
M-V-Ni	-1.8964560000000001	0.39779088	0.536948627	2.098138294	-0.265354998	2.4470662180000002	1.7093906859999999	6.75	0.53	1.63	4.88	1.06	1.49	0.98
M-V-Cu	-1.793567	0.390468811	0.502502296	1.881157913	-0.25463639600000004	2.875444073	1.706700844	6.75	0.53	1.63	4.88	1.06	1.49	0.98
M-V-Ru	-1.772863	0.376073082	0.482559979	1.8924736290000002	-0.42515974799999995	2.887109195	1.783438457	6.75	0.53	1.63	4.88	1.06	1.49	0.98
M-V-Rh	-1.87748	0.391825405	0.400788831	1.866188442	-0.5066158	3.141595498	1.802651512	6.75	0.53	1.63	4.88	1.06	1.49	0.98
M-V-Pd	-2.065813	0.37972812899999997	0.387099115	1.728802947	-0.61226345	3.793544655	1.783438457	6.75	0.53	1.63	4.88	1.06	1.49	0.98
M-V-Ag	-2.167796	0.37798028899999997	0.542333546	1.74806983	-0.26541937	3.406844177	1.7147409359999999	6.75	0.53	1.63	4.88	1.06	1.49	0.98
M-V-W	-1.5155049999999999	0.427733797	0.257042086	1.790914556	-0.38723879299999997	2.733139705	1.8213982880000001	6.75	0.53	1.63	4.88	1.06	1.49	0.98
M-V-Re	-1.7005849999999998	0.45289859	0.010522561000000001	1.619905554	-0.697981538	3.419750305	1.706700844	6.75	0.53	1.63	4.88	1.06	1.49	0.98
M-V-Ir	-1.8164169999999997	0.395027167	0.366266637	1.933623916	-0.7156638909999999	3.715567651	1.783438457	6.75	0.53	1.63	4.88	1.06	1.49	0.98
M-V-Pt	-2.023025	0.38220104899999996	0.318737007	1.8596174090000002	-0.8583705970000001	4.300834898	1.802651512	6.75	0.53	1.63	4.88	1.06	1.49	0.98
M-V-Au	-2.023521	0.378638966	0.41038701299999997	1.809815605	-0.622115127	4.171555849	1.862007552	6.75	0.53	1.63	4.88	1.06	1.49	0.98
M-Nb-Pd	-1.8823889999999999	0.406551664	0.457234976	2.423230753	-0.26034720699999997	2.1814268130000003	1.760397699	6.76	0.9	1.6	4.69	1.41	1.62	1.28
M-Nb-Ag	-1.827926	0.395786496	0.47277399600000003	2.127302491	-0.252971319	2.827333158	1.6925877	6.76	0.9	1.6	4.69	1.41	1.62	1.28
M-Nb-Re	-1.307431	0.417497501	0.448476927	2.5515846730000002	-0.164832359	2.05006959	1.684651481	6.76	0.9	1.6	4.69	1.41	1.62	1.28
M-Ta-Ru	-1.577409	0.388331763	0.45519743799999995	2.7543303580000003	-0.17578652399999997	1.972122994	1.682637973	7.89	0.32	1.5	4.86	2.0	1.62	1.34
M-Ta-Rh	-1.6497099999999998	0.382488224	0.40676736399999996	2.784332076	-0.210985542	2.022426996	1.7007651000000001	7.89	0.32	1.5	4.86	2.0	1.62	1.34
M-Ta-Pd	-2.008854	0.382627415	0.565063716	2.672929042	-0.290834175	2.177817557	1.682637973	7.89	0.32	1.5	4.86	2.0	1.62	1.34
M-Ta-Ag	-1.953471	0.3681353	0.558157739	2.313474839	-0.38300535399999996	2.711125312	1.6178232559999999	7.89	0.32	1.5	4.86	2.0	1.62	1.34
M-Ta-Ir	-1.580511	0.37769879100000003	0.460151574	2.8668829280000003	-0.32459657199999997	2.228939614	1.682637973	7.89	0.32	1.5	4.86	2.0	1.62	1.34
M-Ta-Pt	-2.00733	0.37912251799999996	0.537043777	2.79712109	-0.434596892	2.398012497	1.7007651000000001	7.89	0.32	1.5	4.86	2.0	1.62	1.34
M-Ta-Au	-1.880511	0.367254236	0.515671117	2.497498834	-0.579232381	2.97682502	1.7567663180000002	7.89	0.32	1.5	4.86	2.0	1.62	1.34
Cu-M-Cu-Sc	-0.566227	0.9711551829999999	-2.654663525	1.031917115	2.2085031	13.89836264	1.7186569280000001	7.73	1.24	1.9	5.3	-2.67	1.41	0.67
Cu-M-Cu-Ti	-0.7145020000000001	0.970092748	-2.7120027939999996	1.05635277	1.984771904	12.102841699999999	1.78395435	7.73	1.24	1.9	5.3	-2.67	1.41	0.67
Cu-M-Cu-V	-0.763147	0.967214729	-2.755631288	1.081023151	1.7819930069999999	10.63695658	1.8146120980000002	7.73	1.24	1.9	5.3	-2.67	1.41	0.67
Cu-M-Cu-Cr	-0.8254530000000001	0.96725141	-2.687622008	1.093543245	1.553496824	9.450704127	1.824567552	7.73	1.24	1.9	5.3	-2.67	1.41	0.67
Cu-M-Cu-Mn	-0.574575	0.967774363	-2.5005985930000003	1.086231699	1.46411736	9.688246762999999	1.7874217159999999	7.73	1.24	1.9	5.3	-2.67	1.41	0.67
Cu-M-Cu-Fe	-0.5528850000000001	0.9694352079999999	-2.488683897	1.0496160540000001	1.39554611	10.05796051	1.8787234130000001	7.73	1.24	1.9	5.3	-2.67	1.41	0.67
Cu-M-Cu-Co	-0.655574	0.96968963	-2.380003573	1.0695628240000001	1.172145977	8.85939777	1.8939777619999998	7.73	1.24	1.9	5.3	-2.67	1.41	0.67
Cu-M-Cu-Ni	-0.5880989999999999	0.970837265	-2.21071291	1.0658574440000002	1.132428983	8.566567233999999	1.90299449	7.73	1.24	1.9	5.3	-2.67	1.41	0.67
Cu-M-Cu-Zn	-0.509854	0.973306384	-2.5250567999999998	1.067960335	0.658671625	12.87663099	1.821263164	7.73	1.24	1.9	5.3	-2.67	1.41	0.67
Cu-M-Cu-Ga	-0.38733	0.970750764	-2.471096536	1.090285868	1.058039818	13.677288800000001	1.872539955	7.73	1.24	1.9	5.3	-2.67	1.41	0.67
Cu-M-Cu-Zr	-0.765232	0.9690695690000001	-2.699069372	1.070446417	2.118646778	13.56104529	1.707194539	7.73	1.24	1.9	5.3	-2.67	1.41	0.67
Cu-M-Cu-Nb	-0.8142659999999999	0.968325853	-2.7817077919999997	1.088232342	1.8175505269999999	11.70438671	1.8045275440000001	7.73	1.24	1.9	5.3	-2.67	1.41	0.67
Cu-M-Cu-Mo	-0.899215	0.967903823	-2.672833786	1.094395828	1.515944832	10.23306691	1.9745295880000002	7.73	1.24	1.9	5.3	-2.67	1.41	0.67
Cu-M-Cu-Ru	-0.826787	0.968275552	-2.261283142	1.095483808	0.944275932	8.331199209	1.985428835	7.73	1.24	1.9	5.3	-2.67	1.41	0.67
Cu-M-Cu-Rh	-0.634279	0.970909652	-2.129307182	1.0822917509999999	0.837981358	8.292163172	2.00681794	7.73	1.24	1.9	5.3	-2.67	1.41	0.67
Cu-M-Cu-Pd	-0.519213	0.9733372159999999	-2.134249805	1.048146627	0.748201935	8.749339082	1.985428835	7.73	1.24	1.9	5.3	-2.67	1.41	0.67
Cu-M-Cu-Ag	-0.346053	0.9745959609999999	-2.4059389159999998	1.009620215	0.8426945770000001	11.96349171	1.9089507030000001	7.73	1.24	1.9	5.3	-2.67	1.41	0.67
Cu-M-Cu-Ta	-0.9224370000000001	0.968009709	-2.878872008	1.1325118	1.7740474519999998	11.56971594	1.7699251409999999	7.73	1.24	1.9	5.3	-2.67	1.41	0.67
Cu-M-Cu-W	-0.914307	0.968445673	-2.809268639	1.141785941	1.4323033219999999	10.09201092	2.027687956	7.73	1.24	1.9	5.3	-2.67	1.41	0.67
Cu-M-Cu-Os	-0.892899	0.968788715	-2.427062308	1.167684342	0.697275523	8.214960488	1.985428835	7.73	1.24	1.9	5.3	-2.67	1.41	0.67
Cu-M-Cu-Ir	-0.647654	0.9704432409999999	-2.173854962	1.1301158759999999	0.45070631	8.214011849	1.985428835	7.73	1.24	1.9	5.3	-2.67	1.41	0.67
Cu-M-Cu-Pt	-0.51445	0.972706396	-2.095402233	1.0862212409999998	0.369807926	8.744596768	2.00681794	7.73	1.24	1.9	5.3	-2.67	1.41	0.67
Ag-M-Ag-V	-0.628505	0.974359181	-4.263205793	1.22491138	2.935024999	16.11976679	1.834621157	7.58	1.3	1.93	5.01	-4.3	1.59	0.89
Ag-M-Ag-Mn	-0.037919	0.974447848	-4.268165337	1.225169384	2.865431847	16.57374411	1.8071309580000001	7.58	1.3	1.93	5.01	-4.3	1.59	0.89
Ag-M-Ag-Fe	-0.027601999999999998	0.976969588	-4.139127053	1.174967874	2.824082413	16.82918337	1.899439404	7.58	1.3	1.93	5.01	-4.3	1.59	0.89
Ag-M-Ag-Co	-0.428529	0.976474885	-4.032789307	1.205829426	2.635820837	15.03916373	1.9148619569999998	7.58	1.3	1.93	5.01	-4.3	1.59	0.89
Ag-M-Ag-Ni	-0.21201399999999998	0.976946085	-3.874315283	1.1999204909999999	2.622452118	14.76185892	1.92397811	7.58	1.3	1.93	5.01	-4.3	1.59	0.89
Ag-M-Ag-Cu	-0.02907	0.9777820429999999	-4.073349255	1.192270495	2.597009614	15.48773187	1.9209506	7.58	1.3	1.93	5.01	-4.3	1.59	0.89
Ag-M-Ag-Zn	-0.11568699999999998	0.980931895	-4.253752522	1.183548669	2.242245956	16.55043749	1.8413455630000002	7.58	1.3	1.93	5.01	-4.3	1.59	0.89
Ag-M-Ag-Mo	-0.32650500000000005	0.9744528290000001	-4.300925792	1.257667538	2.7490882460000003	14.691652900000001	1.9963019990000002	7.58	1.3	1.93	5.01	-4.3	1.59	0.89
Ag-M-Ag-Ru	-0.208132	0.977068895	-3.857327399	1.207494589	2.360175644	12.66432847	2.007321427	7.58	1.3	1.93	5.01	-4.3	1.59	0.89
Ag-M-Ag-Rh	-0.19017799999999999	0.977823432	-3.6393877089999997	1.178107134	2.277297501	12.43463096	2.028946383	7.58	1.3	1.93	5.01	-4.3	1.59	0.89
Ag-M-Ag-Pd	-0.075258	0.980070152	-3.681086717	1.1464267320000001	2.248919663	13.06776181	2.007321427	7.58	1.3	1.93	5.01	-4.3	1.59	0.89
Ag-M-Ag-Ta	-0.25246199999999996	0.973162153	-4.491006622	1.327053451	2.950536908	15.8961988	1.789441454	7.58	1.3	1.93	5.01	-4.3	1.59	0.89
Ag-M-Ag-W	-0.36751999999999996	0.9730624809999999	-4.401788099999999	1.324874672	2.66022888	13.94601353	2.050046524	7.58	1.3	1.93	5.01	-4.3	1.59	0.89
Ag-M-Ag-Re	-0.44067700000000004	0.9739271290000001	-4.1276082469999995	1.306521172	2.33283347	12.04408516	1.9209506	7.58	1.3	1.93	5.01	-4.3	1.59	0.89
Ag-M-Ag-Os	-0.6860430000000001	0.9755385679999999	-3.908472535	1.277404835	2.129103607	11.18821528	2.007321427	7.58	1.3	1.93	5.01	-4.3	1.59	0.89
Ag-M-Ag-Ir	-0.315924	0.9770826220000001	-3.69339604	1.248362827	2.004904406	10.8572778	2.007321427	7.58	1.3	1.93	5.01	-4.3	1.59	0.89
Ag-M-Ag-Pt	-0.08795	0.979162237	-3.6842353169999997	1.207573414	2.022604617	11.92753138	2.028946383	7.58	1.3	1.93	5.01	-4.3	1.59	0.89
Ag-M-Ag-Au	0.041451999999999996	0.980075172	-3.9137819589999996	1.174874993	2.050414365	13.94399378	2.09575365	7.58	1.3	1.93	5.01	-4.3	1.59	0.89
Pt-M-Pt-Sc	-0.535846	0.887332858	-2.671204559	1.9720278919999998	1.0043869029999999	4.454389966	1.952612501	9.0	2.13	2.28	6.74	-2.25	1.53	1.04
Pt-M-Pt-Ti	-0.589184	0.889344516	-2.823090615	1.990453663	0.92001772	4.069095648	2.026798663	9.0	2.13	2.28	6.74	-2.25	1.53	1.04
Pt-M-Pt-V	-0.796769	0.874690064	-2.8056117830000002	2.018763938	0.784680154	3.619322227	2.061629758	9.0	2.13	2.28	6.74	-2.25	1.53	1.04
Pt-M-Pt-Cr	-0.908826	0.880720837	-2.697672155	2.0009408019999997	0.713268108	3.5942229169999997	2.072940417	9.0	2.13	2.28	6.74	-2.25	1.53	1.04
Pt-M-Pt-Fe	-0.699887	0.88431675	-2.407188339	1.888571751	0.560139473	3.6565835239999998	2.134468352	9.0	2.13	2.28	6.74	-2.25	1.53	1.04
Pt-M-Pt-Co	-0.8841540000000001	0.878742853	-2.388466582	1.906120408	0.5112326189999999	3.501053031	2.15179923	9.0	2.13	2.28	6.74	-2.25	1.53	1.04
Pt-M-Pt-Ni	-1.018748	0.8794987009999999	-2.282454765	1.8966792769999998	0.501348302	3.493407229	2.162043378	9.0	2.13	2.28	6.74	-2.25	1.53	1.04
Pt-M-Pt-Cu	-0.9728180000000001	0.881787586	-2.034902404	1.865579537	0.38974635700000004	3.429734318	2.1586412569999998	9.0	2.13	2.28	6.74	-2.25	1.53	1.04
Pt-M-Pt-Zn	-0.643147	0.9029083290000001	-2.463368053	1.913052212	0.297650243	4.277429378	2.069186214	9.0	2.13	2.28	6.74	-2.25	1.53	1.04
Pt-M-Pt-Ga	-0.859641	0.88830249	-2.862341624	2.06013128	0.402410604	4.168102635	2.1274431590000003	9.0	2.13	2.28	6.74	-2.25	1.53	1.04
Pt-M-Pt-Y	-0.38150700000000004	0.8847394690000001	-2.383708349	1.8599318880000002	0.855500855	4.378786143999999	1.890002341	9.0	2.13	2.28	6.74	-2.25	1.53	1.04
Pt-M-Pt-Zr	-0.530775	0.884033746	-2.630025362	1.9733282909999998	0.9229781440000001	4.317695521	1.939589772	9.0	2.13	2.28	6.74	-2.25	1.53	1.04
Pt-M-Pt-Nb	-0.762271	0.880617848	-2.747025825	2.044424754	0.850126485	3.928783293	2.050172424	9.0	2.13	2.28	6.74	-2.25	1.53	1.04
Pt-M-Pt-Mo	-0.873735	0.8736080509999999	-2.682044989	2.02531532	0.6927789240000001	3.550061085	2.243316333	9.0	2.13	2.28	6.74	-2.25	1.53	1.04
Pt-M-Pt-Ru	-1.239252	0.874957462	-2.416849692	1.9323878019999998	0.44049720600000003	3.2948803160000004	2.25569926	9.0	2.13	2.28	6.74	-2.25	1.53	1.04
Pt-M-Pt-Rh	-1.298442	0.872095499	-2.279423625	1.915094368	0.395119899	3.3058098639999995	2.28	9.0	2.13	2.28	6.74	-2.25	1.53	1.04
Pt-M-Pt-Pd	-1.31936	0.87699701	-1.988884825	1.8234083330000002	0.317361758	3.359763627	2.25569926	9.0	2.13	2.28	6.74	-2.25	1.53	1.04
Pt-M-Pt-Ag	-1.0817299999999999	0.8780293309999999	-1.7486821190000001	1.781533025	0.18598671	3.5449529660000003	2.1688103919999997	9.0	2.13	2.28	6.74	-2.25	1.53	1.04
Pt-M-Pt-In	-0.97546	0.8895278679999999	-2.48204388	1.894839128	0.307736619	4.517335609	2.116802762	9.0	2.13	2.28	6.74	-2.25	1.53	1.04
Pt-M-Pt-Sn	-0.857844	0.889557143	-2.140093414	1.903319152	0.225218358	4.525243811	2.1788694730000002	9.0	2.13	2.28	6.74	-2.25	1.53	1.04
Pt-M-Pt-Ta	-0.809487	0.873709795	-2.796791783	2.1192861030000003	0.8361206520000001	3.876242351	2.0108597009999998	9.0	2.13	2.28	6.74	-2.25	1.53	1.04
Pt-M-Pt-W	-0.8837299999999999	0.87457943	-2.8182772060000003	2.134697235	0.711268435	3.602842883	2.303710988	9.0	2.13	2.28	6.74	-2.25	1.53	1.04
Pt-M-Pt-Re	-1.166713	0.873880558	-2.7158087689999997	2.105950009	0.51444377	3.272314942	2.1586412569999998	9.0	2.13	2.28	6.74	-2.25	1.53	1.04
Pt-M-Pt-Os	-1.3500299999999998	0.874819302	-2.595754507	2.057533526	0.37167417700000005	3.1672090460000004	2.25569926	9.0	2.13	2.28	6.74	-2.25	1.53	1.04
Pt-M-Pt-Ir	-1.3861809999999999	0.873547972	-2.433655996	2.01247543	0.27430120399999997	3.1824519639999997	2.25569926	9.0	2.13	2.28	6.74	-2.25	1.53	1.04
Pt-M-Pt-Au	-1.251001	0.8799302	-1.850864183	1.826204395	0.08626699199999999	3.424493001	2.355073729	9.0	2.13	2.28	6.74	-2.25	1.53	1.04
Pd-M-Pd-Sc	-0.46142799999999995	0.9272928659999999	-2.5199491640000002	1.5522844869999999	1.3834054059999998	6.087646817	1.904397265	8.34	0.56	2.2	5.9	-1.83	1.52	0.94
Pd-M-Pd-Ti	-0.534493	0.922739833	-2.564267101	1.561574165	1.193481733	5.165323494	1.976751572	8.34	0.56	2.2	5.9	-1.83	1.52	0.94
Pd-M-Pd-V	-0.6761520000000001	0.915035898	-2.591619545	1.597598654	1.049632634	4.614176068	2.010722593	8.34	0.56	2.2	5.9	-1.83	1.52	0.94
Pd-M-Pd-Cr	-0.159128	0.9195488820000001	-2.425398181	1.580669275	0.934960841	4.504997002	2.021753963	8.34	0.56	2.2	5.9	-1.83	1.52	0.94
Pd-M-Pd-Fe	-0.650995	0.922565257	-2.170611616	1.494055959	0.7337466020000001	4.5709338	2.081762607	8.34	0.56	2.2	5.9	-1.83	1.52	0.94
Pd-M-Pd-Co	-0.828996	0.9201924140000001	-2.158040426	1.509063131	0.6744423340000001	4.361195152	2.098665539	8.34	0.56	2.2	5.9	-1.83	1.52	0.94
Pd-M-Pd-Ni	-0.9332739999999999	0.919277757	-1.988019881	1.4912597140000001	0.659383685	4.322634594	2.108656732	8.34	0.56	2.2	5.9	-1.83	1.52	0.94
Pd-M-Pd-Cu	-0.9065610000000001	0.9229777790000001	-1.742842651	1.4544438919999998	0.540186402	4.282721801	2.105338619	8.34	0.56	2.2	5.9	-1.83	1.52	0.94
Pd-M-Pd-Zn	-0.687361	0.9363063159999999	-2.1735759480000003	1.5125973730000002	0.163383879	5.731439577000001	2.01809246	8.34	0.56	2.2	5.9	-1.83	1.52	0.94
Pd-M-Pd-Ga	-0.886231	0.9283334000000001	-2.56553559	1.672823924	0.38055309200000004	5.942060172000001	2.074910885	8.34	0.56	2.2	5.9	-1.83	1.52	0.94
Pd-M-Pd-Y	-0.364343	0.923394497	-2.1999911880000003	1.4522658590000002	1.2115003579999999	5.845340577999999	1.843333118	8.34	0.56	2.2	5.9	-1.83	1.52	0.94
Pd-M-Pd-Zr	-0.513219	0.920401403	-2.388929644	1.565084761	1.249585206	5.721240021	1.8916961019999998	8.34	0.56	2.2	5.9	-1.83	1.52	0.94
Pd-M-Pd-Nb	-0.686994	0.9180247890000001	-2.507806344	1.621002312	1.077438956	4.896078298	1.999548172	8.34	0.56	2.2	5.9	-1.83	1.52	0.94
Pd-M-Pd-Mo	-0.807579	0.916635875	-2.418813685	1.603857616	0.858023506	4.275912022	2.18792284	8.34	0.56	2.2	5.9	-1.83	1.52	0.94
Pd-M-Pd-Ru	-1.07944	0.9148028640000001	-2.127336009	1.531920259	0.5260170239999999	3.85124121	2.2	8.34	0.56	2.2	5.9	-1.83	1.52	0.94
Pd-M-Pd-Rh	-1.1437680000000001	0.915454118	-1.9675259319999998	1.4971415719999999	0.495433161	3.9929440339999998	2.223700689	8.34	0.56	2.2	5.9	-1.83	1.52	0.94
Pd-M-Pd-Ag	-0.962124	0.9234882729999999	-1.591544443	1.4037404359999999	0.229305848	4.5945550189999995	2.115256651	8.34	0.56	2.2	5.9	-1.83	1.52	0.94
Pd-M-Pd-In	-0.960359	0.93087697	-2.250500839	1.549024596	0.159589468	7.566489697000001	2.0645332290000002	8.34	0.56	2.2	5.9	-1.83	1.52	0.94
Pd-M-Pd-Sn	-1.0442930000000001	0.9305263429999999	-2.1067109790000003	1.570136982	0.037274554	6.570091462000001	2.125067346	8.34	0.56	2.2	5.9	-1.83	1.52	0.94
Pd-M-Pd-Ta	-0.719438	0.916512677	-2.600474067	1.69065231	1.070714948	4.989575079	1.961206185	8.34	0.56	2.2	5.9	-1.83	1.52	0.94
Pd-M-Pd-W	-0.846144	0.91616129	-2.551172435	1.692883911	0.83843361	4.342838562	2.24682619	8.34	0.56	2.2	5.9	-1.83	1.52	0.94
Pd-M-Pd-Re	-0.9945719999999999	0.9178361859999999	-2.455038777	1.6872165780000001	0.593357049	3.8862300339999996	2.105338619	8.34	0.56	2.2	5.9	-1.83	1.52	0.94
Pd-M-Pd-Os	-1.157111	0.9137105879999999	-2.307671939	1.6610005819999998	0.398295368	3.76175748	2.2	8.34	0.56	2.2	5.9	-1.83	1.52	0.94
Pd-M-Pd-Ir	-1.261066	0.9161486109999999	-2.142001642	1.599590106	0.28999536600000003	3.8913336000000003	2.2	8.34	0.56	2.2	5.9	-1.83	1.52	0.94
Pd-M-Pd-Pt	-1.2822799999999999	0.9213774859999999	-1.8694511619999998	1.512013705	0.20665747	4.002521055	2.223700689	8.34	0.56	2.2	5.9	-1.83	1.52	0.94
Pd-M-Pd-Au	-1.1001530000000002	0.9249082820000001	-1.6495198359999999	1.450175021	0.058624814000000004	4.468976586	2.296920647	8.34	0.56	2.2	5.9	-1.83	1.52	0.94
Ni-M-Ni-Sc	-1.008743	0.8785319890000001	-1.3524689140000001	1.310921077	1.056759161	6.156921787000001	1.724983835	7.64	1.16	1.91	5.77	-1.29	1.38	0.71
Ni-M-Ni-Ti	-1.11191	0.876104393	-1.453256879	1.36249966	0.9559792579999999	5.58452183	1.790521636	7.64	1.16	1.91	5.77	-1.29	1.38	0.71
Ni-M-Ni-V	-1.26163	0.8723539109999999	-1.591291895	1.4165732469999999	0.841860475	5.17205151	1.821292245	7.64	1.16	1.91	5.77	-1.29	1.38	0.71
Ni-M-Ni-Cr	-1.317668	0.8686144570000001	-1.5756881580000002	1.401397715	0.6737802079999999	4.900587582	1.831284348	7.64	1.16	1.91	5.77	-1.29	1.38	0.71
Ni-M-Ni-Mn	-1.385189	0.86562572	-1.5235393	1.4006850259999999	0.590439635	4.934461098	1.7344870369999998	7.64	1.16	1.91	5.77	-1.29	1.38	0.71
Ni-M-Ni-Fe	-1.225437	0.8691337790000001	-1.4237201380000002	1.38205788	0.56337847	5.044497906	1.8856395730000002	7.64	1.16	1.91	5.77	-1.29	1.38	0.71
Ni-M-Ni-Co	-1.317358	0.868437604	-1.531884557	1.399576933	0.497164129	4.931796439	1.9009500780000002	7.64	1.16	1.91	5.77	-1.29	1.38	0.71
Ni-M-Ni-Cu	-1.343061	0.875664845	-1.142883571	1.298632465	0.301462998	5.405059994	1.9069944859999999	7.64	1.16	1.91	5.77	-1.29	1.38	0.71
Ni-M-Ni-Zn	-1.247474	0.8802303509999999	-1.269751798	1.338555948	0.032274909	7.959578283	1.827967796	7.64	1.16	1.91	5.77	-1.29	1.38	0.71
Ni-M-Ni-Ga	-1.334088	0.878878575	-1.469417336	1.413190994	0.140072695	7.266202953	1.879433352	7.64	1.16	1.91	5.77	-1.29	1.38	0.71
Ni-M-Ni-Nb	-1.290123	0.8688869929999999	-1.341338801	1.3725667680000002	0.785731104	5.72609067	1.8111705669999998	7.64	1.16	1.91	5.77	-1.29	1.38	0.71
Ni-M-Ni-Mo	-1.444779	0.8713360170000001	-1.449394319	1.398007484	0.607845389	5.40931023	1.981798441	7.64	1.16	1.91	5.77	-1.29	1.38	0.71
Ni-M-Ni-Ru	-1.69082	0.868373506	-1.381295676	1.376108245	0.265616274	5.438182761	1.992737811	7.64	1.16	1.91	5.77	-1.29	1.38	0.71
Ni-M-Ni-Rh	-1.5447959999999998	0.867470016	-1.389012326	1.38825194	0.26500495399999996	5.237230356	2.014205656	7.64	1.16	1.91	5.77	-1.29	1.38	0.71
Ni-M-Ni-Pd	-1.484436	0.8657945109999999	-1.2781206	1.336267082	0.248583382	5.376529733	1.992737811	7.64	1.16	1.91	5.77	-1.29	1.38	0.71
Ni-M-Ni-Ta	-1.331222	0.871145046	-1.441013739	1.414628349	0.7397433720000001	5.7016669339999995	1.7764407819999999	7.64	1.16	1.91	5.77	-1.29	1.38	0.71
Ni-M-Ni-W	-1.4598389999999999	0.8680462090000001	-1.497513336	1.4574303999999998	0.536348258	5.452556642999999	2.035152501	7.64	1.16	1.91	5.77	-1.29	1.38	0.71
Ni-M-Ni-Re	-1.570835	0.870904993	-1.506865638	1.4764493630000002	0.267291432	5.421963782000001	1.9069944859999999	7.64	1.16	1.91	5.77	-1.29	1.38	0.71
Ni-M-Ni-Os	-1.7024259999999998	0.8654514209999999	-1.4564901819999998	1.470619341	0.057918889	5.652465522000001	1.992737811	7.64	1.16	1.91	5.77	-1.29	1.38	0.71
Ni-M-Ni-Ir	-1.638342	0.872645989	-1.402271253	1.43027992	-0.11030519300000001	6.077073532000001	1.992737811	7.64	1.16	1.91	5.77	-1.29	1.38	0.71
Ni-M-Ni-Pt	-1.528324	0.8701325870000001	-1.356272205	1.38721551	-0.000510655	5.794601905	2.014205656	7.64	1.16	1.91	5.77	-1.29	1.38	0.71
Rh-M-Rh-Sc	-0.974886	0.8104463140000001	-1.5037828640000002	1.911136091	0.7725243740000001	3.6015545089999996	1.952612501	7.46	1.14	2.28	5.91	-1.73	1.49	0.99
Rh-M-Rh-Ti	-0.976685	0.810123803	-1.7411732469999999	1.960724677	0.7053749429999999	3.2502205330000002	2.026798663	7.46	1.14	2.28	5.91	-1.73	1.49	0.99
Rh-M-Rh-V	-1.01334	0.794712291	-1.8126448030000002	1.99379682	0.607667465	3.014313535	2.061629758	7.46	1.14	2.28	5.91	-1.73	1.49	0.99
Rh-M-Rh-Cr	-1.2537530000000001	0.791451868	-1.930027245	1.991882324	0.538057616	2.9427110260000005	2.072940417	7.46	1.14	2.28	5.91	-1.73	1.49	0.99
Rh-M-Rh-Mn	-1.542678	0.782542312	-1.844057601	1.95263948	0.49836707799999996	3.01185771	2.030738032	7.46	1.14	2.28	5.91	-1.73	1.49	0.99
Rh-M-Rh-Fe	-1.4013520000000002	0.798377468	-1.515103735	1.84925361	0.40138033100000003	3.167539905	2.134468352	7.46	1.14	2.28	5.91	-1.73	1.49	0.99
Rh-M-Rh-Co	-1.469149	0.795793726	-1.631267627	1.890222738	0.383391198	3.1134374310000004	2.15179923	7.46	1.14	2.28	5.91	-1.73	1.49	0.99
Rh-M-Rh-Ni	-1.549957	0.7923401520000001	-1.608584993	1.86210513	0.391385295	3.1567037819999997	2.162043378	7.46	1.14	2.28	5.91	-1.73	1.49	0.99
Rh-M-Rh-Cu	-1.634954	0.797857429	-1.433581948	1.798407045	0.320202783	3.2797587960000003	2.1586412569999998	7.46	1.14	2.28	5.91	-1.73	1.49	0.99
Rh-M-Rh-Zn	-1.2548219999999999	0.8263461129999999	-1.53130537	1.837032051	0.067210326	3.9694669589999996	2.069186214	7.46	1.14	2.28	5.91	-1.73	1.49	0.99
Rh-M-Rh-Ga	-1.21933	0.8101191	-1.7085561930000002	2.017611519	0.018715378	4.745426641	2.1274431590000003	7.46	1.14	2.28	5.91	-1.73	1.49	0.99
Rh-M-Rh-Y	-0.932665	0.803940388	-1.3730229230000002	1.772945936	0.64124307	3.560188984	1.890002341	7.46	1.14	2.28	5.91	-1.73	1.49	0.99
Rh-M-Rh-Zr	-0.8864799999999999	0.806500585	-1.492453042	1.872004525	0.6368282160000001	3.4101887060000005	1.939589772	7.46	1.14	2.28	5.91	-1.73	1.49	0.99
Rh-M-Rh-Nb	-1.006424	0.8037206240000001	-1.697788712	1.985340081	0.623350006	3.2494446439999995	2.050172424	7.46	1.14	2.28	5.91	-1.73	1.49	0.99
Rh-M-Rh-Mo	-1.179049	0.790983621	-1.7904331969999998	2.006558545	0.48129596	2.9569104680000002	2.243316333	7.46	1.14	2.28	5.91	-1.73	1.49	0.99
Rh-M-Rh-Ru	-1.5896549999999998	0.786234271	-1.716020487	1.9153569769999998	0.289684327	2.994031937	2.25569926	7.46	1.14	2.28	5.91	-1.73	1.49	0.99
Rh-M-Rh-Pd	-1.828428	0.794966068	-1.529294798	1.798281483	0.245312721	3.236421268	2.25569926	7.46	1.14	2.28	5.91	-1.73	1.49	0.99
Rh-M-Rh-Ag	-1.8160889999999998	0.78846455	-1.2880833790000001	1.730709885	0.165278584	3.541283092	2.1688103919999997	7.46	1.14	2.28	5.91	-1.73	1.49	0.99
Rh-M-Rh-In	-1.4536120000000001	0.811732509	-1.584951369	1.8802479619999999	0.069052791	4.801125745	2.116802762	7.46	1.14	2.28	5.91	-1.73	1.49	0.99
Rh-M-Rh-Sn	-1.6954099999999999	0.8118595000000001	-1.7739061319999998	1.987830758	-0.036673842000000005	4.687841231	2.1788694730000002	7.46	1.14	2.28	5.91	-1.73	1.49	0.99
Rh-M-Rh-Ta	-1.004815	0.800521371	-1.714999581	2.037092596	0.60474733	3.28976507	2.0108597009999998	7.46	1.14	2.28	5.91	-1.73	1.49	0.99
Rh-M-Rh-W	-1.1564510000000001	0.792234668	-1.8603653359999999	2.090825983	0.467945703	3.028165885	2.303710988	7.46	1.14	2.28	5.91	-1.73	1.49	0.99
Rh-M-Rh-Re	-1.331473	0.795900339	-1.986090779	2.1012352869999997	0.321986325	2.907446999	2.1586412569999998	7.46	1.14	2.28	5.91	-1.73	1.49	0.99
Rh-M-Rh-Os	-1.537747	0.7927496	-1.9063158119999999	2.0530094930000002	0.19099238600000001	2.9755986119999998	2.25569926	7.46	1.14	2.28	5.91	-1.73	1.49	0.99
Rh-M-Rh-Ir	-1.692086	0.796345283	-1.827017504	1.977847881	0.105859144	3.1422871860000003	2.25569926	7.46	1.14	2.28	5.91	-1.73	1.49	0.99
Rh-M-Rh-Pt	-1.907659	0.7897964279999999	-1.593814076	1.87512711	0.058788695	3.3155292239999996	2.28	7.46	1.14	2.28	5.91	-1.73	1.49	0.99
Rh-M-Rh-Au	-1.9095810000000002	0.798651088	-1.4107527290000001	1.779261941	0.043441583	3.573566475	2.355073729	7.46	1.14	2.28	5.91	-1.73	1.49	0.99
Ir-M-Ir-Sc	-1.155615	0.791418918	-1.7384574130000001	2.295444427	0.524442617	3.0349888480000002	1.904397265	9.1	1.57	2.2	6.63	-2.11	1.5	1.08
Ir-M-Ir-Ti	-1.161359	0.7909689870000001	-1.95523802	2.35989534	0.5170900829999999	2.8385035210000003	1.976751572	9.1	1.57	2.2	6.63	-2.11	1.5	1.08
Ir-M-Ir-V	-1.156824	0.77685954	-2.068625338	2.389982397	0.449626531	2.65611243	2.010722593	9.1	1.57	2.2	6.63	-2.11	1.5	1.08
Ir-M-Ir-Cr	-1.393504	0.770433583	-2.1401042340000003	2.379993935	0.39348467600000003	2.595957596	2.021753963	9.1	1.57	2.2	6.63	-2.11	1.5	1.08
Ir-M-Ir-Mn	-0.712551	0.77098838	-2.004364882	2.350609761	0.351672098	2.678486756	1.980593667	9.1	1.57	2.2	6.63	-2.11	1.5	1.08
Ir-M-Ir-Fe	-1.545139	0.779638123	-1.893403184	2.260732035	0.291180895	2.750033005	2.081762607	9.1	1.57	2.2	6.63	-2.11	1.5	1.08
Ir-M-Ir-Co	-1.5874219999999999	0.775705449	-1.947246239	2.2844862519999998	0.275857902	2.698989521	2.098665539	9.1	1.57	2.2	6.63	-2.11	1.5	1.08
Ir-M-Ir-Ni	-1.6280540000000001	0.7738712390000001	-1.935979921	2.261314937	0.279695929	2.739591182	2.108656732	9.1	1.57	2.2	6.63	-2.11	1.5	1.08
Ir-M-Ir-Cu	-1.7109830000000001	0.780303825	-1.766685241	2.2158923280000002	0.194624078	2.790609763	2.105338619	9.1	1.57	2.2	6.63	-2.11	1.5	1.08
Ir-M-Ir-Zn	-1.3776899999999999	0.7961880090000001	-1.7701762890000001	2.2330976369999997	0.07231804	3.181011862	2.01809246	9.1	1.57	2.2	6.63	-2.11	1.5	1.08
Ir-M-Ir-Ga	-1.328638	0.7917582540000001	-1.983685441	2.392053635	0.029434078	3.438255298	2.074910885	9.1	1.57	2.2	6.63	-2.11	1.5	1.08
Ir-M-Ir-Y	-1.09789	0.77972384	-1.6365586730000001	2.164230039	0.406289829	3.03349193	1.843333118	9.1	1.57	2.2	6.63	-2.11	1.5	1.08
Ir-M-Ir-Zr	-1.11553	0.7894740020000001	-1.7390341280000001	2.253029262	0.43111561	2.92867567	1.8916961019999998	9.1	1.57	2.2	6.63	-2.11	1.5	1.08
Ir-M-Ir-Nb	-1.210508	0.780364342	-1.86654655	2.374613129	0.43906788	2.774868285	1.999548172	9.1	1.57	2.2	6.63	-2.11	1.5	1.08
Ir-M-Ir-Mo	-1.3135629999999998	0.772118273	-2.043806495	2.405659108	0.37002406200000004	2.6151157069999997	2.18792284	9.1	1.57	2.2	6.63	-2.11	1.5	1.08
Ir-M-Ir-Ru	-1.707239	0.7617009159999999	-1.9655837680000001	2.323765295	0.20364751899999997	2.562123042	2.2	9.1	1.57	2.2	6.63	-2.11	1.5	1.08
Ir-M-Ir-Rh	-1.7630430000000001	0.7738004820000001	-2.022857262	2.295786836	0.18703636199999998	2.667664734	2.223700689	9.1	1.57	2.2	6.63	-2.11	1.5	1.08
Ir-M-Ir-Pd	-1.973493	0.771084069	-1.815737711	2.209335581	0.140376878	2.74656985	2.2	9.1	1.57	2.2	6.63	-2.11	1.5	1.08
Ir-M-Ir-Ag	-1.866961	0.7856781429999999	-1.643273126	2.136404024	0.077121224	2.934356885	2.115256651	9.1	1.57	2.2	6.63	-2.11	1.5	1.08
Ir-M-Ir-In	-1.602106	0.79248891	-1.88555971	2.244369022	0.079694803	3.3843014080000002	2.0645332290000002	9.1	1.57	2.2	6.63	-2.11	1.5	1.08
Ir-M-Ir-Sn	-1.991196	0.796661356	-2.093612673	2.388277414	-0.050948607	3.596520876	2.125067346	9.1	1.57	2.2	6.63	-2.11	1.5	1.08
Ir-M-Ir-Ta	-1.193924	0.780926663	-1.934540529	2.433159851	0.447078509	2.807582392	1.961206185	9.1	1.57	2.2	6.63	-2.11	1.5	1.08
Ir-M-Ir-W	-1.2779200000000002	0.773979385	-2.131834618	2.500347331	0.372740099	2.6262577680000003	2.24682619	9.1	1.57	2.2	6.63	-2.11	1.5	1.08
Ir-M-Ir-Re	-1.489483	0.771994066	-2.1738621069999997	2.505362496	0.261221301	2.54301245	2.105338619	9.1	1.57	2.2	6.63	-2.11	1.5	1.08
Ir-M-Ir-Os	-1.6491369999999999	0.768014416	-2.1445940080000003	2.472220134	0.151768501	2.5282749840000003	2.2	9.1	1.57	2.2	6.63	-2.11	1.5	1.08
Ir-M-Ir-Pt	-2.0511049999999997	0.768904423	-1.929956997	2.3080711	0.028101551000000002	2.717129256	2.223700689	9.1	1.57	2.2	6.63	-2.11	1.5	1.08
Ir-M-Ir-Au	-2.039239	0.78113693	-1.7102343919999998	2.185508028	-0.022449675	2.8899428339999997	2.296920647	9.1	1.57	2.2	6.63	-2.11	1.5	1.08
Re-M-Re-Sc	-1.405872	0.5907140470000001	-0.577658974	2.466073147	0.266647676	2.367711452	1.7186569280000001	7.88	0.15	1.9	5.88	-0.51	1.52	1.2
Re-M-Re-Ti	-1.352817	0.602242639	-0.675347776	2.498852551	0.23887939800000002	2.250025315	1.78395435	7.88	0.15	1.9	5.88	-0.51	1.52	1.2
Re-M-Re-V	-1.595134	0.589007352	-0.647011102	2.560775505	0.167176409	2.135563443	1.8146120980000002	7.88	0.15	1.9	5.88	-0.51	1.52	1.2
Re-M-Re-Cr	-1.649636	0.589035851	-0.641393316	2.63517608	0.107578156	2.071023606	1.824567552	7.88	0.15	1.9	5.88	-0.51	1.52	1.2
Re-M-Re-Fe	-1.685024	0.583615777	-0.787517457	2.561364512	0.087500545	2.206935464	1.8787234130000001	7.88	0.15	1.9	5.88	-0.51	1.52	1.2
Re-M-Re-Co	-1.6947860000000001	0.584186844	-0.8859424990000001	2.605274923	0.081471658	2.208170682	1.8939777619999998	7.88	0.15	1.9	5.88	-0.51	1.52	1.2
Re-M-Re-Ni	-1.7100330000000001	0.584125832	-0.857468273	2.5729639559999997	0.084823336	2.2695019469999997	1.90299449	7.88	0.15	1.9	5.88	-0.51	1.52	1.2
Re-M-Re-Cu	-1.764879	0.5817731979999999	-0.7612421890000001	2.500131336	0.059217255999999996	2.418661123	1.9	7.88	0.15	1.9	5.88	-0.51	1.52	1.2
Re-M-Re-Zn	-1.7215099999999999	0.602599897	-0.782946892	2.503551078	-0.058843936	2.759906869	1.821263164	7.88	0.15	1.9	5.88	-0.51	1.52	1.2
Re-M-Re-Ga	-1.7801580000000001	0.594950671	-0.89239635	2.603885262	-0.19685177199999998	3.1377865330000003	1.872539955	7.88	0.15	1.9	5.88	-0.51	1.52	1.2
Re-M-Re-Y	-1.472328	0.580980857	-0.598437867	2.361913308	0.212099872	2.419278597	1.663548511	7.88	0.15	1.9	5.88	-0.51	1.52	1.2
Re-M-Re-Zr	-1.3760649999999999	0.581228699	-0.601630745	2.439599294	0.21804896399999998	2.355804515	1.707194539	7.88	0.15	1.9	5.88	-0.51	1.52	1.2
Re-M-Re-Nb	-1.374911	0.580869658	-0.668691203	2.539883029	0.19350056	2.253874722	1.8045275440000001	7.88	0.15	1.9	5.88	-0.51	1.52	1.2
Re-M-Re-Mo	-1.616606	0.582049666	-0.631433074	2.625776439	0.107225275	2.1396891769999997	1.9745295880000002	7.88	0.15	1.9	5.88	-0.51	1.52	1.2
Re-M-Re-Ru	-1.63959	0.577270183	-0.9083003479999999	2.7004918769999997	-0.020500616	2.120289353	1.985428835	7.88	0.15	1.9	5.88	-0.51	1.52	1.2
Re-M-Re-Rh	-1.833457	0.573971398	-0.885144962	2.633073895	-0.036077446	2.229023915	2.00681794	7.88	0.15	1.9	5.88	-0.51	1.52	1.2
Re-M-Re-Pd	-1.8773119999999999	0.5823292170000001	-0.8539864420000001	2.539634712	-0.046481142999999996	2.373835119	1.985428835	7.88	0.15	1.9	5.88	-0.51	1.52	1.2
Re-M-Re-Ag	-2.0428830000000002	0.584927859	-0.7701388459999999	2.439857019	-0.037534045	2.614502537	1.9089507030000001	7.88	0.15	1.9	5.88	-0.51	1.52	1.2
Re-M-Re-In	-1.993157	0.589692665	-0.8118660190000001	2.4882798409999998	-0.20879986399999997	3.4562949260000004	1.8631744559999999	7.88	0.15	1.9	5.88	-0.51	1.52	1.2
Re-M-Re-Sn	-1.737695	0.599543646	-1.0571798620000001	2.634177666	-0.239696379	3.404532715	1.917804539	7.88	0.15	1.9	5.88	-0.51	1.52	1.2
Re-M-Re-Ta	-1.2836450000000001	0.5821163429999999	-0.736522903	2.597396451	0.194181364	2.279767033	1.7699251409999999	7.88	0.15	1.9	5.88	-0.51	1.52	1.2
Re-M-Re-W	-1.603804	0.583822826	-0.693247093	2.699237311	0.108471966	2.187116863	2.027687956	7.88	0.15	1.9	5.88	-0.51	1.52	1.2
Re-M-Re-Os	-1.588865	0.5894547410000001	-1.042366188	2.870830733	-0.067010368	2.1535061630000003	1.985428835	7.88	0.15	1.9	5.88	-0.51	1.52	1.2
Re-M-Re-Ir	-1.814456	0.5844256760000001	-1.007733559	2.7823612630000003	-0.13740992900000001	2.294799591	1.985428835	7.88	0.15	1.9	5.88	-0.51	1.52	1.2
Re-M-Re-Pt	-1.8674689999999998	0.586529587	-0.959063317	2.687605673	-0.165811077	2.450160755	2.00681794	7.88	0.15	1.9	5.88	-0.51	1.52	1.2
Re-M-Re-Au	-2.052377	0.58150007	-0.837835305	2.547586876	-0.170430062	2.709635136	2.072896583	7.88	0.15	1.9	5.88	-0.51	1.52	1.2
Re-M-Re-Tl	-2.2691049999999997	0.58602212	-0.787016243	2.490209725	-0.413292769	4.389585946	1.811265125	7.88	0.15	1.9	5.88	-0.51	1.52	1.2
Co-M-Co-Sc	-1.193337	0.775606334	-1.249661583	1.552192912	0.601136632	3.8005039760000003	1.7059730530000001	7.88	0.66	1.88	5.76	-1.17	1.39	0.76
Co-M-Co-V	-1.467359	0.7814264870000001	-1.084130875	1.571075411	0.418131112	3.6819754239999996	1.760176416	7.88	0.66	1.88	5.76	-1.17	1.39	0.76
Co-M-Co-Cr	-1.4175959999999999	0.7756225529999999	-1.259438031	1.5995452159999999	0.343226473	3.5964103119999997	1.775054965	7.88	0.66	1.88	5.76	-1.17	1.39	0.76
Co-M-Co-Fe	-1.3829719999999999	0.7700642440000001	-1.3295254490000001	1.6928373719999998	0.39535444	3.337990128	1.864858229	7.88	0.66	1.88	5.76	-1.17	1.39	0.76
Co-M-Co-Ni	-1.439134	0.763888062	-1.406729484	1.7219782369999999	0.325802688	3.2860474230000003	1.893787149	7.88	0.66	1.88	5.76	-1.17	1.39	0.76
Co-M-Co-Cu	-1.452116	0.769816968	-1.348179412	1.6613467480000002	0.290520664	3.465210547	1.8859777930000001	7.88	0.66	1.88	5.76	-1.17	1.39	0.76
Co-M-Co-Zn	-1.413537	0.77931055	-1.36307784	1.6615153409999999	0.107846875	4.543652541	1.8078220440000001	7.88	0.66	1.88	5.76	-1.17	1.39	0.76
Co-M-Co-Ga	-1.446804	0.773679844	-1.3310824490000002	1.68076928	0.08571424400000001	4.622101946	1.858720406	7.88	0.66	1.88	5.76	-1.17	1.39	0.76
Co-M-Co-Ag	-1.508081	0.764873557	-1.284156651	1.628445833	0.227252818	3.8336483639999996	1.89486244	7.88	0.66	1.88	5.76	-1.17	1.39	0.76
Co-M-Co-Ta	-1.437559	0.768272877	-1.259788892	1.652285494	0.420398592	3.6816752310000003	1.7568629009999999	7.88	0.66	1.88	5.76	-1.17	1.39	0.76
Ru-M-Ru-Sc	-1.367679	0.7392423929999999	-1.120155743	1.90931259	0.428780636	2.680619134	1.904397265	7.36	1.05	2.2	5.73	-1.41	1.48	1.05
Ru-M-Ru-Cr	-1.252157	0.734828315	-1.462653762	2.078895891	0.23392112899999998	2.190906926	2.021753963	7.36	1.05	2.2	5.73	-1.41	1.48	1.05
Ru-M-Ru-Mn	-1.623939	0.7223600659999999	-1.496920271	2.096108356	0.26245825899999997	2.368309136	1.980593667	7.36	1.05	2.2	5.73	-1.41	1.48	1.05
Ru-M-Ru-Fe	-1.6204	0.7207569490000001	-1.2947740620000001	1.9885538930000002	0.232922682	2.59806888	2.081762607	7.36	1.05	2.2	5.73	-1.41	1.48	1.05
Ru-M-Ru-Co	-1.686653	0.714282374	-1.32557495	2.029016024	0.21133965100000002	2.59253235	2.098665539	7.36	1.05	2.2	5.73	-1.41	1.48	1.05
Ru-M-Ru-Ni	-1.788587	0.709510547	-1.309519026	1.986679729	0.22478087600000002	2.668393173	2.108656732	7.36	1.05	2.2	5.73	-1.41	1.48	1.05
Ru-M-Ru-Cu	-1.870832	0.7144735609999999	-1.167123512	1.945451751	0.164963939	2.8137836569999997	2.105338619	7.36	1.05	2.2	5.73	-1.41	1.48	1.05
Ru-M-Ru-Zn	-1.6782869999999999	0.731829793	-1.18695133	1.961883171	-0.039369552	3.475765958	2.01809246	7.36	1.05	2.2	5.73	-1.41	1.48	1.05
Ru-M-Ru-Ga	-1.339431	0.7356918570000001	-1.243773929	2.143890647	-0.22378360100000003	4.5136800919999995	2.074910885	7.36	1.05	2.2	5.73	-1.41	1.48	1.05
Ru-M-Ru-Y	-1.5259280000000002	0.719169548	-1.035277325	1.859229981	0.434427843	2.8986013039999996	1.843333118	7.36	1.05	2.2	5.73	-1.41	1.48	1.05
Ru-M-Ru-Zr	-1.389138	0.719594988	-1.0281155659999999	1.9423319190000001	0.42043106700000005	2.7675864619999997	1.8916961019999998	7.36	1.05	2.2	5.73	-1.41	1.48	1.05
Ru-M-Ru-Nb	-1.42451	0.728192562	-1.063838024	2.065079071	0.35454888	2.573258025	1.999548172	7.36	1.05	2.2	5.73	-1.41	1.48	1.05
Ru-M-Ru-Mo	-1.303856	0.72399971	-1.187075467	2.152596696	0.241472507	2.364638589	2.18792284	7.36	1.05	2.2	5.73	-1.41	1.48	1.05
Ru-M-Ru-Rh	-1.875318	0.716147649	-1.3948845380000001	2.029952516	0.08168517900000001	2.599588395	2.223700689	7.36	1.05	2.2	5.73	-1.41	1.48	1.05
Ru-M-Ru-Pd	-1.989843	0.710297615	-1.288689015	1.946368047	0.049727727	2.7598145439999997	2.2	7.36	1.05	2.2	5.73	-1.41	1.48	1.05
Ru-M-Ru-Ag	-1.993151	0.711942636	-1.0975676109999999	1.9059929930000001	0.040037907000000005	3.050098534	2.115256651	7.36	1.05	2.2	5.73	-1.41	1.48	1.05
Ru-M-Ru-In	-1.6219569999999999	0.7301236320000001	-1.213390607	2.017927004	-0.204260997	4.775580556	2.0645332290000002	7.36	1.05	2.2	5.73	-1.41	1.48	1.05
Ru-M-Ru-Sn	-1.743729	0.731332072	-1.346839347	2.182061176	-0.31574703600000004	4.459871512	2.125067346	7.36	1.05	2.2	5.73	-1.41	1.48	1.05
Ru-M-Ru-Ta	-1.434978	0.7321758279999999	-1.10408916	2.1277381440000003	0.35091292399999996	2.662932442	1.961206185	7.36	1.05	2.2	5.73	-1.41	1.48	1.05
Ru-M-Ru-W	-1.3245360000000002	0.734165062	-1.223239851	2.239855674	0.255345155	2.5123775740000003	2.24682619	7.36	1.05	2.2	5.73	-1.41	1.48	1.05
Ru-M-Ru-Os	-1.720379	0.7211090029999999	-1.533173989	2.230557845	0.000851871	2.518747635	2.2	7.36	1.05	2.2	5.73	-1.41	1.48	1.05
Ru-M-Ru-Ir	-1.88736	0.7113405970000001	-1.421144934	2.143146765	-0.09181417	2.711083214	2.2	7.36	1.05	2.2	5.73	-1.41	1.48	1.05
Ru-M-Ru-Pt	-1.9819849999999999	0.7087633390000001	-1.3566869819999998	2.060549385	-0.128917518	2.916962805	2.223700689	7.36	1.05	2.2	5.73	-1.41	1.48	1.05
Ru-M-Ru-Au	-2.04433	0.713228282	-1.178603349	1.973865084	-0.123424851	3.1998207119999997	2.296920647	7.36	1.05	2.2	5.73	-1.41	1.48	1.05
Os-M-Os-Sc	-1.514879	0.719443563	-1.369706076	2.317019585	0.276449834	2.513431691	1.904397265	8.7	1.1	2.2	6.25	-1.5	1.49	1.13
Os-M-Os-Ti	-1.5277180000000001	0.734772925	-1.439738451	2.373531079	0.269134654	2.3802364430000003	1.976751572	8.7	1.1	2.2	6.25	-1.5	1.49	1.13
Os-M-Os-V	-1.521924	0.7283698120000001	-1.493939266	2.480486102	0.206316401	2.184506115	2.010722593	8.7	1.1	2.2	6.25	-1.5	1.49	1.13
Os-M-Os-Cr	-1.3882709999999998	0.7117247179999999	-1.607067944	2.539489943	0.17870382899999998	2.132081274	2.021753963	8.7	1.1	2.2	6.25	-1.5	1.49	1.13
Os-M-Os-Fe	-1.7134459999999998	0.695304776	-1.505406644	2.4938242269999997	0.18388640399999998	2.362442747	2.081762607	8.7	1.1	2.2	6.25	-1.5	1.49	1.13
Os-M-Os-Co	-1.8581590000000001	0.686977475	-1.5302873119999998	2.518333203	0.17158174199999998	2.3483097180000003	2.098665539	8.7	1.1	2.2	6.25	-1.5	1.49	1.13
Os-M-Os-Cu	-1.997757	0.693346329	-1.4026743419999999	2.423145816	0.12152588	2.511675738	2.105338619	8.7	1.1	2.2	6.25	-1.5	1.49	1.13
Os-M-Os-Y	-1.704379	0.6997668659999999	-1.272263358	2.312284154	0.274883662	2.621901797	1.843333118	8.7	1.1	2.2	6.25	-1.5	1.49	1.13
Os-M-Os-Zr	-1.6021	0.704370726	-1.280940261	2.397569584	0.281693611	2.5169746319999997	1.8916961019999998	8.7	1.1	2.2	6.25	-1.5	1.49	1.13
Os-M-Os-Nb	-1.506753	0.716949402	-1.317926463	2.511457364	0.25778019399999996	2.37658862	1.999548172	8.7	1.1	2.2	6.25	-1.5	1.49	1.13
Os-M-Os-Mo	-1.469918	0.707297594	-1.385800015	2.634174981	0.195034827	2.217167239	2.18792284	8.7	1.1	2.2	6.25	-1.5	1.49	1.13
Os-M-Os-Ru	-1.970691	0.685500381	-1.5609213309999999	2.571161977	0.08694085800000001	2.258994056	2.2	8.7	1.1	2.2	6.25	-1.5	1.49	1.13
Os-M-Os-Rh	-2.042277	0.684576277	-1.5432627890000001	2.53787364	0.06013853	2.339102536	2.223700689	8.7	1.1	2.2	6.25	-1.5	1.49	1.13
Os-M-Os-Ag	-2.286556	0.684074497	-1.308791842	2.356956788	0.013721411000000001	2.671752689	2.115256651	8.7	1.1	2.2	6.25	-1.5	1.49	1.13
Os-M-Os-Ta	-1.473283	0.717205448	-1.35343068	2.578678047	0.269227922	2.408974145	1.961206185	8.7	1.1	2.2	6.25	-1.5	1.49	1.13
Os-M-Os-W	-1.490756	0.7111280520000001	-1.380330598	2.726344675	0.210383044	2.276010999	2.24682619	8.7	1.1	2.2	6.25	-1.5	1.49	1.13
Os-M-Os-Re	-1.5297120000000002	0.771634622	-2.190493064	2.445958606	-0.003612298	2.206134127	2.105338619	8.7	1.1	2.2	6.25	-1.5	1.49	1.13
Os-M-Os-Ir	-2.0104509999999998	0.6886236040000001	-1.632722946	2.658424499	-0.043487887	2.362805954	2.2	8.7	1.1	2.2	6.25	-1.5	1.49	1.13
Os-M-Os-Au	-2.370341	0.685800649	-1.4171794359999998	2.435770584	-0.09010234800000001	2.706076093	2.296920647	8.7	1.1	2.2	6.25	-1.5	1.49	1.13
Cr-M-Cr-Sc	-2.187693	0.569016824	-0.294135684	1.395251764	-0.17729287600000002	2.334956838	1.563642025	6.77	0.67	1.66	5.27	0.16	1.42	0.9
Cr-M-Cr-Ti	-1.8975400000000002	0.57183994	-0.299576697	1.461315191	-0.18212909800000002	2.321631233	1.623049921	6.77	0.67	1.66	5.27	0.16	1.42	0.9
Cr-M-Cr-V	-1.716247	0.572632955	-0.316929568	1.506447537	-0.23861588	2.312936173	1.6509424819999998	6.77	0.67	1.66	5.27	0.16	1.42	0.9
Cr-M-Cr-Mn	-1.8137990000000002	0.5717999429999999	-0.33764131399999997	1.6381506869999998	-0.403221458	2.387250597	1.626204547	6.77	0.67	1.66	5.27	0.16	1.42	0.9
Cr-M-Cr-Fe	-1.766327	0.554784032	-0.357694003	1.62243601	-0.48820415	2.470222969	1.709271253	6.77	0.67	1.66	5.27	0.16	1.42	0.9
Cr-M-Cr-Ni	-2.118357	0.538086987	-0.404762478	1.633306476	-0.566100968	2.777522563	1.731353191	6.77	0.67	1.66	5.27	0.16	1.42	0.9
Cr-M-Cr-Cu	-2.43306	0.5253389479999999	-0.24337892	1.570880812	-0.561494646	3.230541503	1.72862879	6.77	0.67	1.66	5.27	0.16	1.42	0.9
Cr-M-Cr-Ru	-1.836601	0.542893159	-0.302323507	1.7107833909999999	-0.6759455120000001	3.11816363	1.806352339	6.77	0.67	1.66	5.27	0.16	1.42	0.9
W-M-W-Sc	-1.496154	0.583483549	-0.33641345899999997	1.999045907	0.008240744	2.257270394	2.000322751	7.98	0.86	2.36	5.09	0.77	1.56	1.27
W-M-W-Ti	-1.504852	0.609244909	-0.499136035	2.004714641	0.00731075	2.219971249	2.076321583	7.98	0.86	2.36	5.09	0.77	1.56	1.27
W-M-W-V	-1.734418	0.604314174	-0.48657152	2.1491196280000002	-0.023747882	2.125369914	2.1120037419999997	7.98	0.86	2.36	5.09	0.77	1.56	1.27
W-M-W-Cr	-1.864913	0.5918963079999999	-0.459265108	2.203383788	-0.109103613	2.057950513	2.123590767	7.98	0.86	2.36	5.09	0.77	1.56	1.27
W-M-W-Fe	-1.829141	0.548927215	-0.32686114	2.205228273	-0.20167145	2.090390581	2.186622079	7.98	0.86	2.36	5.09	0.77	1.56	1.27
W-M-W-Co	-1.784602	0.537009529	-0.333239176	2.285405616	-0.20434724699999998	2.091899128	2.20437642	7.98	0.86	2.36	5.09	0.77	1.56	1.27
W-M-W-Ni	-1.841836	0.529144297	-0.324657732	2.285467641	-0.203060728	2.168473493	2.214870875	7.98	0.86	2.36	5.09	0.77	1.56	1.27
W-M-W-Cu	-1.8420740000000002	0.51864045	-0.144349371	2.255188796	-0.20063450600000002	2.397256266	2.2113856259999998	7.98	0.86	2.36	5.09	0.77	1.56	1.27
W-M-W-Zn	-1.7623939999999998	0.536353965	-0.16975337	2.297254213	-0.263792566	2.8858854839999997	2.119744833	7.98	0.86	2.36	5.09	0.77	1.56	1.27
W-M-W-Ga	-1.7928220000000001	0.528926557	-0.133305859	2.430434095	-0.459339626	3.589552278	2.179425232	7.98	0.86	2.36	5.09	0.77	1.56	1.27
W-M-W-Y	-1.73639	0.5624668310000001	-0.238747022	2.011174413	-0.022954207	2.2626397380000003	1.936182771	7.98	0.86	2.36	5.09	0.77	1.56	1.27
W-M-W-Zr	-1.6954349999999998	0.561733032	-0.22731778600000002	2.060574335	-0.033156013	2.191550042	1.9869818240000001	7.98	0.86	2.36	5.09	0.77	1.56	1.27
W-M-W-Nb	-1.667072	0.567842996	-0.257447999	2.1126273540000002	-0.054732607999999995	2.154937218	2.100266459	7.98	0.86	2.36	5.09	0.77	1.56	1.27
W-M-W-Mo	-1.8620450000000002	0.56473897	-0.22426346100000003	2.225884267	-0.087904171	2.13105327	2.298129658	7.98	0.86	2.36	5.09	0.77	1.56	1.27
W-M-W-Ru	-1.834006	0.5390889170000001	-0.242484776	2.341179525	-0.268243899	2.134252524	2.310815151	7.98	0.86	2.36	5.09	0.77	1.56	1.27
W-M-W-Rh	-1.7925849999999999	0.52617033	-0.302006968	2.367242169	-0.30837685	2.201878265	2.335709656	7.98	0.86	2.36	5.09	0.77	1.56	1.27
W-M-W-Pd	-1.903166	0.516389355	-0.279534692	2.299461763	-0.3362498	2.389039298	2.310815151	7.98	0.86	2.36	5.09	0.77	1.56	1.27
W-M-W-Ag	-1.9945380000000001	0.514698462	-0.10430848300000001	2.215687167	-0.32191489100000004	2.682638875	2.221803235	7.98	0.86	2.36	5.09	0.77	1.56	1.27
W-M-W-In	-1.859345	0.532602543	-0.195531834	2.323411855	-0.619851052	4.623766166	2.168524848	7.98	0.86	2.36	5.09	0.77	1.56	1.27
W-M-W-Sn	-1.572818	0.542685657	-0.285443147	2.353505944	-0.557648679	3.605899726	2.2321081	7.98	0.86	2.36	5.09	0.77	1.56	1.27
W-M-W-Ta	-1.628225	0.564290465	-0.247544275	2.187846967	-0.074690517	2.17948925	2.059993167	7.98	0.86	2.36	5.09	0.77	1.56	1.27
W-M-W-Re	-1.804791	0.6426360720000001	-0.7525926959999999	2.141206044	-0.289806782	2.342625735	2.2113856259999998	7.98	0.86	2.36	5.09	0.77	1.56	1.27
W-M-W-Os	-1.7518240000000003	0.547736168	-0.313423033	2.474127491	-0.314615043	2.283805542	2.310815151	7.98	0.86	2.36	5.09	0.77	1.56	1.27
W-M-W-Ir	-1.7148900000000002	0.530186833	-0.378876634	2.499199882	-0.405645562	2.388204869	2.310815151	7.98	0.86	2.36	5.09	0.77	1.56	1.27
W-M-W-Pt	-1.8270650000000002	0.523469179	-0.395899479	2.4561955490000003	-0.44845501200000004	2.5699314980000003	2.335709656	7.98	0.86	2.36	5.09	0.77	1.56	1.27
W-M-W-Au	-1.973384	0.5178496260000001	-0.21918793600000003	2.351746082	-0.470849102	2.9020379530000002	2.412617741	7.98	0.86	2.36	5.09	0.77	1.56	1.27
W-M-W-Tl	-1.941381	0.52763793	-0.21985253300000002	2.311034264	-0.911495939	5.642358091	2.108108243	7.98	0.86	2.36	5.09	0.77	1.56	1.27
W-M-W-Pb	-3.825505	0.531308715	-0.23856565100000002	2.20317375	-0.541113153	4.034067973	2.3509596669999997	7.98	0.86	2.36	5.09	0.77	1.56	1.27
Cu-Cu3M-Sc	-0.5368729999999999	0.971534253	-2.384085966	0.9434076440000001	2.0108181519999997	14.54968388	1.837520241	7.73	1.24	1.9	5.3	-2.67	1.41	0.67
Cu-Cu3M-Ti	-0.5766319999999999	0.970463767	-2.47118168	0.991459805	1.661468729	12.19828523	1.860502736	7.73	1.24	1.9	5.3	-2.67	1.41	0.67
Cu-Cu3M-V	-0.588126	0.9699844459999999	-2.386248149	1.012303936	1.466278304	11.05938178	1.871100011	7.73	1.24	1.9	5.3	-2.67	1.41	0.67
Cu-Cu3M-Cr	-0.5521689999999999	0.9711362509999999	-2.313807934	1.007032065	1.397706611	11.01235498	1.87451556	7.73	1.24	1.9	5.3	-2.67	1.41	0.67
Cu-Cu3M-Co	-0.498799	0.970319952	-2.3736619130000003	1.070592305	1.07075958	9.073362681	1.8979904630000002	7.73	1.24	1.9	5.3	-2.67	1.41	0.67
Cu-Cu3M-Ni	-0.426147	0.9706316070000001	-2.349227241	1.0824680770000001	1.02771801	8.819236523999999	1.900997639	7.73	1.24	1.9	5.3	-2.67	1.41	0.67
Cu-Cu3M-Zn	-0.640008	0.972182566	-2.369351406	1.033478856	1.024944515	11.51389462	1.87338326	7.73	1.24	1.9	5.3	-2.67	1.41	0.67
Cu-Cu3M-Ga	-0.530185	0.97123378	-2.405067147	1.044499753	1.014672353	13.38426658	1.890802197	7.73	1.24	1.9	5.3	-2.67	1.41	0.67
Cu-Cu3M-Y	-0.511366	0.9729301490000001	-2.295250805	0.922106523	2.218688666	15.96156517	1.817666587	7.73	1.24	1.9	5.3	-2.67	1.41	0.67
Cu-Cu3M-Zr	-0.5731890000000001	0.970485116	-2.4140231880000003	0.9569188390000001	2.0386853780000003	14.40054573	1.833426081	7.73	1.24	1.9	5.3	-2.67	1.41	0.67
Cu-Cu3M-Nb	-0.606574	0.9695988809999999	-2.424888073	1.000668706	1.675038541	11.99351821	1.86762741	7.73	1.24	1.9	5.3	-2.67	1.41	0.67
Cu-Cu3M-Mo	-0.64285	0.9692939740000001	-2.379537595	1.021606862	1.387546671	10.52228199	1.9245252609999999	7.73	1.24	1.9	5.3	-2.67	1.41	0.67
Cu-Cu3M-Ru	-0.620315	0.9701621840000001	-2.210361819	1.0302167359999999	1.047363875	9.046214048	1.9280598409999998	7.73	1.24	1.9	5.3	-2.67	1.41	0.67
Cu-Cu3M-Rh	-0.5469229999999999	0.9711787590000001	-2.16952748	1.028034873	1.0103831779999999	9.014353622	1.934958815	7.73	1.24	1.9	5.3	-2.67	1.41	0.67
Cu-Cu3M-Pd	-0.510828	0.9730026820000001	-2.176657189	1.008148106	1.051154779	10.02800438	1.9280598409999998	7.73	1.24	1.9	5.3	-2.67	1.41	0.67
Cu-Cu3M-Ag	-0.5522819999999999	0.974059118	-2.228485914	0.98867769	1.06908704	12.12860091	1.902978895	7.73	1.24	1.9	5.3	-2.67	1.41	0.67
Cu-Cu3M-Sn	-0.582466	0.974034071	-2.344113728	0.9774483159999999	1.322144905	15.00966213	1.905916404	7.73	1.24	1.9	5.3	-2.67	1.41	0.67
Cu-Cu3M-Ta	-0.616935	0.9684681479999999	-2.487541562	1.027977692	1.6689831080000002	11.85613148	1.855612831	7.73	1.24	1.9	5.3	-2.67	1.41	0.67
Cu-Cu3M-W	-0.646515	0.9687354309999999	-2.467383432	1.059951881	1.366319056	10.22589839	1.941643267	7.73	1.24	1.9	5.3	-2.67	1.41	0.67
Cu-Cu3M-Re	-0.655324	0.969067592	-2.412960509	1.083239157	1.096904326	8.99833123	1.9	7.73	1.24	1.9	5.3	-2.67	1.41	0.67
Cu-Cu3M-Os	-0.620911	0.969538131	-2.293305307	1.0711926090000001	0.970811474	8.677409394	1.9280598409999998	7.73	1.24	1.9	5.3	-2.67	1.41	0.67
Cu-Cu3M-Ir	-0.556999	0.970916091	-2.2124636069999997	1.061506549	0.8858971090000001	8.685943341	1.9280598409999998	7.73	1.24	1.9	5.3	-2.67	1.41	0.67
Cu-Cu3M-Pt	-0.539704	0.9728377709999999	-2.1811677769999998	1.029085293	0.93211429	9.672889296000001	1.934958815	7.73	1.24	1.9	5.3	-2.67	1.41	0.67
Cu-Cu3M-Au	-0.535905	0.9741705620000001	-2.250390571	1.014630815	0.895191944	11.54324569	1.955967402	7.73	1.24	1.9	5.3	-2.67	1.41	0.67
Cu-Cu3M-Pb	-0.598492	0.975003218	-2.302915261	0.958137845	1.260598105	15.98912793	1.939160843	7.73	1.24	1.9	5.3	-2.67	1.41	0.67
Cu-Cu3M-Bi	-0.625644	0.974523173	-2.274890756	0.974612576	0.864445658	18.08401432	1.911671994	7.73	1.24	1.9	5.3	-2.67	1.41	0.67
Ag-Ag3M-Ti	-0.241015	0.9784570440000001	-4.066493921	1.140130909	2.6696823480000003	17.13456056	1.886920706	7.58	1.3	1.93	5.01	-4.3	1.59	0.89
Ag-Ag3M-V	-0.017653	0.9780882340000001	-3.9988508119999997	1.157285814	2.529171185	16.19808532	1.897668456	7.58	1.3	1.93	5.01	-4.3	1.59	0.89
Ag-Ag3M-Cr	0.038673	0.978715813	-4.0344762339999996	1.156357468	2.5291879930000003	16.39156103	1.9011325030000001	7.58	1.3	1.93	5.01	-4.3	1.59	0.89
Ag-Ag3M-Co	0.07231	0.977948248	-4.078414555	1.22356691	2.074279997	13.21064543	1.924940735	7.58	1.3	1.93	5.01	-4.3	1.59	0.89
Ag-Ag3M-Ni	0.089464	0.9775190109999999	-4.020917288	1.23461673	1.948925235	12.35768057	1.9279906119999999	7.58	1.3	1.93	5.01	-4.3	1.59	0.89
Ag-Ag3M-Cu	0.096743	0.9785890909999999	-4.096793443999999	1.210210104	2.1431611090000002	13.92371897	1.9269788069999998	7.58	1.3	1.93	5.01	-4.3	1.59	0.89
Ag-Ag3M-Zn	-0.027607	0.9792943209999999	-4.019728591	1.171659094	2.163537401	14.927343400000002	1.8999841259999999	7.58	1.3	1.93	5.01	-4.3	1.59	0.89
Ag-Ag3M-Ga	-0.0024519999999999998	0.9785170759999999	-4.007861153	1.1740088340000001	2.274961733	15.93594651	1.917650401	7.58	1.3	1.93	5.01	-4.3	1.59	0.89
Ag-Ag3M-Nb	-0.055094000000000004	0.977541013	-3.9901051260000004	1.14434692	2.685691999	16.74256748	1.894146546	7.58	1.3	1.93	5.01	-4.3	1.59	0.89
Ag-Ag3M-Mo	-0.039365	0.978104802	-3.9012034939999998	1.133851698	2.595716741	16.43058856	1.951852311	7.58	1.3	1.93	5.01	-4.3	1.59	0.89
Ag-Ag3M-Ru	-0.00494	0.977763293	-3.943388316	1.2089964	2.032647221	12.49323824	1.95543708	7.58	1.3	1.93	5.01	-4.3	1.59	0.89
Ag-Ag3M-Rh	0.022763	0.978009048	-3.8698890980000002	1.192750637	2.062936961	12.83657013	1.962434014	7.58	1.3	1.93	5.01	-4.3	1.59	0.89
Ag-Ag3M-Pd	0.058732000000000006	0.979143655	-3.8966070719999997	1.1704512390000001	2.137951686	13.84586331	1.95543708	7.58	1.3	1.93	5.01	-4.3	1.59	0.89
Ag-Ag3M-Ta	-0.070602	0.976058017	-4.09723578	1.194671086	2.599264887	15.7153711	1.881961367	7.58	1.3	1.93	5.01	-4.3	1.59	0.89
Ag-Ag3M-Os	-0.031674	0.9770621509999999	-3.943003515	1.232819157	1.973449002	11.91456291	1.95543708	7.58	1.3	1.93	5.01	-4.3	1.59	0.89
Ag-Ag3M-Ir	0.020358	0.977670921	-3.884184407	1.219838942	1.978375737	12.094005099999999	1.95543708	7.58	1.3	1.93	5.01	-4.3	1.59	0.89
Ag-Ag3M-Pt	0.039622000000000004	0.9786240159999999	-3.8755015839999998	1.1925274609999998	2.063966958	13.11870844	1.962434014	7.58	1.3	1.93	5.01	-4.3	1.59	0.89
Ag-Ag3M-Au	0.041918000000000004	0.979991708	-3.9886255239999997	1.1513323359999998	2.302937784	15.64178951	1.98374091	7.58	1.3	1.93	5.01	-4.3	1.59	0.89
Ni-Ni3M-Sc	-1.3845399999999999	0.877345913	-1.158323778	1.232370573	0.8505405340000001	6.207839517999999	1.846221998	7.64	1.16	1.91	5.77	-1.29	1.38	0.71
Ni-Ni3M-Ti	-1.401314	0.877088931	-1.2509221590000001	1.304347095	0.670088118	5.452458363	1.8693133290000001	7.64	1.16	1.91	5.77	-1.29	1.38	0.71
Ni-Ni3M-V	-1.360918	0.872757015	-1.386622091	1.3515328619999998	0.572367074	5.050926786000001	1.8799607880000002	7.64	1.16	1.91	5.77	-1.29	1.38	0.71
Ni-Ni3M-Co	-1.367063	0.865662405	-1.427583808	1.377518234	0.47095086700000005	4.942833212	1.9069785819999998	7.64	1.16	1.91	5.77	-1.29	1.38	0.71
Ni-Ni3M-Cu	-1.390318	0.870360207	-1.314528649	1.337147914	0.420993347	5.112893557	1.9089976359999998	7.64	1.16	1.91	5.77	-1.29	1.38	0.71
Ni-Ni3M-Zn	-1.392366	0.876712218	-1.29597081	1.305582058	0.35617497600000003	5.80638165	1.88225485	7.64	1.16	1.91	5.77	-1.29	1.38	0.71
Ni-Ni3M-Ga	-1.4082459999999999	0.873215176	-1.2955485409999998	1.32165419	0.296026343	6.854428761	1.899756276	7.64	1.16	1.91	5.77	-1.29	1.38	0.71
Ni-Ni3M-Y	-1.4322540000000001	0.870928033	-1.065371391	1.1759724870000001	0.9445839229999999	6.737673354	1.826274325	7.64	1.16	1.91	5.77	-1.29	1.38	0.71
Ni-Ni3M-Zr	-1.442648	0.876068181	-1.092046471	1.232059932	0.822810723	6.21702789	1.84210845	7.64	1.16	1.91	5.77	-1.29	1.38	0.71
Ni-Ni3M-Nb	-1.369083	0.873569959	-1.281830146	1.313821155	0.688599124	5.597975149	1.8764717419999999	7.64	1.16	1.91	5.77	-1.29	1.38	0.71
Ni-Ni3M-Mo	-1.35804	0.8657190999999999	-1.3388075659999998	1.340970714	0.503829661	5.27960444	1.933639039	7.64	1.16	1.91	5.77	-1.29	1.38	0.71
Ni-Ni3M-Ru	-1.500345	0.870987863	-1.373780339	1.323017052	0.456267494	5.200182841	1.937190357	7.64	1.16	1.91	5.77	-1.29	1.38	0.71
Ni-Ni3M-Rh	-1.501233	0.8669961709999999	-1.344106566	1.319772886	0.426243514	5.203641546	1.9441220019999998	7.64	1.16	1.91	5.77	-1.29	1.38	0.71
Ni-Ni3M-Pd	-1.4997770000000001	0.870476982	-1.311713138	1.286544381	0.400136871	5.426449888	1.937190357	7.64	1.16	1.91	5.77	-1.29	1.38	0.71
Ni-Ni3M-Ag	-1.507627	0.87146857	-1.221159408	1.239658578	0.338820891	5.9650260920000004	1.911990638	7.64	1.16	1.91	5.77	-1.29	1.38	0.71
Ni-Ni3M-In	-1.48243	0.867855936	-1.161010998	1.233619528	-0.018451764	11.23168319	1.896583774	7.64	1.16	1.91	5.77	-1.29	1.38	0.71
Ni-Ni3M-Sn	-1.513967	0.8818102290000001	-1.213817615	1.229044389	0.348975983	7.20341134	1.914942058	7.64	1.16	1.91	5.77	-1.29	1.38	0.71
Ni-Ni3M-La	-1.4333129999999998	0.876757612	-1.0459811509999999	1.171295343	0.9065685379999999	6.552385675	1.807462514	7.64	1.16	1.91	5.77	-1.29	1.38	0.71
Ni-Ni3M-Ta	-1.373294	0.872678211	-1.251224553	1.334631618	0.689386776	5.64229022	1.864400267	7.64	1.16	1.91	5.77	-1.29	1.38	0.71
Ni-Ni3M-W	-1.324503	0.870130535	-1.406191961	1.3788971140000001	0.524371424	5.3273092239999995	1.950838109	7.64	1.16	1.91	5.77	-1.29	1.38	0.71
Ni-Ni3M-Re	-1.394549	0.871717525	-1.4333040890000002	1.391615735	0.38239626200000004	5.16280469	1.9089976359999998	7.64	1.16	1.91	5.77	-1.29	1.38	0.71
Ni-Ni3M-Os	-1.491433	0.8690788359999999	-1.341092417	1.360571644	0.299231273	5.246157881	1.937190357	7.64	1.16	1.91	5.77	-1.29	1.38	0.71
Ni-Ni3M-Ir	-1.536491	0.874267784	-1.377459136	1.344189246	0.321236366	5.26298194	1.937190357	7.64	1.16	1.91	5.77	-1.29	1.38	0.71
Ni-Ni3M-Pt	-1.538186	0.8692312209999999	-1.321235364	1.303880443	0.292030762	5.486551567999999	1.9441220019999998	7.64	1.16	1.91	5.77	-1.29	1.38	0.71
Ni-Ni3M-Au	-1.544611	0.864295025	-1.213907991	1.258763413	0.203081755	6.10344864	1.965230077	7.64	1.16	1.91	5.77	-1.29	1.38	0.71
Ni-Ni3M-Tl	-1.5039959999999999	0.8751102390000001	-1.180700683	1.229969322	-0.06931224	10.68754885	1.878804242	7.64	1.16	1.91	5.77	-1.29	1.38	0.71
Ni-Ni3M-Pb	-1.5440530000000001	0.876883876	-1.161431899	1.194543917	0.3199511	8.043172284	1.948343929	7.64	1.16	1.91	5.77	-1.29	1.38	0.71
Pd-Pd3M-Sc	-0.927141	0.921800208	-1.7387079580000002	1.412439405	0.795367678	4.810576035	2.096690385	8.34	0.56	2.2	5.9	-1.83	1.52	0.94
Pd-Pd3M-Ti	-0.9485530000000001	0.921729872	-2.0747461609999998	1.523255011	0.650761595	4.06532287	2.1229144090000003	8.34	0.56	2.2	5.9	-1.83	1.52	0.94
Pd-Pd3M-V	-0.9670989999999999	0.9221150220000001	-2.102343805	1.541832237	0.597452309	3.995159035	2.13500636	8.34	0.56	2.2	5.9	-1.83	1.52	0.94
Pd-Pd3M-Cr	-1.017323	0.9180896479999999	-1.85938333	1.4792463319999998	0.542224032	4.097005558999999	2.13890365	8.34	0.56	2.2	5.9	-1.83	1.52	0.94
Pd-Pd3M-Co	-0.9802270000000001	0.915753295	-1.969499675	1.556326378	0.431910653	3.7963181410000004	2.165689534	8.34	0.56	2.2	5.9	-1.83	1.52	0.94
Pd-Pd3M-Ni	-1.041825	0.913592672	-1.869474116	1.52282385	0.423726455	3.8353206319999997	2.169120853	8.34	0.56	2.2	5.9	-1.83	1.52	0.94
Pd-Pd3M-Cu	-1.0424129999999998	0.917925604	-1.813970861	1.492623433	0.423477345	3.901440777	2.167982503	8.34	0.56	2.2	5.9	-1.83	1.52	0.94
Pd-Pd3M-Zn	-0.9511959999999999	0.920784797	-1.8223489959999999	1.463595165	0.344058652	4.251223073999999	2.137611647	8.34	0.56	2.2	5.9	-1.83	1.52	0.94
Pd-Pd3M-Ga	-1.014105	0.9234091879999999	-1.881319688	1.494450677	0.311280613	5.127054103	2.157487411	8.34	0.56	2.2	5.9	-1.83	1.52	0.94
Pd-Pd3M-Zr	-0.9356190000000001	0.923457282	-1.9004918240000002	1.4692229119999998	0.857262181	4.7865309069999995	2.09201877	8.34	0.56	2.2	5.9	-1.83	1.52	0.94
Pd-Pd3M-Nb	-0.8048770000000001	0.9193789379999999	-2.17030264	1.5531615419999998	0.7115625870000001	4.165547139	2.131043972	8.34	0.56	2.2	5.9	-1.83	1.52	0.94
Pd-Pd3M-Mo	-0.932529	0.916957404	-2.112487144	1.532801527	0.5847589470000001	3.972726816	2.195966891	8.34	0.56	2.2	5.9	-1.83	1.52	0.94
Pd-Pd3M-Rh	-1.172087	0.917119256	-1.810204556	1.4647812930000002	0.417200135	3.936253185	2.207872028	8.34	0.56	2.2	5.9	-1.83	1.52	0.94
Pd-Pd3M-Ag	-1.1733930000000001	0.9186025440000001	-1.596535332	1.373857174	0.37937525200000005	4.354588487	2.171381551	8.34	0.56	2.2	5.9	-1.83	1.52	0.94
Pd-Pd3M-In	-1.0526	0.9261678790000001	-1.692102099	1.386944285	-0.0017454389999999999	8.703711563999999	2.15388451	8.34	0.56	2.2	5.9	-1.83	1.52	0.94
Pd-Pd3M-Sn	-1.1378549999999998	0.9277480770000001	-1.7421400409999999	1.399713885	0.290257992	5.625174834	2.174733377	8.34	0.56	2.2	5.9	-1.83	1.52	0.94
Pd-Pd3M-La	-1.0171569999999999	0.9245264809999999	-1.4354897919999998	1.256265953	1.038552848	6.176436487	2.052672581	8.34	0.56	2.2	5.9	-1.83	1.52	0.94
Pd-Pd3M-Ta	-0.762767	0.9194391740000001	-2.210003881	1.606736727	0.7449401920000001	4.270341351	2.117334815	8.34	0.56	2.2	5.9	-1.83	1.52	0.94
Pd-Pd3M-W	-0.806841	0.916850924	-2.298699927	1.616421561	0.602072107	3.974940008	2.215499279	8.34	0.56	2.2	5.9	-1.83	1.52	0.94
Pd-Pd3M-Re	-0.9430850000000001	0.916954458	-2.2071608680000003	1.602875619	0.47709359799999995	3.78500093	2.167982503	8.34	0.56	2.2	5.9	-1.83	1.52	0.94
Pd-Pd3M-Os	-1.067373	0.916642368	-2.063650729	1.571700765	0.40367195100000003	3.7509087639999996	2.2	8.34	0.56	2.2	5.9	-1.83	1.52	0.94
Pd-Pd3M-Ir	-1.174309	0.9159029590000001	-1.8772715830000002	1.504886575	0.364128064	3.873838157	2.2	8.34	0.56	2.2	5.9	-1.83	1.52	0.94
Pd-Pd3M-Au	-1.243098	0.919784395	-1.60729436	1.3902378919999998	0.312857247	4.326565512	2.2318437380000002	8.34	0.56	2.2	5.9	-1.83	1.52	0.94
Pd-Pd3M-Tl	-1.115094	0.927853771	-1.615952917	1.356247784	-0.063276573	8.281185729	2.13369291	8.34	0.56	2.2	5.9	-1.83	1.52	0.94
Pd-Pd3M-Pb	-1.189941	0.9279467309999999	-1.594482865	1.322475171	0.202564925	6.7040065339999995	2.212666725	8.34	0.56	2.2	5.9	-1.83	1.52	0.94
Pd-Pd3M-Bi	-1.095469	0.928151562	-1.6583001990000001	1.3632668330000002	-0.240445186	9.397069345	2.181300755	8.34	0.56	2.2	5.9	-1.83	1.52	0.94
Pt-Pt3M-Ti	-1.090766	0.882534557	-2.410907259	1.977216993	0.44148940600000003	3.31368169	2.192266939	9.0	2.13	2.28	6.74	-2.25	1.53	1.04
Pt-Pt3M-V	-1.09836	0.87720717	-2.451571242	2.010614073	0.38598347200000005	3.219856236	2.204753916	9.0	2.13	2.28	6.74	-2.25	1.53	1.04
Pt-Pt3M-Cr	-1.1206200000000002	0.8773690559999999	-2.316274373	1.9828982309999998	0.33104216	3.24720347	2.208778525	9.0	2.13	2.28	6.74	-2.25	1.53	1.04
Pt-Pt3M-Co	-1.06964	0.875142023	-2.389711519	2.048370994	0.273428235	3.1084936689999996	2.236439464	9.0	2.13	2.28	6.74	-2.25	1.53	1.04
Pt-Pt3M-Cu	-1.064746	0.873912841	-2.228663062	1.9818961880000001	0.253254559	3.164150297	2.238807342	9.0	2.13	2.28	6.74	-2.25	1.53	1.04
Pt-Pt3M-Zn	-1.081885	0.88092144	-2.272448788	1.945845558	0.252824434	3.363093884	2.207444314	9.0	2.13	2.28	6.74	-2.25	1.53	1.04
Pt-Pt3M-Ga	-1.226707	0.880339743	-2.275099695	1.957417032	0.245491104	3.559442818	2.22796939	9.0	2.13	2.28	6.74	-2.25	1.53	1.04
Pt-Pt3M-Nb	-1.005465	0.878712888	-2.363604783	1.962256565	0.488502933	3.3717720730000003	2.200662082	9.0	2.13	2.28	6.74	-2.25	1.53	1.04
Pt-Pt3M-Mo	-1.1051540000000002	0.875471363	-2.3967796530000003	1.971528111	0.39958236	3.239330137	2.2677059390000003	9.0	2.13	2.28	6.74	-2.25	1.53	1.04
Pt-Pt3M-Ru	-1.268407	0.875239092	-2.2636323380000003	1.9587002669999998	0.26934606899999997	3.207338855	2.271870804	9.0	2.13	2.28	6.74	-2.25	1.53	1.04
Pt-Pt3M-Rh	-1.297008	0.8740055109999999	-2.201361609	1.943600922	0.251663812	3.2274959460000003	2.28	9.0	2.13	2.28	6.74	-2.25	1.53	1.04
Pt-Pt3M-Pd	-1.318758	0.876004455	-2.10775449	1.8982386619999998	0.238194047	3.252885205	2.271870804	9.0	2.13	2.28	6.74	-2.25	1.53	1.04
Pt-Pt3M-Ag	-1.2407629999999998	0.8779245390000001	-2.013856435	1.834398466	0.226555062	3.379610511	2.2423174319999997	9.0	2.13	2.28	6.74	-2.25	1.53	1.04
Pt-Pt3M-In	-1.305142	0.8845245159999999	-2.098891052	1.8375026540000001	0.094399065	5.071776792	2.224248788	9.0	2.13	2.28	6.74	-2.25	1.53	1.04
Pt-Pt3M-Sn	-1.359119	0.885095958	-2.0352030919999997	1.809877481	0.23860744399999997	3.975469632	2.245778757	9.0	2.13	2.28	6.74	-2.25	1.53	1.04
Pt-Pt3M-La	-1.310365	0.886890416	-1.751527845	1.621412965	0.586282464	4.323174964	2.119730412	9.0	2.13	2.28	6.74	-2.25	1.53	1.04
Pt-Pt3M-Ta	-0.97444	0.8794997720000001	-2.378650115	2.009628446	0.520332864	3.421117135	2.1865050669999997	9.0	2.13	2.28	6.74	-2.25	1.53	1.04
Pt-Pt3M-W	-0.983585	0.875451247	-2.521651223	2.042177101	0.41835592	3.2199751269999997	2.287876422	9.0	2.13	2.28	6.74	-2.25	1.53	1.04
Pt-Pt3M-Re	-1.127846	0.87609361	-2.516846987	2.055766031	0.33594852299999994	3.1243532189999996	2.238807342	9.0	2.13	2.28	6.74	-2.25	1.53	1.04
Pt-Pt3M-Os	-1.239416	0.8767472	-2.3868879919999997	2.016146015	0.26752605	3.142616033	2.271870804	9.0	2.13	2.28	6.74	-2.25	1.53	1.04
Pt-Pt3M-Ir	-1.3114649999999999	0.8758814559999999	-2.2440358380000003	1.961940667	0.225699603	3.19048307	2.271870804	9.0	2.13	2.28	6.74	-2.25	1.53	1.04
Pt-Pt3M-Au	-1.364028	0.880550698	-2.002081783	1.836494377	0.193367772	3.37774555	2.304754831	9.0	2.13	2.28	6.74	-2.25	1.53	1.04
Pt-Pt3M-Tl	-1.389269	0.883495912	-1.9877678490000001	1.790048708	0.043342020999999994	4.962589471	2.2033975580000003	9.0	2.13	2.28	6.74	-2.25	1.53	1.04
Pt-Pt3M-Bi	-1.36894	0.889807692	-1.9383116280000001	1.7597606280000002	0.06797768	5.592415217	2.252560682	9.0	2.13	2.28	6.74	-2.25	1.53	1.04
Rh-Rh3M-Sc	-1.439178	0.797408663	-1.444311759	1.775491369	0.49711850399999996	3.522065767	2.165186214	7.46	1.14	2.28	5.91	-1.73	1.49	0.99
Rh-Rh3M-Ti	-1.316745	0.801863048	-1.697319482	1.896515271	0.423261165	3.1209263010000003	2.192266939	7.46	1.14	2.28	5.91	-1.73	1.49	0.99
Rh-Rh3M-V	-1.3436860000000002	0.7908725999999999	-1.797375255	1.965435316	0.378668127	2.960296698	2.204753916	7.46	1.14	2.28	5.91	-1.73	1.49	0.99
Rh-Rh3M-Cr	-1.410179	0.7916423429999999	-1.7770637269999998	1.970591913	0.330525412	2.959760357	2.208778525	7.46	1.14	2.28	5.91	-1.73	1.49	0.99
Rh-Rh3M-Mn	-0.8644430000000001	0.7923520740000001	-1.7234116080000002	1.9589856959999998	0.297210537	2.99801583	2.193686346	7.46	1.14	2.28	5.91	-1.73	1.49	0.99
Rh-Rh3M-Co	-1.559317	0.795126676	-1.709092091	1.934352165	0.289042777	3.008974026	2.236439464	7.46	1.14	2.28	5.91	-1.73	1.49	0.99
Rh-Rh3M-Ni	-1.603889	0.7962473170000001	-1.710316081	1.9242418609999998	0.280211424	3.034499887	2.23998288	7.46	1.14	2.28	5.91	-1.73	1.49	0.99
Rh-Rh3M-Cu	-1.6647779999999999	0.79667497	-1.617440194	1.878171834	0.261615595	3.104961815	2.238807342	7.46	1.14	2.28	5.91	-1.73	1.49	0.99
Rh-Rh3M-Zn	-1.5731680000000001	0.802579574	-1.5762089259999998	1.8538562840000001	0.23482920899999998	3.3048546589999996	2.207444314	7.46	1.14	2.28	5.91	-1.73	1.49	0.99
Rh-Rh3M-Ga	-1.502043	0.7973743670000001	-1.5869457969999998	1.87440014	0.191948797	3.703540897	2.22796939	7.46	1.14	2.28	5.91	-1.73	1.49	0.99
Rh-Rh3M-Y	-1.585494	0.79392371	-1.311930244	1.643021801	0.566427219	3.971072828	2.141792263	7.46	1.14	2.28	5.91	-1.73	1.49	0.99
Rh-Rh3M-Zr	-1.420312	0.798325915	-1.48877344	1.781909433	0.529615731	3.520880485	2.160361984	7.46	1.14	2.28	5.91	-1.73	1.49	0.99
Rh-Rh3M-Nb	-1.396266	0.792153219	-1.6481303459999999	1.8821381069999998	0.43837703899999997	3.1395511369999998	2.200662082	7.46	1.14	2.28	5.91	-1.73	1.49	0.99
Rh-Rh3M-Mo	-1.4354040000000001	0.789647793	-1.737334036	1.924897794	0.369814753	3.008452082	2.2677059390000003	7.46	1.14	2.28	5.91	-1.73	1.49	0.99
Rh-Rh3M-Ru	-1.632282	0.793162108	-1.7405456240000001	1.8985010830000002	0.293702507	3.064880528	2.271870804	7.46	1.14	2.28	5.91	-1.73	1.49	0.99
Rh-Rh3M-Pd	-1.782441	0.795415181	-1.5992849580000001	1.811227058	0.24296309600000002	3.222875684	2.271870804	7.46	1.14	2.28	5.91	-1.73	1.49	0.99
Rh-Rh3M-Ag	-1.8013830000000002	0.798183102	-1.4816972640000001	1.746974826	0.24342736899999998	3.44722036	2.2423174319999997	7.46	1.14	2.28	5.91	-1.73	1.49	0.99
Rh-Rh3M-In	-1.628112	0.797387453	-1.438600485	1.7438232880000002	0.031009497999999996	5.342603313	2.224248788	7.46	1.14	2.28	5.91	-1.73	1.49	0.99
Rh-Rh3M-Ta	-1.392981	0.7938670809999999	-1.6483375569999998	1.9091050930000002	0.45086173700000004	3.191725768	2.1865050669999997	7.46	1.14	2.28	5.91	-1.73	1.49	0.99
Rh-Rh3M-W	-1.428275	0.791901228	-1.7674432830000002	1.9706425369999998	0.375418424	3.014280743	2.287876422	7.46	1.14	2.28	5.91	-1.73	1.49	0.99
Rh-Rh3M-Re	-1.462603	0.791230192	-1.8383168680000002	2.001493549	0.303931601	2.941745811	2.238807342	7.46	1.14	2.28	5.91	-1.73	1.49	0.99
Rh-Rh3M-Ir	-1.692975	0.790134578	-1.723623144	1.909215254	0.22039072899999998	3.107620165	2.271870804	7.46	1.14	2.28	5.91	-1.73	1.49	0.99
Rh-Rh3M-Pt	-1.787216	0.789017139	-1.6105778640000001	1.8390689919999998	0.186923891	3.257606664	2.28	7.46	1.14	2.28	5.91	-1.73	1.49	0.99
Rh-Rh3M-Au	-1.826603	0.7924645490000001	-1.5033250040000001	1.768913133	0.17285277100000002	3.4872296080000003	2.304754831	7.46	1.14	2.28	5.91	-1.73	1.49	0.99
Rh-Rh3M-Tl	-1.7138900000000001	0.797942447	-1.4116482080000001	1.725156177	-0.011647188000000001	5.213106498	2.2033975580000003	7.46	1.14	2.28	5.91	-1.73	1.49	0.99
Ir-Ir3M-Sc	-1.604455	0.7744779070000001	-1.788384099	2.250539283	0.227144929	2.84357762	2.096690385	9.1	1.57	2.2	6.63	-2.11	1.5	1.08
Ir-Ir3M-Ti	-1.497441	0.773457438	-1.98110789	2.377973715	0.210311229	2.630024935	2.1229144090000003	9.1	1.57	2.2	6.63	-2.11	1.5	1.08
Ir-Ir3M-Ni	-1.7395580000000002	0.772118463	-2.066493803	2.428908055	0.100401006	2.606411939	2.169120853	9.1	1.57	2.2	6.63	-2.11	1.5	1.08
Ir-Ir3M-Cu	-1.807207	0.7749495759999999	-1.9712480369999998	2.3751962069999997	0.08348884	2.6466126	2.167982503	9.1	1.57	2.2	6.63	-2.11	1.5	1.08
Ir-Ir3M-Zn	-1.664249	0.776392119	-1.901301405	2.341214122	0.070313655	2.7481933730000003	2.137611647	9.1	1.57	2.2	6.63	-2.11	1.5	1.08
Ir-Ir3M-Ga	-1.667603	0.7784716629999999	-1.96965708	2.368837364	0.051226275999999994	2.897540415	2.157487411	9.1	1.57	2.2	6.63	-2.11	1.5	1.08
Ir-Ir3M-Y	-1.7611279999999998	0.7736519390000001	-1.654236565	2.093741569	0.23240223399999999	3.065206965	2.074036504	9.1	1.57	2.2	6.63	-2.11	1.5	1.08
Ir-Ir3M-Zr	-1.617979	0.7715074829999999	-1.7899473559999999	2.2347613369999997	0.24606679899999997	2.835988883	2.09201877	9.1	1.57	2.2	6.63	-2.11	1.5	1.08
Ir-Ir3M-Nb	-1.531068	0.772533932	-1.990622296	2.350227477	0.23579797600000002	2.662710356	2.131043972	9.1	1.57	2.2	6.63	-2.11	1.5	1.08
Ir-Ir3M-Mo	-1.5487739999999999	0.768854755	-2.092099514	2.401684601	0.2103953	2.582228814	2.195966891	9.1	1.57	2.2	6.63	-2.11	1.5	1.08
Ir-Ir3M-Ru	-1.7093509999999998	0.768432989	-2.078216269	2.3901574269999997	0.121123276	2.593033965	2.2	9.1	1.57	2.2	6.63	-2.11	1.5	1.08
Ir-Ir3M-Rh	-1.7499330000000002	0.768666665	-2.061055173	2.369302853	0.09426122099999999	2.63315668	2.207872028	9.1	1.57	2.2	6.63	-2.11	1.5	1.08
Ir-Ir3M-Pd	-1.9223080000000001	0.771118675	-1.968638396	2.310743539	0.064164237	2.6967606710000003	2.2	9.1	1.57	2.2	6.63	-2.11	1.5	1.08
Ir-Ir3M-Ag	-1.984633	0.773854589	-1.8255730940000001	2.232103247	0.051020797	2.812443721	2.171381551	9.1	1.57	2.2	6.63	-2.11	1.5	1.08
Ir-Ir3M-La	-1.8362009999999998	0.7725246179999999	-1.616280221	2.049907225	0.20418507	3.18698838	2.052672581	9.1	1.57	2.2	6.63	-2.11	1.5	1.08
Ir-Ir3M-Ta	-1.526075	0.771110588	-1.977880808	2.376494348	0.246492805	2.682634115	2.117334815	9.1	1.57	2.2	6.63	-2.11	1.5	1.08
Ir-Ir3M-W	-1.5319260000000001	0.77006545	-2.1096649569999997	2.4392977940000002	0.225146307	2.58823213	2.215499279	9.1	1.57	2.2	6.63	-2.11	1.5	1.08
Ir-Ir3M-Re	-1.548908	0.7698383000000001	-2.1827666690000003	2.478634654	0.181201748	2.5350921459999998	2.167982503	9.1	1.57	2.2	6.63	-2.11	1.5	1.08
Ir-Ir3M-Os	-1.6538380000000001	0.767817557	-2.157291723	2.452725128	0.12588843	2.553765448	2.2	9.1	1.57	2.2	6.63	-2.11	1.5	1.08
Ir-Ir3M-Pt	-1.928711	0.7697200059999999	-2.00665589	2.33527493	0.042004415999999996	2.709558518	2.207872028	9.1	1.57	2.2	6.63	-2.11	1.5	1.08
Ir-Ir3M-Au	-2.0169099999999998	0.76972752	-1.859326157	2.256134187	0.016161653	2.828428567	2.2318437380000002	9.1	1.57	2.2	6.63	-2.11	1.5	1.08
Ir-Ir3M-Tl	-1.881532	0.7738676729999999	-1.7491415330000002	2.183631239	-0.115723572	3.690992229	2.13369291	9.1	1.57	2.2	6.63	-2.11	1.5	1.08
Ir-Ir3M-Bi	-2.005887	0.777799968	-1.7681704130000002	2.1516863390000003	-0.097847539	3.66892282	2.181300755	9.1	1.57	2.2	6.63	-2.11	1.5	1.08
Re-Re3M-Ti	-1.7483060000000001	0.599286659	-0.652853025	2.6829086859999998	0.076173764	2.18206563	1.860502736	7.88	0.15	1.9	5.88	-0.51	1.52	1.2
Re-Re3M-V	-1.5395889999999999	0.590159178	-0.726197676	2.7654115710000005	0.048264275	2.127330998	1.871100011	7.88	0.15	1.9	5.88	-0.51	1.52	1.2
Re-Re3M-Cr	-1.487722	0.5904088829999999	-0.778640193	2.8344418489999996	0.037146135	2.090736592	1.87451556	7.88	0.15	1.9	5.88	-0.51	1.52	1.2
Re-Re3M-Mn	-1.315626	0.589862369	-0.8629850379999999	2.888995608	0.033862859	2.075520417	1.861707339	7.88	0.15	1.9	5.88	-0.51	1.52	1.2
Re-Re3M-Co	-1.414367	0.592264965	-0.990455498	2.934668595	0.031140507	2.068337346	1.8979904630000002	7.88	0.15	1.9	5.88	-0.51	1.52	1.2
Re-Re3M-Ni	-1.467234	0.589821785	-1.031899352	2.92507601	0.021840362000000002	2.087403738	1.900997639	7.88	0.15	1.9	5.88	-0.51	1.52	1.2
Re-Re3M-Cu	-1.552363	0.589950133	-0.968255775	2.8522355	-0.001470474	2.147973764	1.9	7.88	0.15	1.9	5.88	-0.51	1.52	1.2
Re-Re3M-Zr	-1.9459119999999999	0.59279059	-0.518056262	2.566557655	0.079031412	2.263882866	1.833426081	7.88	0.15	1.9	5.88	-0.51	1.52	1.2
Re-Re3M-Nb	-1.7149020000000001	0.589238334	-0.579950495	2.659981362	0.063782369	2.199573269	1.86762741	7.88	0.15	1.9	5.88	-0.51	1.52	1.2
Re-Re3M-Mo	-1.618276	0.589997788	-0.645487382	2.736441254	0.031527589	2.141135573	1.9245252609999999	7.88	0.15	1.9	5.88	-0.51	1.52	1.2
Re-Re3M-Ru	-1.517871	0.592100023	-0.8049149109999999	2.8355862519999997	-0.003191849	2.086292495	1.9280598409999998	7.88	0.15	1.9	5.88	-0.51	1.52	1.2
Re-Re3M-Rh	-1.5531469999999998	0.5875143	-0.888945071	2.8500677339999996	-0.016494506000000003	2.107420437	1.934958815	7.88	0.15	1.9	5.88	-0.51	1.52	1.2
Re-Re3M-Pd	-1.612462	0.588224911	-0.9041676009999999	2.811186699	-0.033776554	2.160334998	1.9280598409999998	7.88	0.15	1.9	5.88	-0.51	1.52	1.2
Re-Re3M-Ag	-1.651544	0.590457419	-0.867558763	2.750431561	-0.059284218	2.245182195	1.902978895	7.88	0.15	1.9	5.88	-0.51	1.52	1.2
Re-Re3M-Ta	-1.7131720000000001	0.590552896	-0.595860176	2.671356136	0.069801078	2.218826809	1.855612831	7.88	0.15	1.9	5.88	-0.51	1.52	1.2
Re-Re3M-W	-1.602105	0.591174851	-0.660778356	2.75098755	0.038779174	2.162702798	1.941643267	7.88	0.15	1.9	5.88	-0.51	1.52	1.2
Re-Re3M-Os	-1.492383	0.5944270970000001	-0.808904203	2.8808202560000002	-0.015069843000000001	2.097400325	1.9280598409999998	7.88	0.15	1.9	5.88	-0.51	1.52	1.2
Re-Re3M-Ir	-1.562202	0.59067465	-0.902995392	2.8801463889999996	-0.041143723	2.1294313	1.9280598409999998	7.88	0.15	1.9	5.88	-0.51	1.52	1.2
Re-Re3M-Pt	-1.6438650000000001	0.589098534	-0.927745442	2.84385632	-0.070425541	2.1939848790000003	1.934958815	7.88	0.15	1.9	5.88	-0.51	1.52	1.2
Ag3M-Ti	0.11048800000000002	0.976190931	-4.192619697	1.139020729	2.9531259519999997	17.33883384	1.8036253580000001	7.58	1.3	1.93	5.01	-4.3	1.59	0.89
Ag3M-V	0.041306	0.975106777	-4.087394154	1.176813933	2.8850435180000003	16.85855644	1.834621157	7.58	1.3	1.93	5.01	-4.3	1.59	0.89
Ag3M-Cr	0.032003	0.9769109840000001	-4.056865988999999	1.169044742	2.88233232	17.32814422	1.844686386	7.58	1.3	1.93	5.01	-4.3	1.59	0.89
Ag3M-Mn	0.034649	0.974771485	-4.191223145	1.185540364	2.760732586	17.07947822	1.8071309580000001	7.58	1.3	1.93	5.01	-4.3	1.59	0.89
Ag3M-Co	0.037391	0.9763951940000001	-3.953812997	1.198754029	2.316171367	14.00352453	1.9148619569999998	7.58	1.3	1.93	5.01	-4.3	1.59	0.89
Ag3M-Ni	0.030238	0.9765696709999999	-3.851421132	1.194402441	2.218871624	13.38859734	1.92397811	7.58	1.3	1.93	5.01	-4.3	1.59	0.89
Ag3M-Cu	0.038045999999999996	0.9781912759999999	-4.041640129	1.190760201	2.411236633	15.23057866	1.9209506	7.58	1.3	1.93	5.01	-4.3	1.59	0.89
Ag3M-Zn	0.021338	0.980568098	-4.087601328	1.15429343	2.28750546	16.45291616	1.8413455630000002	7.58	1.3	1.93	5.01	-4.3	1.59	0.89
Ag3M-Ga	0.062303	0.9777069979999999	-4.180994049	1.198260635	2.370851312	17.29087082	1.893187763	7.58	1.3	1.93	5.01	-4.3	1.59	0.89
Ag3M-Mo	0.0623	0.9745120859999999	-3.992146547	1.174925464	2.748217917	15.27144267	1.9963019990000002	7.58	1.3	1.93	5.01	-4.3	1.59	0.89
Ag3M-Ru	0.038113	0.9754332859999999	-3.785183567	1.215207516	2.1346816140000002	11.47573049	2.007321427	7.58	1.3	1.93	5.01	-4.3	1.59	0.89
Ag3M-Rh	0.033463	0.976454168	-3.579886368	1.176753248	2.12986781	11.84187525	2.028946383	7.58	1.3	1.93	5.01	-4.3	1.59	0.89
Ag3M-Pd	-0.020645	0.979121108	-3.650650775	1.145433626	2.068760738	12.16339641	2.007321427	7.58	1.3	1.93	5.01	-4.3	1.59	0.89
Ag3M-Os	0.051171	0.9731737840000001	-3.7724380330000002	1.273340642	2.038693744	10.70430341	2.007321427	7.58	1.3	1.93	5.01	-4.3	1.59	0.89
Ag3M-Ir	0.049074	0.974815378	-3.6021863489999997	1.236220783	1.997232025	10.83047717	2.007321427	7.58	1.3	1.93	5.01	-4.3	1.59	0.89
Ag3M-Pt	-0.009738	0.977477012	-3.595281223	1.2027981220000001	1.946874714	11.11377165	2.028946383	7.58	1.3	1.93	5.01	-4.3	1.59	0.89
Ag3M-Au	0.051615999999999995	0.979697547	-3.9360342289999997	1.1818778509999999	2.108508028	13.91907942	2.09575365	7.58	1.3	1.93	5.01	-4.3	1.59	0.89
Cu3M-Sc	-0.314238	0.9685147059999999	-2.6993530139999997	0.9735136759999999	2.2764660219999997	13.60011387	1.7186569280000001	7.73	1.24	1.9	5.3	-2.67	1.41	0.67
Cu3M-Ti	-0.321807	0.9668970440000001	-2.73460453	1.016287226	1.946440815	11.51453629	1.78395435	7.73	1.24	1.9	5.3	-2.67	1.41	0.67
Cu3M-V	-0.430662	0.9668159740000001	-2.5676089490000003	1.040863615	1.8335607980000002	11.21080234	1.8146120980000002	7.73	1.24	1.9	5.3	-2.67	1.41	0.67
Cu3M-Cr	-0.503096	0.969438056	-2.457898353	1.035165708	1.765716598	11.44351906	1.824567552	7.73	1.24	1.9	5.3	-2.67	1.41	0.67
Cu3M-Mn	-0.403082	0.968147007	-2.637442503	1.045754358	1.54703767	11.13889311	1.7874217159999999	7.73	1.24	1.9	5.3	-2.67	1.41	0.67
Cu3M-Co	-0.424858	0.96703463	-2.342940454	1.073448772	1.134487878	8.662417656	1.8939777619999998	7.73	1.24	1.9	5.3	-2.67	1.41	0.67
Cu3M-Ni	-0.46927399999999997	0.969408334	-2.249744619	1.0768949859999999	1.084683326	8.458051009	1.90299449	7.73	1.24	1.9	5.3	-2.67	1.41	0.67
Cu3M-Zn	-0.497225	0.972884583	-2.45399814	1.047151972	0.9463363290000001	13.10423629	1.821263164	7.73	1.24	1.9	5.3	-2.67	1.41	0.67
Cu3M-Ga	-0.338161	0.9714128129999999	-2.6324165059999998	1.0999410729999999	0.95303099	16.17304216	1.872539955	7.73	1.24	1.9	5.3	-2.67	1.41	0.67
Cu3M-Y	-0.329171	0.969118933	-2.6077003519999997	0.982011174	2.513287072	15.44325308	1.663548511	7.73	1.24	1.9	5.3	-2.67	1.41	0.67
Cu3M-Zr	-0.282916	0.965360577	-2.707855657	1.0348092759999998	2.186968223	12.50125959	1.707194539	7.73	1.24	1.9	5.3	-2.67	1.41	0.67
Cu3M-Nb	-0.281993	0.9632170659999999	-2.672307978	1.0748806659999999	1.890621679	10.57910606	1.8045275440000001	7.73	1.24	1.9	5.3	-2.67	1.41	0.67
Cu3M-Mo	-0.355598	0.964720325	-2.509917307	1.087894231	1.5722935409999999	9.370842742	1.9745295880000002	7.73	1.24	1.9	5.3	-2.67	1.41	0.67
Cu3M-Ru	-0.42386	0.966036736	-2.187576833	1.081788274	1.094976909	7.934699597000001	1.985428835	7.73	1.24	1.9	5.3	-2.67	1.41	0.67
Cu3M-Rh	-0.46754799999999996	0.968265612	-2.062526208	1.067819938	0.960266524	7.817896975	2.00681794	7.73	1.24	1.9	5.3	-2.67	1.41	0.67
Cu3M-Pd	-0.52883	0.9720936	-2.036648195	1.035885467	0.7283695609999999	8.018528399	1.985428835	7.73	1.24	1.9	5.3	-2.67	1.41	0.67
Cu3M-Ag	-0.474699	0.9747054829999999	-2.278147146	1.01322792	0.6827077109999999	11.29981232	1.9089507030000001	7.73	1.24	1.9	5.3	-2.67	1.41	0.67
Cu3M-Sn	-0.327256	0.973473701	-2.5035885490000003	1.031923267	1.1779549809999998	14.83158273	1.917804539	7.73	1.24	1.9	5.3	-2.67	1.41	0.67
Cu3M-Ta	-0.743625	0.962242169	-2.81540722	1.134027542	1.8949103980000002	10.61970382	1.7699251409999999	7.73	1.24	1.9	5.3	-2.67	1.41	0.67
Cu3M-Re	-0.869258	0.963411441	-2.535541661	1.164331487	1.237436114	8.084270856	1.9	7.73	1.24	1.9	5.3	-2.67	1.41	0.67
Cu3M-Os	-0.401569	0.964447466	-2.323712825	1.145859647	0.9878838240000001	7.611451303	1.985428835	7.73	1.24	1.9	5.3	-2.67	1.41	0.67
Cu3M-Ir	-0.405696	0.967020309	-2.16425209	1.12168783	0.7856999020000001	7.460248966	1.985428835	7.73	1.24	1.9	5.3	-2.67	1.41	0.67
Cu3M-Pt	-0.49181199999999997	0.970423898	-2.033106955	1.091391048	0.541772934	7.562870767000001	2.00681794	7.73	1.24	1.9	5.3	-2.67	1.41	0.67
Cu3M-Au	-0.403053	0.974167082	-2.278895641	1.072046545	0.40226950100000003	10.09368648	2.072896583	7.73	1.24	1.9	5.3	-2.67	1.41	0.67
Pt3M-Ti	-1.123417	0.885277271	-2.487618962	1.954990298	0.608649295	3.543969914	2.026798663	9.0	2.13	2.28	6.74	-2.25	1.53	1.04
Pt3M-V	-1.211983	0.874905536	-2.495168774	1.990865567	0.557992122	3.4415663289999996	2.061629758	9.0	2.13	2.28	6.74	-2.25	1.53	1.04
Pt3M-Cr	-1.432006	0.879274362	-2.298514089	1.946243205	0.519234686	3.515815092	2.072940417	9.0	2.13	2.28	6.74	-2.25	1.53	1.04
Pt3M-Mn	-1.39903	0.879657137	-2.1658111069999997	1.90755816	0.471018244	3.569681367	2.030738032	9.0	2.13	2.28	6.74	-2.25	1.53	1.04
Pt3M-Co	-1.265976	0.8792221029999999	-2.361596993	1.9605224669999999	0.35267	3.3420252660000003	2.15179923	9.0	2.13	2.28	6.74	-2.25	1.53	1.04
Pt3M-Cu	-1.254098	0.884750123	-2.1589434119999997	1.885201348	0.32435690899999997	3.4160892539999996	2.1586412569999998	9.0	2.13	2.28	6.74	-2.25	1.53	1.04
Pt3M-Zn	-1.386555	0.895210095	-2.220138048	1.874530181	0.23931962699999998	3.8570153489999996	2.069186214	9.0	2.13	2.28	6.74	-2.25	1.53	1.04
Pt3M-Ga	-1.5410840000000001	0.887676053	-2.245003131	1.950357519	0.18765090199999998	4.355642349	2.1274431590000003	9.0	2.13	2.28	6.74	-2.25	1.53	1.04
Pt3M-Nb	-0.628204	0.874011124	-2.7041631410000004	2.031881304	0.666325291	3.550105051	2.050172424	9.0	2.13	2.28	6.74	-2.25	1.53	1.04
Pt3M-Mo	-1.029882	0.871898231	-2.5922793459999998	2.015699859	0.560378525	3.366281205	2.243316333	9.0	2.13	2.28	6.74	-2.25	1.53	1.04
Pt3M-Ru	-1.33792	0.8704838220000001	-2.291007617	1.940412246	0.359894993	3.2425587360000003	2.25569926	9.0	2.13	2.28	6.74	-2.25	1.53	1.04
Pt3M-Rh	-1.392924	0.870735597	-2.173938585	1.901402169	0.327264854	3.3087186089999996	2.28	9.0	2.13	2.28	6.74	-2.25	1.53	1.04
Pt3M-Pd	-1.427178	0.876883732	-2.050425684	1.8439846000000002	0.277339748	3.3197833269999997	2.25569926	9.0	2.13	2.28	6.74	-2.25	1.53	1.04
Pt3M-Ag	-1.3011469999999998	0.8876622040000001	-1.985543514	1.791250704	0.21793634899999997	3.591287408	2.1688103919999997	9.0	2.13	2.28	6.74	-2.25	1.53	1.04
Pt3M-In	-1.363983	0.89355606	-2.106627939	1.875541051	-0.08189437	7.018267916	2.116802762	9.0	2.13	2.28	6.74	-2.25	1.53	1.04
Pt3M-Sn	-1.243774	0.89550411	-2.167913475	1.8594982340000001	0.239710282	4.512258388	2.1788694730000002	9.0	2.13	2.28	6.74	-2.25	1.53	1.04
Pt3M-La	-1.469566	0.8932616290000001	-1.850182321	1.683195683	1.1185822029999999	5.1246022589999995	1.83219713	9.0	2.13	2.28	6.74	-2.25	1.53	1.04
Pt3M-Ta	-0.454107	0.8729503609999999	-2.8450717969999997	2.117430003	0.697898611	3.631240955	2.0108597009999998	9.0	2.13	2.28	6.74	-2.25	1.53	1.04
Pt3M-W	-0.713322	0.870238417	-2.8339626030000002	2.114996739	0.584948905	3.400137944	2.303710988	9.0	2.13	2.28	6.74	-2.25	1.53	1.04
Pt3M-Re	-0.9282950000000001	0.871857453	-2.7040685539999996	2.116235004	0.45374477700000004	3.196309648	2.1586412569999998	9.0	2.13	2.28	6.74	-2.25	1.53	1.04
Pt3M-Os	-1.1912909999999999	0.871803495	-2.462326551	2.043921978	0.350000824	3.1766096760000004	2.25569926	9.0	2.13	2.28	6.74	-2.25	1.53	1.04
Pt3M-Ir	-1.293558	0.871840023	-2.256747744	1.9692450559999999	0.265308857	3.210752455	2.25569926	9.0	2.13	2.28	6.74	-2.25	1.53	1.04
Pt3M-Au	-1.31483	0.886954776	-1.9958083269999998	1.83980059	0.138494869	3.446224022	2.355073729	9.0	2.13	2.28	6.74	-2.25	1.53	1.04
Pt3M-Tl	-1.297428	0.8935010859999999	-2.032165163	1.8360094630000001	-0.141770899	6.330152137000001	2.057827171	9.0	2.13	2.28	6.74	-2.25	1.53	1.04
Pt3M-Bi	-1.3276629999999998	0.8994053120000001	-2.214735126	1.8163205000000002	-0.079933773	6.65329654	2.19866875	9.0	2.13	2.28	6.74	-2.25	1.53	1.04
Pd3M-Sc	-1.2039540000000002	0.930893489	-1.969496645	1.464639241	1.181936358	5.496604564	1.904397265	8.34	0.56	2.2	5.9	-1.83	1.52	0.94
Pd3M-Ti	-0.832945	0.925173068	-2.335678942	1.5324721030000001	0.8833167890000001	4.540405117	1.976751572	8.34	0.56	2.2	5.9	-1.83	1.52	0.94
Pd3M-V	-1.015227	0.91890729	-2.2778462719999997	1.5564482080000002	0.852888511	4.490280434	2.010722593	8.34	0.56	2.2	5.9	-1.83	1.52	0.94
Pd3M-Cr	-1.112419	0.921299247	-1.9586816580000002	1.4937945209999999	0.803388367	4.640194135	2.021753963	8.34	0.56	2.2	5.9	-1.83	1.52	0.94
Pd3M-Co	-0.97377	0.917971561	-2.0170241669999998	1.525160343	0.523199445	4.145602795	2.098665539	8.34	0.56	2.2	5.9	-1.83	1.52	0.94
Pd3M-Ni	-1.083923	0.915801469	-1.86182685	1.4815939830000002	0.529253916	4.210177798	2.108656732	8.34	0.56	2.2	5.9	-1.83	1.52	0.94
Pd3M-Cu	-1.034116	0.921558342	-1.783368175	1.459154529	0.49041607200000004	4.2284044419999995	2.105338619	8.34	0.56	2.2	5.9	-1.83	1.52	0.94
Pd3M-Zn	-0.964311	0.9345741470000001	-1.89020676	1.4297510180000002	0.244112335	5.043948366	2.01809246	8.34	0.56	2.2	5.9	-1.83	1.52	0.94
Pd3M-Ga	-1.110582	0.9287230809999999	-1.951275792	1.533595275	0.173612778	6.532407717999999	2.074910885	8.34	0.56	2.2	5.9	-1.83	1.52	0.94
Pd3M-Zr	-0.740105	0.920419923	-2.33997405	1.564046694	1.17446263	5.259581171000001	1.8916961019999998	8.34	0.56	2.2	5.9	-1.83	1.52	0.94
Pd3M-Nb	-0.493587	0.9122443000000001	-2.745843247	1.629319405	0.9859322420000001	4.65902319	1.999548172	8.34	0.56	2.2	5.9	-1.83	1.52	0.94
Pd3M-Mo	-0.7955720000000001	0.912407814	-2.430158309	1.5978955719999999	0.8268475470000001	4.294718152	2.18792284	8.34	0.56	2.2	5.9	-1.83	1.52	0.94
Pd3M-Rh	-1.132914	0.913152958	-1.8840137030000002	1.480331969	0.48128189	3.9794441989999996	2.223700689	8.34	0.56	2.2	5.9	-1.83	1.52	0.94
Pd3M-Ag	-1.099097	0.923247048	-1.584004514	1.3803042509999999	0.271636212	4.672581141	2.115256651	8.34	0.56	2.2	5.9	-1.83	1.52	0.94
Pd3M-In	-1.052872	0.932156471	-1.830239276	1.465423467	-0.459993169	12.36332076	2.0645332290000002	8.34	0.56	2.2	5.9	-1.83	1.52	0.94
Pd3M-Sn	-0.8859100000000001	0.93299052	-1.9881582880000002	1.465027309	0.17340581800000002	6.218965796	2.125067346	8.34	0.56	2.2	5.9	-1.83	1.52	0.94
Pd3M-Ta	-0.353142	0.911300566	-2.9420745310000003	1.7126796819999999	1.016527711	4.815119555	1.961206185	8.34	0.56	2.2	5.9	-1.83	1.52	0.94
Pd3M-W	-0.6013729999999999	0.9093492129999999	-2.746151027	1.7045513419999998	0.8449675090000001	4.344036689	2.24682619	8.34	0.56	2.2	5.9	-1.83	1.52	0.94
Pd3M-Re	-0.741304	0.9119819029999999	-2.530003309	1.679489362	0.643124265	3.964083608	2.105338619	8.34	0.56	2.2	5.9	-1.83	1.52	0.94
Pd3M-Os	-0.8484520000000001	0.91157185	-2.292914853	1.6431309330000001	0.5000182320000001	3.773395942	2.2	8.34	0.56	2.2	5.9	-1.83	1.52	0.94
Pd3M-Ir	-1.010189	0.91099597	-2.007594626	1.569579118	0.388043123	3.8267935360000003	2.2	8.34	0.56	2.2	5.9	-1.83	1.52	0.94
Pd3M-Au	-1.102411	0.9220633	-1.615822789	1.43646114	0.146959906	4.384622643999999	2.296920647	8.34	0.56	2.2	5.9	-1.83	1.52	0.94
Pd3M-Tl	-0.994924	0.9328235640000001	-1.7444946909999999	1.4501849530000002	-0.536605869	10.84218458	2.0070139030000003	8.34	0.56	2.2	5.9	-1.83	1.52	0.94
Pd3M-Pb	-0.896741	0.9344645559999999	-1.8565604340000001	1.3913703430000002	-0.020232426	7.860169937999999	2.238219385	8.34	0.56	2.2	5.9	-1.83	1.52	0.94
Pd3M-Bi	-0.709752	0.9338323159999999	-2.109616413	1.4676666569999999	-0.465119784	10.64946196	2.144377726	8.34	0.56	2.2	5.9	-1.83	1.52	0.94
Ni3M-Sc	-1.767011	0.880287927	-1.088849783	1.290325462	1.1655459240000001	5.996815613	1.724983835	7.64	1.16	1.91	5.77	-1.29	1.38	0.71
Ni3M-Ti	-1.473667	0.878033595	-1.337425294	1.3626588119999998	0.8427528059999999	5.146733277	1.790521636	7.64	1.16	1.91	5.77	-1.29	1.38	0.71
Ni3M-V	-1.2292379999999998	0.866931105	-1.595988479	1.403262941	0.742575758	4.967617089	1.821292245	7.64	1.16	1.91	5.77	-1.29	1.38	0.71
Ni3M-Cr	-1.506821	0.869552621	-1.386631051	1.38195384	0.6825875259999999	4.995978289	1.831284348	7.64	1.16	1.91	5.77	-1.29	1.38	0.71
Ni3M-Mn	-1.5318610000000001	0.872117358	-1.260627302	1.3708620319999998	0.6282846910000001	5.170914876	1.794001767	7.64	1.16	1.91	5.77	-1.29	1.38	0.71
Ni3M-Co	-1.319074	0.8674840629999999	-1.512367864	1.402938693	0.46841514100000003	4.884401511	1.9009500780000002	7.64	1.16	1.91	5.77	-1.29	1.38	0.71
Ni3M-Cu	-1.407158	0.869374291	-1.228559902	1.329445843	0.349954521	5.20249352	1.9069944859999999	7.64	1.16	1.91	5.77	-1.29	1.38	0.71
Ni3M-Zn	-1.388117	0.881835465	-1.2218987909999999	1.298388336	0.087386201	6.968432319	1.827967796	7.64	1.16	1.91	5.77	-1.29	1.38	0.71
Ni3M-Ga	-1.401274	0.8792202379999999	-1.214192967	1.3587800769999998	0.009108175999999999	9.243454168	1.879433352	7.64	1.16	1.91	5.77	-1.29	1.38	0.71
Ni3M-Zr	-1.519272	0.876992311	-1.2083232309999998	1.3247315929999999	1.0005942970000001	5.463867886	1.7134792490000001	7.64	1.16	1.91	5.77	-1.29	1.38	0.71
Ni3M-Nb	-0.8930899999999999	0.869092753	-1.694257277	1.4108809619999998	0.852421702	5.287046136	1.8111705669999998	7.64	1.16	1.91	5.77	-1.29	1.38	0.71
Ni3M-Mo	-1.00298	0.864525048	-1.6843027819999998	1.410736381	0.663802883	5.018535861	1.981798441	7.64	1.16	1.91	5.77	-1.29	1.38	0.71
Ni3M-Ru	-1.2629299999999999	0.866299345	-1.4468370030000002	1.382562042	0.39227528899999997	4.8169994	1.992737811	7.64	1.16	1.91	5.77	-1.29	1.38	0.71
Ni3M-Rh	-1.336125	0.868289364	-1.405093456	1.3730797780000001	0.34598995	4.8421958730000005	2.014205656	7.64	1.16	1.91	5.77	-1.29	1.38	0.71
Ni3M-Ag	-1.442138	0.8827523190000001	-1.210322077	1.26944748	0.074733609	6.327208727	1.91597814	7.64	1.16	1.91	5.77	-1.29	1.38	0.71
Ni3M-In	-1.343125	0.882659605	-1.111733616	1.286054379	-0.5777967310000001	16.90513126	1.8700333759999999	7.64	1.16	1.91	5.77	-1.29	1.38	0.71
Ni3M-Sn	-1.237124	0.884910383	-1.179596475	1.2989215570000001	0.232037537	8.394630624	1.9248645690000001	7.64	1.16	1.91	5.77	-1.29	1.38	0.71
Ni3M-La	-1.6974479999999998	0.883176255	-1.073575995	1.232466509	1.2318451240000001	6.361233637000001	1.6186060619999998	7.64	1.16	1.91	5.77	-1.29	1.38	0.71
Ni3M-Ta	-0.8176770000000001	0.868837815	-1.767806147	1.468539952	0.856019036	5.324233321	1.7764407819999999	7.64	1.16	1.91	5.77	-1.29	1.38	0.71
Ni3M-W	-0.787014	0.863801438	-1.8115641830000002	1.485843169	0.650527228	4.968923796	2.035152501	7.64	1.16	1.91	5.77	-1.29	1.38	0.71
Ni3M-Re	-0.967467	0.864446345	-1.741553313	1.497856663	0.44688124799999995	4.7260969280000005	1.9069944859999999	7.64	1.16	1.91	5.77	-1.29	1.38	0.71
Ni3M-Os	-1.076222	0.864705996	-1.5611723219999998	1.46757793	0.275615784	4.747128161	1.992737811	7.64	1.16	1.91	5.77	-1.29	1.38	0.71
Ni3M-Ir	-1.2964229999999999	0.8645948729999999	-1.3545376269999998	1.409949528	0.12225888800000001	4.9869217589999995	1.992737811	7.64	1.16	1.91	5.77	-1.29	1.38	0.71
Ni3M-Pt	-1.328044	0.870158361	-1.33667696	1.3786633659999998	0.046692853	5.146369538	2.014205656	7.64	1.16	1.91	5.77	-1.29	1.38	0.71
Ni3M-Au	-1.3804020000000001	0.873209758	-1.2148374720000001	1.322031411	-0.158489456	6.202369818999999	2.080527555	7.64	1.16	1.91	5.77	-1.29	1.38	0.71
Ni3M-Tl	-1.232489	0.887749655	-1.120799699	1.28510334	-0.658224456	14.91021731	1.817932951	7.64	1.16	1.91	5.77	-1.29	1.38	0.71
Ni3M-Pb	-1.185398	0.885226935	-1.111429915	1.2393443020000001	0.128685334	9.858965903	2.027356545	7.64	1.16	1.91	5.77	-1.29	1.38	0.71
Re3M-V	-1.708272	0.591092408	-0.6707332970000001	2.644308895	0.084976709	2.1112270580000003	1.8146120980000002	7.88	0.15	1.9	5.88	-0.51	1.52	1.2
Re3M-Cr	-1.6422740000000002	0.591341329	-0.7326470559999999	2.715547953	0.049430115	2.080276984	1.824567552	7.88	0.15	1.9	5.88	-0.51	1.52	1.2
Re3M-Mn	-1.589293	0.5872163739999999	-0.762922645	2.7604877230000002	0.022935341	2.046531041	1.7874217159999999	7.88	0.15	1.9	5.88	-0.51	1.52	1.2
Re3M-Co	-1.6973630000000002	0.5909379060000001	-0.90280626	2.766507888	-0.020054568000000002	2.0698377740000002	1.8939777619999998	7.88	0.15	1.9	5.88	-0.51	1.52	1.2
Re3M-Ni	-1.6614209999999998	0.589813888	-0.8638440540000001	2.744646193	-0.06449966	2.0871548630000003	1.90299449	7.88	0.15	1.9	5.88	-0.51	1.52	1.2
Re3M-Cu	-1.481631	0.590905356	-1.045499461	2.739805654	-0.100189594	2.12997005	1.9	7.88	0.15	1.9	5.88	-0.51	1.52	1.2
Re3M-Mo	-1.657282	0.587563624	-0.6268949770000001	2.700590572	0.069228154	2.120244423	1.9745295880000002	7.88	0.15	1.9	5.88	-0.51	1.52	1.2
Re3M-Rh	-1.743316	0.584648776	-0.851514533	2.775039607	-0.081996869	2.082666072	2.00681794	7.88	0.15	1.9	5.88	-0.51	1.52	1.2
Re3M-Pd	-1.662265	0.588620126	-0.793917113	2.7523467210000003	-0.143548346	2.106330136	1.985428835	7.88	0.15	1.9	5.88	-0.51	1.52	1.2
Re3M-Ag	-1.433081	0.590508149	-1.054890359	2.7541526189999996	-0.165564911	2.204913705	1.9089507030000001	7.88	0.15	1.9	5.88	-0.51	1.52	1.2
Re3M-Ta	-1.8274569999999999	0.592794854	-0.622583653	2.640328136	0.17550105100000002	2.2681377819999997	1.7699251409999999	7.88	0.15	1.9	5.88	-0.51	1.52	1.2
Re3M-W	-1.634671	0.589721136	-0.6587727210000001	2.7292478389999997	0.087806254	2.186444617	2.027687956	7.88	0.15	1.9	5.88	-0.51	1.52	1.2
Re3M-Os	-1.490851	0.593536194	-0.9148257329999999	2.895078266	-0.049503190999999995	2.097451368	1.985428835	7.88	0.15	1.9	5.88	-0.51	1.52	1.2
Re3M-Ir	-1.703313	0.587102187	-0.925114345	2.86404161	-0.11984189699999999	2.13169809	1.985428835	7.88	0.15	1.9	5.88	-0.51	1.52	1.2
Re3M-Pt	-1.637318	0.591085843	-0.837859067	2.838378459	-0.185884119	2.149950762	2.00681794	7.88	0.15	1.9	5.88	-0.51	1.52	1.2
Rh3M-Sc	-1.697171	0.8123719	-1.3699522530000001	1.796424438	0.8122217490000001	3.7803897689999997	1.952612501	7.46	1.14	2.28	5.91	-1.73	1.49	0.99
Rh3M-Ti	-1.703286	0.807957885	-1.6042404380000002	1.876136437	0.587221793	3.251282315	2.026798663	7.46	1.14	2.28	5.91	-1.73	1.49	0.99
Rh3M-V	-1.645399	0.7952160770000001	-1.757364886	1.952352035	0.47369124799999995	3.049261791	2.061629758	7.46	1.14	2.28	5.91	-1.73	1.49	0.99
Rh3M-Cr	-1.615599	0.7956322309999999	-1.72546554	1.9480487180000001	0.465507016	3.119293476	2.072940417	7.46	1.14	2.28	5.91	-1.73	1.49	0.99
Rh3M-Mn	-1.6435849999999999	0.7963742420000001	-1.657106956	1.929650705	0.42741522299999996	3.1842373360000003	2.030738032	7.46	1.14	2.28	5.91	-1.73	1.49	0.99
Rh3M-Co	-1.6151870000000002	0.79710329	-1.637073671	1.8819465640000002	0.34017486	3.180854758	2.15179923	7.46	1.14	2.28	5.91	-1.73	1.49	0.99
Rh3M-Ni	-1.6409479999999999	0.794249345	-1.627646865	1.865820288	0.33229225	3.2086393089999996	2.162043378	7.46	1.14	2.28	5.91	-1.73	1.49	0.99
Rh3M-Cu	-1.6827169999999998	0.796936502	-1.500211512	1.8176678819999998	0.31553073600000003	3.314564433	2.1586412569999998	7.46	1.14	2.28	5.91	-1.73	1.49	0.99
Rh3M-Zn	-1.548859	0.81185986	-1.488331284	1.796072893	0.18696695	3.821376659	2.069186214	7.46	1.14	2.28	5.91	-1.73	1.49	0.99
Rh3M-Ga	-1.409096	0.8125353890000001	-1.5377987780000002	1.874310238	0.100200725	4.578919109	2.1274431590000003	7.46	1.14	2.28	5.91	-1.73	1.49	0.99
Rh3M-Y	-1.7889540000000002	0.806698955	-1.196816255	1.7223301359999998	1.021248876	4.39732825	1.890002341	7.46	1.14	2.28	5.91	-1.73	1.49	0.99
Rh3M-Zr	-1.780943	0.805116162	-1.414016231	1.8556553709999999	0.778906275	3.59278916	1.939589772	7.46	1.14	2.28	5.91	-1.73	1.49	0.99
Rh3M-Nb	-1.719169	0.79751449	-1.628877045	1.94176649	0.541684541	3.0601090739999997	2.050172424	7.46	1.14	2.28	5.91	-1.73	1.49	0.99
Rh3M-Mo	-1.49075	0.790528232	-1.787179817	1.978987035	0.418796124	2.937748825	2.243316333	7.46	1.14	2.28	5.91	-1.73	1.49	0.99
Rh3M-Ru	-1.604015	0.7916689370000001	-1.7669933880000002	1.9109397830000001	0.313461255	3.034299411	2.25569926	7.46	1.14	2.28	5.91	-1.73	1.49	0.99
Rh3M-Pd	-1.781109	0.791283427	-1.531997679	1.796764361	0.200892824	3.2341159210000003	2.25569926	7.46	1.14	2.28	5.91	-1.73	1.49	0.99
Rh3M-Ag	-1.772616	0.7956831390000001	-1.3836499230000001	1.741508716	0.170034939	3.633860947	2.1688103919999997	7.46	1.14	2.28	5.91	-1.73	1.49	0.99
Rh3M-In	-1.442491	0.8094784629999999	-1.400375669	1.776290201	-0.320465285	7.873599769	2.116802762	7.46	1.14	2.28	5.91	-1.73	1.49	0.99
Rh3M-Ta	-1.7243099999999998	0.798142813	-1.636261721	2.015118482	0.5554852610000001	3.120763394	2.0108597009999998	7.46	1.14	2.28	5.91	-1.73	1.49	0.99
Rh3M-W	-1.4505540000000001	0.793177838	-1.8314214309999999	2.070805037	0.404942271	2.928269297	2.303710988	7.46	1.14	2.28	5.91	-1.73	1.49	0.99
Rh3M-Re	-1.338942	0.790733652	-1.968708128	2.094621496	0.318451475	2.8667178460000002	2.1586412569999998	7.46	1.14	2.28	5.91	-1.73	1.49	0.99
Rh3M-Ir	-1.6214899999999999	0.788052952	-1.761755427	1.960627176	0.175495438	3.053922038	2.25569926	7.46	1.14	2.28	5.91	-1.73	1.49	0.99
Rh3M-Pt	-1.7492869999999998	0.790266349	-1.619276947	1.8785945990000001	0.102102712	3.226991059	2.28	7.46	1.14	2.28	5.91	-1.73	1.49	0.99
Rh3M-Au	-1.749918	0.7922088359999999	-1.4371288880000002	1.797928392	0.036213535	3.595676517	2.355073729	7.46	1.14	2.28	5.91	-1.73	1.49	0.99
Rh3M-Tl	-1.392399	0.809624825	-1.353434038	1.771754735	-0.38710512399999997	7.110161237000001	2.057827171	7.46	1.14	2.28	5.91	-1.73	1.49	0.99
Ir3M-Sc	-1.910275	0.786732696	-1.601762577	2.19490975	0.539762749	3.149752	1.904397265	9.1	1.57	2.2	6.63	-2.11	1.5	1.08
Ir3M-Ti	-1.977789	0.7855402359999999	-1.8330833480000002	2.2953561380000003	0.380876696	2.787855237	1.976751572	9.1	1.57	2.2	6.63	-2.11	1.5	1.08
Ir3M-Ni	-1.842761	0.7722195540000001	-1.9693879980000002	2.306804076	0.169120644	2.734154918	2.108656732	9.1	1.57	2.2	6.63	-2.11	1.5	1.08
Ir3M-Cu	-1.869845	0.7746851359999999	-1.844645799	2.252898949	0.166101898	2.793486611	2.105338619	9.1	1.57	2.2	6.63	-2.11	1.5	1.08
Ir3M-Zn	-1.7339650000000002	0.787689827	-1.80182975	2.206696766	0.083345566	3.0718221860000003	2.01809246	9.1	1.57	2.2	6.63	-2.11	1.5	1.08
Ir3M-Ga	-1.7293029999999998	0.791655349	-1.8550337430000001	2.298199899	0.02486268	3.4910957039999997	2.074910885	9.1	1.57	2.2	6.63	-2.11	1.5	1.08
Ir3M-Y	-1.981155	0.7863574659999999	-1.464647239	2.085173536	0.666363439	3.5192395760000004	1.843333118	9.1	1.57	2.2	6.63	-2.11	1.5	1.08
Ir3M-Zr	-2.040725	0.7838616279999999	-1.621928877	2.246245166	0.533996565	3.0397940689999996	1.8916961019999998	9.1	1.57	2.2	6.63	-2.11	1.5	1.08
Ir3M-Nb	-1.845207	0.777213492	-1.8356761430000001	2.350685763	0.363152656	2.67515638	1.999548172	9.1	1.57	2.2	6.63	-2.11	1.5	1.08
Ir3M-Mo	-1.581226	0.7699281859999999	-2.050642685	2.39904352	0.280835727	2.589119181	2.18792284	9.1	1.57	2.2	6.63	-2.11	1.5	1.08
Ir3M-Ru	-1.780476	0.767160775	-2.035151122	2.3474043	0.163340493	2.594280227	2.2	9.1	1.57	2.2	6.63	-2.11	1.5	1.08
Ir3M-Rh	-1.8190490000000001	0.7697743290000001	-2.017752111	2.313034168	0.11967027599999999	2.6559075659999998	2.223700689	9.1	1.57	2.2	6.63	-2.11	1.5	1.08
Ir3M-Pd	-1.9885529999999998	0.7713778929999999	-1.8662157209999999	2.226090734	0.07802730599999999	2.734820351	2.2	9.1	1.57	2.2	6.63	-2.11	1.5	1.08
Ir3M-Ag	-2.0098119999999997	0.768103615	-1.68668871	2.162844499	0.056557231	2.9292679919999998	2.115256651	9.1	1.57	2.2	6.63	-2.11	1.5	1.08
Ir3M-La	-1.9681080000000002	0.7883757029999999	-1.42962098	2.015551668	0.5863262810000001	3.84851158	1.786955272	9.1	1.57	2.2	6.63	-2.11	1.5	1.08
Ir3M-Ta	-1.852168	0.7773667870000001	-1.83469277	2.412413242	0.379752395	2.7157305110000003	1.961206185	9.1	1.57	2.2	6.63	-2.11	1.5	1.08
Ir3M-W	-1.541144	0.771588462	-2.110989949	2.4842578509999997	0.282795703	2.5916653259999998	2.24682619	9.1	1.57	2.2	6.63	-2.11	1.5	1.08
Ir3M-Re	-1.447916	0.7686485540000001	-2.239592708	2.518071075	0.224829698	2.542789347	2.105338619	9.1	1.57	2.2	6.63	-2.11	1.5	1.08
Ir3M-Os	-1.608018	0.770074919	-2.2068249	2.476140865	0.156936257	2.55311774	2.2	9.1	1.57	2.2	6.63	-2.11	1.5	1.08
Ir3M-Pt	-1.956184	0.769917482	-1.958488935	2.31679721	0.013913118	2.732763171	2.223700689	9.1	1.57	2.2	6.63	-2.11	1.5	1.08
Ir3M-Au	-1.9984529999999998	0.775684108	-1.792757509	2.2201309680000003	-0.022955187000000002	2.9128220839999996	2.296920647	9.1	1.57	2.2	6.63	-2.11	1.5	1.08
Ir3M-Bi	-1.794044	0.799275113	-1.752518356	2.180020421	-0.322187727	4.783200279	2.144377726	9.1	1.57	2.2	6.63	-2.11	1.5	1.08
Ag3M-Bi-Ti	-1.181179	0.22332523199999998	0.837948565	1.6431703690000001	-0.9237798070000001	6.270222047000001	1.886920706	6.83	0.08	1.54	4.63	1.5	1.61	1.08
Ag3M-Bi-V	-1.301766	0.37265133100000003	0.882000144	1.9138834880000002	-0.647345176	4.0193162739999995	1.897668456	6.75	0.53	1.63	4.88	1.06	1.49	0.98
Ag3M-Bi-Cr	-0.9388299999999999	0.48414582899999997	0.689299095	2.247559543	-0.236671627	2.457562718	1.9011325030000001	6.77	0.67	1.66	5.27	0.16	1.42	0.9
Ag3M-Bi-Mn	-0.742196	0.521884548	-1.232164319	2.434956199	0.140354126	1.778007835	1.8881424130000002	7.43	0.0	1.55	5.45	0.07	1.43	0.86
Ag3M-Bi-Co	-1.80902	0.767402805	-0.9982023390000001	1.407886535	-0.136476121	4.932671362	1.924940735	7.88	0.66	1.88	5.76	-1.17	1.39	0.76
Ag3M-Bi-Ni	-1.7753830000000002	0.8952837709999999	-0.613679157	1.045198446	-0.842813314	12.34300518	1.9279906119999999	7.64	1.16	1.91	5.77	-1.29	1.38	0.71
Ag3M-Bi-Cu	-0.511447	0.977983708	-2.07573724	0.908767035	0.137508256	14.88419685	1.9269788069999998	7.73	1.24	1.9	5.3	-2.67	1.41	0.67
Ag3M-Bi-Nb	-1.535984	0.41036775299999995	0.20064415600000002	2.035150415	-0.820296369	4.298648313999999	1.894146546	6.76	0.9	1.6	4.69	1.41	1.62	1.28
Ag3M-Bi-Mo	-1.583307	0.496041069	-0.11020617199999999	2.059515771	-0.472149117	3.471238874	1.951852311	7.09	0.75	2.16	5.09	0.35	1.55	1.2
Ag3M-Bi-Ru	-2.28958	0.738879643	-0.812187023	1.6665109619999998	-0.48311760299999995	4.6963249000000005	1.95543708	7.36	1.05	2.2	5.73	-1.41	1.48	1.05
Ag3M-Bi-Rh	-2.104443	0.82690144	-0.735003249	1.470988591	-0.453161427	6.017242133	1.962434014	7.46	1.14	2.28	5.91	-1.73	1.49	0.99
Ag3M-Bi-Pd	-1.1935559999999998	0.9372143340000001	-1.544110656	1.307087734	-0.127533374	6.790529672999999	1.95543708	8.34	0.56	2.2	5.9	-1.83	1.52	0.94
Ag3M-Bi-Os	-2.960816	0.708565207	-0.7685208609999999	1.8445040940000001	-0.581487286	4.277200317	1.95543708	8.7	1.1	2.2	6.25	-1.5	1.49	1.13
Ag3M-Bi-Ir	-2.610407	0.809995024	-0.901043033	1.683389288	-0.45154288299999995	4.786759256	1.95543708	9.1	1.57	2.2	6.63	-2.11	1.5	1.08
Ag3M-Bi-Pt	-1.66402	0.9099306359999999	-1.51550997	1.513225513	-0.066732769	5.379168507	1.962434014	9.0	2.13	2.28	6.74	-2.25	1.53	1.04
Ag3M-Bi-Au	-0.047002999999999996	0.970527725	-3.466710293	1.313996341	1.495299265	10.098166800000001	1.98374091	9.23	2.31	2.54	6.01	-3.56	1.59	1.01
Au3M-Bi-Ti	-1.0298	0.229226122	0.7188260009999999	1.809871906	-1.108952717	6.051544806	2.416030525	6.83	0.08	1.54	4.63	1.5	1.61	1.08
Au3M-Bi-Cr	-0.887863	0.48205210299999995	0.721163903	2.3781887000000004	-0.36474492700000005	2.65605319	2.43422744	6.77	0.67	1.66	5.27	0.16	1.42	0.9
Au3M-Bi-Mn	-0.49658	0.522595361	-1.147283151	2.5312342969999997	0.071123819	1.753878368	2.417594811	7.43	0.0	1.55	5.45	0.07	1.43	0.86
Au3M-Bi-Co	-1.545199	0.7701218190000001	-1.0963207590000001	1.533745234	-0.253254495	4.555456476	2.464711718	7.88	0.66	1.88	5.76	-1.17	1.39	0.76
Au3M-Bi-Ni	-1.509132	0.884497977	-0.729314377	1.174218147	-0.838441818	9.620863707	2.468616808	7.64	1.16	1.91	5.77	-1.29	1.38	0.71
Au3M-Bi-Nb	-1.381039	0.38940293	0.095356066	2.335627164	-0.8547223290000001	3.805568664	2.425282557	6.76	0.9	1.6	4.69	1.41	1.62	1.28
Au3M-Bi-Mo	-1.440251	0.492444823	-0.24884198800000001	2.29719644	-0.5671281579999999	3.3119044189999998	2.499169546	7.09	0.75	2.16	5.09	0.35	1.55	1.2
Au3M-Bi-Ru	-2.168501	0.708216928	-0.9062083009999999	1.875417656	-0.491120063	4.054659803	2.5037595169999998	7.36	1.05	2.2	5.73	-1.41	1.48	1.05
Au3M-Bi-Rh	-1.877262	0.8183927120000001	-0.9297299290000001	1.675051445	-0.40570368100000004	4.900689645	2.512718456	7.46	1.14	2.28	5.91	-1.73	1.49	0.99
Au3M-Bi-Pd	-1.127605	0.9286152059999999	-1.482483545	1.472184605	-0.227914562	5.344926185	2.5037595169999998	8.34	0.56	2.2	5.9	-1.83	1.52	0.94
Au3M-Bi-Ag	0.039425999999999996	0.979517467	-3.796386278	1.247430997	1.652095265	10.66833746	2.471189647	7.58	1.3	1.93	5.01	-4.3	1.59	0.89
Au3M-Bi-Re	-2.43266	0.5796765629999999	-0.755182334	2.326868525	-0.5259914920000001	3.2619870110000004	2.467321284	7.88	0.15	1.9	5.88	-0.51	1.52	1.2
Au3M-Bi-Os	-2.6855689999999997	0.7020050440000001	-0.898691017	2.114575819	-0.537226498	3.6255245489999997	2.5037595169999998	8.7	1.1	2.2	6.25	-1.5	1.49	1.13
Au3M-Bi-Ir	-2.376615	0.798762841	-1.134860931	1.94086783	-0.354301365	3.883588188	2.5037595169999998	9.1	1.57	2.2	6.63	-2.11	1.5	1.08
Au3M-Bi-Pt	-1.6709169999999998	0.8999418709999999	-1.569142609	1.726187088	-0.076118055	4.3212093419999995	2.512718456	9.0	2.13	2.28	6.74	-2.25	1.53	1.04
Cu3M-Bi-Ti	-0.9615100000000001	0.23044663899999998	0.648896316	1.694856475	-0.711978634	4.76294807	1.860502736	6.83	0.08	1.54	4.63	1.5	1.61	1.08
Cu3M-Bi-V	-1.224042	0.37221123799999994	0.585487881	1.955123434	-0.486271856	3.321983271	1.871100011	6.75	0.53	1.63	4.88	1.06	1.49	0.98
Cu3M-Bi-Cr	-1.1109229999999999	0.483899852	0.444445185	2.2549502919999997	-0.159643321	2.282341614	1.87451556	6.77	0.67	1.66	5.27	0.16	1.42	0.9
Cu3M-Bi-Mn	-0.78257	0.528757615	-1.0025155190000001	2.386191674	0.152916393	1.8264522680000002	1.861707339	7.43	0.0	1.55	5.45	0.07	1.43	0.86
Cu3M-Bi-Co	-1.850613	0.7559939990000001	-1.016919259	1.4968466459999998	0.089124706	4.001430077	1.8979904630000002	7.88	0.66	1.88	5.76	-1.17	1.39	0.76
Cu3M-Bi-Ni	-1.6465560000000001	0.8836497390000001	-0.8820778359999999	1.236816289	-0.007104539	6.460060942999999	1.900997639	7.64	1.16	1.91	5.77	-1.29	1.38	0.71
Cu3M-Bi-Nb	-1.3006229999999999	0.39146776200000005	-0.021328033	2.075843124	-0.47292953600000004	3.325816834	1.86762741	6.76	0.9	1.6	4.69	1.41	1.62	1.28
Cu3M-Bi-Mo	-1.588257	0.5074829000000001	-0.326427015	2.113975554	-0.268260467	2.955264076	1.9245252609999999	7.09	0.75	2.16	5.09	0.35	1.55	1.2
Cu3M-Bi-Ru	-2.049821	0.7368567229999999	-0.903431467	1.822879884	0.0029309759999999996	3.483906391	1.9280598409999998	7.36	1.05	2.2	5.73	-1.41	1.48	1.05
Cu3M-Bi-Rh	-1.834111	0.817950229	-1.178931936	1.7102422240000001	0.27449296300000003	3.845540213	1.934958815	7.46	1.14	2.28	5.91	-1.73	1.49	0.99
Cu3M-Bi-Pd	-1.0589309999999998	0.9293420990000001	-2.076005097	1.5041725469999998	0.743638523	4.911080267	1.9280598409999998	8.34	0.56	2.2	5.9	-1.83	1.52	0.94
Cu3M-Bi-Ag	0.013728	0.97389823	-4.205475527	1.3051233770000001	2.655863579	13.51002879	1.902978895	7.58	1.3	1.93	5.01	-4.3	1.59	0.89
Cu3M-Bi-Ta	-1.452193	0.36044354100000003	0.09102492599999999	2.274039104	-0.486921551	3.113957487	1.855612831	7.89	0.32	1.5	4.86	2.0	1.62	1.34
Cu3M-Bi-W	-2.019184	0.482449499	-0.31954559	2.231078856	-0.335273607	3.006116688	1.941643267	7.98	0.86	2.36	5.09	0.77	1.56	1.27
Cu3M-Bi-Re	-2.3533630000000003	0.606024505	-0.71746567	2.179266057	-0.204008721	2.938825937	1.9	7.88	0.15	1.9	5.88	-0.51	1.52	1.2
Cu3M-Bi-Os	-2.53073	0.710072485	-1.024793396	2.072449714	-0.040566119	3.0057643460000003	1.9280598409999998	8.7	1.1	2.2	6.25	-1.5	1.49	1.13
Cu3M-Bi-Ir	-2.252579	0.8033031559999999	-1.4070992919999998	1.9441542459999999	0.23438894600000001	3.2727396110000004	1.9280598409999998	9.1	1.57	2.2	6.63	-2.11	1.5	1.08
Cu3M-Bi-Pt	-1.470539	0.897923348	-2.060338427	1.751446566	0.6581482439999999	4.048579516	1.934958815	9.0	2.13	2.28	6.74	-2.25	1.53	1.04
Cu3M-Bi-Au	-0.030976	0.961031075	-3.8722317339999996	1.5376104680000002	1.9026957009999999	8.544841629	1.955967402	9.23	2.31	2.54	6.01	-3.56	1.59	1.01
Pt3M-Bi-Ti	-0.838341	0.2255616	0.481119907	1.998200885	-1.1634817990000001	4.775119158	2.192266939	6.83	0.08	1.54	4.63	1.5	1.61	1.08
Pt3M-Bi-V	-1.160519	0.361089824	0.20116522	2.0450186809999997	-0.915028031	3.956384948	2.204753916	6.75	0.53	1.63	4.88	1.06	1.49	0.98
Pt3M-Bi-Cr	-0.9717790000000001	0.472567609	0.282478309	2.3529285140000002	-0.430104669	2.556012651	2.208778525	6.77	0.67	1.66	5.27	0.16	1.42	0.9
Pt3M-Bi-Mn	-0.533573	0.528556978	-0.4451405	2.49874719	-0.041021398	1.7902322380000002	2.193686346	7.43	0.0	1.55	5.45	0.07	1.43	0.86
Pt3M-Bi-Co	-1.3546790000000002	0.756914358	-1.390390996	1.6898864569999998	-0.143244547	3.244616892	2.236439464	7.88	0.66	1.88	5.76	-1.17	1.39	0.76
Pt3M-Bi-Cu	-0.393751	0.970003528	-1.875682091	1.0996626809999999	-0.12416151800000001	6.916026266	2.238807342	7.73	1.24	1.9	5.3	-2.67	1.41	0.67
Pt3M-Bi-Nb	-1.305833	0.38039512	-0.449207106	2.535685488	-0.703352595	2.954758151	2.200662082	6.76	0.9	1.6	4.69	1.41	1.62	1.28
Pt3M-Bi-Mo	-1.638534	0.48931435700000003	-0.6154699539999999	2.373704504	-0.588111521	2.9558777810000003	2.2677059390000003	7.09	0.75	2.16	5.09	0.35	1.55	1.2
Pt3M-Bi-Ru	-1.8564009999999997	0.701409831	-1.245101569	2.051257056	-0.31992707800000003	3.0801714810000003	2.271870804	7.36	1.05	2.2	5.73	-1.41	1.48	1.05
Pt3M-Bi-Rh	-1.7482060000000001	0.786540885	-1.45501348	1.878744309	-0.123667949	3.412919238	2.28	7.46	1.14	2.28	5.91	-1.73	1.49	0.99
Pt3M-Bi-Pd	-1.004422	0.9099990720000001	-1.904638368	1.6156449869999998	0.091912677	3.827154312	2.271870804	8.34	0.56	2.2	5.9	-1.83	1.52	0.94
Pt3M-Bi-Ag	0.045297000000000004	0.974587667	-3.420314898	1.333012448	1.4122730069999998	7.187454719	2.2423174319999997	7.58	1.3	1.93	5.01	-4.3	1.59	0.89
Pt3M-Bi-Ta	-1.4319790000000001	0.35003453	-0.340970785	2.7454482660000004	-0.713993682	2.860110031	2.1865050669999997	7.89	0.32	1.5	4.86	2.0	1.62	1.34
Pt3M-Bi-W	-1.933878	0.45290191	-0.680052329	2.560343598	-0.5984347210000001	2.904536448	2.287876422	7.98	0.86	2.36	5.09	0.77	1.56	1.27
Pt3M-Bi-Re	-2.2237430000000002	0.575442377	-1.050658325	2.493645009	-0.443933322	2.7309226019999997	2.238807342	7.88	0.15	1.9	5.88	-0.51	1.52	1.2
Pt3M-Bi-Os	-2.3115740000000002	0.682789277	-1.348180647	2.346860171	-0.314605937	2.741466265	2.271870804	8.7	1.1	2.2	6.25	-1.5	1.49	1.13
Pt3M-Bi-Ir	-2.057173	0.77322972	-1.702820066	2.1612956480000003	-0.06889267	2.8546218760000004	2.271870804	9.1	1.57	2.2	6.63	-2.11	1.5	1.08
Pt3M-Bi-Au	-0.046968	0.960753669	-3.1382464060000004	1.58250983	0.963460225	4.943288197	2.304754831	9.23	2.31	2.54	6.01	-3.56	1.59	1.01
Pd3M-Bi-Ti	-0.8501280000000001	0.221256194	0.45816968799999996	1.81392191	-1.001909004	4.587859012	2.1229144090000003	6.83	0.08	1.54	4.63	1.5	1.61	1.08
Pd3M-Bi-V	-1.1926350000000001	0.362541099	0.32742165300000003	1.908875581	-0.6802952520000001	3.417185017	2.13500636	6.75	0.53	1.63	4.88	1.06	1.49	0.98
Pd3M-Bi-Cr	-0.9262610000000001	0.463627543	0.47985407399999996	2.237093074	-0.253714507	2.123305304	2.13890365	6.77	0.67	1.66	5.27	0.16	1.42	0.9
Pd3M-Bi-Co	-1.515007	0.751277303	-1.367505016	1.610881148	0.105744151	2.908099146	2.165689534	7.88	0.66	1.88	5.76	-1.17	1.39	0.76
Pd3M-Bi-Ni	-1.515112	0.8521584240000001	-1.06513191	1.2245095609999999	-0.017600528	5.101051839	2.169120853	7.64	1.16	1.91	5.77	-1.29	1.38	0.71
Pd3M-Bi-Cu	-0.686005	0.97304531	-1.6111398380000002	0.9961434920000001	0.32704767100000004	6.988088297999999	2.167982503	7.73	1.24	1.9	5.3	-2.67	1.41	0.67
Pd3M-Bi-Nb	-1.433942	0.374103546	-0.359050252	2.182041138	-0.7026992670000001	3.182050195	2.131043972	6.76	0.9	1.6	4.69	1.41	1.62	1.28
Pd3M-Bi-Mo	-1.625644	0.484440475	-0.381089036	2.135426564	-0.48722871100000004	2.861793673	2.195966891	7.09	0.75	2.16	5.09	0.35	1.55	1.2
Pd3M-Bi-Ru	-2.014139	0.699177253	-1.195670133	1.847822695	-0.080455871	2.89887162	2.2	7.36	1.05	2.2	5.73	-1.41	1.48	1.05
Pd3M-Bi-Rh	-1.931687	0.7950102309999999	-1.302114864	1.666095585	0.10138054199999999	3.488050496	2.207872028	7.46	1.14	2.28	5.91	-1.73	1.49	0.99
Pd3M-Bi-Ag	-0.096441	0.9783813509999999	-3.2622196060000004	1.209403378	1.976161676	9.071559317	2.171381551	7.58	1.3	1.93	5.01	-4.3	1.59	0.89
Pd3M-Bi-Ta	-1.554301	0.341970137	-0.26955981	2.3875129580000003	-0.72560642	3.0934333689999995	2.117334815	7.89	0.32	1.5	4.86	2.0	1.62	1.34
Pd3M-Bi-W	-1.975426	0.44855808799999997	-0.45249910299999996	2.26724411	-0.573576186	2.983687965	2.215499279	7.98	0.86	2.36	5.09	0.77	1.56	1.27
Pd3M-Bi-Re	-2.2028689999999997	0.571509354	-0.904226705	2.231118205	-0.345927164	2.652084056	2.167982503	7.88	0.15	1.9	5.88	-0.51	1.52	1.2
Pd3M-Bi-Os	-2.449218	0.679725804	-1.188397832	2.063344473	-0.20681946899999998	2.73790595	2.2	8.7	1.1	2.2	6.25	-1.5	1.49	1.13
Pd3M-Bi-Ir	-2.1867810000000003	0.775951055	-1.4667641230000001	1.900945781	0.064780863	2.958586436	2.2	9.1	1.57	2.2	6.63	-2.11	1.5	1.08
Ni3M-Bi-Ti	-0.8199200000000001	0.234607685	0.715083641	1.9670242119999999	-0.674617963	3.407305165	1.8693133290000001	6.83	0.08	1.54	4.63	1.5	1.61	1.08
Ni3M-Bi-V	-1.322586	0.36207833700000003	-0.013753333000000001	1.948896138	-0.45690860200000005	3.165147657	1.8799607880000002	6.75	0.53	1.63	4.88	1.06	1.49	0.98
Ni3M-Bi-Cr	-1.181944	0.479882535	0.041885082000000004	2.2120438890000003	-0.17202156899999999	2.23499394	1.883392512	6.77	0.67	1.66	5.27	0.16	1.42	0.9
Ni3M-Bi-Mn	-0.933464	0.53944696	-0.385587765	2.3545001130000003	0.09482742	1.844399643	1.870523636	7.43	0.0	1.55	5.45	0.07	1.43	0.86
Ni3M-Bi-Co	-1.515196	0.764678049	-1.477222179	1.672395545	0.334207049	3.2996334380000003	1.900718594	7.88	0.66	1.88	5.76	-1.17	1.39	0.76
Ni3M-Bi-Cu	-0.513936	0.9657585809999999	-2.276087204	1.123437749	1.203405329	7.702041378	1.9089976359999998	7.73	1.24	1.9	5.3	-2.67	1.41	0.67
Ni3M-Bi-Nb	-1.283115	0.394058915	-0.33675601899999996	2.346335767	-0.300876886	2.492544176	1.8764717419999999	6.76	0.9	1.6	4.69	1.41	1.62	1.28
Ni3M-Bi-Mo	-1.632326	0.49976497299999995	-0.76795418	2.2303290319999998	-0.124551414	2.578488343	1.933639039	7.09	0.75	2.16	5.09	0.35	1.55	1.2
Ni3M-Bi-Ru	-1.783887	0.717921248	-1.4046268990000002	1.998420399	0.294170156	2.9413803410000003	1.937190357	7.36	1.05	2.2	5.73	-1.41	1.48	1.05
Ni3M-Bi-Rh	-1.6734069999999999	0.80530072	-1.661211964	1.858723127	0.532357823	3.462874457	1.9441220019999998	7.46	1.14	2.28	5.91	-1.73	1.49	0.99
Ni3M-Bi-Ag	-0.020053	0.9696326959999999	-3.978672397	1.3457195690000001	2.503872149	11.18900946	1.911990638	7.58	1.3	1.93	5.01	-4.3	1.59	0.89
Ni3M-Bi-Ta	-1.413007	0.36117996700000005	-0.197962232	2.529298053	-0.36323717	2.413615858	1.864400267	7.89	0.32	1.5	4.86	2.0	1.62	1.34
Ni3M-Bi-W	-1.8018299999999998	0.46318777299999997	-0.708866076	2.431115825	-0.186352933	2.445488622	1.950838109	7.98	0.86	2.36	5.09	0.77	1.56	1.27
Ni3M-Bi-Re	-2.17687	0.588434204	-1.156709225	2.355522584	-0.014635365	2.48343823	1.9089976359999998	7.88	0.15	1.9	5.88	-0.51	1.52	1.2
Ni3M-Bi-Os	-2.231974	0.690544191	-1.493918965	2.243686067	0.198803845	2.630578503	1.937190357	8.7	1.1	2.2	6.25	-1.5	1.49	1.13
Ni3M-Bi-Ir	-1.9963349999999997	0.782123132	-1.867754137	2.097379751	0.495524831	3.0110726239999996	1.937190357	9.1	1.57	2.2	6.63	-2.11	1.5	1.08
Ni3M-Bi-Pt	-1.281009	0.881639197	-2.467512794	1.885835238	0.889436052	3.91450639	1.9441220019999998	9.0	2.13	2.28	6.74	-2.25	1.53	1.04
Re3M-Bi-V	-1.165894	0.375444149	0.517201739	2.104557658	-0.549875569	3.2115377410000003	1.871100011	6.75	0.53	1.63	4.88	1.06	1.49	0.98
Re3M-Bi-Cr	-1.359738	0.492224657	0.103863947	2.253373397	-0.281036565	2.687010758	1.87451556	6.77	0.67	1.66	5.27	0.16	1.42	0.9
Re3M-Bi-Mn	-1.580182	0.563252906	-0.16809865300000001	1.9941279230000002	-0.187945676	3.28852539	1.861707339	7.43	0.0	1.55	5.45	0.07	1.43	0.86
Re3M-Bi-Co	-1.506394	0.78107112	-1.068900205	1.7569247209999999	0.17793421	3.9296045439999996	1.8979904630000002	7.88	0.66	1.88	5.76	-1.17	1.39	0.76
Re3M-Bi-Ni	-1.1993790000000002	0.869839198	-1.5208535230000002	1.616944955	0.498637528	4.6181861369999995	1.900997639	7.64	1.16	1.91	5.77	-1.29	1.38	0.71
Re3M-Bi-Cu	-0.302706	0.959262292	-3.045838546	1.327199871	1.355145344	7.730906122	1.9	7.73	1.24	1.9	5.3	-2.67	1.41	0.67
Re3M-Bi-Mo	-1.2237959999999999	0.509441966	-0.145223943	2.635934109	-0.18520480399999997	2.227524605	1.9245252609999999	7.09	0.75	2.16	5.09	0.35	1.55	1.2
Re3M-Bi-Rh	-1.2670290000000002	0.7956622990000001	-1.940783271	2.320359309	0.554594193	2.965128203	1.934958815	7.46	1.14	2.28	5.91	-1.73	1.49	0.99
Re3M-Bi-Pd	-0.7702	0.9038699240000001	-2.866145669	2.032255029	1.01674892	4.148834175	1.9280598409999998	8.34	0.56	2.2	5.9	-1.83	1.52	0.94
Re3M-Bi-Ag	0.123918	0.961098892	-4.614410435	1.699419483	2.123622649	8.494550538	1.902978895	7.58	1.3	1.93	5.01	-4.3	1.59	0.89
Re3M-Bi-Ta	-1.119153	0.373013618	0.675157004	2.777169176	-0.46021733600000003	2.2421591469999997	1.855612831	7.89	0.32	1.5	4.86	2.0	1.62	1.34
Re3M-Bi-W	-1.280191	0.472092581	-0.00115964	2.8187338630000003	-0.216610898	2.110822644	1.941643267	7.98	0.86	2.36	5.09	0.77	1.56	1.27
Re3M-Bi-Os	-1.450768	0.6911260859999999	-1.529977586	2.7581159619999998	0.268785025	2.3039455859999998	1.9280598409999998	8.7	1.1	2.2	6.25	-1.5	1.49	1.13
Re3M-Bi-Ir	-1.470135	0.778257323	-2.1509730780000003	2.598984876	0.550058744	2.7021364510000003	1.9280598409999998	9.1	1.57	2.2	6.63	-2.11	1.5	1.08
Re3M-Bi-Pt	-1.071688	0.8673687440000001	-2.88368908	2.406993546	0.920959443	3.4259091460000004	1.934958815	9.0	2.13	2.28	6.74	-2.25	1.53	1.04
Rh3M-Bi-Ti	-0.815237	0.2289971	0.818977767	1.992444681	-1.021851043	3.7776517610000004	2.192266939	6.83	0.08	1.54	4.63	1.5	1.61	1.08
Rh3M-Bi-V	-1.231595	0.36450795399999997	-0.00327515	1.929328544	-0.7709015090000001	3.4647879269999997	2.204753916	6.75	0.53	1.63	4.88	1.06	1.49	0.98
Rh3M-Bi-Cr	-1.1238700000000001	0.471465829	0.074010721	2.2566061630000003	-0.31506987	2.235678839	2.208778525	6.77	0.67	1.66	5.27	0.16	1.42	0.9
Rh3M-Bi-Mn	-0.8845959999999999	0.530767771	-0.531393947	2.422787681	0.002052029	1.7465733319999999	2.193686346	7.43	0.0	1.55	5.45	0.07	1.43	0.86
Rh3M-Bi-Co	-1.5583989999999999	0.757281312	-1.384944809	1.67335918	0.152142072	2.9215099589999998	2.236439464	7.88	0.66	1.88	5.76	-1.17	1.39	0.76
Rh3M-Bi-Ni	-1.387893	0.8641927359999999	-1.36997653	1.347673016	0.15581451	4.6388363660000005	2.23998288	7.64	1.16	1.91	5.77	-1.29	1.38	0.71
Rh3M-Bi-Cu	-0.595665	0.964526762	-2.039023003	1.090317203	0.7405723009999999	6.7114445929999995	2.238807342	7.73	1.24	1.9	5.3	-2.67	1.41	0.67
Rh3M-Bi-Nb	-1.038507	0.37417002200000005	-0.006838693000000001	2.44988478	-0.591943196	2.293817885	2.200662082	6.76	0.9	1.6	4.69	1.41	1.62	1.28
Rh3M-Bi-Mo	-1.520205	0.48271215799999995	-0.663335239	2.3202586259999998	-0.359887835	2.376598256	2.2677059390000003	7.09	0.75	2.16	5.09	0.35	1.55	1.2
Rh3M-Bi-Ru	-1.8612229999999998	0.7107805859999999	-1.3404939790000001	1.9910337669999998	-0.010067636	2.7787776319999997	2.271870804	7.36	1.05	2.2	5.73	-1.41	1.48	1.05
Rh3M-Bi-Pd	-1.049519	0.904270696	-2.245322674	1.607200236	0.660571716	3.866651821	2.271870804	8.34	0.56	2.2	5.9	-1.83	1.52	0.94
Rh3M-Bi-Ag	-0.06543099999999999	0.9698949490000001	-3.562233238	1.328343698	2.030969589	8.757620717	2.2423174319999997	7.58	1.3	1.93	5.01	-4.3	1.59	0.89
Rh3M-Bi-Ta	-1.008545	0.340968702	0.24595889899999998	2.631571444	-0.649025783	2.2668589619999997	2.1865050669999997	7.89	0.32	1.5	4.86	2.0	1.62	1.34
Rh3M-Bi-W	-1.56732	0.445032699	-0.552962026	2.539427914	-0.394160626	2.249574205	2.287876422	7.98	0.86	2.36	5.09	0.77	1.56	1.27
Rh3M-Bi-Re	-2.142398	0.568218306	-1.127348091	2.408089837	-0.20617039199999998	2.332181219	2.238807342	7.88	0.15	1.9	5.88	-0.51	1.52	1.2
Rh3M-Bi-Ir	-1.9650310000000002	0.77058147	-1.8514105769999998	2.120043424	0.238569196	2.7132946660000004	2.271870804	9.1	1.57	2.2	6.63	-2.11	1.5	1.08
Rh3M-Bi-Pt	-1.345105	0.866646335	-2.390141978	1.8967344030000002	0.632715289	3.3501527660000003	2.28	9.0	2.13	2.28	6.74	-2.25	1.53	1.04
Ir3M-Bi-Ti	-0.727165	0.22904322100000002	0.965352122	2.161751149	-1.215222118	4.294260941	2.1229144090000003	6.83	0.08	1.54	4.63	1.5	1.61	1.08
Ir3M-Bi-Ni	-1.12832	0.86420401	-1.4993278069999998	1.454351061	-0.201899109	4.901206855	2.169120853	7.64	1.16	1.91	5.77	-1.29	1.38	0.71
Ir3M-Bi-Cu	-0.305006	0.9616604240000001	-2.271215036	1.193592939	0.327971296	6.362378101	2.167982503	7.73	1.24	1.9	5.3	-2.67	1.41	0.67
Ir3M-Bi-Nb	-1.0313350000000001	0.38102911100000003	-0.016543318	2.73471141	-0.714351015	2.502610952	2.131043972	6.76	0.9	1.6	4.69	1.41	1.62	1.28
Ir3M-Bi-Mo	-1.482237	0.48931616200000005	-0.7292124790000001	2.588756908	-0.48555285200000003	2.550969601	2.195966891	7.09	0.75	2.16	5.09	0.35	1.55	1.2
Ir3M-Bi-Ru	-1.656077	0.706911706	-1.4751264309999998	2.257858356	-0.195487647	2.765707578	2.2	7.36	1.05	2.2	5.73	-1.41	1.48	1.05
Ir3M-Bi-Rh	-1.478868	0.78654834	-1.925800491	2.119875963	0.057705516	2.956343333	2.207872028	7.46	1.14	2.28	5.91	-1.73	1.49	0.99
Ir3M-Bi-Pd	-0.8425219999999999	0.899496071	-2.506048464	1.817228831	0.38237001	3.50043419	2.2	8.34	0.56	2.2	5.9	-1.83	1.52	0.94
Ir3M-Bi-Ag	0.07318999999999999	0.965880935	-3.677094363	1.470520986	1.496874649	6.7617077860000006	2.171381551	7.58	1.3	1.93	5.01	-4.3	1.59	0.89
Ir3M-Bi-Ta	-1.085167	0.349817651	0.198580148	2.896966915	-0.753914871	2.464494848	2.117334815	7.89	0.32	1.5	4.86	2.0	1.62	1.34
Ir3M-Bi-W	-1.598682	0.448961486	-0.623657706	2.803950421	-0.51088707	2.4300497709999997	2.215499279	7.98	0.86	2.36	5.09	0.77	1.56	1.27
Ir3M-Bi-Re	-2.06549	0.568251057	-1.188741745	2.682267773	-0.33125602600000004	2.470737415	2.167982503	7.88	0.15	1.9	5.88	-0.51	1.52	1.2
Ir3M-Bi-Os	-2.096778	0.678344272	-1.590077704	2.553835141	-0.174162738	2.503867987	2.2	8.7	1.1	2.2	6.25	-1.5	1.49	1.13
Ir3M-Bi-Pt	-1.160582	0.8614112079999999	-2.682038096	2.156475689	0.413969564	3.038220012	2.207872028	9.0	2.13	2.28	6.74	-2.25	1.53	1.04
