# Supplementary material for: High-throughput screening of bimetallic catalysts enabled by machine learning
Source: Royal Society of Chemistry journal article supplement (doi:10.1039/c7ta01812f), 2017-01-01
Supplement: c7ta01812f4.csv [file c7ta01812f4.csv]

name	OH	filling	center	sigma_c	skewness	kurtosis	local_Pauling	IonizationPotential	ElectronAffinity	Pauling	WorkFunction	dBandCenter	AtomicRadius	OrbitalRadius
M-Ni-Cu	0.5025310000000001	0.866845025	-1.0582361359999999	1.2256079579999999	0.37087020200000004	5.860200899	1.9069944859999999	7.64	1.16	1.91	5.77	-1.29	1.38	0.71
M-Ni-Ru	0.148383	0.870556035	-1.180083304	1.210548241	0.343018922	5.964618415	1.992737811	7.64	1.16	1.91	5.77	-1.29	1.38	0.71
M-Ni-Rh	0.24558200000000002	0.862961577	-1.1968395729999999	1.219834316	0.279196388	6.020930014	2.014205656	7.64	1.16	1.91	5.77	-1.29	1.38	0.71
M-Ni-Pd	0.17663199999999998	0.866354788	-1.127358063	1.156319776	0.284750287	6.080364474	1.992737811	7.64	1.16	1.91	5.77	-1.29	1.38	0.71
M-Ni-W	0.032181	0.8769657590000001	-1.419479436	1.3645508709999998	0.9388405240000001	6.339224876	2.035152501	7.64	1.16	1.91	5.77	-1.29	1.38	0.71
M-Ni-Re	-0.00062	0.8745768509999999	-1.3027279459999999	1.340854816	0.43241485399999996	6.112107486	1.9069944859999999	7.64	1.16	1.91	5.77	-1.29	1.38	0.71
M-Ni-Ir	0.19278900000000002	0.864712906	-1.165495492	1.2654326999999999	-0.11765429	6.872548413	1.992737811	7.64	1.16	1.91	5.77	-1.29	1.38	0.71
M-Ni-Pt	0.12779000000000001	0.8710434159999999	-1.1752458209999999	1.251528675	-0.141375267	6.5305769	2.014205656	7.64	1.16	1.91	5.77	-1.29	1.38	0.71
M-Ni	0.513583	0.867716853	-1.4057900319999999	1.374056827	0.454568849	4.933961105	1.91	7.64	1.16	1.91	5.77	-1.29	1.38	0.71
M-Ru	0.277737	0.7051519559999999	-1.408756268	2.07756513	0.107570537	2.469496521	2.2	7.36	1.05	2.2	5.73	-1.41	1.48	1.05
M-Rh	0.553705	0.7909233459999999	-1.6955933419999998	1.876600066	0.26007318100000004	3.119721635	2.28	7.46	1.14	2.28	5.91	-1.73	1.49	0.99
M-Pd	0.9373459999999999	0.917306575	-1.7110530069999998	1.426094341	0.39040219	3.983247775	2.2	8.34	0.56	2.2	5.9	-1.83	1.52	0.94
M-Re	-0.041471	0.6061554929999999	-0.688847766	2.8451759219999997	0.011364061000000002	2.107986715	1.9	7.88	0.15	1.9	5.88	-0.51	1.52	1.2
M-Ir	0.6226520000000001	0.7728682790000001	-2.132659248	2.401270602	0.084761765	2.624798985	2.2	9.1	1.57	2.2	6.63	-2.11	1.5	1.08
M-Pt	0.973152	0.877249873	-2.1169479669999998	1.8979800759999998	0.20837684199999998	3.249394845	2.28	9.0	2.13	2.28	6.74	-2.25	1.53	1.04
M-Au	1.44096	0.968676482	-3.3299244519999998	1.452737489	1.015633156	6.881269606	2.54	9.23	2.31	2.54	6.01	-3.56	1.59	1.01
M-Cu-Ni	0.778271	0.9697250409999999	-2.387534456	1.148638055	0.947712856	7.624793025	1.90299449	7.73	1.24	1.9	5.3	-2.67	1.41	0.67
M-Cu-Ru	0.45447	0.97050704	-2.197331791	0.995456042	1.1766705179999999	9.989445629	1.985428835	7.73	1.24	1.9	5.3	-2.67	1.41	0.67
M-Au-Ru	1.485359	0.959346693	-3.808547618	1.835615684	0.784069727	4.744990112	2.4328224	9.23	2.31	2.54	6.01	-3.56	1.59	1.01
M-Au-Rh	1.593449	0.959370631	-3.684342108	1.831743669	0.7371629909999999	4.67173707	2.459031294	9.23	2.31	2.54	6.01	-3.56	1.59	1.01
M-Au-Pd	1.624388	0.964898733	-3.397581691	1.66532285	0.813645156	5.043149886	2.4328224	9.23	2.31	2.54	6.01	-3.56	1.59	1.01
M-Au-Ag	1.497362	0.968617475	-3.445471538	1.43725264	1.20075314	7.702455616	2.339110801	9.23	2.31	2.54	6.01	-3.56	1.59	1.01
M-Au-W	1.089212	0.95786199	-3.894957872	1.736058853	1.3698951240000001	6.505309061	2.484604129	9.23	2.31	2.54	6.01	-3.56	1.59	1.01
M-Au-Re	1.312816	0.960889309	-3.883491116	1.83908504	0.93003423	5.156064765	2.328143159	9.23	2.31	2.54	6.01	-3.56	1.59	1.01
M-Au-Ir	1.544618	0.959054704	-3.678456591	1.8195887380000002	0.6916414059999999	4.547751784	2.4328224	9.23	2.31	2.54	6.01	-3.56	1.59	1.01
M-Au-Pt	1.522363	0.9644228709999999	-3.377302357	1.67666174	0.803070277	5.109193084	2.459031294	9.23	2.31	2.54	6.01	-3.56	1.59	1.01
M-Pd-Cu	1.248033	0.9189852	-2.3539117640000002	1.821104281	0.340387909	3.281089258	2.105338619	8.34	0.56	2.2	5.9	-1.83	1.52	0.94
M-Pd-Ru	0.9195700000000001	0.917089292	-2.118855073	1.5764789819999998	0.469674088	3.684657637	2.2	8.34	0.56	2.2	5.9	-1.83	1.52	0.94
M-Pd-Rh	0.978979	0.918316275	-2.090893066	1.5750884369999998	0.427053985	3.791725893	2.223700689	8.34	0.56	2.2	5.9	-1.83	1.52	0.94
M-Pd-Ag	1.059059	0.930380807	-1.4439068380000002	1.247186083	0.208352622	5.958382321	2.115256651	8.34	0.56	2.2	5.9	-1.83	1.52	0.94
M-Pd-W	0.617374	0.9173648670000001	-2.554874087	1.658561582	1.007252263	4.903445023	2.24682619	8.34	0.56	2.2	5.9	-1.83	1.52	0.94
M-Pd-Re	0.707412	0.915782986	-2.363674485	1.686681739	0.589650934	3.998990149	2.105338619	8.34	0.56	2.2	5.9	-1.83	1.52	0.94
M-Pd-Ir	0.925376	0.9206629359999999	-2.196915815	1.624636938	0.279053745	3.9424726580000002	2.2	8.34	0.56	2.2	5.9	-1.83	1.52	0.94
M-Pd-Pt	0.915007	0.9148585459999999	-1.781912561	1.486097078	0.20032552	4.153883	2.223700689	8.34	0.56	2.2	5.9	-1.83	1.52	0.94
M-Pd-Au	0.916633	0.92886193	-1.4581091990000001	1.326671376	-0.040530337	5.442552309	2.296920647	8.34	0.56	2.2	5.9	-1.83	1.52	0.94
M-Pt-Cu	1.496852	0.8723660329999999	-2.60202812	2.415511291	0.200432902	2.761208714	2.1586412569999998	9.0	2.13	2.28	6.74	-2.25	1.53	1.04
M-Pt-Ru	1.065669	0.872598622	-2.460556325	2.0741403519999997	0.342065031	3.070153781	2.25569926	9.0	2.13	2.28	6.74	-2.25	1.53	1.04
M-Pt-Rh	1.137191	0.872152376	-2.419532377	2.070754906	0.30326435	3.10001472	2.28	9.0	2.13	2.28	6.74	-2.25	1.53	1.04
M-Pt-Pd	1.005361	0.87530344	-2.016570198	1.87542315	0.300490154	3.282096291	2.25569926	9.0	2.13	2.28	6.74	-2.25	1.53	1.04
M-Pt-Ag	1.209156	0.8852688479999999	-1.5740407859999999	1.597512285	0.222292958	4.200984836	2.1688103919999997	9.0	2.13	2.28	6.74	-2.25	1.53	1.04
M-Pt-W	0.6250979999999999	0.872566417	-2.748113905	2.1084517959999998	0.773645246	3.69350972	2.303710988	9.0	2.13	2.28	6.74	-2.25	1.53	1.04
M-Pt-Re	0.777414	0.87729637	-2.749695277	2.1595496240000003	0.473622631	3.207215355	2.1586412569999998	9.0	2.13	2.28	6.74	-2.25	1.53	1.04
M-Pt-Ir	1.0559180000000001	0.878098901	-2.529954085	2.088455751	0.252525545	3.1281862819999997	2.25569926	9.0	2.13	2.28	6.74	-2.25	1.53	1.04
M-Pt-Au	0.983081	0.882532225	-1.5885203669999999	1.6485119119999998	0.099651966	4.011627301	2.355073729	9.0	2.13	2.28	6.74	-2.25	1.53	1.04
M-Rh-Cu	0.683269	0.801283292	-1.7615431190000002	2.073841435	0.22343680300000002	2.7797432910000004	2.1586412569999998	7.46	1.14	2.28	5.91	-1.73	1.49	0.99
M-Rh-Ru	0.480993	0.790191135	-1.703406304	1.894038186	0.286064654	2.971491545	2.25569926	7.46	1.14	2.28	5.91	-1.73	1.49	0.99
M-Rh-Pd	0.500451	0.790118304	-1.446756674	1.7057882780000002	0.297613434	3.371170958	2.25569926	7.46	1.14	2.28	5.91	-1.73	1.49	0.99
M-Rh-Ag	0.384984	0.80389591	-1.046978493	1.4411910940000001	0.21436859	4.823315273	2.1688103919999997	7.46	1.14	2.28	5.91	-1.73	1.49	0.99
M-Rh-W	0.488414	0.8000629659999999	-1.855410905	1.9855177640000001	0.629165442	3.395271265	2.303710988	7.46	1.14	2.28	5.91	-1.73	1.49	0.99
M-Rh-Re	0.447032	0.794277281	-1.906588421	2.060648411	0.358664621	3.029484584	2.1586412569999998	7.46	1.14	2.28	5.91	-1.73	1.49	0.99
M-Rh-Ir	0.5249689999999999	0.7905516440000001	-1.7278283019999998	1.938099496	0.10345638800000001	3.252867326	2.25569926	7.46	1.14	2.28	5.91	-1.73	1.49	0.99
M-Rh-Pt	0.45841499999999996	0.790657505	-1.5089443619999998	1.778466137	0.088497384	3.552333017	2.28	7.46	1.14	2.28	5.91	-1.73	1.49	0.99
M-Rh-Au	0.324606	0.8046872009999999	-1.1343939170000001	1.522274352	-0.011877796999999999	4.621625188	2.355073729	7.46	1.14	2.28	5.91	-1.73	1.49	0.99
M-Ir-Cu	0.656196	0.777619152	-2.19568265	2.6288375459999997	0.12964221199999998	2.463258217	2.105338619	9.1	1.57	2.2	6.63	-2.11	1.5	1.08
M-Ir-Ru	0.580015	0.76861681	-2.069050411	2.365006146	0.206508967	2.5314034519999997	2.2	9.1	1.57	2.2	6.63	-2.11	1.5	1.08
M-Ir-Rh	0.63134	0.76542852	-2.057662739	2.353331228	0.181319502	2.604666447	2.223700689	9.1	1.57	2.2	6.63	-2.11	1.5	1.08
M-Ir-Pd	0.348501	0.7736113259999999	-1.790214459	2.119990295	0.17645433100000002	2.8020028810000004	2.2	9.1	1.57	2.2	6.63	-2.11	1.5	1.08
M-Ir-Ag	0.146727	0.781659408	-1.2468677670000001	1.772412035	0.084933009	3.56049652	2.115256651	9.1	1.57	2.2	6.63	-2.11	1.5	1.08
M-Ir-W	0.515204	0.775265746	-2.1463944390000003	2.361573012	0.48717235600000003	2.8329977000000004	2.24682619	9.1	1.57	2.2	6.63	-2.11	1.5	1.08
M-Ir-Re	0.530393	0.774317592	-2.2353797859999998	2.505910955	0.28553010300000004	2.553143033	2.105338619	9.1	1.57	2.2	6.63	-2.11	1.5	1.08
M-Ir-Pt	0.392613	0.76790373	-1.86412033	2.198937731	0.041759752000000004	2.800750616	2.223700689	9.1	1.57	2.2	6.63	-2.11	1.5	1.08
M-Ir-Au	0.05801799999999999	0.7770010829999999	-1.344036495	1.871552043	-0.071161526	3.455312623	2.296920647	9.1	1.57	2.2	6.63	-2.11	1.5	1.08
M-Re-Ru	-0.18667999999999998	0.574308668	-0.9312276420000001	2.75613121	-0.021611900000000003	2.094766819	1.985428835	7.88	0.15	1.9	5.88	-0.51	1.52	1.2
M-Re-W	-0.33825500000000003	0.594215548	-0.485242836	2.617164359	0.11706925900000001	2.21675972	2.027687956	7.88	0.15	1.9	5.88	-0.51	1.52	1.2
M-Re-Ir	-0.191538	0.575621832	-0.967175235	2.82512265	-0.160272779	2.260070136	1.985428835	7.88	0.15	1.9	5.88	-0.51	1.52	1.2
M-Re-Pt	-0.249437	0.575737705	-0.943664575	2.644841188	-0.22106258	2.431582131	2.00681794	7.88	0.15	1.9	5.88	-0.51	1.52	1.2
M-Co-Ni	0.40934499999999996	0.764968458	-1.407123495	1.696905118	0.331138579	3.291111651	1.888950184	7.88	0.66	1.88	5.76	-1.17	1.39	0.76
M-Ru-Rh	0.398962	0.7027776059999999	-1.392255456	2.062754696	0.080932091	2.590145843	2.223700689	7.36	1.05	2.2	5.73	-1.41	1.48	1.05
M-Ru-Pd	0.1747	0.689615572	-1.210983216	1.857442289	0.041799745	2.850627719	2.2	7.36	1.05	2.2	5.73	-1.41	1.48	1.05
M-Ru-Ag	-0.016474000000000003	0.713357679	-0.867884757	1.6313520780000001	0.008219568	3.7596619469999997	2.115256651	7.36	1.05	2.2	5.73	-1.41	1.48	1.05
M-Ru-W	0.476221	0.7205217909999999	-1.238157003	2.108453805	0.362928085	2.7814629589999997	2.24682619	7.36	1.05	2.2	5.73	-1.41	1.48	1.05
M-Ru-Re	0.45075299999999996	0.7207309140000001	-1.50047294	2.244796052	0.161184551	2.545244006	2.105338619	7.36	1.05	2.2	5.73	-1.41	1.48	1.05
M-Ru-Ir	0.338276	0.70102368	-1.375524276	2.135450081	-0.098971071	2.7801390919999998	2.2	7.36	1.05	2.2	5.73	-1.41	1.48	1.05
M-Ru-Pt	0.270276	0.699912572	-1.325796352	1.962953425	-0.155380023	3.062155031	2.223700689	7.36	1.05	2.2	5.73	-1.41	1.48	1.05
M-Ru-Au	-0.06051	0.7104454259999999	-0.9520822959999999	1.728208459	-0.209249856	3.729918842	2.296920647	7.36	1.05	2.2	5.73	-1.41	1.48	1.05
M-Cr-Ru	-0.68394	0.500219478	-0.023820386000000002	1.7167285369999998	-0.49292271600000004	3.2906442780000003	1.806352339	6.77	0.67	1.66	5.27	0.16	1.42	0.9
M-Cr-Ir	-0.606688	0.491904424	-0.139160955	1.8192799780000002	-0.827166585	4.280983414	1.806352339	6.77	0.67	1.66	5.27	0.16	1.42	0.9
M-Mo-Pd	-0.29136100000000004	0.492277054	-0.200417879	2.3182097759999998	-0.143019192	2.352983127	2.171923028	7.09	0.75	2.16	5.09	0.35	1.55	1.2
M-Mo-W	-1.473935	0.505113528	0.077870482	2.3042374430000003	0.047362712	2.213542431	2.21815161	7.09	0.75	2.16	5.09	0.35	1.55	1.2
M-Mo-Ir	-0.46896899999999997	0.500705644	-0.29553609	2.611348028	-0.256227211	2.356872036	2.171923028	7.09	0.75	2.16	5.09	0.35	1.55	1.2
M-Mo-Pt	-0.27870100000000003	0.49986817299999997	-0.287598183	2.463121213	-0.331457021	2.567788664	2.195321243	7.09	0.75	2.16	5.09	0.35	1.55	1.2
M-W-Pt	-0.412141	0.46762966799999994	-0.21129215699999998	2.760379354	-0.353182951	2.3988708080000003	2.335709656	7.98	0.86	2.36	5.09	0.77	1.56	1.27
M-W-Au	-1.0461120000000002	0.46255286	-0.021837077000000003	2.416438167	-0.423235384	3.009578631	2.412617741	7.98	0.86	2.36	5.09	0.77	1.56	1.27
M-Mn-Cu	-0.350107	0.561739106	-0.346572517	2.2890291680000003	0.148652233	2.152271292	1.647624605	7.43	0.0	1.55	5.45	0.07	1.43	0.86
M-Mn-Rh	-0.42978599999999995	0.567283109	-0.451009941	1.585266721	-0.326773026	4.162037118	1.740254009	7.43	0.0	1.55	5.45	0.07	1.43	0.86
M-Mn-Ag	-0.385022	0.547627312	-0.6285210960000001	2.2879876980000002	0.182539487	1.831480693	1.655386394	7.43	0.0	1.55	5.45	0.07	1.43	0.86
M-Mn-Ir	-0.435173	0.573054761	-0.462653704	1.665216975	-0.555484057	4.733610474	1.7217060000000002	7.43	0.0	1.55	5.45	0.07	1.43	0.86
M-Fe-Cu	0.076313	0.681567313	-1.013225889	1.88253586	0.263597984	2.6147309290000003	1.850724794	7.9	0.15	1.83	5.54	-0.92	1.41	0.8
M-Fe-Ru	-0.230291	0.6838462559999999	-0.98973232	1.850371849	0.21660657	2.399192723	1.93393809	7.9	0.15	1.83	5.54	-0.92	1.41	0.8
M-Fe-Rh	-0.18009	0.674415487	-1.017200547	1.882965024	0.216486768	2.411511991	1.9547724830000002	7.9	0.15	1.83	5.54	-0.92	1.41	0.8
M-Fe-Ag	-1.4370120000000002	0.6678108629999999	-1.1443943840000002	1.759850626	0.254346334	2.578693611	1.859443367	7.9	0.15	1.83	5.54	-0.92	1.41	0.8
M-Fe-W	-1.272316	0.7030622790000001	-0.899052289	1.7378064999999998	0.165471584	2.637906117	1.9751012490000002	7.9	0.15	1.83	5.54	-0.92	1.41	0.8
M-Fe-Ir	-0.18676199999999998	0.676135998	-1.024150846	1.906617176	0.10214450900000001	2.642900542	1.93393809	7.9	0.15	1.83	5.54	-0.92	1.41	0.8
M-Fe-Pt	-1.017603	0.6756387509999999	-1.1332210520000001	1.92376838	0.10071032699999999	2.465695499	1.9547724830000002	7.9	0.15	1.83	5.54	-0.92	1.41	0.8
M-Os-Cu	-0.761202	0.6871654340000001	-1.7705036840000001	2.778754927	0.10405006300000001	2.3000256930000003	2.105338619	8.7	1.1	2.2	6.25	-1.5	1.49	1.13
M-Os-Ru	0.08441	0.673926354	-1.6120872640000001	2.585487126	0.08369686400000001	2.2283442019999997	2.2	8.7	1.1	2.2	6.25	-1.5	1.49	1.13
M-Os-Rh	0.169903	0.675083115	-1.603283267	2.572024536	0.063717064	2.307617944	2.223700689	8.7	1.1	2.2	6.25	-1.5	1.49	1.13
M-Os-Pd	-0.367508	0.668174568	-1.403661672	2.324199587	0.030575066	2.479142772	2.2	8.7	1.1	2.2	6.25	-1.5	1.49	1.13
M-Os-Ag	-1.259767	0.678026004	-0.945296515	1.914993514	-0.05251845	3.286978074	2.115256651	8.7	1.1	2.2	6.25	-1.5	1.49	1.13
M-Os-W	0.251784	0.6894729190000001	-1.277794881	2.5119413109999997	0.270598348	2.395782056	2.24682619	8.7	1.1	2.2	6.25	-1.5	1.49	1.13
M-Os-Re	0.256797	0.690761469	-1.67397535	2.738179847	0.138288845	2.23652403	2.105338619	8.7	1.1	2.2	6.25	-1.5	1.49	1.13
M-Os-Ir	0.208986	0.678258425	-1.6191228780000002	2.63875719	-0.052565812	2.3706941230000003	2.2	8.7	1.1	2.2	6.25	-1.5	1.49	1.13
M-Os-Pt	-0.137479	0.670704188	-1.5087685	2.435542034	-0.118856376	2.5389844790000002	2.223700689	8.7	1.1	2.2	6.25	-1.5	1.49	1.13
M-Os-Au	-1.3583129999999999	0.6760908609999999	-1.0926210140000001	2.054444498	-0.25887306	3.254590559	2.296920647	8.7	1.1	2.2	6.25	-1.5	1.49	1.13
M-V-Rh	-1.192037	0.391825405	0.400788831	1.866188442	-0.5066158	3.141595498	1.802651512	6.75	0.53	1.63	4.88	1.06	1.49	0.98
M-V-Pd	-1.150719	0.37972812899999997	0.387099115	1.728802947	-0.61226345	3.793544655	1.783438457	6.75	0.53	1.63	4.88	1.06	1.49	0.98
M-V-Ir	-1.2039520000000001	0.395027167	0.366266637	1.933623916	-0.7156638909999999	3.715567651	1.783438457	6.75	0.53	1.63	4.88	1.06	1.49	0.98
M-V-Pt	-1.302223	0.38220104899999996	0.318737007	1.8596174090000002	-0.8583705970000001	4.300834898	1.802651512	6.75	0.53	1.63	4.88	1.06	1.49	0.98
M-Ta-Ag	-1.205211	0.3681353	0.558157739	2.313474839	-0.38300535399999996	2.711125312	1.6178232559999999	7.89	0.32	1.5	4.86	2.0	1.62	1.34
M-Ta-Au	-1.086108	0.367254236	0.515671117	2.497498834	-0.579232381	2.97682502	1.7567663180000002	7.89	0.32	1.5	4.86	2.0	1.62	1.34
Cu-M-Cu-Ni	0.684823	0.970837265	-2.21071291	1.0658574440000002	1.132428983	8.566567233999999	1.90299449	7.73	1.24	1.9	5.3	-2.67	1.41	0.67
Cu-M-Cu-Pt	0.803773	0.972706396	-2.095402233	1.0862212409999998	0.369807926	8.744596768	2.00681794	7.73	1.24	1.9	5.3	-2.67	1.41	0.67
Au-M-Au-Ti	1.116918	0.9642796779999999	-4.069398183000001	1.548769061	1.8795706509999999	8.608343413	2.185947956	9.23	2.31	2.54	6.01	-3.56	1.59	1.01
Au-M-Au-Mn	1.1636	0.959364508	-3.845074559	1.5602122059999999	1.642279887	7.945790859	2.190196654	9.23	2.31	2.54	6.01	-3.56	1.59	1.01
Au-M-Au-Co	0.983016	0.963341769	-3.6449383739999996	1.5327315259999998	1.4798369009999999	7.320931617	2.3207638790000003	9.23	2.31	2.54	6.01	-3.56	1.59	1.01
Au-M-Au-Ni	1.297267	0.963506972	-3.428840025	1.5184393809999999	1.4651308180000002	7.210309777000001	2.331812423	9.23	2.31	2.54	6.01	-3.56	1.59	1.01
Au-M-Au-Cu	1.406875	0.965712267	-3.639687777	1.514865792	1.400021187	7.348126541	2.328143159	9.23	2.31	2.54	6.01	-3.56	1.59	1.01
Au-M-Au-Zn	1.291393	0.970927509	-3.8910091089999996	1.496743325	1.103055871	8.073088037	2.231663883	9.23	2.31	2.54	6.01	-3.56	1.59	1.01
Au-M-Au-Ga	1.355127	0.963269444	-3.646476859	1.542312404	1.260730517	8.468739646	2.294495309	9.23	2.31	2.54	6.01	-3.56	1.59	1.01
Au-M-Au-Zr	1.096008	0.960226835	-3.987951503	1.5965181480000001	1.985452685	9.139432477	2.091891205	9.23	2.31	2.54	6.01	-3.56	1.59	1.01
Au-M-Au-Nb	0.813513	0.959178896	-4.014693721	1.614358212	1.7885907419999998	7.97512474	2.2111570830000002	9.23	2.31	2.54	6.01	-3.56	1.59	1.01
Au-M-Au-Mo	0.5997020000000001	0.959451775	-3.9177363410000003	1.595611671	1.592444285	7.145661465	2.419467134	9.23	2.31	2.54	6.01	-3.56	1.59	1.01
Au-M-Au-Ru	1.105608	0.963463353	-3.420404501	1.516244177	1.312947712	6.40442695	2.4328224	9.23	2.31	2.54	6.01	-3.56	1.59	1.01
Au-M-Au-Rh	1.313433	0.963726313	-3.181265839	1.4957342530000002	1.2474244829999999	6.293143957000001	2.459031294	9.23	2.31	2.54	6.01	-3.56	1.59	1.01
Au-M-Au-Ag	1.422489	0.9687150720000001	-3.4215455919999997	1.4143024480000002	1.231106106	7.867426292	2.339110801	9.23	2.31	2.54	6.01	-3.56	1.59	1.01
Au-M-Au-Ta	0.77891	0.956913073	-4.091255136	1.6893149619999999	1.7684587330000001	7.796071813999999	2.168757427	9.23	2.31	2.54	6.01	-3.56	1.59	1.01
Au-M-Au-W	0.725242	0.957510393	-4.037370415	1.682851146	1.566910763	6.953686222999999	2.484604129	9.23	2.31	2.54	6.01	-3.56	1.59	1.01
Au-M-Au-Re	0.418405	0.957370065	-3.8357000360000004	1.6796811759999999	1.332700607	6.036210013	2.328143159	9.23	2.31	2.54	6.01	-3.56	1.59	1.01
Au-M-Au-Os	0.677892	0.9585739870000001	-3.614705184	1.655586157	1.171680582	5.6006966060000005	2.4328224	9.23	2.31	2.54	6.01	-3.56	1.59	1.01
Au-M-Au-Ir	1.211363	0.96321563	-3.2718144689999997	1.571753725	1.092973189	5.710696966	2.4328224	9.23	2.31	2.54	6.01	-3.56	1.59	1.01
Au-M-Au-Pt	1.388692	0.9666413359999999	-3.079319042	1.501225911	1.022051292	5.887914151	2.459031294	9.23	2.31	2.54	6.01	-3.56	1.59	1.01
Pt-M-Pt-Sc	1.1884709999999998	0.887332858	-2.671204559	1.9720278919999998	1.0043869029999999	4.454389966	1.952612501	9.0	2.13	2.28	6.74	-2.25	1.53	1.04
Pt-M-Pt-Ti	1.070128	0.889344516	-2.823090615	1.990453663	0.92001772	4.069095648	2.026798663	9.0	2.13	2.28	6.74	-2.25	1.53	1.04
Pt-M-Pt-V	0.880091	0.874690064	-2.8056117830000002	2.018763938	0.784680154	3.619322227	2.061629758	9.0	2.13	2.28	6.74	-2.25	1.53	1.04
Pt-M-Pt-Cr	0.44903999999999994	0.880720837	-2.697672155	2.0009408019999997	0.713268108	3.5942229169999997	2.072940417	9.0	2.13	2.28	6.74	-2.25	1.53	1.04
Pt-M-Pt-Co	1.123577	0.878742853	-2.388466582	1.906120408	0.5112326189999999	3.501053031	2.15179923	9.0	2.13	2.28	6.74	-2.25	1.53	1.04
Pt-M-Pt-Ni	1.163932	0.8794987009999999	-2.282454765	1.8966792769999998	0.501348302	3.493407229	2.162043378	9.0	2.13	2.28	6.74	-2.25	1.53	1.04
Pt-M-Pt-Cu	1.288558	0.881787586	-2.034902404	1.865579537	0.38974635700000004	3.429734318	2.1586412569999998	9.0	2.13	2.28	6.74	-2.25	1.53	1.04
Pt-M-Pt-Y	1.559089	0.8847394690000001	-2.383708349	1.8599318880000002	0.855500855	4.378786143999999	1.890002341	9.0	2.13	2.28	6.74	-2.25	1.53	1.04
Pt-M-Pt-Zr	1.297735	0.884033746	-2.630025362	1.9733282909999998	0.9229781440000001	4.317695521	1.939589772	9.0	2.13	2.28	6.74	-2.25	1.53	1.04
Pt-M-Pt-Nb	0.993091	0.880617848	-2.747025825	2.044424754	0.850126485	3.928783293	2.050172424	9.0	2.13	2.28	6.74	-2.25	1.53	1.04
Pt-M-Pt-Mo	0.8705959999999999	0.8736080509999999	-2.682044989	2.02531532	0.6927789240000001	3.550061085	2.243316333	9.0	2.13	2.28	6.74	-2.25	1.53	1.04
Pt-M-Pt-Ru	0.881776	0.874957462	-2.416849692	1.9323878019999998	0.44049720600000003	3.2948803160000004	2.25569926	9.0	2.13	2.28	6.74	-2.25	1.53	1.04
Pt-M-Pt-Rh	0.9804959999999999	0.872095499	-2.279423625	1.915094368	0.395119899	3.3058098639999995	2.28	9.0	2.13	2.28	6.74	-2.25	1.53	1.04
Pt-M-Pt-Pd	1.031016	0.87699701	-1.988884825	1.8234083330000002	0.317361758	3.359763627	2.25569926	9.0	2.13	2.28	6.74	-2.25	1.53	1.04
Pt-M-Pt-Ag	1.2777049999999999	0.8780293309999999	-1.7486821190000001	1.781533025	0.18598671	3.5449529660000003	2.1688103919999997	9.0	2.13	2.28	6.74	-2.25	1.53	1.04
Pt-M-Pt-Ta	0.8906860000000001	0.873709795	-2.796791783	2.1192861030000003	0.8361206520000001	3.876242351	2.0108597009999998	9.0	2.13	2.28	6.74	-2.25	1.53	1.04
Pt-M-Pt-W	0.786914	0.87457943	-2.8182772060000003	2.134697235	0.711268435	3.602842883	2.303710988	9.0	2.13	2.28	6.74	-2.25	1.53	1.04
Pt-M-Pt-Re	0.628129	0.873880558	-2.7158087689999997	2.105950009	0.51444377	3.272314942	2.1586412569999998	9.0	2.13	2.28	6.74	-2.25	1.53	1.04
Pt-M-Pt-Os	0.689617	0.874819302	-2.595754507	2.057533526	0.37167417700000005	3.1672090460000004	2.25569926	9.0	2.13	2.28	6.74	-2.25	1.53	1.04
Pt-M-Pt-Ir	0.8801329999999999	0.873547972	-2.433655996	2.01247543	0.27430120399999997	3.1824519639999997	2.25569926	9.0	2.13	2.28	6.74	-2.25	1.53	1.04
Pt-M-Pt-Au	1.116027	0.8799302	-1.850864183	1.826204395	0.08626699199999999	3.424493001	2.355073729	9.0	2.13	2.28	6.74	-2.25	1.53	1.04
Pd-M-Pd-Ti	0.981554	0.922739833	-2.564267101	1.561574165	1.193481733	5.165323494	1.976751572	8.34	0.56	2.2	5.9	-1.83	1.52	0.94
Pd-M-Pd-V	0.8629379999999999	0.915035898	-2.591619545	1.597598654	1.049632634	4.614176068	2.010722593	8.34	0.56	2.2	5.9	-1.83	1.52	0.94
Pd-M-Pd-Co	1.018117	0.9201924140000001	-2.158040426	1.509063131	0.6744423340000001	4.361195152	2.098665539	8.34	0.56	2.2	5.9	-1.83	1.52	0.94
Pd-M-Pd-Ni	1.072025	0.919277757	-1.988019881	1.4912597140000001	0.659383685	4.322634594	2.108656732	8.34	0.56	2.2	5.9	-1.83	1.52	0.94
Pd-M-Pd-Cu	1.195662	0.9229777790000001	-1.742842651	1.4544438919999998	0.540186402	4.282721801	2.105338619	8.34	0.56	2.2	5.9	-1.83	1.52	0.94
Pd-M-Pd-Y	1.4807540000000001	0.923394497	-2.1999911880000003	1.4522658590000002	1.2115003579999999	5.845340577999999	1.843333118	8.34	0.56	2.2	5.9	-1.83	1.52	0.94
Pd-M-Pd-Zr	1.154787	0.920401403	-2.388929644	1.565084761	1.249585206	5.721240021	1.8916961019999998	8.34	0.56	2.2	5.9	-1.83	1.52	0.94
Pd-M-Pd-Nb	0.875756	0.9180247890000001	-2.507806344	1.621002312	1.077438956	4.896078298	1.999548172	8.34	0.56	2.2	5.9	-1.83	1.52	0.94
Pd-M-Pd-Mo	0.774282	0.916635875	-2.418813685	1.603857616	0.858023506	4.275912022	2.18792284	8.34	0.56	2.2	5.9	-1.83	1.52	0.94
Pd-M-Pd-Ru	0.840058	0.9148028640000001	-2.127336009	1.531920259	0.5260170239999999	3.85124121	2.2	8.34	0.56	2.2	5.9	-1.83	1.52	0.94
Pd-M-Pd-Rh	0.926235	0.915454118	-1.9675259319999998	1.4971415719999999	0.495433161	3.9929440339999998	2.223700689	8.34	0.56	2.2	5.9	-1.83	1.52	0.94
Pd-M-Pd-Ag	1.227099	0.9234882729999999	-1.591544443	1.4037404359999999	0.229305848	4.5945550189999995	2.115256651	8.34	0.56	2.2	5.9	-1.83	1.52	0.94
Pd-M-Pd-Ta	0.811767	0.916512677	-2.600474067	1.69065231	1.070714948	4.989575079	1.961206185	8.34	0.56	2.2	5.9	-1.83	1.52	0.94
Pd-M-Pd-W	0.693322	0.91616129	-2.551172435	1.692883911	0.83843361	4.342838562	2.24682619	8.34	0.56	2.2	5.9	-1.83	1.52	0.94
Pd-M-Pd-Re	0.6482399999999999	0.9178361859999999	-2.455038777	1.6872165780000001	0.593357049	3.8862300339999996	2.105338619	8.34	0.56	2.2	5.9	-1.83	1.52	0.94
Pd-M-Pd-Os	0.668473	0.9137105879999999	-2.307671939	1.6610005819999998	0.398295368	3.76175748	2.2	8.34	0.56	2.2	5.9	-1.83	1.52	0.94
Pd-M-Pd-Ir	0.800351	0.9161486109999999	-2.142001642	1.599590106	0.28999536600000003	3.8913336000000003	2.2	8.34	0.56	2.2	5.9	-1.83	1.52	0.94
Pd-M-Pd-Pt	0.902149	0.9213774859999999	-1.8694511619999998	1.512013705	0.20665747	4.002521055	2.223700689	8.34	0.56	2.2	5.9	-1.83	1.52	0.94
Pd-M-Pd-Au	1.079975	0.9249082820000001	-1.6495198359999999	1.450175021	0.058624814000000004	4.468976586	2.296920647	8.34	0.56	2.2	5.9	-1.83	1.52	0.94
Ni-M-Ni-Ti	0.592385	0.876104393	-1.453256879	1.36249966	0.9559792579999999	5.58452183	1.790521636	7.64	1.16	1.91	5.77	-1.29	1.38	0.71
Ni-M-Ni-V	0.35927800000000004	0.8723539109999999	-1.591291895	1.4165732469999999	0.841860475	5.17205151	1.821292245	7.64	1.16	1.91	5.77	-1.29	1.38	0.71
Ni-M-Ni-Cr	0.309869	0.8686144570000001	-1.5756881580000002	1.401397715	0.6737802079999999	4.900587582	1.831284348	7.64	1.16	1.91	5.77	-1.29	1.38	0.71
Ni-M-Ni-Fe	0.583043	0.8691337790000001	-1.4237201380000002	1.38205788	0.56337847	5.044497906	1.8856395730000002	7.64	1.16	1.91	5.77	-1.29	1.38	0.71
Ni-M-Ni-Co	0.477354	0.868437604	-1.531884557	1.399576933	0.497164129	4.931796439	1.9009500780000002	7.64	1.16	1.91	5.77	-1.29	1.38	0.71
Ni-M-Ni-Cu	0.6016560000000001	0.875664845	-1.142883571	1.298632465	0.301462998	5.405059994	1.9069944859999999	7.64	1.16	1.91	5.77	-1.29	1.38	0.71
Ni-M-Ni-Zn	0.6337649999999999	0.8802303509999999	-1.269751798	1.338555948	0.032274909	7.959578283	1.827967796	7.64	1.16	1.91	5.77	-1.29	1.38	0.71
Ni-M-Ni-Nb	0.45015900000000003	0.8688869929999999	-1.341338801	1.3725667680000002	0.785731104	5.72609067	1.8111705669999998	7.64	1.16	1.91	5.77	-1.29	1.38	0.71
Ni-M-Ni-Rh	0.306419	0.867470016	-1.389012326	1.38825194	0.26500495399999996	5.237230356	2.014205656	7.64	1.16	1.91	5.77	-1.29	1.38	0.71
Ni-M-Ni-Pd	0.480375	0.8657945109999999	-1.2781206	1.336267082	0.248583382	5.376529733	1.992737811	7.64	1.16	1.91	5.77	-1.29	1.38	0.71
Ni-M-Ni-Ta	0.369256	0.871145046	-1.441013739	1.414628349	0.7397433720000001	5.7016669339999995	1.7764407819999999	7.64	1.16	1.91	5.77	-1.29	1.38	0.71
Rh-M-Rh-Ti	0.9096799999999999	0.810123803	-1.7411732469999999	1.960724677	0.7053749429999999	3.2502205330000002	2.026798663	7.46	1.14	2.28	5.91	-1.73	1.49	0.99
Rh-M-Rh-V	0.769617	0.794712291	-1.8126448030000002	1.99379682	0.607667465	3.014313535	2.061629758	7.46	1.14	2.28	5.91	-1.73	1.49	0.99
Rh-M-Rh-Cr	0.5859949999999999	0.791451868	-1.930027245	1.991882324	0.538057616	2.9427110260000005	2.072940417	7.46	1.14	2.28	5.91	-1.73	1.49	0.99
Rh-M-Rh-Fe	0.722659	0.798377468	-1.515103735	1.84925361	0.40138033100000003	3.167539905	2.134468352	7.46	1.14	2.28	5.91	-1.73	1.49	0.99
Rh-M-Rh-Co	0.700803	0.795793726	-1.631267627	1.890222738	0.383391198	3.1134374310000004	2.15179923	7.46	1.14	2.28	5.91	-1.73	1.49	0.99
Rh-M-Rh-Ni	0.681815	0.7923401520000001	-1.608584993	1.86210513	0.391385295	3.1567037819999997	2.162043378	7.46	1.14	2.28	5.91	-1.73	1.49	0.99
Rh-M-Rh-Cu	0.646328	0.797857429	-1.433581948	1.798407045	0.320202783	3.2797587960000003	2.1586412569999998	7.46	1.14	2.28	5.91	-1.73	1.49	0.99
Rh-M-Rh-Zn	0.9780260000000001	0.8263461129999999	-1.53130537	1.837032051	0.067210326	3.9694669589999996	2.069186214	7.46	1.14	2.28	5.91	-1.73	1.49	0.99
Rh-M-Rh-Ga	1.0073809999999999	0.8101191	-1.7085561930000002	2.017611519	0.018715378	4.745426641	2.1274431590000003	7.46	1.14	2.28	5.91	-1.73	1.49	0.99
Rh-M-Rh-Nb	0.916575	0.8037206240000001	-1.697788712	1.985340081	0.623350006	3.2494446439999995	2.050172424	7.46	1.14	2.28	5.91	-1.73	1.49	0.99
Rh-M-Rh-Mo	0.682064	0.790983621	-1.7904331969999998	2.006558545	0.48129596	2.9569104680000002	2.243316333	7.46	1.14	2.28	5.91	-1.73	1.49	0.99
Rh-M-Rh-Ru	0.50551	0.786234271	-1.716020487	1.9153569769999998	0.289684327	2.994031937	2.25569926	7.46	1.14	2.28	5.91	-1.73	1.49	0.99
Rh-M-Rh-Pd	0.499072	0.794966068	-1.529294798	1.798281483	0.245312721	3.236421268	2.25569926	7.46	1.14	2.28	5.91	-1.73	1.49	0.99
Rh-M-Rh-Ag	0.519794	0.78846455	-1.2880833790000001	1.730709885	0.165278584	3.541283092	2.1688103919999997	7.46	1.14	2.28	5.91	-1.73	1.49	0.99
Rh-M-Rh-In	0.8180689999999999	0.811732509	-1.584951369	1.8802479619999999	0.069052791	4.801125745	2.116802762	7.46	1.14	2.28	5.91	-1.73	1.49	0.99
Rh-M-Rh-Ta	0.9026299999999999	0.800521371	-1.714999581	2.037092596	0.60474733	3.28976507	2.0108597009999998	7.46	1.14	2.28	5.91	-1.73	1.49	0.99
Rh-M-Rh-W	0.665111	0.792234668	-1.8603653359999999	2.090825983	0.467945703	3.028165885	2.303710988	7.46	1.14	2.28	5.91	-1.73	1.49	0.99
Rh-M-Rh-Re	0.536503	0.795900339	-1.986090779	2.1012352869999997	0.321986325	2.907446999	2.1586412569999998	7.46	1.14	2.28	5.91	-1.73	1.49	0.99
Rh-M-Rh-Os	0.39821100000000004	0.7927496	-1.9063158119999999	2.0530094930000002	0.19099238600000001	2.9755986119999998	2.25569926	7.46	1.14	2.28	5.91	-1.73	1.49	0.99
Rh-M-Rh-Ir	0.46538500000000005	0.796345283	-1.827017504	1.977847881	0.105859144	3.1422871860000003	2.25569926	7.46	1.14	2.28	5.91	-1.73	1.49	0.99
Rh-M-Rh-Pt	0.470394	0.7897964279999999	-1.593814076	1.87512711	0.058788695	3.3155292239999996	2.28	7.46	1.14	2.28	5.91	-1.73	1.49	0.99
Rh-M-Rh-Au	0.44749399999999995	0.798651088	-1.4107527290000001	1.779261941	0.043441583	3.573566475	2.355073729	7.46	1.14	2.28	5.91	-1.73	1.49	0.99
Ir-M-Ir-Ti	0.889481	0.7909689870000001	-1.95523802	2.35989534	0.5170900829999999	2.8385035210000003	1.976751572	9.1	1.57	2.2	6.63	-2.11	1.5	1.08
Ir-M-Ir-V	0.833952	0.77685954	-2.068625338	2.389982397	0.449626531	2.65611243	2.010722593	9.1	1.57	2.2	6.63	-2.11	1.5	1.08
Ir-M-Ir-Cr	0.64748	0.770433583	-2.1401042340000003	2.379993935	0.39348467600000003	2.595957596	2.021753963	9.1	1.57	2.2	6.63	-2.11	1.5	1.08
Ir-M-Ir-Mn	1.453544	0.77098838	-2.004364882	2.350609761	0.351672098	2.678486756	1.980593667	9.1	1.57	2.2	6.63	-2.11	1.5	1.08
Ir-M-Ir-Fe	0.7433529999999999	0.779638123	-1.893403184	2.260732035	0.291180895	2.750033005	2.081762607	9.1	1.57	2.2	6.63	-2.11	1.5	1.08
Ir-M-Ir-Co	0.707737	0.775705449	-1.947246239	2.2844862519999998	0.275857902	2.698989521	2.098665539	9.1	1.57	2.2	6.63	-2.11	1.5	1.08
Ir-M-Ir-Ni	0.75643	0.7738712390000001	-1.935979921	2.261314937	0.279695929	2.739591182	2.108656732	9.1	1.57	2.2	6.63	-2.11	1.5	1.08
Ir-M-Ir-Cu	0.700286	0.780303825	-1.766685241	2.2158923280000002	0.194624078	2.790609763	2.105338619	9.1	1.57	2.2	6.63	-2.11	1.5	1.08
Ir-M-Ir-Zn	1.071955	0.7961880090000001	-1.7701762890000001	2.2330976369999997	0.07231804	3.181011862	2.01809246	9.1	1.57	2.2	6.63	-2.11	1.5	1.08
Ir-M-Ir-Ga	1.073901	0.7917582540000001	-1.983685441	2.392053635	0.029434078	3.438255298	2.074910885	9.1	1.57	2.2	6.63	-2.11	1.5	1.08
Ir-M-Ir-Zr	1.103488	0.7894740020000001	-1.7390341280000001	2.253029262	0.43111561	2.92867567	1.8916961019999998	9.1	1.57	2.2	6.63	-2.11	1.5	1.08
Ir-M-Ir-Nb	0.948542	0.780364342	-1.86654655	2.374613129	0.43906788	2.774868285	1.999548172	9.1	1.57	2.2	6.63	-2.11	1.5	1.08
Ir-M-Ir-Mo	0.780546	0.772118273	-2.043806495	2.405659108	0.37002406200000004	2.6151157069999997	2.18792284	9.1	1.57	2.2	6.63	-2.11	1.5	1.08
Ir-M-Ir-Ru	0.646247	0.7617009159999999	-1.9655837680000001	2.323765295	0.20364751899999997	2.562123042	2.2	9.1	1.57	2.2	6.63	-2.11	1.5	1.08
Ir-M-Ir-Rh	0.6900390000000001	0.7738004820000001	-2.022857262	2.295786836	0.18703636199999998	2.667664734	2.223700689	9.1	1.57	2.2	6.63	-2.11	1.5	1.08
Ir-M-Ir-Pd	0.5334369999999999	0.771084069	-1.815737711	2.209335581	0.140376878	2.74656985	2.2	9.1	1.57	2.2	6.63	-2.11	1.5	1.08
Ir-M-Ir-Ag	0.571626	0.7856781429999999	-1.643273126	2.136404024	0.077121224	2.934356885	2.115256651	9.1	1.57	2.2	6.63	-2.11	1.5	1.08
Ir-M-Ir-In	0.856351	0.79248891	-1.88555971	2.244369022	0.079694803	3.3843014080000002	2.0645332290000002	9.1	1.57	2.2	6.63	-2.11	1.5	1.08
Ir-M-Ir-Sn	0.47601800000000005	0.796661356	-2.093612673	2.388277414	-0.050948607	3.596520876	2.125067346	9.1	1.57	2.2	6.63	-2.11	1.5	1.08
Ir-M-Ir-Ta	0.953674	0.780926663	-1.934540529	2.433159851	0.447078509	2.807582392	1.961206185	9.1	1.57	2.2	6.63	-2.11	1.5	1.08
Ir-M-Ir-W	0.766129	0.773979385	-2.131834618	2.500347331	0.372740099	2.6262577680000003	2.24682619	9.1	1.57	2.2	6.63	-2.11	1.5	1.08
Ir-M-Ir-Re	0.6650119999999999	0.771994066	-2.1738621069999997	2.505362496	0.261221301	2.54301245	2.105338619	9.1	1.57	2.2	6.63	-2.11	1.5	1.08
Ir-M-Ir-Os	0.5579609999999999	0.768014416	-2.1445940080000003	2.472220134	0.151768501	2.5282749840000003	2.2	9.1	1.57	2.2	6.63	-2.11	1.5	1.08
Ir-M-Ir-Pt	0.500365	0.768904423	-1.929956997	2.3080711	0.028101551000000002	2.717129256	2.223700689	9.1	1.57	2.2	6.63	-2.11	1.5	1.08
Ir-M-Ir-Au	0.42795	0.78113693	-1.7102343919999998	2.185508028	-0.022449675	2.8899428339999997	2.296920647	9.1	1.57	2.2	6.63	-2.11	1.5	1.08
Re-M-Re-Mn	-0.088172	0.582803411	-0.7964073759999999	2.66843642	0.09662507699999999	2.086211627	1.7874217159999999	7.88	0.15	1.9	5.88	-0.51	1.52	1.2
Re-M-Re-Ru	-0.153321	0.577270183	-0.9083003479999999	2.7004918769999997	-0.020500616	2.120289353	1.985428835	7.88	0.15	1.9	5.88	-0.51	1.52	1.2
Re-M-Re-Os	-0.084703	0.5894547410000001	-1.042366188	2.870830733	-0.067010368	2.1535061630000003	1.985428835	7.88	0.15	1.9	5.88	-0.51	1.52	1.2
Ru-M-Ru-Cr	0.573951	0.734828315	-1.462653762	2.078895891	0.23392112899999998	2.190906926	2.021753963	7.36	1.05	2.2	5.73	-1.41	1.48	1.05
Ru-M-Ru-Fe	0.40366799999999997	0.7207569490000001	-1.2947740620000001	1.9885538930000002	0.232922682	2.59806888	2.081762607	7.36	1.05	2.2	5.73	-1.41	1.48	1.05
Ru-M-Ru-Co	0.3473	0.714282374	-1.32557495	2.029016024	0.21133965100000002	2.59253235	2.098665539	7.36	1.05	2.2	5.73	-1.41	1.48	1.05
Ru-M-Ru-Ni	0.30906100000000003	0.709510547	-1.309519026	1.986679729	0.22478087600000002	2.668393173	2.108656732	7.36	1.05	2.2	5.73	-1.41	1.48	1.05
Ru-M-Ru-Cu	0.09025	0.7144735609999999	-1.167123512	1.945451751	0.164963939	2.8137836569999997	2.105338619	7.36	1.05	2.2	5.73	-1.41	1.48	1.05
Ru-M-Ru-Zn	0.27871	0.731829793	-1.18695133	1.961883171	-0.039369552	3.475765958	2.01809246	7.36	1.05	2.2	5.73	-1.41	1.48	1.05
Ru-M-Ru-Ga	0.564678	0.7356918570000001	-1.243773929	2.143890647	-0.22378360100000003	4.5136800919999995	2.074910885	7.36	1.05	2.2	5.73	-1.41	1.48	1.05
Ru-M-Ru-Zr	-0.21375100000000002	0.719594988	-1.0281155659999999	1.9423319190000001	0.42043106700000005	2.7675864619999997	1.8916961019999998	7.36	1.05	2.2	5.73	-1.41	1.48	1.05
Ru-M-Ru-Nb	0.34579899999999997	0.728192562	-1.063838024	2.065079071	0.35454888	2.573258025	1.999548172	7.36	1.05	2.2	5.73	-1.41	1.48	1.05
Ru-M-Ru-Mo	0.672074	0.72399971	-1.187075467	2.152596696	0.241472507	2.364638589	2.18792284	7.36	1.05	2.2	5.73	-1.41	1.48	1.05
Ru-M-Ru-Rh	0.317844	0.716147649	-1.3948845380000001	2.029952516	0.08168517900000001	2.599588395	2.223700689	7.36	1.05	2.2	5.73	-1.41	1.48	1.05
Ru-M-Ru-Pd	0.125782	0.710297615	-1.288689015	1.946368047	0.049727727	2.7598145439999997	2.2	7.36	1.05	2.2	5.73	-1.41	1.48	1.05
Ru-M-Ru-Ag	-0.08621799999999999	0.711942636	-1.0975676109999999	1.9059929930000001	0.040037907000000005	3.050098534	2.115256651	7.36	1.05	2.2	5.73	-1.41	1.48	1.05
Ru-M-Ru-In	0.374399	0.7301236320000001	-1.213390607	2.017927004	-0.204260997	4.775580556	2.0645332290000002	7.36	1.05	2.2	5.73	-1.41	1.48	1.05
Ru-M-Ru-Sn	0.48058599999999996	0.731332072	-1.346839347	2.182061176	-0.31574703600000004	4.459871512	2.125067346	7.36	1.05	2.2	5.73	-1.41	1.48	1.05
Ru-M-Ru-Ta	0.324719	0.7321758279999999	-1.10408916	2.1277381440000003	0.35091292399999996	2.662932442	1.961206185	7.36	1.05	2.2	5.73	-1.41	1.48	1.05
Ru-M-Ru-W	0.668024	0.734165062	-1.223239851	2.239855674	0.255345155	2.5123775740000003	2.24682619	7.36	1.05	2.2	5.73	-1.41	1.48	1.05
Ru-M-Ru-Os	0.275899	0.7211090029999999	-1.533173989	2.230557845	0.000851871	2.518747635	2.2	7.36	1.05	2.2	5.73	-1.41	1.48	1.05
Ru-M-Ru-Ir	0.30499699999999996	0.7113405970000001	-1.421144934	2.143146765	-0.09181417	2.711083214	2.2	7.36	1.05	2.2	5.73	-1.41	1.48	1.05
Ru-M-Ru-Pt	0.234915	0.7087633390000001	-1.3566869819999998	2.060549385	-0.128917518	2.916962805	2.223700689	7.36	1.05	2.2	5.73	-1.41	1.48	1.05
Ru-M-Ru-Au	-0.048119999999999996	0.713228282	-1.178603349	1.973865084	-0.123424851	3.1998207119999997	2.296920647	7.36	1.05	2.2	5.73	-1.41	1.48	1.05
Os-M-Os-V	0.23306500000000002	0.7283698120000001	-1.493939266	2.480486102	0.206316401	2.184506115	2.010722593	8.7	1.1	2.2	6.25	-1.5	1.49	1.13
Os-M-Os-Cr	0.371836	0.7117247179999999	-1.607067944	2.539489943	0.17870382899999998	2.132081274	2.021753963	8.7	1.1	2.2	6.25	-1.5	1.49	1.13
Os-M-Os-Mn	0.159935	0.696345745	-1.6634559740000001	2.600733239	0.20404134399999999	2.212144661	1.980593667	8.7	1.1	2.2	6.25	-1.5	1.49	1.13
Os-M-Os-Fe	0.159195	0.695304776	-1.505406644	2.4938242269999997	0.18388640399999998	2.362442747	2.081762607	8.7	1.1	2.2	6.25	-1.5	1.49	1.13
Os-M-Os-Co	0.103806	0.686977475	-1.5302873119999998	2.518333203	0.17158174199999998	2.3483097180000003	2.098665539	8.7	1.1	2.2	6.25	-1.5	1.49	1.13
Os-M-Os-Zn	-0.172966	0.712174172	-1.465977568	2.4356103609999997	-0.006469671	2.8401732180000003	2.01809246	8.7	1.1	2.2	6.25	-1.5	1.49	1.13
Os-M-Os-Zr	-0.5592159999999999	0.704370726	-1.280940261	2.397569584	0.281693611	2.5169746319999997	1.8916961019999998	8.7	1.1	2.2	6.25	-1.5	1.49	1.13
Os-M-Os-Nb	0.152079	0.716949402	-1.317926463	2.511457364	0.25778019399999996	2.37658862	1.999548172	8.7	1.1	2.2	6.25	-1.5	1.49	1.13
Os-M-Os-Mo	0.41058	0.707297594	-1.385800015	2.634174981	0.195034827	2.217167239	2.18792284	8.7	1.1	2.2	6.25	-1.5	1.49	1.13
Os-M-Os-Ru	0.08941	0.685500381	-1.5609213309999999	2.571161977	0.08694085800000001	2.258994056	2.2	8.7	1.1	2.2	6.25	-1.5	1.49	1.13
Os-M-Os-Rh	-0.016179	0.684576277	-1.5432627890000001	2.53787364	0.06013853	2.339102536	2.223700689	8.7	1.1	2.2	6.25	-1.5	1.49	1.13
Os-M-Os-Ta	0.16000899999999998	0.717205448	-1.35343068	2.578678047	0.269227922	2.408974145	1.961206185	8.7	1.1	2.2	6.25	-1.5	1.49	1.13
Os-M-Os-W	0.402565	0.7111280520000001	-1.380330598	2.726344675	0.210383044	2.276010999	2.24682619	8.7	1.1	2.2	6.25	-1.5	1.49	1.13
Os-M-Os-Re	0.21739299999999998	0.771634622	-2.190493064	2.445958606	-0.003612298	2.206134127	2.105338619	8.7	1.1	2.2	6.25	-1.5	1.49	1.13
Os-M-Os-Ir	0.093398	0.6886236040000001	-1.632722946	2.658424499	-0.043487887	2.362805954	2.2	8.7	1.1	2.2	6.25	-1.5	1.49	1.13
W-M-W-Sc	-0.9818030000000001	0.583483549	-0.33641345899999997	1.999045907	0.008240744	2.257270394	2.000322751	7.98	0.86	2.36	5.09	0.77	1.56	1.27
W-M-W-Ti	-1.204021	0.609244909	-0.499136035	2.004714641	0.00731075	2.219971249	2.076321583	7.98	0.86	2.36	5.09	0.77	1.56	1.27
W-M-W-V	-1.651676	0.604314174	-0.48657152	2.1491196280000002	-0.023747882	2.125369914	2.1120037419999997	7.98	0.86	2.36	5.09	0.77	1.56	1.27
W-M-W-Cr	-1.265101	0.5918963079999999	-0.459265108	2.203383788	-0.109103613	2.057950513	2.123590767	7.98	0.86	2.36	5.09	0.77	1.56	1.27
W-M-W-Mn	-0.9221229999999999	0.5756202770000001	-0.395169765	2.226047006	-0.155990888	2.049056949	2.080357206	7.98	0.86	2.36	5.09	0.77	1.56	1.27
W-M-W-Fe	-0.801096	0.548927215	-0.32686114	2.205228273	-0.20167145	2.090390581	2.186622079	7.98	0.86	2.36	5.09	0.77	1.56	1.27
W-M-W-Co	-0.6503180000000001	0.537009529	-0.333239176	2.285405616	-0.20434724699999998	2.091899128	2.20437642	7.98	0.86	2.36	5.09	0.77	1.56	1.27
W-M-W-Ni	-0.707023	0.529144297	-0.324657732	2.285467641	-0.203060728	2.168473493	2.214870875	7.98	0.86	2.36	5.09	0.77	1.56	1.27
W-M-W-Cu	-0.956303	0.51864045	-0.144349371	2.255188796	-0.20063450600000002	2.397256266	2.2113856259999998	7.98	0.86	2.36	5.09	0.77	1.56	1.27
W-M-W-Zn	-1.190806	0.536353965	-0.16975337	2.297254213	-0.263792566	2.8858854839999997	2.119744833	7.98	0.86	2.36	5.09	0.77	1.56	1.27
W-M-W-Ga	-1.327075	0.528926557	-0.133305859	2.430434095	-0.459339626	3.589552278	2.179425232	7.98	0.86	2.36	5.09	0.77	1.56	1.27
W-M-W-Y	-3.5645540000000002	0.5624668310000001	-0.238747022	2.011174413	-0.022954207	2.2626397380000003	1.936182771	7.98	0.86	2.36	5.09	0.77	1.56	1.27
W-M-W-Zr	-2.002457	0.561733032	-0.22731778600000002	2.060574335	-0.033156013	2.191550042	1.9869818240000001	7.98	0.86	2.36	5.09	0.77	1.56	1.27
W-M-W-Nb	-2.078622	0.567842996	-0.257447999	2.1126273540000002	-0.054732607999999995	2.154937218	2.100266459	7.98	0.86	2.36	5.09	0.77	1.56	1.27
W-M-W-Mo	-1.8139	0.56473897	-0.22426346100000003	2.225884267	-0.087904171	2.13105327	2.298129658	7.98	0.86	2.36	5.09	0.77	1.56	1.27
W-M-W-Ru	-0.547732	0.5390889170000001	-0.242484776	2.341179525	-0.268243899	2.134252524	2.310815151	7.98	0.86	2.36	5.09	0.77	1.56	1.27
W-M-W-Rh	-0.57453	0.52617033	-0.302006968	2.367242169	-0.30837685	2.201878265	2.335709656	7.98	0.86	2.36	5.09	0.77	1.56	1.27
W-M-W-Pd	-0.790533	0.516389355	-0.279534692	2.299461763	-0.3362498	2.389039298	2.310815151	7.98	0.86	2.36	5.09	0.77	1.56	1.27
W-M-W-Ag	-1.0425659999999999	0.514698462	-0.10430848300000001	2.215687167	-0.32191489100000004	2.682638875	2.221803235	7.98	0.86	2.36	5.09	0.77	1.56	1.27
W-M-W-In	-1.402945	0.532602543	-0.195531834	2.323411855	-0.619851052	4.623766166	2.168524848	7.98	0.86	2.36	5.09	0.77	1.56	1.27
W-M-W-Sn	-1.356223	0.542685657	-0.285443147	2.353505944	-0.557648679	3.605899726	2.2321081	7.98	0.86	2.36	5.09	0.77	1.56	1.27
W-M-W-Re	-0.818094	0.6426360720000001	-0.7525926959999999	2.141206044	-0.289806782	2.342625735	2.2113856259999998	7.98	0.86	2.36	5.09	0.77	1.56	1.27
W-M-W-Os	-0.556774	0.547736168	-0.313423033	2.474127491	-0.314615043	2.283805542	2.310815151	7.98	0.86	2.36	5.09	0.77	1.56	1.27
W-M-W-Au	-1.067964	0.5178496260000001	-0.21918793600000003	2.351746082	-0.470849102	2.9020379530000002	2.412617741	7.98	0.86	2.36	5.09	0.77	1.56	1.27
W-M-W-Tl	-1.56514	0.52763793	-0.21985253300000002	2.311034264	-0.911495939	5.642358091	2.108108243	7.98	0.86	2.36	5.09	0.77	1.56	1.27
Ni-Ni3M-Sc	0.46197299999999997	0.877345913	-1.158323778	1.232370573	0.8505405340000001	6.207839517999999	1.846221998	7.64	1.16	1.91	5.77	-1.29	1.38	0.71
Ni-Ni3M-Ti	0.453218	0.877088931	-1.2509221590000001	1.304347095	0.670088118	5.452458363	1.8693133290000001	7.64	1.16	1.91	5.77	-1.29	1.38	0.71
Ni-Ni3M-V	-0.04572	0.872757015	-1.386622091	1.3515328619999998	0.572367074	5.050926786000001	1.8799607880000002	7.64	1.16	1.91	5.77	-1.29	1.38	0.71
Ni-Ni3M-Mn	0.6334810000000001	0.8693083779999999	-1.338842071	1.346870391	0.5461147789999999	5.1346471639999995	1.870523636	7.64	1.16	1.91	5.77	-1.29	1.38	0.71
Ni-Ni3M-Co	0.06278099999999999	0.865662405	-1.427583808	1.377518234	0.47095086700000005	4.942833212	1.9069785819999998	7.64	1.16	1.91	5.77	-1.29	1.38	0.71
Ni-Ni3M-Cu	0.518211	0.870360207	-1.314528649	1.337147914	0.420993347	5.112893557	1.9089976359999998	7.64	1.16	1.91	5.77	-1.29	1.38	0.71
Ni-Ni3M-Zn	0.517656	0.876712218	-1.29597081	1.305582058	0.35617497600000003	5.80638165	1.88225485	7.64	1.16	1.91	5.77	-1.29	1.38	0.71
Ni-Ni3M-Ga	0.482286	0.873215176	-1.2955485409999998	1.32165419	0.296026343	6.854428761	1.899756276	7.64	1.16	1.91	5.77	-1.29	1.38	0.71
Ni-Ni3M-Zr	-0.350169	0.876068181	-1.092046471	1.232059932	0.822810723	6.21702789	1.84210845	7.64	1.16	1.91	5.77	-1.29	1.38	0.71
Ni-Ni3M-Nb	-0.208815	0.873569959	-1.281830146	1.313821155	0.688599124	5.597975149	1.8764717419999999	7.64	1.16	1.91	5.77	-1.29	1.38	0.71
Ni-Ni3M-Mo	-0.080052	0.8657190999999999	-1.3388075659999998	1.340970714	0.503829661	5.27960444	1.933639039	7.64	1.16	1.91	5.77	-1.29	1.38	0.71
Ni-Ni3M-Rh	0.391848	0.8669961709999999	-1.344106566	1.319772886	0.426243514	5.203641546	1.9441220019999998	7.64	1.16	1.91	5.77	-1.29	1.38	0.71
Ni-Ni3M-Ag	0.41889099999999996	0.87146857	-1.221159408	1.239658578	0.338820891	5.9650260920000004	1.911990638	7.64	1.16	1.91	5.77	-1.29	1.38	0.71
Ni-Ni3M-Sn	0.368385	0.8818102290000001	-1.213817615	1.229044389	0.348975983	7.20341134	1.914942058	7.64	1.16	1.91	5.77	-1.29	1.38	0.71
Ni-Ni3M-Ta	-0.219408	0.872678211	-1.251224553	1.334631618	0.689386776	5.64229022	1.864400267	7.64	1.16	1.91	5.77	-1.29	1.38	0.71
Ni-Ni3M-W	0.349071	0.870130535	-1.406191961	1.3788971140000001	0.524371424	5.3273092239999995	1.950838109	7.64	1.16	1.91	5.77	-1.29	1.38	0.71
Ni-Ni3M-Re	-0.0376	0.871717525	-1.4333040890000002	1.391615735	0.38239626200000004	5.16280469	1.9089976359999998	7.64	1.16	1.91	5.77	-1.29	1.38	0.71
Ni-Ni3M-Pt	0.371687	0.8692312209999999	-1.321235364	1.303880443	0.292030762	5.486551567999999	1.9441220019999998	7.64	1.16	1.91	5.77	-1.29	1.38	0.71
Ni-Ni3M-Au	0.382718	0.864295025	-1.213907991	1.258763413	0.203081755	6.10344864	1.965230077	7.64	1.16	1.91	5.77	-1.29	1.38	0.71
Ni-Ni3M-Pb	0.342194	0.876883876	-1.161431899	1.194543917	0.3199511	8.043172284	1.948343929	7.64	1.16	1.91	5.77	-1.29	1.38	0.71
Pd-Pd3M-Sc	1.098278	0.921800208	-1.7387079580000002	1.412439405	0.795367678	4.810576035	2.096690385	8.34	0.56	2.2	5.9	-1.83	1.52	0.94
Pd-Pd3M-Ti	0.848474	0.921729872	-2.0747461609999998	1.523255011	0.650761595	4.06532287	2.1229144090000003	8.34	0.56	2.2	5.9	-1.83	1.52	0.94
Pd-Pd3M-V	1.0046899999999999	0.9221150220000001	-2.102343805	1.541832237	0.597452309	3.995159035	2.13500636	8.34	0.56	2.2	5.9	-1.83	1.52	0.94
Pd-Pd3M-Cr	1.058144	0.9180896479999999	-1.85938333	1.4792463319999998	0.542224032	4.097005558999999	2.13890365	8.34	0.56	2.2	5.9	-1.83	1.52	0.94
Pd-Pd3M-Co	1.074999	0.915753295	-1.969499675	1.556326378	0.431910653	3.7963181410000004	2.165689534	8.34	0.56	2.2	5.9	-1.83	1.52	0.94
Pd-Pd3M-Ni	1.055259	0.913592672	-1.869474116	1.52282385	0.423726455	3.8353206319999997	2.169120853	8.34	0.56	2.2	5.9	-1.83	1.52	0.94
Pd-Pd3M-Cu	1.064919	0.917925604	-1.813970861	1.492623433	0.423477345	3.901440777	2.167982503	8.34	0.56	2.2	5.9	-1.83	1.52	0.94
Pd-Pd3M-Zn	1.064449	0.920784797	-1.8223489959999999	1.463595165	0.344058652	4.251223073999999	2.137611647	8.34	0.56	2.2	5.9	-1.83	1.52	0.94
Pd-Pd3M-Ga	0.998157	0.9234091879999999	-1.881319688	1.494450677	0.311280613	5.127054103	2.157487411	8.34	0.56	2.2	5.9	-1.83	1.52	0.94
Pd-Pd3M-Zr	0.84139	0.923457282	-1.9004918240000002	1.4692229119999998	0.857262181	4.7865309069999995	2.09201877	8.34	0.56	2.2	5.9	-1.83	1.52	0.94
Pd-Pd3M-Nb	0.950469	0.9193789379999999	-2.17030264	1.5531615419999998	0.7115625870000001	4.165547139	2.131043972	8.34	0.56	2.2	5.9	-1.83	1.52	0.94
Pd-Pd3M-Mo	0.9273899999999999	0.916957404	-2.112487144	1.532801527	0.5847589470000001	3.972726816	2.195966891	8.34	0.56	2.2	5.9	-1.83	1.52	0.94
Pd-Pd3M-Ru	0.930945	0.914548679	-1.912569772	1.4995172890000001	0.42876388299999996	3.817362733	2.2	8.34	0.56	2.2	5.9	-1.83	1.52	0.94
Pd-Pd3M-Rh	0.950082	0.917119256	-1.810204556	1.4647812930000002	0.417200135	3.936253185	2.207872028	8.34	0.56	2.2	5.9	-1.83	1.52	0.94
Pd-Pd3M-Ag	0.992907	0.9186025440000001	-1.596535332	1.373857174	0.37937525200000005	4.354588487	2.171381551	8.34	0.56	2.2	5.9	-1.83	1.52	0.94
Pd-Pd3M-In	1.0007629999999998	0.9261678790000001	-1.692102099	1.386944285	-0.0017454389999999999	8.703711563999999	2.15388451	8.34	0.56	2.2	5.9	-1.83	1.52	0.94
Pd-Pd3M-Sn	0.91776	0.9277480770000001	-1.7421400409999999	1.399713885	0.290257992	5.625174834	2.174733377	8.34	0.56	2.2	5.9	-1.83	1.52	0.94
Pd-Pd3M-La	1.028133	0.9245264809999999	-1.4354897919999998	1.256265953	1.038552848	6.176436487	2.052672581	8.34	0.56	2.2	5.9	-1.83	1.52	0.94
Pd-Pd3M-Ta	0.9636040000000001	0.9194391740000001	-2.210003881	1.606736727	0.7449401920000001	4.270341351	2.117334815	8.34	0.56	2.2	5.9	-1.83	1.52	0.94
Pd-Pd3M-W	0.9352860000000001	0.916850924	-2.298699927	1.616421561	0.602072107	3.974940008	2.215499279	8.34	0.56	2.2	5.9	-1.83	1.52	0.94
Pd-Pd3M-Re	0.9342590000000001	0.916954458	-2.2071608680000003	1.602875619	0.47709359799999995	3.78500093	2.167982503	8.34	0.56	2.2	5.9	-1.83	1.52	0.94
Pd-Pd3M-Os	0.9189370000000001	0.916642368	-2.063650729	1.571700765	0.40367195100000003	3.7509087639999996	2.2	8.34	0.56	2.2	5.9	-1.83	1.52	0.94
Pd-Pd3M-Ir	0.937127	0.9159029590000001	-1.8772715830000002	1.504886575	0.364128064	3.873838157	2.2	8.34	0.56	2.2	5.9	-1.83	1.52	0.94
Pd-Pd3M-Au	0.944069	0.919784395	-1.60729436	1.3902378919999998	0.312857247	4.326565512	2.2318437380000002	8.34	0.56	2.2	5.9	-1.83	1.52	0.94
Pd-Pd3M-Tl	0.952643	0.927853771	-1.615952917	1.356247784	-0.063276573	8.281185729	2.13369291	8.34	0.56	2.2	5.9	-1.83	1.52	0.94
Pd-Pd3M-Pb	0.906582	0.9279467309999999	-1.594482865	1.322475171	0.202564925	6.7040065339999995	2.212666725	8.34	0.56	2.2	5.9	-1.83	1.52	0.94
Pd-Pd3M-Bi	1.000713	0.928151562	-1.6583001990000001	1.3632668330000002	-0.240445186	9.397069345	2.181300755	8.34	0.56	2.2	5.9	-1.83	1.52	0.94
Pt-Pt3M-Ti	1.010892	0.882534557	-2.410907259	1.977216993	0.44148940600000003	3.31368169	2.192266939	9.0	2.13	2.28	6.74	-2.25	1.53	1.04
Pt-Pt3M-V	1.00306	0.87720717	-2.451571242	2.010614073	0.38598347200000005	3.219856236	2.204753916	9.0	2.13	2.28	6.74	-2.25	1.53	1.04
Pt-Pt3M-Cr	1.086905	0.8773690559999999	-2.316274373	1.9828982309999998	0.33104216	3.24720347	2.208778525	9.0	2.13	2.28	6.74	-2.25	1.53	1.04
Pt-Pt3M-Mn	1.11399	0.874319485	-2.2334614619999997	1.963941433	0.329258838	3.268569619	2.193686346	9.0	2.13	2.28	6.74	-2.25	1.53	1.04
Pt-Pt3M-Co	1.1306559999999999	0.875142023	-2.389711519	2.048370994	0.273428235	3.1084936689999996	2.236439464	9.0	2.13	2.28	6.74	-2.25	1.53	1.04
Pt-Pt3M-Cu	1.1414309999999999	0.873912841	-2.228663062	1.9818961880000001	0.253254559	3.164150297	2.238807342	9.0	2.13	2.28	6.74	-2.25	1.53	1.04
Pt-Pt3M-Zn	1.1085209999999999	0.88092144	-2.272448788	1.945845558	0.252824434	3.363093884	2.207444314	9.0	2.13	2.28	6.74	-2.25	1.53	1.04
Pt-Pt3M-Ga	0.9984790000000001	0.880339743	-2.275099695	1.957417032	0.245491104	3.559442818	2.22796939	9.0	2.13	2.28	6.74	-2.25	1.53	1.04
Pt-Pt3M-Nb	0.984707	0.878712888	-2.363604783	1.962256565	0.488502933	3.3717720730000003	2.200662082	9.0	2.13	2.28	6.74	-2.25	1.53	1.04
Pt-Pt3M-Mo	0.970561	0.875471363	-2.3967796530000003	1.971528111	0.39958236	3.239330137	2.2677059390000003	9.0	2.13	2.28	6.74	-2.25	1.53	1.04
Pt-Pt3M-Ru	0.9915459999999999	0.875239092	-2.2636323380000003	1.9587002669999998	0.26934606899999997	3.207338855	2.271870804	9.0	2.13	2.28	6.74	-2.25	1.53	1.04
Pt-Pt3M-Rh	1.004139	0.8740055109999999	-2.201361609	1.943600922	0.251663812	3.2274959460000003	2.28	9.0	2.13	2.28	6.74	-2.25	1.53	1.04
Pt-Pt3M-Pd	1.005933	0.876004455	-2.10775449	1.8982386619999998	0.238194047	3.252885205	2.271870804	9.0	2.13	2.28	6.74	-2.25	1.53	1.04
Pt-Pt3M-Ag	1.025871	0.8779245390000001	-2.013856435	1.834398466	0.226555062	3.379610511	2.2423174319999997	9.0	2.13	2.28	6.74	-2.25	1.53	1.04
Pt-Pt3M-In	0.952816	0.8845245159999999	-2.098891052	1.8375026540000001	0.094399065	5.071776792	2.224248788	9.0	2.13	2.28	6.74	-2.25	1.53	1.04
Pt-Pt3M-Sn	0.91535	0.885095958	-2.0352030919999997	1.809877481	0.23860744399999997	3.975469632	2.245778757	9.0	2.13	2.28	6.74	-2.25	1.53	1.04
Pt-Pt3M-La	0.923069	0.886890416	-1.751527845	1.621412965	0.586282464	4.323174964	2.119730412	9.0	2.13	2.28	6.74	-2.25	1.53	1.04
Pt-Pt3M-Ta	0.991821	0.8794997720000001	-2.378650115	2.009628446	0.520332864	3.421117135	2.1865050669999997	9.0	2.13	2.28	6.74	-2.25	1.53	1.04
Pt-Pt3M-W	0.9959610000000001	0.875451247	-2.521651223	2.042177101	0.41835592	3.2199751269999997	2.287876422	9.0	2.13	2.28	6.74	-2.25	1.53	1.04
Pt-Pt3M-Re	0.986524	0.87609361	-2.516846987	2.055766031	0.33594852299999994	3.1243532189999996	2.238807342	9.0	2.13	2.28	6.74	-2.25	1.53	1.04
Pt-Pt3M-Os	0.957519	0.8767472	-2.3868879919999997	2.016146015	0.26752605	3.142616033	2.271870804	9.0	2.13	2.28	6.74	-2.25	1.53	1.04
Pt-Pt3M-Ir	0.987455	0.8758814559999999	-2.2440358380000003	1.961940667	0.225699603	3.19048307	2.271870804	9.0	2.13	2.28	6.74	-2.25	1.53	1.04
Pt-Pt3M-Au	0.966825	0.880550698	-2.002081783	1.836494377	0.193367772	3.37774555	2.304754831	9.0	2.13	2.28	6.74	-2.25	1.53	1.04
Pt-Pt3M-Tl	0.904781	0.883495912	-1.9877678490000001	1.790048708	0.043342020999999994	4.962589471	2.2033975580000003	9.0	2.13	2.28	6.74	-2.25	1.53	1.04
Pt-Pt3M-Bi	0.9473870000000001	0.889807692	-1.9383116280000001	1.7597606280000002	0.06797768	5.592415217	2.252560682	9.0	2.13	2.28	6.74	-2.25	1.53	1.04
Rh-Rh3M-Sc	0.57731	0.797408663	-1.444311759	1.775491369	0.49711850399999996	3.522065767	2.165186214	7.46	1.14	2.28	5.91	-1.73	1.49	0.99
Rh-Rh3M-Ti	0.643193	0.801863048	-1.697319482	1.896515271	0.423261165	3.1209263010000003	2.192266939	7.46	1.14	2.28	5.91	-1.73	1.49	0.99
Rh-Rh3M-V	0.168972	0.7908725999999999	-1.797375255	1.965435316	0.378668127	2.960296698	2.204753916	7.46	1.14	2.28	5.91	-1.73	1.49	0.99
Rh-Rh3M-Cr	0.697696	0.7916423429999999	-1.7770637269999998	1.970591913	0.330525412	2.959760357	2.208778525	7.46	1.14	2.28	5.91	-1.73	1.49	0.99
Rh-Rh3M-Mn	0.674981	0.7923520740000001	-1.7234116080000002	1.9589856959999998	0.297210537	2.99801583	2.193686346	7.46	1.14	2.28	5.91	-1.73	1.49	0.99
Rh-Rh3M-Co	0.631682	0.795126676	-1.709092091	1.934352165	0.289042777	3.008974026	2.236439464	7.46	1.14	2.28	5.91	-1.73	1.49	0.99
Rh-Rh3M-Ni	0.62228	0.7962473170000001	-1.710316081	1.9242418609999998	0.280211424	3.034499887	2.23998288	7.46	1.14	2.28	5.91	-1.73	1.49	0.99
Rh-Rh3M-Cu	0.575603	0.79667497	-1.617440194	1.878171834	0.261615595	3.104961815	2.238807342	7.46	1.14	2.28	5.91	-1.73	1.49	0.99
Rh-Rh3M-Zn	0.652371	0.802579574	-1.5762089259999998	1.8538562840000001	0.23482920899999998	3.3048546589999996	2.207444314	7.46	1.14	2.28	5.91	-1.73	1.49	0.99
Rh-Rh3M-Ga	0.6614770000000001	0.7973743670000001	-1.5869457969999998	1.87440014	0.191948797	3.703540897	2.22796939	7.46	1.14	2.28	5.91	-1.73	1.49	0.99
Rh-Rh3M-Y	0.423545	0.79392371	-1.311930244	1.643021801	0.566427219	3.971072828	2.141792263	7.46	1.14	2.28	5.91	-1.73	1.49	0.99
Rh-Rh3M-Zr	0.590861	0.798325915	-1.48877344	1.781909433	0.529615731	3.520880485	2.160361984	7.46	1.14	2.28	5.91	-1.73	1.49	0.99
Rh-Rh3M-Nb	0.5692189999999999	0.792153219	-1.6481303459999999	1.8821381069999998	0.43837703899999997	3.1395511369999998	2.200662082	7.46	1.14	2.28	5.91	-1.73	1.49	0.99
Rh-Rh3M-Mo	0.5756680000000001	0.789647793	-1.737334036	1.924897794	0.369814753	3.008452082	2.2677059390000003	7.46	1.14	2.28	5.91	-1.73	1.49	0.99
Rh-Rh3M-Ru	0.5478	0.793162108	-1.7405456240000001	1.8985010830000002	0.293702507	3.064880528	2.271870804	7.46	1.14	2.28	5.91	-1.73	1.49	0.99
Rh-Rh3M-Pd	0.510634	0.795415181	-1.5992849580000001	1.811227058	0.24296309600000002	3.222875684	2.271870804	7.46	1.14	2.28	5.91	-1.73	1.49	0.99
Rh-Rh3M-Ag	0.510894	0.798183102	-1.4816972640000001	1.746974826	0.24342736899999998	3.44722036	2.2423174319999997	7.46	1.14	2.28	5.91	-1.73	1.49	0.99
Rh-Rh3M-In	0.568855	0.797387453	-1.438600485	1.7438232880000002	0.031009497999999996	5.342603313	2.224248788	7.46	1.14	2.28	5.91	-1.73	1.49	0.99
Rh-Rh3M-Ta	0.549184	0.7938670809999999	-1.6483375569999998	1.9091050930000002	0.45086173700000004	3.191725768	2.1865050669999997	7.46	1.14	2.28	5.91	-1.73	1.49	0.99
Rh-Rh3M-W	0.566578	0.791901228	-1.7674432830000002	1.9706425369999998	0.375418424	3.014280743	2.287876422	7.46	1.14	2.28	5.91	-1.73	1.49	0.99
Rh-Rh3M-Re	0.539871	0.791230192	-1.8383168680000002	2.001493549	0.303931601	2.941745811	2.238807342	7.46	1.14	2.28	5.91	-1.73	1.49	0.99
Rh-Rh3M-Ir	0.525968	0.790134578	-1.723623144	1.909215254	0.22039072899999998	3.107620165	2.271870804	7.46	1.14	2.28	5.91	-1.73	1.49	0.99
Rh-Rh3M-Pt	0.506425	0.789017139	-1.6105778640000001	1.8390689919999998	0.186923891	3.257606664	2.28	7.46	1.14	2.28	5.91	-1.73	1.49	0.99
Rh-Rh3M-Au	0.511173	0.7924645490000001	-1.5033250040000001	1.768913133	0.17285277100000002	3.4872296080000003	2.304754831	7.46	1.14	2.28	5.91	-1.73	1.49	0.99
Rh-Rh3M-Tl	0.523432	0.797942447	-1.4116482080000001	1.725156177	-0.011647188000000001	5.213106498	2.2033975580000003	7.46	1.14	2.28	5.91	-1.73	1.49	0.99
Ir-Ir3M-Sc	0.6148779999999999	0.7744779070000001	-1.788384099	2.250539283	0.227144929	2.84357762	2.096690385	9.1	1.57	2.2	6.63	-2.11	1.5	1.08
Ir-Ir3M-Ti	0.714775	0.773457438	-1.98110789	2.377973715	0.210311229	2.630024935	2.1229144090000003	9.1	1.57	2.2	6.63	-2.11	1.5	1.08
Ir-Ir3M-Ni	0.665647	0.772118463	-2.066493803	2.428908055	0.100401006	2.606411939	2.169120853	9.1	1.57	2.2	6.63	-2.11	1.5	1.08
Ir-Ir3M-Cu	0.604104	0.7749495759999999	-1.9712480369999998	2.3751962069999997	0.08348884	2.6466126	2.167982503	9.1	1.57	2.2	6.63	-2.11	1.5	1.08
Ir-Ir3M-Zn	0.725332	0.776392119	-1.901301405	2.341214122	0.070313655	2.7481933730000003	2.137611647	9.1	1.57	2.2	6.63	-2.11	1.5	1.08
Ir-Ir3M-Ga	0.656224	0.7784716629999999	-1.96965708	2.368837364	0.051226275999999994	2.897540415	2.157487411	9.1	1.57	2.2	6.63	-2.11	1.5	1.08
Ir-Ir3M-Y	0.445539	0.7736519390000001	-1.654236565	2.093741569	0.23240223399999999	3.065206965	2.074036504	9.1	1.57	2.2	6.63	-2.11	1.5	1.08
Ir-Ir3M-Zr	0.594006	0.7715074829999999	-1.7899473559999999	2.2347613369999997	0.24606679899999997	2.835988883	2.09201877	9.1	1.57	2.2	6.63	-2.11	1.5	1.08
Ir-Ir3M-Nb	0.640884	0.772533932	-1.990622296	2.350227477	0.23579797600000002	2.662710356	2.131043972	9.1	1.57	2.2	6.63	-2.11	1.5	1.08
Ir-Ir3M-Mo	0.626663	0.768854755	-2.092099514	2.401684601	0.2103953	2.582228814	2.195966891	9.1	1.57	2.2	6.63	-2.11	1.5	1.08
Ir-Ir3M-Ru	0.647628	0.768432989	-2.078216269	2.3901574269999997	0.121123276	2.593033965	2.2	9.1	1.57	2.2	6.63	-2.11	1.5	1.08
Ir-Ir3M-Rh	0.655798	0.768666665	-2.061055173	2.369302853	0.09426122099999999	2.63315668	2.207872028	9.1	1.57	2.2	6.63	-2.11	1.5	1.08
Ir-Ir3M-Pd	0.568477	0.771118675	-1.968638396	2.310743539	0.064164237	2.6967606710000003	2.2	9.1	1.57	2.2	6.63	-2.11	1.5	1.08
Ir-Ir3M-Ag	0.527291	0.773854589	-1.8255730940000001	2.232103247	0.051020797	2.812443721	2.171381551	9.1	1.57	2.2	6.63	-2.11	1.5	1.08
Ir-Ir3M-La	0.317673	0.7725246179999999	-1.616280221	2.049907225	0.20418507	3.18698838	2.052672581	9.1	1.57	2.2	6.63	-2.11	1.5	1.08
Ir-Ir3M-Ta	0.644352	0.771110588	-1.977880808	2.376494348	0.246492805	2.682634115	2.117334815	9.1	1.57	2.2	6.63	-2.11	1.5	1.08
Ir-Ir3M-W	0.599128	0.77006545	-2.1096649569999997	2.4392977940000002	0.225146307	2.58823213	2.215499279	9.1	1.57	2.2	6.63	-2.11	1.5	1.08
Ir-Ir3M-Re	0.649301	0.7698383000000001	-2.1827666690000003	2.478634654	0.181201748	2.5350921459999998	2.167982503	9.1	1.57	2.2	6.63	-2.11	1.5	1.08
Ir-Ir3M-Os	0.654029	0.767817557	-2.157291723	2.452725128	0.12588843	2.553765448	2.2	9.1	1.57	2.2	6.63	-2.11	1.5	1.08
Ir-Ir3M-Pt	0.560782	0.7697200059999999	-2.00665589	2.33527493	0.042004415999999996	2.709558518	2.207872028	9.1	1.57	2.2	6.63	-2.11	1.5	1.08
Ir-Ir3M-Au	0.490965	0.76972752	-1.859326157	2.256134187	0.016161653	2.828428567	2.2318437380000002	9.1	1.57	2.2	6.63	-2.11	1.5	1.08
Ir-Ir3M-Tl	0.5003770000000001	0.7738676729999999	-1.7491415330000002	2.183631239	-0.115723572	3.690992229	2.13369291	9.1	1.57	2.2	6.63	-2.11	1.5	1.08
Ir-Ir3M-Bi	0.340885	0.777799968	-1.7681704130000002	2.1516863390000003	-0.097847539	3.66892282	2.181300755	9.1	1.57	2.2	6.63	-2.11	1.5	1.08
Re-Re3M-Sc	-0.652021	0.5950801379999999	-0.5773832760000001	2.589528565	0.091686128	2.2578483830000002	1.837520241	7.88	0.15	1.9	5.88	-0.51	1.52	1.2
Re-Re3M-Ti	-0.388088	0.599286659	-0.652853025	2.6829086859999998	0.076173764	2.18206563	1.860502736	7.88	0.15	1.9	5.88	-0.51	1.52	1.2
Re-Re3M-V	-0.196785	0.590159178	-0.726197676	2.7654115710000005	0.048264275	2.127330998	1.871100011	7.88	0.15	1.9	5.88	-0.51	1.52	1.2
Re-Re3M-Cr	-0.173208	0.5904088829999999	-0.778640193	2.8344418489999996	0.037146135	2.090736592	1.87451556	7.88	0.15	1.9	5.88	-0.51	1.52	1.2
Re-Re3M-Mn	-0.412425	0.589862369	-0.8629850379999999	2.888995608	0.033862859	2.075520417	1.861707339	7.88	0.15	1.9	5.88	-0.51	1.52	1.2
Re-Re3M-Co	-0.16868	0.592264965	-0.990455498	2.934668595	0.031140507	2.068337346	1.8979904630000002	7.88	0.15	1.9	5.88	-0.51	1.52	1.2
Re-Re3M-Ni	-0.277887	0.589821785	-1.031899352	2.92507601	0.021840362000000002	2.087403738	1.900997639	7.88	0.15	1.9	5.88	-0.51	1.52	1.2
Re-Re3M-Cu	-0.370345	0.589950133	-0.968255775	2.8522355	-0.001470474	2.147973764	1.9	7.88	0.15	1.9	5.88	-0.51	1.52	1.2
Re-Re3M-Zr	-0.43442200000000003	0.59279059	-0.518056262	2.566557655	0.079031412	2.263882866	1.833426081	7.88	0.15	1.9	5.88	-0.51	1.52	1.2
Re-Re3M-Nb	-0.259826	0.589238334	-0.579950495	2.659981362	0.063782369	2.199573269	1.86762741	7.88	0.15	1.9	5.88	-0.51	1.52	1.2
Re-Re3M-Mo	-0.12441700000000001	0.589997788	-0.645487382	2.736441254	0.031527589	2.141135573	1.9245252609999999	7.88	0.15	1.9	5.88	-0.51	1.52	1.2
Re-Re3M-Ru	0.06467200000000001	0.592100023	-0.8049149109999999	2.8355862519999997	-0.003191849	2.086292495	1.9280598409999998	7.88	0.15	1.9	5.88	-0.51	1.52	1.2
Re-Re3M-Rh	0.014990999999999999	0.5875143	-0.888945071	2.8500677339999996	-0.016494506000000003	2.107420437	1.934958815	7.88	0.15	1.9	5.88	-0.51	1.52	1.2
Re-Re3M-Pd	-0.047206	0.588224911	-0.9041676009999999	2.811186699	-0.033776554	2.160334998	1.9280598409999998	7.88	0.15	1.9	5.88	-0.51	1.52	1.2
Re-Re3M-Ag	-0.050423	0.590457419	-0.867558763	2.750431561	-0.059284218	2.245182195	1.902978895	7.88	0.15	1.9	5.88	-0.51	1.52	1.2
Re-Re3M-Ta	-0.24074299999999998	0.590552896	-0.595860176	2.671356136	0.069801078	2.218826809	1.855612831	7.88	0.15	1.9	5.88	-0.51	1.52	1.2
Re-Re3M-W	-0.193473	0.591174851	-0.660778356	2.75098755	0.038779174	2.162702798	1.941643267	7.88	0.15	1.9	5.88	-0.51	1.52	1.2
Re-Re3M-Os	0.08729400000000001	0.5944270970000001	-0.808904203	2.8808202560000002	-0.015069843000000001	2.097400325	1.9280598409999998	7.88	0.15	1.9	5.88	-0.51	1.52	1.2
Re-Re3M-Ir	0.001003	0.59067465	-0.902995392	2.8801463889999996	-0.041143723	2.1294313	1.9280598409999998	7.88	0.15	1.9	5.88	-0.51	1.52	1.2
Re-Re3M-Pt	-0.062437	0.589098534	-0.927745442	2.84385632	-0.070425541	2.1939848790000003	1.934958815	7.88	0.15	1.9	5.88	-0.51	1.52	1.2
Au3M-Ni	1.4960719999999998	0.9630102220000001	-3.3172022219999997	1.5155181619999998	1.136476541	6.741046514	2.331812423	9.23	2.31	2.54	6.01	-3.56	1.59	1.01
Au3M-Zn	1.3982379999999999	0.9694958909999999	-3.569188966	1.447055049	1.093408641	7.868282766	2.231663883	9.23	2.31	2.54	6.01	-3.56	1.59	1.01
Au3M-Ru	1.372716	0.959839639	-3.312742408	1.521076927	1.128822247	6.112686406	2.4328224	9.23	2.31	2.54	6.01	-3.56	1.59	1.01
Au3M-Rh	1.5276	0.9625249090000001	-3.143024922	1.4839922190000001	1.1127413179999999	6.254486795	2.459031294	9.23	2.31	2.54	6.01	-3.56	1.59	1.01
Au3M-Pd	1.48496	0.9662421809999999	-3.0338730189999996	1.4528226869999998	1.035745057	6.161243927999999	2.4328224	9.23	2.31	2.54	6.01	-3.56	1.59	1.01
Au3M-Ag	1.352419	0.9690434790000001	-3.383898283	1.4189866269999998	1.147511038	7.630098384	2.339110801	9.23	2.31	2.54	6.01	-3.56	1.59	1.01
Au3M-Ir	1.540573	0.9601775659999999	-3.195538765	1.5418642319999998	1.052256549	5.944804866	2.4328224	9.23	2.31	2.54	6.01	-3.56	1.59	1.01
Au3M-Pt	1.521248	0.9638796620000001	-3.0489095980000003	1.505640659	0.989216568	5.921681042	2.459031294	9.23	2.31	2.54	6.01	-3.56	1.59	1.01
Pt3M-Cr	0.7755989999999999	0.879274362	-2.298514089	1.946243205	0.519234686	3.515815092	2.072940417	9.0	2.13	2.28	6.74	-2.25	1.53	1.04
Pt3M-Mn	0.800805	0.879657137	-2.1658111069999997	1.90755816	0.471018244	3.569681367	2.030738032	9.0	2.13	2.28	6.74	-2.25	1.53	1.04
Pt3M-Co	0.9373819999999999	0.8792221029999999	-2.361596993	1.9605224669999999	0.35267	3.3420252660000003	2.15179923	9.0	2.13	2.28	6.74	-2.25	1.53	1.04
Pt3M-Ni	0.9196489999999999	0.878217426	-2.245337605	1.9239081759999999	0.34425361600000004	3.373708616	2.162043378	9.0	2.13	2.28	6.74	-2.25	1.53	1.04
Pt3M-Cu	0.936376	0.884750123	-2.1589434119999997	1.885201348	0.32435690899999997	3.4160892539999996	2.1586412569999998	9.0	2.13	2.28	6.74	-2.25	1.53	1.04
Pt3M-Zn	0.867632	0.895210095	-2.220138048	1.874530181	0.23931962699999998	3.8570153489999996	2.069186214	9.0	2.13	2.28	6.74	-2.25	1.53	1.04
Pt3M-Ru	0.9197790000000001	0.8704838220000001	-2.291007617	1.940412246	0.359894993	3.2425587360000003	2.25569926	9.0	2.13	2.28	6.74	-2.25	1.53	1.04
Pt3M-Pd	0.885188	0.876883732	-2.050425684	1.8439846000000002	0.277339748	3.3197833269999997	2.25569926	9.0	2.13	2.28	6.74	-2.25	1.53	1.04
Pt3M-Ag	0.8874209999999999	0.8876622040000001	-1.985543514	1.791250704	0.21793634899999997	3.591287408	2.1688103919999997	9.0	2.13	2.28	6.74	-2.25	1.53	1.04
Pt3M-In	0.5966090000000001	0.89355606	-2.106627939	1.875541051	-0.08189437	7.018267916	2.116802762	9.0	2.13	2.28	6.74	-2.25	1.53	1.04
Pt3M-Sn	0.8396040000000001	0.89550411	-2.167913475	1.8594982340000001	0.239710282	4.512258388	2.1788694730000002	9.0	2.13	2.28	6.74	-2.25	1.53	1.04
Pt3M-La	-0.247531	0.8932616290000001	-1.850182321	1.683195683	1.1185822029999999	5.1246022589999995	1.83219713	9.0	2.13	2.28	6.74	-2.25	1.53	1.04
Pt3M-Re	1.078363	0.871857453	-2.7040685539999996	2.116235004	0.45374477700000004	3.196309648	2.1586412569999998	9.0	2.13	2.28	6.74	-2.25	1.53	1.04
Pt3M-Os	0.9979819999999999	0.871803495	-2.462326551	2.043921978	0.350000824	3.1766096760000004	2.25569926	9.0	2.13	2.28	6.74	-2.25	1.53	1.04
Pt3M-Ir	0.9792040000000001	0.871840023	-2.256747744	1.9692450559999999	0.265308857	3.210752455	2.25569926	9.0	2.13	2.28	6.74	-2.25	1.53	1.04
Pt3M-Au	0.9839629999999999	0.886954776	-1.9958083269999998	1.83980059	0.138494869	3.446224022	2.355073729	9.0	2.13	2.28	6.74	-2.25	1.53	1.04
Pt3M-Tl	0.778231	0.8935010859999999	-2.032165163	1.8360094630000001	-0.141770899	6.330152137000001	2.057827171	9.0	2.13	2.28	6.74	-2.25	1.53	1.04
Pt3M-Bi	0.503124	0.8994053120000001	-2.214735126	1.8163205000000002	-0.079933773	6.65329654	2.19866875	9.0	2.13	2.28	6.74	-2.25	1.53	1.04
Pd3M-Ni	1.010688	0.915801469	-1.86182685	1.4815939830000002	0.529253916	4.210177798	2.108656732	8.34	0.56	2.2	5.9	-1.83	1.52	0.94
Pd3M-Cu	1.044025	0.921558342	-1.783368175	1.459154529	0.49041607200000004	4.2284044419999995	2.105338619	8.34	0.56	2.2	5.9	-1.83	1.52	0.94
Pd3M-Rh	0.951642	0.913152958	-1.8840137030000002	1.480331969	0.48128189	3.9794441989999996	2.223700689	8.34	0.56	2.2	5.9	-1.83	1.52	0.94
Pd3M-Ag	1.0109489999999999	0.923247048	-1.584004514	1.3803042509999999	0.271636212	4.672581141	2.115256651	8.34	0.56	2.2	5.9	-1.83	1.52	0.94
Pd3M-Os	1.0928	0.91157185	-2.292914853	1.6431309330000001	0.5000182320000001	3.773395942	2.2	8.34	0.56	2.2	5.9	-1.83	1.52	0.94
Pd3M-Ir	1.0606229999999999	0.91099597	-2.007594626	1.569579118	0.388043123	3.8267935360000003	2.2	8.34	0.56	2.2	5.9	-1.83	1.52	0.94
Pd3M-Au	1.074324	0.9220633	-1.615822789	1.43646114	0.146959906	4.384622643999999	2.296920647	8.34	0.56	2.2	5.9	-1.83	1.52	0.94
Ni3M-Mn	-0.280464	0.872117358	-1.260627302	1.3708620319999998	0.6282846910000001	5.170914876	1.794001767	7.64	1.16	1.91	5.77	-1.29	1.38	0.71
Ni3M-Co	-0.013994999999999999	0.8674840629999999	-1.512367864	1.402938693	0.46841514100000003	4.884401511	1.9009500780000002	7.64	1.16	1.91	5.77	-1.29	1.38	0.71
Ni3M-Cu	0.501965	0.869374291	-1.228559902	1.329445843	0.349954521	5.20249352	1.9069944859999999	7.64	1.16	1.91	5.77	-1.29	1.38	0.71
Ni3M-Zr	-0.939841	0.876992311	-1.2083232309999998	1.3247315929999999	1.0005942970000001	5.463867886	1.7134792490000001	7.64	1.16	1.91	5.77	-1.29	1.38	0.71
Ni3M-Rh	0.5016510000000001	0.868289364	-1.405093456	1.3730797780000001	0.34598995	4.8421958730000005	2.014205656	7.64	1.16	1.91	5.77	-1.29	1.38	0.71
Ni3M-Ag	0.427667	0.8827523190000001	-1.210322077	1.26944748	0.074733609	6.327208727	1.91597814	7.64	1.16	1.91	5.77	-1.29	1.38	0.71
Ni3M-Sn	-0.036215	0.884910383	-1.179596475	1.2989215570000001	0.232037537	8.394630624	1.9248645690000001	7.64	1.16	1.91	5.77	-1.29	1.38	0.71
Ni3M-La	-0.81157	0.883176255	-1.073575995	1.232466509	1.2318451240000001	6.361233637000001	1.6186060619999998	7.64	1.16	1.91	5.77	-1.29	1.38	0.71
Ni3M-Ir	0.6296510000000001	0.8645948729999999	-1.3545376269999998	1.409949528	0.12225888800000001	4.9869217589999995	1.992737811	7.64	1.16	1.91	5.77	-1.29	1.38	0.71
Ni3M-Pt	0.591809	0.870158361	-1.33667696	1.3786633659999998	0.046692853	5.146369538	2.014205656	7.64	1.16	1.91	5.77	-1.29	1.38	0.71
Ni3M-Au	-0.171878	0.873209758	-1.2148374720000001	1.322031411	-0.158489456	6.202369818999999	2.080527555	7.64	1.16	1.91	5.77	-1.29	1.38	0.71
Re3M-Ni	0.047231999999999996	0.589813888	-0.8638440540000001	2.744646193	-0.06449966	2.0871548630000003	1.90299449	7.88	0.15	1.9	5.88	-0.51	1.52	1.2
Re3M-Mo	-0.356327	0.587563624	-0.6268949770000001	2.700590572	0.069228154	2.120244423	1.9745295880000002	7.88	0.15	1.9	5.88	-0.51	1.52	1.2
Re3M-Rh	-0.18576900000000002	0.584648776	-0.851514533	2.775039607	-0.081996869	2.082666072	2.00681794	7.88	0.15	1.9	5.88	-0.51	1.52	1.2
Re3M-Pd	0.039229	0.588620126	-0.793917113	2.7523467210000003	-0.143548346	2.106330136	1.985428835	7.88	0.15	1.9	5.88	-0.51	1.52	1.2
Re3M-Ta	-0.621289	0.592794854	-0.622583653	2.640328136	0.17550105100000002	2.2681377819999997	1.7699251409999999	7.88	0.15	1.9	5.88	-0.51	1.52	1.2
Re3M-Os	0.019694999999999997	0.593536194	-0.9148257329999999	2.895078266	-0.049503190999999995	2.097451368	1.985428835	7.88	0.15	1.9	5.88	-0.51	1.52	1.2
Re3M-Pt	0.017375	0.591085843	-0.837859067	2.838378459	-0.185884119	2.149950762	2.00681794	7.88	0.15	1.9	5.88	-0.51	1.52	1.2
Rh3M-Cr	0.47915	0.7956322309999999	-1.72546554	1.9480487180000001	0.465507016	3.119293476	2.072940417	7.46	1.14	2.28	5.91	-1.73	1.49	0.99
Rh3M-Mn	0.493083	0.7963742420000001	-1.657106956	1.929650705	0.42741522299999996	3.1842373360000003	2.030738032	7.46	1.14	2.28	5.91	-1.73	1.49	0.99
Rh3M-Co	0.6020949999999999	0.79710329	-1.637073671	1.8819465640000002	0.34017486	3.180854758	2.15179923	7.46	1.14	2.28	5.91	-1.73	1.49	0.99
Rh3M-Ni	0.605896	0.794249345	-1.627646865	1.865820288	0.33229225	3.2086393089999996	2.162043378	7.46	1.14	2.28	5.91	-1.73	1.49	0.99
Ir3M-Ti	0.259024	0.7855402359999999	-1.8330833480000002	2.2953561380000003	0.380876696	2.787855237	1.976751572	9.1	1.57	2.2	6.63	-2.11	1.5	1.08
Ir3M-Ni	0.528826	0.7722195540000001	-1.9693879980000002	2.306804076	0.169120644	2.734154918	2.108656732	9.1	1.57	2.2	6.63	-2.11	1.5	1.08
Ir3M-Cu	0.49561499999999997	0.7746851359999999	-1.844645799	2.252898949	0.166101898	2.793486611	2.105338619	9.1	1.57	2.2	6.63	-2.11	1.5	1.08
Ir3M-Zn	0.603858	0.787689827	-1.80182975	2.206696766	0.083345566	3.0718221860000003	2.01809246	9.1	1.57	2.2	6.63	-2.11	1.5	1.08
Ir3M-Ga	0.57828	0.791655349	-1.8550337430000001	2.298199899	0.02486268	3.4910957039999997	2.074910885	9.1	1.57	2.2	6.63	-2.11	1.5	1.08
Ir3M-Ru	0.541147	0.767160775	-2.035151122	2.3474043	0.163340493	2.594280227	2.2	9.1	1.57	2.2	6.63	-2.11	1.5	1.08
Ir3M-Rh	0.541049	0.7697743290000001	-2.017752111	2.313034168	0.11967027599999999	2.6559075659999998	2.223700689	9.1	1.57	2.2	6.63	-2.11	1.5	1.08
Ir3M-Ag	0.37467	0.768103615	-1.68668871	2.162844499	0.056557231	2.9292679919999998	2.115256651	9.1	1.57	2.2	6.63	-2.11	1.5	1.08
Ir3M-La	-0.574629	0.7883757029999999	-1.42962098	2.015551668	0.5863262810000001	3.84851158	1.786955272	9.1	1.57	2.2	6.63	-2.11	1.5	1.08
Ir3M-Re	0.7047859999999999	0.7686485540000001	-2.239592708	2.518071075	0.224829698	2.542789347	2.105338619	9.1	1.57	2.2	6.63	-2.11	1.5	1.08
Ir3M-Os	0.679329	0.770074919	-2.2068249	2.476140865	0.156936257	2.55311774	2.2	9.1	1.57	2.2	6.63	-2.11	1.5	1.08
Ir3M-Pt	0.531434	0.769917482	-1.958488935	2.31679721	0.013913118	2.732763171	2.223700689	9.1	1.57	2.2	6.63	-2.11	1.5	1.08
Ir3M-Au	0.523295	0.775684108	-1.792757509	2.2201309680000003	-0.022955187000000002	2.9128220839999996	2.296920647	9.1	1.57	2.2	6.63	-2.11	1.5	1.08
Ir3M-Bi	0.291225	0.799275113	-1.752518356	2.180020421	-0.322187727	4.783200279	2.144377726	9.1	1.57	2.2	6.63	-2.11	1.5	1.08
Ag3M-Bi-V	-1.1016290000000002	0.37265133100000003	0.882000144	1.9138834880000002	-0.647345176	4.0193162739999995	1.897668456	6.75	0.53	1.63	4.88	1.06	1.49	0.98
Ag3M-Bi-Cr	-0.33032399999999995	0.48414582899999997	0.689299095	2.247559543	-0.236671627	2.457562718	1.9011325030000001	6.77	0.67	1.66	5.27	0.16	1.42	0.9
Ag3M-Bi-Mn	-0.38661	0.521884548	-1.232164319	2.434956199	0.140354126	1.778007835	1.8881424130000002	7.43	0.0	1.55	5.45	0.07	1.43	0.86
Ag3M-Bi-Co	-0.12643900000000002	0.767402805	-0.9982023390000001	1.407886535	-0.136476121	4.932671362	1.924940735	7.88	0.66	1.88	5.76	-1.17	1.39	0.76
Ag3M-Bi-Nb	-1.675531	0.41036775299999995	0.20064415600000002	2.035150415	-0.820296369	4.298648313999999	1.894146546	6.76	0.9	1.6	4.69	1.41	1.62	1.28
Ag3M-Bi-Mo	-0.757634	0.496041069	-0.11020617199999999	2.059515771	-0.472149117	3.471238874	1.951852311	7.09	0.75	2.16	5.09	0.35	1.55	1.2
Ag3M-Bi-Ru	-0.050761	0.738879643	-0.812187023	1.6665109619999998	-0.48311760299999995	4.6963249000000005	1.95543708	7.36	1.05	2.2	5.73	-1.41	1.48	1.05
Ag3M-Bi-Rh	0.383544	0.82690144	-0.735003249	1.470988591	-0.453161427	6.017242133	1.962434014	7.46	1.14	2.28	5.91	-1.73	1.49	0.99
Ag3M-Bi-Pd	0.941939	0.9372143340000001	-1.544110656	1.307087734	-0.127533374	6.790529672999999	1.95543708	8.34	0.56	2.2	5.9	-1.83	1.52	0.94
Ag3M-Bi-Ir	0.101646	0.809995024	-0.901043033	1.683389288	-0.45154288299999995	4.786759256	1.95543708	9.1	1.57	2.2	6.63	-2.11	1.5	1.08
Ag3M-Bi-Pt	0.7097060000000001	0.9099306359999999	-1.51550997	1.513225513	-0.066732769	5.379168507	1.962434014	9.0	2.13	2.28	6.74	-2.25	1.53	1.04
Au3M-Bi-Ti	-1.400001	0.229226122	0.7188260009999999	1.809871906	-1.108952717	6.051544806	2.416030525	6.83	0.08	1.54	4.63	1.5	1.61	1.08
Au3M-Bi-Cr	-0.133743	0.48205210299999995	0.721163903	2.3781887000000004	-0.36474492700000005	2.65605319	2.43422744	6.77	0.67	1.66	5.27	0.16	1.42	0.9
Au3M-Bi-Mn	-0.024003	0.522595361	-1.147283151	2.5312342969999997	0.071123819	1.753878368	2.417594811	7.43	0.0	1.55	5.45	0.07	1.43	0.86
Au3M-Bi-Co	0.220005	0.7701218190000001	-1.0963207590000001	1.533745234	-0.253254495	4.555456476	2.464711718	7.88	0.66	1.88	5.76	-1.17	1.39	0.76
Au3M-Bi-Ni	0.505941	0.884497977	-0.729314377	1.174218147	-0.838441818	9.620863707	2.468616808	7.64	1.16	1.91	5.77	-1.29	1.38	0.71
Au3M-Bi-Nb	-1.491211	0.38940293	0.095356066	2.335627164	-0.8547223290000001	3.805568664	2.425282557	6.76	0.9	1.6	4.69	1.41	1.62	1.28
Au3M-Bi-Mo	-0.647756	0.492444823	-0.24884198800000001	2.29719644	-0.5671281579999999	3.3119044189999998	2.499169546	7.09	0.75	2.16	5.09	0.35	1.55	1.2
Au3M-Bi-Pd	1.169243	0.9286152059999999	-1.482483545	1.472184605	-0.227914562	5.344926185	2.5037595169999998	8.34	0.56	2.2	5.9	-1.83	1.52	0.94
Au3M-Bi-Re	-0.9498139999999999	0.5796765629999999	-0.755182334	2.326868525	-0.5259914920000001	3.2619870110000004	2.467321284	7.88	0.15	1.9	5.88	-0.51	1.52	1.2
Au3M-Bi-Os	-0.435172	0.7020050440000001	-0.898691017	2.114575819	-0.537226498	3.6255245489999997	2.5037595169999998	8.7	1.1	2.2	6.25	-1.5	1.49	1.13
Au3M-Bi-Ir	0.28815100000000005	0.798762841	-1.134860931	1.94086783	-0.354301365	3.883588188	2.5037595169999998	9.1	1.57	2.2	6.63	-2.11	1.5	1.08
Au3M-Bi-Pt	0.8278760000000001	0.8999418709999999	-1.569142609	1.726187088	-0.076118055	4.3212093419999995	2.512718456	9.0	2.13	2.28	6.74	-2.25	1.53	1.04
Cu3M-Bi-Ti	-1.595596	0.23044663899999998	0.648896316	1.694856475	-0.711978634	4.76294807	1.860502736	6.83	0.08	1.54	4.63	1.5	1.61	1.08
Cu3M-Bi-V	-1.0901239999999999	0.37221123799999994	0.585487881	1.955123434	-0.486271856	3.321983271	1.871100011	6.75	0.53	1.63	4.88	1.06	1.49	0.98
Cu3M-Bi-Cr	-0.345197	0.483899852	0.444445185	2.2549502919999997	-0.159643321	2.282341614	1.87451556	6.77	0.67	1.66	5.27	0.16	1.42	0.9
Cu3M-Bi-Mn	-0.259811	0.528757615	-1.0025155190000001	2.386191674	0.152916393	1.8264522680000002	1.861707339	7.43	0.0	1.55	5.45	0.07	1.43	0.86
Cu3M-Bi-Co	0.054888	0.7559939990000001	-1.016919259	1.4968466459999998	0.089124706	4.001430077	1.8979904630000002	7.88	0.66	1.88	5.76	-1.17	1.39	0.76
Cu3M-Bi-Ni	0.327646	0.8836497390000001	-0.8820778359999999	1.236816289	-0.007104539	6.460060942999999	1.900997639	7.64	1.16	1.91	5.77	-1.29	1.38	0.71
Cu3M-Bi-Nb	-1.67635	0.39146776200000005	-0.021328033	2.075843124	-0.47292953600000004	3.325816834	1.86762741	6.76	0.9	1.6	4.69	1.41	1.62	1.28
Cu3M-Bi-Mo	-1.142032	0.5074829000000001	-0.326427015	2.113975554	-0.268260467	2.955264076	1.9245252609999999	7.09	0.75	2.16	5.09	0.35	1.55	1.2
Cu3M-Bi-Ru	0.151303	0.7368567229999999	-0.903431467	1.822879884	0.0029309759999999996	3.483906391	1.9280598409999998	7.36	1.05	2.2	5.73	-1.41	1.48	1.05
Cu3M-Bi-Rh	0.57287	0.817950229	-1.178931936	1.7102422240000001	0.27449296300000003	3.845540213	1.934958815	7.46	1.14	2.28	5.91	-1.73	1.49	0.99
Cu3M-Bi-Pd	1.014802	0.9293420990000001	-2.076005097	1.5041725469999998	0.743638523	4.911080267	1.9280598409999998	8.34	0.56	2.2	5.9	-1.83	1.52	0.94
Cu3M-Bi-W	-1.642508	0.482449499	-0.31954559	2.231078856	-0.335273607	3.006116688	1.941643267	7.98	0.86	2.36	5.09	0.77	1.56	1.27
Cu3M-Bi-Re	-1.17252	0.606024505	-0.71746567	2.179266057	-0.204008721	2.938825937	1.9	7.88	0.15	1.9	5.88	-0.51	1.52	1.2
Cu3M-Bi-Os	-0.431274	0.710072485	-1.024793396	2.072449714	-0.040566119	3.0057643460000003	1.9280598409999998	8.7	1.1	2.2	6.25	-1.5	1.49	1.13
Cu3M-Bi-Ir	0.344502	0.8033031559999999	-1.4070992919999998	1.9441542459999999	0.23438894600000001	3.2727396110000004	1.9280598409999998	9.1	1.57	2.2	6.63	-2.11	1.5	1.08
Cu3M-Bi-Pt	0.813038	0.897923348	-2.060338427	1.751446566	0.6581482439999999	4.048579516	1.934958815	9.0	2.13	2.28	6.74	-2.25	1.53	1.04
Cu3M-Bi-Au	1.319589	0.961031075	-3.8722317339999996	1.5376104680000002	1.9026957009999999	8.544841629	1.955967402	9.23	2.31	2.54	6.01	-3.56	1.59	1.01
Pt3M-Bi-Ti	-0.755567	0.2255616	0.481119907	1.998200885	-1.1634817990000001	4.775119158	2.192266939	6.83	0.08	1.54	4.63	1.5	1.61	1.08
Pt3M-Bi-V	-0.64127	0.361089824	0.20116522	2.0450186809999997	-0.915028031	3.956384948	2.204753916	6.75	0.53	1.63	4.88	1.06	1.49	0.98
Pt3M-Bi-Cr	-0.084832	0.472567609	0.282478309	2.3529285140000002	-0.430104669	2.556012651	2.208778525	6.77	0.67	1.66	5.27	0.16	1.42	0.9
Pt3M-Bi-Mn	0.322602	0.528556978	-0.4451405	2.49874719	-0.041021398	1.7902322380000002	2.193686346	7.43	0.0	1.55	5.45	0.07	1.43	0.86
Pt3M-Bi-Co	0.604051	0.756914358	-1.390390996	1.6898864569999998	-0.143244547	3.244616892	2.236439464	7.88	0.66	1.88	5.76	-1.17	1.39	0.76
Pt3M-Bi-Ni	0.7612479999999999	0.867425282	-1.1590531240000002	1.310936561	-0.450881088	5.682182159	2.23998288	7.64	1.16	1.91	5.77	-1.29	1.38	0.71
Pt3M-Bi-Cu	1.255333	0.970003528	-1.875682091	1.0996626809999999	-0.12416151800000001	6.916026266	2.238807342	7.73	1.24	1.9	5.3	-2.67	1.41	0.67
Pt3M-Bi-Nb	-1.147577	0.38039512	-0.449207106	2.535685488	-0.703352595	2.954758151	2.200662082	6.76	0.9	1.6	4.69	1.41	1.62	1.28
Pt3M-Bi-Mo	-0.7002510000000001	0.48931435700000003	-0.6154699539999999	2.373704504	-0.588111521	2.9558777810000003	2.2677059390000003	7.09	0.75	2.16	5.09	0.35	1.55	1.2
Pt3M-Bi-Ru	0.410341	0.701409831	-1.245101569	2.051257056	-0.31992707800000003	3.0801714810000003	2.271870804	7.36	1.05	2.2	5.73	-1.41	1.48	1.05
Pt3M-Bi-Rh	0.6808069999999999	0.786540885	-1.45501348	1.878744309	-0.123667949	3.412919238	2.28	7.46	1.14	2.28	5.91	-1.73	1.49	0.99
Pt3M-Bi-Pd	1.163669	0.9099990720000001	-1.904638368	1.6156449869999998	0.091912677	3.827154312	2.271870804	8.34	0.56	2.2	5.9	-1.83	1.52	0.94
Pt3M-Bi-Ag	1.8008790000000001	0.974587667	-3.420314898	1.333012448	1.4122730069999998	7.187454719	2.2423174319999997	7.58	1.3	1.93	5.01	-4.3	1.59	0.89
Pt3M-Bi-Ta	-1.521283	0.35003453	-0.340970785	2.7454482660000004	-0.713993682	2.860110031	2.1865050669999997	7.89	0.32	1.5	4.86	2.0	1.62	1.34
Pt3M-Bi-W	-1.2589629999999998	0.45290191	-0.680052329	2.560343598	-0.5984347210000001	2.904536448	2.287876422	7.98	0.86	2.36	5.09	0.77	1.56	1.27
Pt3M-Bi-Re	-0.682236	0.575442377	-1.050658325	2.493645009	-0.443933322	2.7309226019999997	2.238807342	7.88	0.15	1.9	5.88	-0.51	1.52	1.2
Pt3M-Bi-Os	-0.11501700000000001	0.682789277	-1.348180647	2.346860171	-0.314605937	2.741466265	2.271870804	8.7	1.1	2.2	6.25	-1.5	1.49	1.13
Pt3M-Bi-Ir	0.43463900000000005	0.77322972	-1.702820066	2.1612956480000003	-0.06889267	2.8546218760000004	2.271870804	9.1	1.57	2.2	6.63	-2.11	1.5	1.08
Pt3M-Bi-Au	1.6496540000000002	0.960753669	-3.1382464060000004	1.58250983	0.963460225	4.943288197	2.304754831	9.23	2.31	2.54	6.01	-3.56	1.59	1.01
Pd3M-Bi-Ti	-1.026286	0.221256194	0.45816968799999996	1.81392191	-1.001909004	4.587859012	2.1229144090000003	6.83	0.08	1.54	4.63	1.5	1.61	1.08
Pd3M-Bi-Cr	-0.26666799999999996	0.463627543	0.47985407399999996	2.237093074	-0.253714507	2.123305304	2.13890365	6.77	0.67	1.66	5.27	0.16	1.42	0.9
Pd3M-Bi-Co	0.283364	0.751277303	-1.367505016	1.610881148	0.105744151	2.908099146	2.165689534	7.88	0.66	1.88	5.76	-1.17	1.39	0.76
Pd3M-Bi-Ni	0.47361899999999996	0.8521584240000001	-1.06513191	1.2245095609999999	-0.017600528	5.101051839	2.169120853	7.64	1.16	1.91	5.77	-1.29	1.38	0.71
Pd3M-Bi-Cu	0.963015	0.97304531	-1.6111398380000002	0.9961434920000001	0.32704767100000004	6.988088297999999	2.167982503	7.73	1.24	1.9	5.3	-2.67	1.41	0.67
Pd3M-Bi-Nb	-1.41682	0.374103546	-0.359050252	2.182041138	-0.7026992670000001	3.182050195	2.131043972	6.76	0.9	1.6	4.69	1.41	1.62	1.28
Pd3M-Bi-Mo	-0.804982	0.484440475	-0.381089036	2.135426564	-0.48722871100000004	2.861793673	2.195966891	7.09	0.75	2.16	5.09	0.35	1.55	1.2
Pd3M-Bi-Ru	0.231183	0.699177253	-1.195670133	1.847822695	-0.080455871	2.89887162	2.2	7.36	1.05	2.2	5.73	-1.41	1.48	1.05
Pd3M-Bi-Rh	0.442053	0.7950102309999999	-1.302114864	1.666095585	0.10138054199999999	3.488050496	2.207872028	7.46	1.14	2.28	5.91	-1.73	1.49	0.99
Pd3M-Bi-Ag	1.59402	0.9783813509999999	-3.2622196060000004	1.209403378	1.976161676	9.071559317	2.171381551	7.58	1.3	1.93	5.01	-4.3	1.59	0.89
Pd3M-Bi-W	-1.351321	0.44855808799999997	-0.45249910299999996	2.26724411	-0.573576186	2.983687965	2.215499279	7.98	0.86	2.36	5.09	0.77	1.56	1.27
Pd3M-Bi-Re	-0.756666	0.571509354	-0.904226705	2.231118205	-0.345927164	2.652084056	2.167982503	7.88	0.15	1.9	5.88	-0.51	1.52	1.2
Pd3M-Bi-Os	-0.2757	0.679725804	-1.188397832	2.063344473	-0.20681946899999998	2.73790595	2.2	8.7	1.1	2.2	6.25	-1.5	1.49	1.13
Pd3M-Bi-Ir	0.253436	0.775951055	-1.4667641230000001	1.900945781	0.064780863	2.958586436	2.2	9.1	1.57	2.2	6.63	-2.11	1.5	1.08
Pd3M-Bi-Au	1.490694	0.966436408	-2.9183330219999997	1.4287372109999998	1.355088646	5.789902939	2.2318437380000002	9.23	2.31	2.54	6.01	-3.56	1.59	1.01
Ni3M-Bi-Ti	-0.894524	0.234607685	0.715083641	1.9670242119999999	-0.674617963	3.407305165	1.8693133290000001	6.83	0.08	1.54	4.63	1.5	1.61	1.08
Ni3M-Bi-V	-0.942305	0.36207833700000003	-0.013753333000000001	1.948896138	-0.45690860200000005	3.165147657	1.8799607880000002	6.75	0.53	1.63	4.88	1.06	1.49	0.98
Ni3M-Bi-Cr	-0.38206999999999997	0.479882535	0.041885082000000004	2.2120438890000003	-0.17202156899999999	2.23499394	1.883392512	6.77	0.67	1.66	5.27	0.16	1.42	0.9
Ni3M-Bi-Mn	-0.038512	0.53944696	-0.385587765	2.3545001130000003	0.09482742	1.844399643	1.870523636	7.43	0.0	1.55	5.45	0.07	1.43	0.86
Ni3M-Bi-Co	0.33753299999999997	0.764678049	-1.477222179	1.672395545	0.334207049	3.2996334380000003	1.900718594	7.88	0.66	1.88	5.76	-1.17	1.39	0.76
Ni3M-Bi-Cu	0.9246979999999999	0.9657585809999999	-2.276087204	1.123437749	1.203405329	7.702041378	1.9089976359999998	7.73	1.24	1.9	5.3	-2.67	1.41	0.67
Ni3M-Bi-Nb	-1.2739200000000002	0.394058915	-0.33675601899999996	2.346335767	-0.300876886	2.492544176	1.8764717419999999	6.76	0.9	1.6	4.69	1.41	1.62	1.28
Ni3M-Bi-Mo	-0.9401870000000001	0.49976497299999995	-0.76795418	2.2303290319999998	-0.124551414	2.578488343	1.933639039	7.09	0.75	2.16	5.09	0.35	1.55	1.2
Ni3M-Bi-Ru	0.320204	0.717921248	-1.4046268990000002	1.998420399	0.294170156	2.9413803410000003	1.937190357	7.36	1.05	2.2	5.73	-1.41	1.48	1.05
Ni3M-Bi-Rh	0.56707	0.80530072	-1.661211964	1.858723127	0.532357823	3.462874457	1.9441220019999998	7.46	1.14	2.28	5.91	-1.73	1.49	0.99
Ni3M-Bi-Ta	-1.590614	0.36117996700000005	-0.197962232	2.529298053	-0.36323717	2.413615858	1.864400267	7.89	0.32	1.5	4.86	2.0	1.62	1.34
Ni3M-Bi-W	-1.384277	0.46318777299999997	-0.708866076	2.431115825	-0.186352933	2.445488622	1.950838109	7.98	0.86	2.36	5.09	0.77	1.56	1.27
Ni3M-Bi-Re	-0.9521209999999999	0.588434204	-1.156709225	2.355522584	-0.014635365	2.48343823	1.9089976359999998	7.88	0.15	1.9	5.88	-0.51	1.52	1.2
Ni3M-Bi-Os	-0.26782399999999995	0.690544191	-1.493918965	2.243686067	0.198803845	2.630578503	1.937190357	8.7	1.1	2.2	6.25	-1.5	1.49	1.13
Ni3M-Bi-Ir	0.389986	0.782123132	-1.867754137	2.097379751	0.495524831	3.0110726239999996	1.937190357	9.1	1.57	2.2	6.63	-2.11	1.5	1.08
Ni3M-Bi-Pt	0.897481	0.881639197	-2.467512794	1.885835238	0.889436052	3.91450639	1.9441220019999998	9.0	2.13	2.28	6.74	-2.25	1.53	1.04
Ni3M-Bi-Au	1.380123	0.9532185940000001	-3.73577895	1.60242515	1.8676952340000001	7.365391327	1.965230077	9.23	2.31	2.54	6.01	-3.56	1.59	1.01
Re3M-Bi-V	-0.8752700000000001	0.375444149	0.517201739	2.104557658	-0.549875569	3.2115377410000003	1.871100011	6.75	0.53	1.63	4.88	1.06	1.49	0.98
Re3M-Bi-Cr	-0.350206	0.492224657	0.103863947	2.253373397	-0.281036565	2.687010758	1.87451556	6.77	0.67	1.66	5.27	0.16	1.42	0.9
Re3M-Bi-Mn	-0.279672	0.563252906	-0.16809865300000001	1.9941279230000002	-0.187945676	3.28852539	1.861707339	7.43	0.0	1.55	5.45	0.07	1.43	0.86
Re3M-Bi-Co	0.669384	0.78107112	-1.068900205	1.7569247209999999	0.17793421	3.9296045439999996	1.8979904630000002	7.88	0.66	1.88	5.76	-1.17	1.39	0.76
Re3M-Bi-Cu	1.13479	0.959262292	-3.045838546	1.327199871	1.355145344	7.730906122	1.9	7.73	1.24	1.9	5.3	-2.67	1.41	0.67
Re3M-Bi-Mo	-0.553397	0.509441966	-0.145223943	2.635934109	-0.18520480399999997	2.227524605	1.9245252609999999	7.09	0.75	2.16	5.09	0.35	1.55	1.2
Re3M-Bi-Rh	0.837155	0.7956622990000001	-1.940783271	2.320359309	0.554594193	2.965128203	1.934958815	7.46	1.14	2.28	5.91	-1.73	1.49	0.99
Re3M-Bi-Pd	1.2032530000000001	0.9038699240000001	-2.866145669	2.032255029	1.01674892	4.148834175	1.9280598409999998	8.34	0.56	2.2	5.9	-1.83	1.52	0.94
Re3M-Bi-Ta	-1.4043809999999999	0.373013618	0.675157004	2.777169176	-0.46021733600000003	2.2421591469999997	1.855612831	7.89	0.32	1.5	4.86	2.0	1.62	1.34
Re3M-Bi-W	-0.8043130000000001	0.472092581	-0.00115964	2.8187338630000003	-0.216610898	2.110822644	1.941643267	7.98	0.86	2.36	5.09	0.77	1.56	1.27
Re3M-Bi-Ir	0.66054	0.778257323	-2.1509730780000003	2.598984876	0.550058744	2.7021364510000003	1.9280598409999998	9.1	1.57	2.2	6.63	-2.11	1.5	1.08
Re3M-Bi-Pt	1.04667	0.8673687440000001	-2.88368908	2.406993546	0.920959443	3.4259091460000004	1.934958815	9.0	2.13	2.28	6.74	-2.25	1.53	1.04
Rh3M-Bi-Ti	-0.855482	0.2289971	0.818977767	1.992444681	-1.021851043	3.7776517610000004	2.192266939	6.83	0.08	1.54	4.63	1.5	1.61	1.08
Rh3M-Bi-V	-0.7693409999999999	0.36450795399999997	-0.00327515	1.929328544	-0.7709015090000001	3.4647879269999997	2.204753916	6.75	0.53	1.63	4.88	1.06	1.49	0.98
Rh3M-Bi-Cr	-0.289204	0.471465829	0.074010721	2.2566061630000003	-0.31506987	2.235678839	2.208778525	6.77	0.67	1.66	5.27	0.16	1.42	0.9
Rh3M-Bi-Mn	0.054640999999999995	0.530767771	-0.531393947	2.422787681	0.002052029	1.7465733319999999	2.193686346	7.43	0.0	1.55	5.45	0.07	1.43	0.86
Rh3M-Bi-Co	0.38038099999999997	0.757281312	-1.384944809	1.67335918	0.152142072	2.9215099589999998	2.236439464	7.88	0.66	1.88	5.76	-1.17	1.39	0.76
Rh3M-Bi-Ni	0.568425	0.8641927359999999	-1.36997653	1.347673016	0.15581451	4.6388363660000005	2.23998288	7.64	1.16	1.91	5.77	-1.29	1.38	0.71
Rh3M-Bi-Cu	0.9842719999999999	0.964526762	-2.039023003	1.090317203	0.7405723009999999	6.7114445929999995	2.238807342	7.73	1.24	1.9	5.3	-2.67	1.41	0.67
Rh3M-Bi-Nb	-0.9626	0.37417002200000005	-0.006838693000000001	2.44988478	-0.591943196	2.293817885	2.200662082	6.76	0.9	1.6	4.69	1.41	1.62	1.28
Rh3M-Bi-Mo	-0.52578	0.48271215799999995	-0.663335239	2.3202586259999998	-0.359887835	2.376598256	2.2677059390000003	7.09	0.75	2.16	5.09	0.35	1.55	1.2
Rh3M-Bi-Ru	0.34003	0.7107805859999999	-1.3404939790000001	1.9910337669999998	-0.010067636	2.7787776319999997	2.271870804	7.36	1.05	2.2	5.73	-1.41	1.48	1.05
Rh3M-Bi-Pd	0.935024	0.904270696	-2.245322674	1.607200236	0.660571716	3.866651821	2.271870804	8.34	0.56	2.2	5.9	-1.83	1.52	0.94
Rh3M-Bi-Ta	-1.161908	0.340968702	0.24595889899999998	2.631571444	-0.649025783	2.2668589619999997	2.1865050669999997	7.89	0.32	1.5	4.86	2.0	1.62	1.34
Rh3M-Bi-W	-0.8252139999999999	0.445032699	-0.552962026	2.539427914	-0.394160626	2.249574205	2.287876422	7.98	0.86	2.36	5.09	0.77	1.56	1.27
Rh3M-Bi-Re	-0.566839	0.568218306	-1.127348091	2.408089837	-0.20617039199999998	2.332181219	2.238807342	7.88	0.15	1.9	5.88	-0.51	1.52	1.2
Rh3M-Bi-Ir	0.41309799999999997	0.77058147	-1.8514105769999998	2.120043424	0.238569196	2.7132946660000004	2.271870804	9.1	1.57	2.2	6.63	-2.11	1.5	1.08
Rh3M-Bi-Pt	0.811723	0.866646335	-2.390141978	1.8967344030000002	0.632715289	3.3501527660000003	2.28	9.0	2.13	2.28	6.74	-2.25	1.53	1.04
Ir3M-Bi-Ti	-0.679682	0.22904322100000002	0.965352122	2.161751149	-1.215222118	4.294260941	2.1229144090000003	6.83	0.08	1.54	4.63	1.5	1.61	1.08
Ir3M-Bi-Cu	1.278369	0.9616604240000001	-2.271215036	1.193592939	0.327971296	6.362378101	2.167982503	7.73	1.24	1.9	5.3	-2.67	1.41	0.67
Ir3M-Bi-Nb	-0.710203	0.38102911100000003	-0.016543318	2.73471141	-0.714351015	2.502610952	2.131043972	6.76	0.9	1.6	4.69	1.41	1.62	1.28
Ir3M-Bi-Mo	-0.330805	0.48931616200000005	-0.7292124790000001	2.588756908	-0.48555285200000003	2.550969601	2.195966891	7.09	0.75	2.16	5.09	0.35	1.55	1.2
Ir3M-Bi-Ru	0.6155079999999999	0.706911706	-1.4751264309999998	2.257858356	-0.195487647	2.765707578	2.2	7.36	1.05	2.2	5.73	-1.41	1.48	1.05
Ir3M-Bi-Rh	0.80898	0.78654834	-1.925800491	2.119875963	0.057705516	2.956343333	2.207872028	7.46	1.14	2.28	5.91	-1.73	1.49	0.99
Ir3M-Bi-Pd	1.123154	0.899496071	-2.506048464	1.817228831	0.38237001	3.50043419	2.2	8.34	0.56	2.2	5.9	-1.83	1.52	0.94
Ir3M-Bi-Ag	1.701944	0.965880935	-3.677094363	1.470520986	1.496874649	6.7617077860000006	2.171381551	7.58	1.3	1.93	5.01	-4.3	1.59	0.89
Ir3M-Bi-Ta	-0.938103	0.349817651	0.198580148	2.896966915	-0.753914871	2.464494848	2.117334815	7.89	0.32	1.5	4.86	2.0	1.62	1.34
Ir3M-Bi-W	-0.7053560000000001	0.448961486	-0.623657706	2.803950421	-0.51088707	2.4300497709999997	2.215499279	7.98	0.86	2.36	5.09	0.77	1.56	1.27
Ir3M-Bi-Re	-0.457128	0.568251057	-1.188741745	2.682267773	-0.33125602600000004	2.470737415	2.167982503	7.88	0.15	1.9	5.88	-0.51	1.52	1.2
Ir3M-Bi-Os	0.092535	0.678344272	-1.590077704	2.553835141	-0.174162738	2.503867987	2.2	8.7	1.1	2.2	6.25	-1.5	1.49	1.13
Ir3M-Bi-Pt	0.971968	0.8614112079999999	-2.682038096	2.156475689	0.413969564	3.038220012	2.207872028	9.0	2.13	2.28	6.74	-2.25	1.53	1.04
Ir3M-Bi-Au	1.616247	0.947681186	-3.58904898	1.7691370640000001	1.102491415	4.760102486	2.2318437380000002	9.23	2.31	2.54	6.01	-3.56	1.59	1.01
